# Supplementary material for: Gold(i)-catalysed hydroarylations of alkynes for the synthesis of inherently chiral calix[4]arenes
Source: Royal Society of Chemistry journal article supplement (doi:10.1039/d3ob00603d), 2023-01-01
Supplement: d3ob00603d1.pdf [file d3ob00603d1.pdf]

## Table of contents

|                                                |    |
|------------------------------------------------|----|
| • General remarks and materials                | 1  |
| • Synthesis and characterisation of substrates | 2  |
| • NMR analysis of 4b'                          | 18 |
| • Reactivity with substrate 7a                 | 19 |
| • Preliminary enantioselective studies         | 24 |
| • NMR spectra                                  | 26 |
| • References                                   | 96 |

- **General remarks and materials**

All chemicals those syntheses are not reported hereafter were purchased from commercial sources and used as received. Solvents were dried and stored over molecular sieves previously activated in an oven (450 °C overnight). Anhydrous CH<sub>2</sub>Cl<sub>2</sub> for catalytic reactions was supplied by Fluka in Sureseal® bottles and used without any further purification. Melting points were measured with an Electrothermal apparatus and are uncorrected. Column chromatography was performed on silica gel 60 (70-230 mesh). NMR spectra were recorded on a Bruker 400 MHz and JEOL 600 MHz using solvents as internal standards (7.26 ppm for <sup>1</sup>H NMR and 77.00 ppm for <sup>13</sup>C NMR for CDCl<sub>3</sub>). The terms m, s, d, t, q and quint represent multiplet, singlet, doublet, triplet, quadruplet and quintuplet, respectively, and the term br means a broad signal. <sup>13</sup>C DEPTQ NMR spectra are reported for substrates and corresponding products. Exact masses were recorded on an LTQ ORBITRAP XL Thermo Mass Spectrometer (ESI source).

*Materials:* **MN1** and **MN2** derivatives were synthesized according to known procedures.<sup>[1]</sup> Substituted propargyl bromide derivatives were synthesized in variable yields (72-86%) from propargyl alcohol and commercially available aryl iodides following typical protocols. *Step 1:* Propargyl alcohol/aryl iodide/Bis-(triphenylphosphine)-palladium(II) chloride/CuI (1.1/1.0/0.02/0.04 equiv.), TEA (0.2 M), r.t., 4 hs;<sup>[2]</sup> *Step 2:* substituted propargyl alcohol derivative/PPh<sub>3</sub>/CBr<sub>4</sub> (1.0/1.5/1.5 eq.), CH<sub>2</sub>Cl<sub>2</sub> (0.2 M), r.t., 2 hs.<sup>[3]</sup>

- Synthesis and characterisation of substrates

**General procedure:**

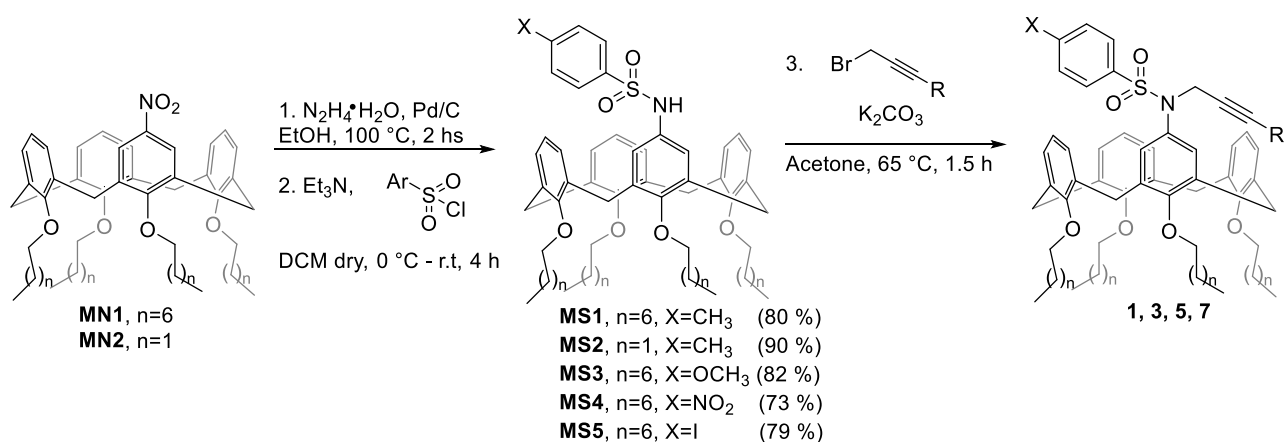

In a two-necked round bottom flask, under nitrogen atmosphere, Pd/C (cat. amount) and hydrazine monohydrate (60 eq.) were added to a suspension of **MN** (200 mg, 0.22 mmol) in EtOH (20 mL). The reaction was heated to 100 °C and let react under reflux for 2 hrs. The reaction was monitored by TLC (n-Hex:EtOAc 9:1). Once the reaction was completed, the mixture was cooled to r.t. and filtered through celite and the solvent removed under low pressure. Water and DCM were added to the residue and the organic phase was recovered, washed with water (2 x 30 mL) and brine (30 mL), dried over  $\text{Na}_2\text{SO}_4$ , filtered and the solvent removed under low pressure. The crude was used in the next step without further purification. The mono-ammino derivative was then dissolved in dry DCM, under nitrogen atmosphere, and  $\text{Et}_3\text{N}$  (3 eq.) and the respective sulphonyl chloride (1 eq.) were added at 0 °C. The mixture was let warm up at r.t. and stirred for 4 h. The reaction was monitored by TLC (n-Hex:EtOAc 9:1). Once the reaction was completed, water was added to the mixture. The organic phase was separated and washed with water (2x 30 mL) and brine (30 mL), dried over  $\text{Na}_2\text{SO}_4$  and the solvent removed under low pressure. The crude was purified by column chromatography on silica gel (n-Hex:EtOAc 9:1). Finally, the **MS** intermediate was dissolved in Acetone (10 mL) along with  $\text{K}_2\text{CO}_3$  (2.5 eq.) and the respective propargyl bromide derivative (1.5 eq.). The mixture was warmed to 65 °C and stirred for 1.5 h. The reaction was monitored by TLC (n-Hex:EtOAc 9:1). Once the reaction was completed, water was added to the mixture. The organic phase was separated and washed with water (2x 30 mL) and brine (30 mL), dried over  $\text{Na}_2\text{SO}_4$  and the solvent removed under low pressure. The crude was purified by column chromatography on silica gel (n-Hex:EtOAc 9:1), obtaining the desired substrate.

**1a**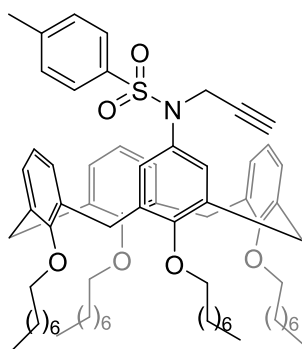

General procedure was followed using **MS1** (229 mg, 0.22 mmol) and propargyl bromide (36  $\mu$ L, 1.5 eq.). Purification by column chromatography on silica gel (*n*-hexane/EtOAc 9:1) yielded **1a** (204 mg, 86 %) as a white solid, **M.p.** = 111 – 112 °C. **<sup>1</sup>H NMR:** (400 MHz, CDCl<sub>3</sub>)  $\delta$  = 7.61 (d, *J* = 8.2 Hz, 2H), 7.26 (d, *J* = 8.1 Hz, 2H), 6.75 (d, *J* = 7.4 Hz, 2H), 6.66 – 6.47 (m, 7H), 6.40 (dd, *J* = 7.5 Hz, 1.8 Hz, 2H), 4.45 (d, *J* = 13.2 Hz, 2H), 4.40 (d, *J* = 13.2 Hz, 2H), 4.17 (d, *J* = 2.5 Hz, 2H), 3.94 – 3.83 (m, 8H), 3.16 (d, *J* = 13.3 Hz, 2H), 3.06 (d, *J* = 13.3 Hz, 2H), 2.45 (s, 3H), 2.06 (t, *J* = 2.4 Hz, 1H), 1.96 – 1.89 (m, 8H), 1.49 – 1.31 (m, 40H), 0.94 – 0.90 (m, 12H). **<sup>13</sup>C NMR** (101 MHz, CDCl<sub>3</sub>)  $\delta$  = 156.8 (C<sub>q</sub>), 156.7 (C<sub>q</sub>), 156.3 (C<sub>q</sub>), 143.3 (C<sub>q</sub>), 136.2 (C<sub>q</sub>), 136.0 (C<sub>q</sub>), 135.3 (C<sub>q</sub>), 134.9 (C<sub>q</sub>), 134.3 (C<sub>q</sub>), 133.0 (C<sub>q</sub>), 129.0 (CH), 128.5 (CH), 128.3 (CH), 128.3 (CH), 128.2 (CH), 128.0 (CH), 122.0 (CH), 121.9 (CH), 77.3 (CH), 75.4 (CH<sub>2</sub>), 75.3 (CH<sub>2</sub>), 75.2 (CH<sub>2</sub>), 73.5 (C<sub>q</sub>), 41.5 (CH<sub>2</sub>), 32.0 (CH<sub>2</sub>), 31.0 (CH<sub>2</sub>), 30.9 (CH<sub>2</sub>), 30.4 (CH<sub>2</sub>), 30.3 (CH<sub>2</sub>), 30.0 (CH<sub>2</sub>), 29.9 (CH<sub>2</sub>), 29.6 (CH<sub>2</sub>), 29.6 (CH<sub>2</sub>), 26.4 (CH<sub>2</sub>), 26.3 (CH<sub>2</sub>), 26.3 (CH<sub>2</sub>), 22.7 (CH<sub>2</sub>), 21.6 (CH<sub>3</sub>), 14.1 (CH<sub>3</sub>). **LC-MS:** *m/z* [M+NH<sub>4</sub>]<sup>+</sup> calculated for C<sub>70</sub>H<sub>101</sub>N<sub>2</sub>O<sub>6</sub>S: 1097.74; found: 1097.42. **HR-MS** (ESI) *m/z*: [M+H]<sup>+</sup> calcd. for C<sub>70</sub>H<sub>98</sub>NO<sub>6</sub>S 1080.7155; found 1080.7160.

**1b**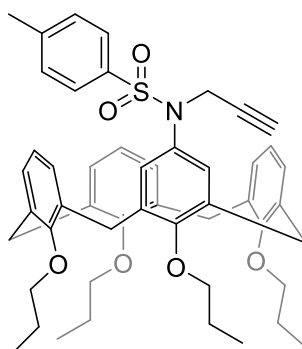

General procedure was followed using **MS2** (236 mg, 0.31 mmol) and propargyl bromide (50  $\mu$ L, 1.5 eq.). Purification by column chromatography on silica gel (*n*-hexane/EtOAc 9:1) yielded **1b** (193 mg, 78 %) as a white solid, **M.p.** = 115-115 °C. **<sup>1</sup>H NMR:** (400 MHz, CDCl<sub>3</sub>)  $\delta$  = 8.28 (d, *J* = 8.4 Hz, 2H), 8.01 (d, *J* = 8.0 Hz, 2H), 6.76 (d, *J* = 7.2 Hz, 2H), 6.64 (t, *J* = 8.4 Hz, 3H), 6.57–6.49 (m, 4H), 6.39 (dd, *J* = 7.6 Hz, 2.0 Hz, 2H), 4.46 (d, *J* = 13.3 Hz, 2H), 4.41 (d, *J* = 13.3 Hz, 2H), 4.17 (d, *J* = 2.4 Hz, 2H), 3.91 – 3.80 (m, 8H), 3.17 (d, *J* = 13.2 Hz, 2H), 3.07 (d, *J* = 13.2 Hz, 2H), 2.46 (s, 3H), 2.07 (t, *J* = 2.4 Hz, 1H), 1.99 – 1.89 (m, 8H), 1.04 – 0.97 (m, 12H). **<sup>13</sup>C NMR:** (101 MHz, CDCl<sub>3</sub>)  $\delta$  = 156.8 (C<sub>q</sub>), 156.7 (C<sub>q</sub>), 156.2 (C<sub>q</sub>), 143.3 (C<sub>q</sub>), 136.2 (C<sub>q</sub>), 135.9 (C<sub>q</sub>), 135.9 (C<sub>q</sub>),

134.8 (C<sub>q</sub>), 134.2 (C<sub>q</sub>), 133.0 (C<sub>q</sub>), 129.0 (CH), 128.5 (CH), 128.4 (CH), 128.3 (CH), 128.2 (CH), 128.0 (CH), 122.0 (CH), 121.9 (CH), 77.2 (CH), 76.9 (CH<sub>2</sub>), 76.8 (CH<sub>2</sub>), 76.7 (CH<sub>2</sub>), 73.6 (C<sub>q</sub>), 41.5 (CH<sub>2</sub>), 31.0 (CH<sub>2</sub>), 30.9 (CH<sub>2</sub>), 23.3 (CH<sub>2</sub>), 23.2 (CH<sub>2</sub>), 21.6 (CH<sub>2</sub>), 10.8 (CH<sub>3</sub>), 10.3 (CH<sub>3</sub>), 10.2 (CH<sub>3</sub>). **LC-MS:**  $m/z$  [M+NH<sub>4</sub>]<sup>+</sup> calculated for C<sub>50</sub>H<sub>61</sub>N<sub>2</sub>O<sub>6</sub>S: 817.43; found: 818.03. **HR-MS** (ESI)  $m/z$ : [M+H]<sup>+</sup> calcd. for C<sub>50</sub>H<sub>58</sub>NO<sub>6</sub>S 800.3985; found 800.3991.

### 1c

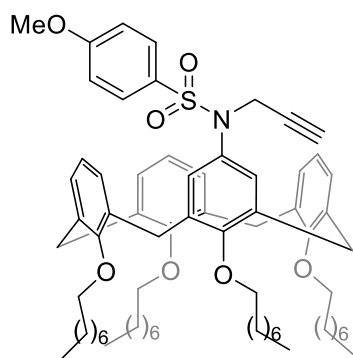

General procedure was followed using **MS3** (233 mg, 0.22 mmol) and propargyl bromide (36  $\mu$ L, 1.5 eq.). Purification by column chromatography on silica gel (*n*-hexane/EtOAc 9:1) yielded **1c** (174 mg, 72 %) as a colourless oil. **<sup>1</sup>H NMR:** (400 MHz, CDCl<sub>3</sub>)  $\delta$  = 7.66 (d,  $J$  = 8.9 Hz, 2H), 6.94 (d,  $J$  = 8.9 Hz, 2H), 6.74 (d,  $J$  = 7.4 Hz, 2H), 6.63 – 6.58 (m, 5H), 6.53 (t,  $J$  = 7.4 Hz, 2H), 6.46 – 6.41 (m, 2H), 4.45 (d,  $J$  = 13.2 Hz, 2H), 4.41 (d,  $J$  = 13.2 Hz, 2H), 4.16 (d,  $J$  = 2.5 Hz, 2H), 3.94 – 3.85 (m, 11H), 3.17 (d,  $J$  = 13.3 Hz, 2H), 3.07 (d,  $J$  = 13.3 Hz, 2H), 2.07 (t,  $J$  = 2.5 Hz, 1H), 1.97 – 1.90 (m, 8H), 1.42 – 1.32 (m, 40H), 0.95 – 0.91 (m, 12H). **<sup>13</sup>C NMR:** (101 MHz, CDCl<sub>3</sub>)  $\delta$  = 162.9 (C<sub>q</sub>), 156.8 (C<sub>q</sub>), 156.7 (C<sub>q</sub>), 156.3 (C<sub>q</sub>), 135.9 (C<sub>q</sub>), 135.2 (C<sub>q</sub>), 135.0 (C<sub>q</sub>), 134.4 (C<sub>q</sub>), 133.2 (C<sub>q</sub>), 130.9 (C<sub>q</sub>), 130.4 (CH), 128.4 (CH), 128.3 (CH), 128.2 (CH), 128.0 (CH), 122.0 (CH), 121.9 (CH), 113.5 (CH), 77.4 (CH), 75.4 (CH<sub>2</sub>), 75.3 (CH<sub>2</sub>), 75.2 (CH<sub>2</sub>), 73.5 (C<sub>q</sub>), 35.6 (CH<sub>3</sub>), 41.5 (CH<sub>2</sub>), 32.0 (CH<sub>2</sub>), 31.0 (CH<sub>2</sub>), 30.9 (CH<sub>2</sub>), 30.4 (CH<sub>2</sub>), 30.3 (CH<sub>2</sub>), 30.0 (CH<sub>2</sub>), 29.9 (CH<sub>2</sub>), 29.7 (CH<sub>2</sub>), 26.5 (CH<sub>2</sub>), 26.4 (CH<sub>2</sub>), 26.3 (CH<sub>2</sub>), 22.7 (CH<sub>2</sub>), 14.2 (CH<sub>3</sub>). **LC-MS:**  $m/z$  [M+Na]<sup>+</sup> calculated for C<sub>70</sub>H<sub>97</sub>NNaO<sub>7</sub>S: 1118.69; found: 1118.17. **HR-MS** (ESI)  $m/z$ : [M+H]<sup>+</sup> calcd. for C<sub>70</sub>H<sub>98</sub>NO<sub>7</sub>S 1096.7064; found 1096.7060.

**1d**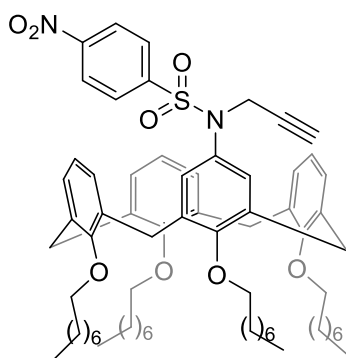

General procedure was followed using **MS4** (236 mg, 0.22 mmol) and propargyl bromide (36  $\mu$ L, 1.5 eq.). Purification by column chromatography on silica gel (*n*-hexane/EtOAc 9:1) yielded **1d** (203 mg, 83 %) as a yellowish oil.  $^1\text{H NMR}$ : (400 MHz,  $\text{CDCl}_3$ )  $\delta$  = 8.28 (d,  $J$  = 8.8 Hz, 2H), 7.81 (d,  $J$  = 8.8 Hz, 2H), 6.82 (dd,  $J$  = 7.4 Hz, 1.9 Hz, 2H), 6.69 – 6.57 (m, 6H), 6.48 – 6.44 (m, 3H), 4.46 (d,  $J$  = 12.7 Hz, 2H), 4.42 (d,  $J$  = 12.7 Hz, 2H), 4.07 (d,  $J$  = 2.5 Hz, 2H), 4.02 – 3.92 (m, 4H), 3.84 (dt,  $J$  = 14.9 Hz, 7.2 Hz, 4H), 3.18 (d,  $J$  = 13.2 Hz, 2H), 3.08 (d,  $J$  = 13.2 Hz, 2H), 2.01 (t,  $J$  = 2.4 Hz, 1H), 1.97 – 1.90 (m, 8H), 1.47 – 1.28 (m, 40H), 0.94 – 0.90 (m, 12H).  $^{13}\text{C NMR}$ : (101 MHz,  $\text{CDCl}_3$ )  $\delta$  = 156.8 ( $\text{C}_q$ ), 156.7 ( $\text{C}_q$ ), 156.3 ( $\text{C}_q$ ), 149.9 ( $\text{C}_q$ ), 145.2 ( $\text{C}_q$ ), 135.8 ( $\text{C}_q$ ), 135.8 ( $\text{C}_q$ ), 134.9 ( $\text{C}_q$ ), 134.4 ( $\text{C}_q$ ), 132.6 ( $\text{C}_q$ ), 129.4 (CH), 128.7 (CH), 128.1 (CH), 128.0 (CH), 127.9 (CH), 123.5 (CH), 122.1 (CH), 121.9 (CH), 77.2 (CH), 75.6 ( $\text{CH}_2$ ), 75.5 ( $\text{CH}_2$ ), 75.2 ( $\text{CH}_2$ ), 74.2 ( $\text{C}_q$ ), 41.9 ( $\text{CH}_2$ ), 32.0 ( $\text{CH}_2$ ), 31.0 ( $\text{CH}_2$ ), 30.9 ( $\text{CH}_2$ ), 30.5 ( $\text{CH}_2$ ), 30.2 ( $\text{CH}_2$ ), 30.0 ( $\text{CH}_2$ ), 29.9 ( $\text{CH}_2$ ), 29.7 ( $\text{CH}_2$ ), 29.6 ( $\text{CH}_2$ ), 26.5 ( $\text{CH}_2$ ), 26.4 ( $\text{CH}_2$ ), 26.3 ( $\text{CH}_2$ ), 22.7 ( $\text{CH}_2$ ), 14.1 ( $\text{CH}_3$ ). **LC-MS**:  $m/z$  [ $\text{M}+\text{K}$ ] $^+$  calculated for  $\text{C}_{69}\text{H}_{94}\text{KN}_2\text{O}_8\text{S}$ : 1149.64; found: 1149.37. **HR-MS** (ESI)  $m/z$ : [ $\text{M}+\text{H}$ ] $^+$  calcd. for  $\text{C}_{69}\text{H}_{95}\text{N}_2\text{O}_8\text{S}$  1111.6809; found 1111.6802.

**1e**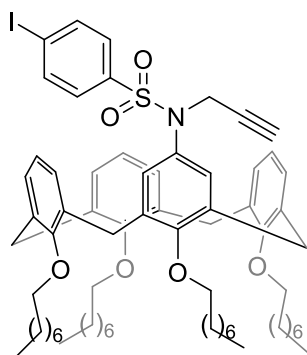

General procedure was followed using **MS5** (254 mg, 0.22 mmol) and propargyl bromide (36  $\mu$ L, 1.5 eq.). Purification by column chromatography on silica gel (*n*-hexane/EtOAc 9:1) yielded **1e** (207 mg, 79 %) as a colourless oil.  $^1\text{H NMR}$ : (400 MHz,  $\text{CDCl}_3$ )  $\delta$  = 7.82 (d,  $J$  = 8.4 Hz, 2H), 7.40 (d,  $J$  = 8.5 Hz, 2H), 6.72 – 6.59 (m, 6H), 6.57 – 6.52 (m, 5H), 4.46 (d,  $J$  = 13.1 Hz, 2H), 4.42 (d,  $J$  = 13.2 Hz, 2H), 4.11 (d,  $J$  = 2.5 Hz, 2H), 3.96 – 3.85 (m, 8H), 3.18 (d,  $J$  = 13.3 Hz, 2H), 3.08 (d,  $J$  = 13.3 Hz, 2H), 2.06 (t,  $J$  = 2.5 Hz, 1H), 1.97 – 1.90 (m, 8H), 1.42 – 1.29 (m, 40H), 0.96 – 0.91 (m, 12H).  $^{13}\text{C NMR}$ : (101 MHz,  $\text{CDCl}_3$ )  $\delta$  = 156.6 ( $\text{C}_q$ ), 156.6 ( $\text{C}_q$ ), 138.9 ( $\text{C}_q$ ), 137.6 (CH), 135.8 ( $\text{C}_q$ ), 135.3 ( $\text{C}_q$ ), 134.9 ( $\text{C}_q$ ), 134.6 ( $\text{C}_q$ ), 132.8 ( $\text{C}_q$ ), 129.7 (CH), 128.4 (CH), 128.2 (CH), 128.0 (CH),

122.1 (CH), 121.9 (CH), 99.92 (C<sub>q</sub>), 77.2 (CH), 75.4 (CH<sub>2</sub>), 75.3 (CH<sub>2</sub>), 75.2 (CH<sub>2</sub>), 74.0 (C<sub>q</sub>), 41.7 (CH<sub>2</sub>), 32.0 (CH<sub>2</sub>), 31.0 (CH<sub>2</sub>), 30.9 (CH<sub>2</sub>), 30.4 (CH<sub>2</sub>), 30.4 (CH<sub>2</sub>), 30.3 (CH<sub>2</sub>), 30.0 (CH<sub>2</sub>), 29.9 (CH<sub>2</sub>), 29.7 (CH<sub>2</sub>), 29.6 (CH<sub>2</sub>), 26.4 (CH<sub>2</sub>), 26.4 (CH<sub>2</sub>), 22.8 (CH<sub>2</sub>), 14.1 (CH<sub>3</sub>). **LC-MS**: *m/z* [M+NH<sub>4</sub>]<sup>+</sup> calculated for C<sub>69</sub>H<sub>98</sub>IN<sub>2</sub>O<sub>6</sub>S: 1209.62; found: 1209.05. **HR-MS** (ESI) *m/z*: [M+H]<sup>+</sup> calcd. for C<sub>69</sub>H<sub>95</sub>INO<sub>6</sub>S 1192.5925; found 1192.5919.

### 3a

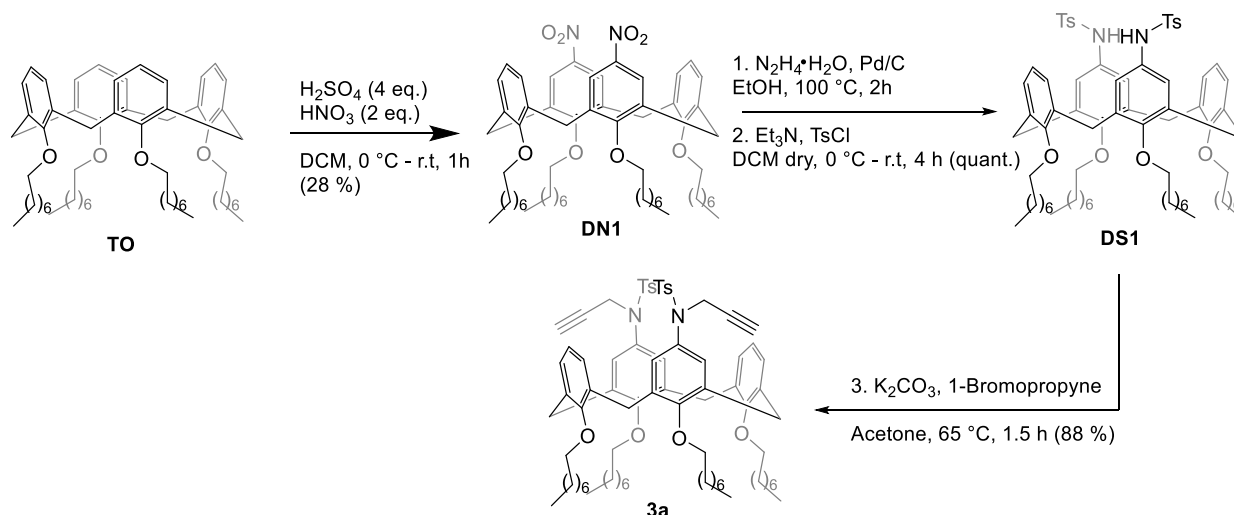

Into a round bottom flask, H<sub>2</sub>SO<sub>4</sub> (375 μL, 4 eq.) and HNO<sub>3</sub> (235 μL, 2 eq.) were added to a solution of **TO** (1 g, 1.69 mmol) in DCM (100 mL) at 0 °C. After 5 minutes the mixture was allowed to warm up to r.t and left under magnetic stirring for 1h. The reaction was monitored by TLC (*n*-hexane/EtOAc 95:5). Upon complete conversion of the starting material, the reaction was quenched with water (50 mL). The organic phase was separated and washed with water (2x 30 mL) and brine (30 mL), dehydrated with Na<sub>2</sub>SO<sub>4</sub> and filtered. The crude was purified by column chromatography on silica gel (*n*-hexane/EtOAc 95:5) yielding **DN1** (350 mg, 28%) as a red waxy solid. Into a two-necked round bottom flask, under nitrogen atmosphere, Pd/C (cat. amount) and hydrazine monohydrate (940 μL, 60 eq.) were added to a suspension of **DN1** (200 mg, 0.21 mmol) in EtOH (20 mL). The reaction was heated to 100 °C and let react under reflux for 2 h. The reaction was monitored by TLC (*n*-Hex:EtOAc 9:1). Once the reaction was completed, the mixture was cooled to r.t. and filtered through celite and the solvent removed under low pressure. Water and DCM were added to the residue and the organic phase was recovered, washed with water (2 x 30 mL) and brine (30 mL), dehydrated with Na<sub>2</sub>SO<sub>4</sub>, filtered and the solvent removed under low pressure. The crude was used in the next step without further purification. The di-ammino derivative was then dissolved in dry DCM, under nitrogen atmosphere, and Et<sub>3</sub>N (4 eq.) and *p*-toluensulfonyl chloride (2 eq.) were added at 0 °C. The mixture was let warm up at r.t. and stirred for 4 h. The reaction was monitored by TLC (*n*-Hex:EtOAc 9:1). Once the reaction was completed, water was added to the mixture. The organic phase was separated and washed with water (2x 30 mL) and brine (30 mL), dried over Na<sub>2</sub>SO<sub>4</sub> and the solvent removed under low pressure. The crude was purified by column chromatography on silica gel (*n*-Hex:EtOAc 9:1). Finally, the **DS1** intermediate was dissolved in Acetone (10mL) along with K<sub>2</sub>CO<sub>3</sub> (116 mg, 4 eq.) and propargyl bromide (70 μL, 3 eq.). The

mixture was warmed to 65 °C and stirred for 1.5 h. The reaction was monitored by TLC (n-Hex:EtOAc 9:1). Once the reaction was completed, water was added to the mixture. The organic phase was separated and washed with water (2x 30 mL) and brine (30 mL), dried over Na<sub>2</sub>SO<sub>4</sub> and the solvent removed under low pressure. The crude was purified by column chromatography on silica gel (n-Hex:EtOAc 9:1), yielding **3a** (249 mg, 88 %) as a colourless oil. <sup>1</sup>H NMR: (400 MHz, CDCl<sub>3</sub>) δ = 7.70 (d, *J* = 8.3 Hz, 4H), 7.31 (d, *J* = 8.3 Hz, 4H), 7.04 (s, 4H), 6.24 (t, *J* = 7.6 Hz, 2H), 5.99 (d, *J* = 7.6 Hz, 4H), 4.52 (d, *J* = 2.5 Hz, 4H), 4.37 (d, *J* = 13.4 Hz, 4H), 4.10 – 4.02 (m, 4), 3.65 (t, *J* = 6.6 Hz, 4H), 3.04 (d, *J* = 13.4 Hz, 4H), 2.45 (s, 6H), 2.26 (t, *J* = 2.5 Hz, 2H), 1.99 – 1.79 (m, 8H), 1.60 – 1.49 (m, 4H), 1.42 – 1.20 (m, 36H), 0.96 – 0.88 (m, 12H). <sup>13</sup>C NMR: (101 MHz, CDCl<sub>3</sub>) δ = 157.8 (C<sub>q</sub>), 155.2 (C<sub>q</sub>), 143.5 (C<sub>q</sub>), 137.5 (2C<sub>q</sub>), 135.9 (C<sub>q</sub>), 132.7 (2C<sub>q</sub>), 132.6 (C<sub>q</sub>), 129.2 (CH), 128.9 (CH), 128.2 (CH), 127.5 (CH), 121.9 (CH), 77.2 (CH), 75.4 (CH<sub>2</sub>), 75.1 (CH<sub>2</sub>), 73.6 (C<sub>q</sub>), 41.4 (CH<sub>2</sub>), 32.0 (CH<sub>2</sub>), 30.9 (CH<sub>2</sub>), 30.5 (CH<sub>2</sub>), 30.2 (CH<sub>2</sub>), 30.1 (CH<sub>2</sub>), 29.8 (CH<sub>2</sub>), 29.7 (CH<sub>2</sub>), 29.5 (CH<sub>2</sub>), 26.7 (CH<sub>2</sub>), 26.0 (CH<sub>2</sub>), 22.8 (CH<sub>2</sub>), 22.7 (CH<sub>2</sub>), 21.7 (CH<sub>3</sub>), 14.1 (CH<sub>3</sub>). **LC-MS**: *m/z* [M+Na]<sup>+</sup> calculated for C<sub>80</sub>H<sub>106</sub>N<sub>2</sub>NaO<sub>8</sub>S<sub>2</sub>: 1309.73; found: 1309.26. **HR-MS** (ESI) *m/z*: [M+H]<sup>+</sup> calcd. for C<sub>80</sub>H<sub>107</sub>N<sub>2</sub>O<sub>8</sub>S<sub>2</sub> 1287.7469; found 1287.7466.

### 3b

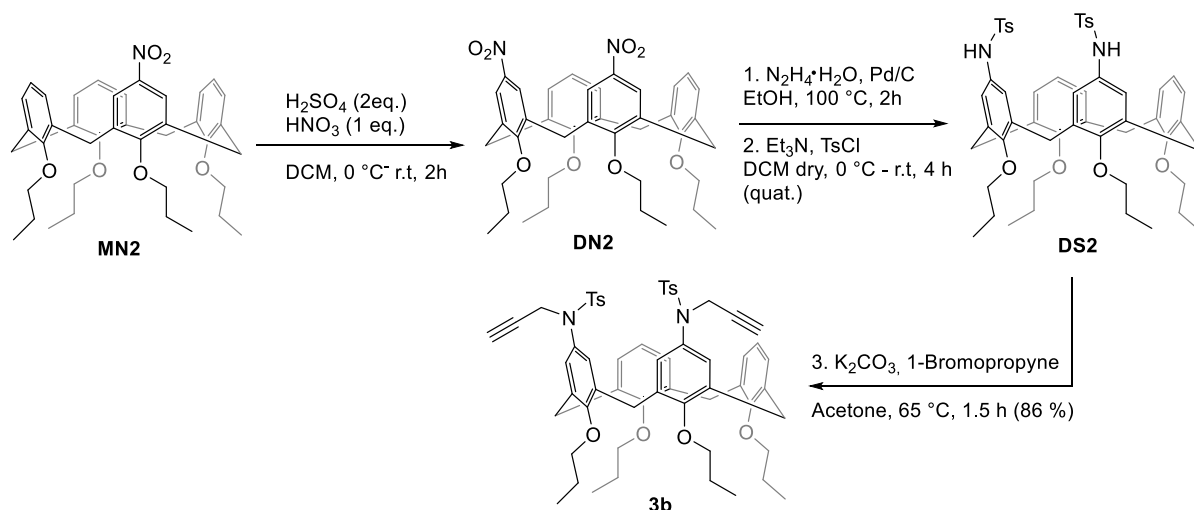

Into a round bottom flask, H<sub>2</sub>SO<sub>4</sub> (175 μL, 2 eq.) and HNO<sub>3</sub> (110 μL, 1 eq.) were added to a solution of **MN2** (1 g, 1.57 mmol) in DCM (100 mL) at 0 °C. After 5 minutes the mixture was allowed to warm up to r.t and left under magnetic stirring for 1h. The reaction was monitored by TLC (n-hexane/EtOAc 95:5). Upon complete conversion of the starting material, the reaction was quenched with water (50 mL). The organic phase was separated and washed with water (2x 30 mL) and brine (30 mL), dried over Na<sub>2</sub>SO<sub>4</sub> and filtered. The crude was purified by column chromatography on silica gel (n-hexane/EtOAc 95:5) yielding **DN2** (343 mg, 32%) as a red waxy solid. Into a two-necked round bottom flask, under nitrogen atmosphere, Pd/C (cat. amount) and hydrazine monohydrate (1300 μL, 60 eq.) were added to a suspension of **DN2** (200 mg, 0.29 mmol) in EtOH (20 mL). The reaction was heated to 100 °C and let react under reflux for 2 h. The reaction was monitored by TLC (n-Hex:EtOAc 9:1). Once the reaction was completed, the mixture was cooled to r.t. and filtered through



celite and the solvent removed under low pressure. Water and DCM were added to the residue and the organic phase was recovered, washed with water (2 x 30 mL) and brine (30 mL), dehydrated with Na<sub>2</sub>SO<sub>4</sub>, filtered and the solvent removed under low pressure. The crude was used in the next step without further purification. The di-ammino derivative was then dissolved in dry DCM, under nitrogen atmosphere, and Et<sub>3</sub>N (4 eq.) and p-toluensulphonyl chloride (2 eq.) were added at 0 °C. The mixture was let warm up at r.t. and stirred for 4 h. The reaction was monitored by TLC (n-Hex:EtOAc 9:1). Once the reaction was completed, water was added to the mixture. The organic phase was separated and washed with water (2x 30 mL) and brine (30 mL), dried over Na<sub>2</sub>SO<sub>4</sub> and the solvent removed under low pressure. The crude was purified by column chromatography on silica gel (n-Hex:EtOAc 9:1). Finally, the **DS2** intermediate was dissolved in Acetone (10mL) along with K<sub>2</sub>CO<sub>3</sub> (116 mg, 4 eq.) and 1-bromopropyne (70 μL, 3 eq.). The mixture was warmed to 65 °C and stirred for 1.5 h. The reaction was monitored by TLC (n-Hex:EtOAc 9:1). Once the reaction was completed, water was added to the mixture. The organic phase was separated and washed with water (2x 30 mL) and brine (30 mL), dried over Na<sub>2</sub>SO<sub>4</sub> and the solvent removed under low pressure. The crude was purified by column chromatography on silica gel (n-Hex:EtOAc 9:1), yielding **3b** (251 mg, 86 %) as a colourless oil. **<sup>1</sup>H NMR:** (400 MHz, CDCl<sub>3</sub>) δ = 7.59 (d, *J* = 8.4 Hz, 4H), 7.32 (d, *J* = 8.1 Hz, 4H), 6.68 (dd, *J* = 6.8 Hz, 2.4 Hz, 2H), 6.57 – 6.49 (m, 8H), 4.44 (d, *J* = 13.1 Hz, 1H), 4.40 (d, *J* = 13.1 Hz, 2H), 4.36 (d, *J* = 13.1 Hz, 1H), 4.24 (dd, *J* = 17.6 Hz, 2.5 Hz, 2H), 3.96 (dd, *J* = 17.7 Hz, 2.5 Hz, 2H), 3.89 – 3.81 (m, 8H), 3.15 (d, *J* = 13.2 Hz, 1H), 3.06 – 3.01 (m, 3H), 2.49 (s, 6H) 2.11 (t, *J* = 2.4 Hz, 2H), 1.98 – 1.91 (m, 8H), 1.04 – 0.98 (m, 12H). **<sup>13</sup>C NMR:** (101 MHz, CDCl<sub>3</sub>) δ = 156.4 (C<sub>q</sub>), 143.6 (2C<sub>q</sub>), 136.1 (C<sub>q</sub>), 135.6 (C<sub>q</sub>), 135.2 (C<sub>q</sub>), 134.9 (C<sub>q</sub>), 134.4 (C<sub>q</sub>), 133.3 (C<sub>q</sub>), 129.2 (CH), 128.8 (CH), 128.5 (CH), 128.4 (CH), 128.2 (CH), 128.0 (CH), 122.1 (CH), 77.2 (CH), 76.9 (CH<sub>2</sub>), 76.8 (CH<sub>2</sub>), 74.0 (C<sub>q</sub>), 41.7 (CH<sub>2</sub>), 30.9 (CH<sub>2</sub>), 30.9 (CH<sub>2</sub>), 30.8 (CH<sub>2</sub>), 23.2 (CH<sub>2</sub>), 21.6 (CH<sub>3</sub>), 10.3 (CH<sub>3</sub>). **LC-MS:** *m/z* [M+Na]<sup>+</sup> calculated for C<sub>80</sub>H<sub>106</sub>N<sub>2</sub>NaO<sub>8</sub>S<sub>2</sub>: 1309.73; found: 1309.87. **HR-MS** (ESI) *m/z*: [M+H]<sup>+</sup> calcd. for C<sub>80</sub>H<sub>107</sub>N<sub>2</sub>O<sub>8</sub>S<sub>2</sub> 1287.7469; found 1287.7474.

## 5a

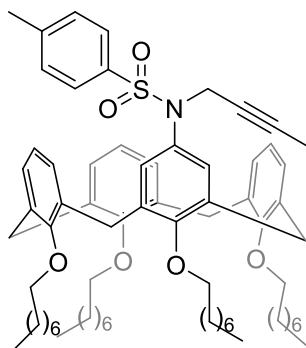

General procedure was followed using **MS1** (229 mg, 0.22 mmol) and 1-bromo-2-butyne (29 μL, 1.5 eq.). Purification by column chromatography on silica gel (*n*-hexane/EtOAc 9:1) yielded **5a** (207 mg, 86 %) as a white solid, **M.p.** = 97 – 98 °C. **<sup>1</sup>H NMR:** (400 MHz, CDCl<sub>3</sub>) δ = 7.60 (d, *J* = 8.2 Hz, 2H), 7.26 (d, *J* = 7.2 Hz, 2H),

6.80 (d,  $J = 7.4$  Hz, 2H), 6.69 (m, 3H), 6.54 – 6.44 (m, 4H), 6.36 (dd,  $J = 7.2$  Hz, 2.0 Hz, 2H), 4.46 (d,  $J = 13.3$  Hz, 2H), 4.41 (d,  $J = 13.3$  Hz, 2H), 4.16 (d,  $J = 2.7$  Hz, 2H), 3.96 (m, 4H), 3.84 (m, 4H), 3.16 (d,  $J = 13.4$  Hz, 2H), 3.07 (d,  $J = 13.4$  Hz, 2H), 2.45 (s, 3H), 1.93 (m, 8H), 1.69 (s, 3H), 1.54 – 1.23 (m, 40H), 0.95 – 0.91 (m, 12H).  $^{13}\text{C}$  NMR: (101 MHz,  $\text{CDCl}_3$ )  $\delta = 157.0$  ( $\text{C}_q$ ), 156.7 ( $\text{C}_q$ ), 156.1 ( $\text{C}_q$ ), 143.0 ( $\text{C}_q$ ), 136.4 ( $\text{C}_q$ ), 136.0 ( $\text{C}_q$ ), 135.6 ( $\text{C}_q$ ), 134.7 ( $\text{C}_q$ ), 134.2 ( $\text{C}_q$ ), 133.5 ( $\text{C}_q$ ), 128.8 (CH), 128.3 (CH), 128.0 (CH), 127.8 (CH), 122.0 (CH), 121.9 (CH), 81.1 ( $\text{C}_q$ ), 75.3 ( $\text{CH}_2$ ), 75.2 ( $\text{CH}_2$ ), 75.1 ( $\text{CH}_2$ ), 73.9 ( $\text{C}_q$ ), 42.0 ( $\text{CH}_2$ ), 32.0 ( $\text{CH}_2$ ), 31.0 ( $\text{CH}_2$ ), 30.9 ( $\text{CH}_2$ ), 30.4 ( $\text{CH}_2$ ), 30.3 ( $\text{CH}_2$ ), 30.3 ( $\text{CH}_2$ ), 30.0 ( $\text{CH}_2$ ), 29.9 ( $\text{CH}_2$ ), 29.7 ( $\text{CH}_2$ ), 29.6 ( $\text{CH}_2$ ), 26.5 ( $\text{CH}_2$ ), 26.3 ( $\text{CH}_2$ ), 26.3 ( $\text{CH}_2$ ), 22.7 ( $\text{CH}_2$ ), 21.6 ( $\text{CH}_3$ ), 14.1 ( $\text{CH}_3$ ), 3.6 ( $\text{CH}_3$ ). **LC-MS:**  $m/z$   $[\text{M}+\text{Na}]^+$  calculated for  $\text{C}_{71}\text{H}_{99}\text{NNaO}_6\text{S}$ : 1116.71; found: 1116.22. **HR-MS** (ESI)  $m/z$ :  $[\text{M}+\text{H}]^+$  calcd. for  $\text{C}_{71}\text{H}_{100}\text{NO}_6\text{S}$  1094.7271; found 1094.7277.

**5b**

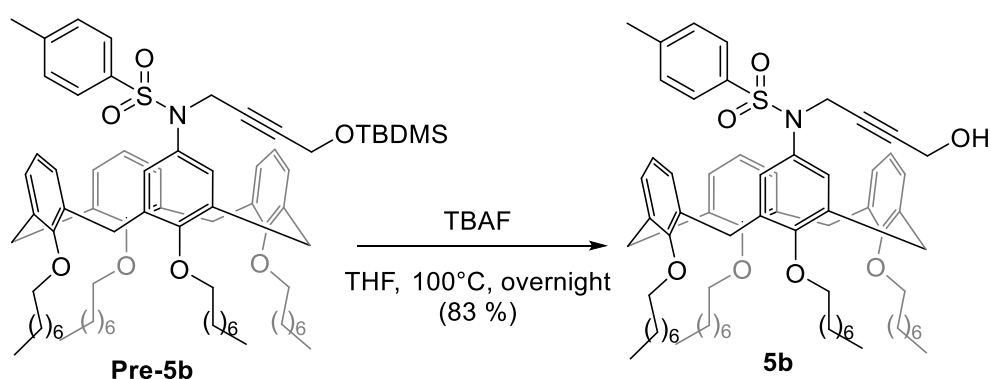

General procedure was followed using **MS1** (229 mg, 0.22 mmol) and [(4-bromobut-2-yn-1-yl)oxy][(t-butyl)dimethylsilane] (75.3 mg, 1.3 eq.). Purification by column chromatography on silica gel (*n*-hexane/EtOAc 9:1) yielded **Pre-5b** (205 mg, 76 %) as a colourless oil. Then the intermediate, under nitrogen atmosphere, was dissolved in THF (4 mL) and TBAF (44 mg, 1.5 eq.) was finally added. The mixture was heated to 100 °C and let stirring overnight. The reaction was monitored by TLC (*n*-Hex:EtOAc 8:2). Once the reaction was completed, water and EtOAc were added to the mixture. The organic phase was separated and washed with water (2x 30 mL) and brine (30 mL), dried over  $\text{Na}_2\text{SO}_4$  and filtered. The crude was purified by column chromatography on silica gel (*n*-Hex:EtOAc 8:2) obtaining the desired product **5b** (157 mg, 83 %) as a colourless oil.  $^1\text{H}$  NMR: (400 MHz,  $\text{CDCl}_3$ )  $\delta = 7.59$  (d,  $J = 8.3$  Hz, 2H), 7.27 (d,  $J = 8.3$  Hz, 2H), 6.71 (d,  $J = 7.4$  Hz, 2H), 6.65 – 6.57 (m, 5H), 6.55 (t,  $J = 7.4$  Hz, 2H), 6.46 (dd,  $J = 7.4$  Hz, 1.8 Hz, 2H), 4.45 (d,  $J = 13.2$  Hz, 2H), 4.41 (d,  $J = 13.2$  Hz, 2H), 4.17 (s, 2H), 4.10 (s, 2H), 3.96 – 3.83 (m, 8H), 3.17 (d,  $J = 13.3$  Hz, 2H), 3.07 (d,  $J = 13.3$  Hz, 2H), 2.46 (s, 3H), 1.99 – 1.86 (m, 8H), 1.61 (bs, 1H), 1.47 – 1.23 (m, 40H), 0.97 – 0.87 (m, 12H).  $^{13}\text{C}$  NMR: (101 MHz,  $\text{CDCl}_3$ )  $\delta = 156.8$  ( $\text{C}_q$ ), 156.6 ( $\text{C}_q$ ), 156.4 ( $\text{C}_q$ ), 143.3 ( $\text{C}_q$ ), 136.4 ( $\text{C}_q$ ), 135.8 ( $\text{C}_q$ ), 135.2 ( $\text{C}_q$ ), 135.1 ( $\text{C}_q$ ), 134.5 ( $\text{C}_q$ ), 133.4 ( $\text{C}_q$ ), 128.9 (CH), 128.4 (CH), 128.3 (CH), 128.2 (CH), 127.9 (CH), 122.0 (CH), 83.2 ( $\text{C}_q$ ), 80.7 ( $\text{C}_q$ ), 75.4 ( $\text{CH}_2$ ), 75.3 ( $\text{CH}_2$ ), 75.2 ( $\text{CH}_2$ ), 51.0 ( $\text{CH}_2$ ), 41.8 ( $\text{CH}_2$ ), 32.0 ( $\text{CH}_2$ ), 31.0 ( $\text{CH}_2$ ), 30.9 ( $\text{CH}_2$ ), 30.4 ( $\text{CH}_2$ ), 30.3 ( $\text{CH}_2$ ), 30.3 ( $\text{CH}_2$ ), 29.9 ( $\text{CH}_2$ ), 29.9 ( $\text{CH}_2$ ), 29.7 ( $\text{CH}_2$ ), 26.4 ( $\text{CH}_2$ ), 26.4 ( $\text{CH}_2$ ), 26.3 ( $\text{CH}_2$ ), 22.7 ( $\text{CH}_2$ ),

21.6 (CH<sub>3</sub>), 14.1 (CH<sub>3</sub>). **LC-MS:**  $m/z$  [M+Na]<sup>+</sup> calculated for C<sub>71</sub>H<sub>99</sub>NNaO<sub>7</sub>S: 1132.70 ; found: 1132.16. **HR-MS** (ESI)  $m/z$ : [M+H]<sup>+</sup> calcd. for C<sub>71</sub>H<sub>100</sub>NO<sub>7</sub>S 1110.7221; found 1110.7216.

### 5c

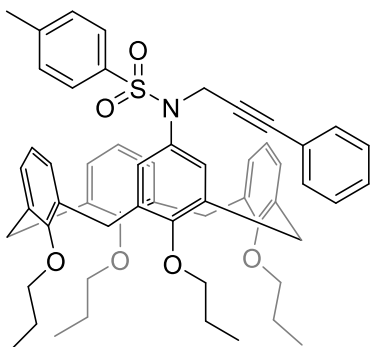

General procedure was followed using **MS2** (236 mg, 0.31 mmol) and (3-bromo-1-propynyl)benzene (91 mg, 1.5 eq.). Purification by column chromatography on silica gel (*n*-hexane/EtOAc 9:1) yielded **5c** (230 mg, 85 %) as a colourless oil. **<sup>1</sup>H NMR:** (400 MHz, CDCl<sub>3</sub>)  $\delta$  = 7.64 (d,  $J$  = 8.3 Hz, 2H), 7.40 – 7.28 (m, 3H), 7.27 – 7.18 (m, 4H), 6.86 – 6.79 (m, 4H), 6.72 (dd,  $J$  = 8.1, 6.8 Hz, 1H), 6.49 (dd,  $J$  = 7.2, 2.2 Hz, 2H), 6.40 – 6.35 (m, 3H), 6.33 (d,  $J$  = 7.4 Hz, 1H), 4.52 – 4.39 (m, 6H), 3.99 – 3.88 (m, 4H), 3.87 – 3.77 (m, 4H), 3.18 (d,  $J$  = 13.3 Hz, 2H), 3.10 (d,  $J$  = 13.3 Hz, 2H), 2.42 (s, 3H), 2.04 – 1.88 (m, 8H), 1.13 – 0.96 (m, 12H). **<sup>13</sup>C NMR:** (101 MHz, CDCl<sub>3</sub>)  $\delta$  = 157.0 (C<sub>q</sub>), 156.8 (C<sub>q</sub>), 156.0 (C<sub>q</sub>), 143.2 (C<sub>q</sub>), 136.3 (C<sub>q</sub>), 136.1 (C<sub>q</sub>), 135.6 (C<sub>q</sub>), 134.6 (C<sub>q</sub>), 134.0 (C<sub>q</sub>), 133.5 (C<sub>q</sub>), 131.5 (CH), 129.1 (CH), 128.4 (CH), 128.3 (CH), 128.3 (CH), 128.2 (CH), 128.2 (CH), 128.1 (CH), 127.9 (CH), 122.8 (C<sub>q</sub>), 122.2 (CH), 121.9 (CH), 85.2 (C<sub>q</sub>), 84.2 (C<sub>q</sub>), 76.9 (CH<sub>2</sub>), 76.8 (CH<sub>2</sub>), 76.7 (CH<sub>2</sub>), 42.2 (CH<sub>2</sub>), 31.0 (4CH<sub>2</sub>), 23.3 (2CH<sub>2</sub>), 23.2 (CH<sub>2</sub>), 21.6 (CH<sub>3</sub>), 10.5 (CH<sub>3</sub>), 10.3 (CH<sub>3</sub>), 10.2 (CH<sub>3</sub>). **LC-MS:**  $m/z$  [M+Na]<sup>+</sup> calculated for C<sub>56</sub>H<sub>61</sub>NNaO<sub>6</sub>S: 898.41; found: 898.12. **HR-MS** (ESI)  $m/z$ : [M+H]<sup>+</sup> calcd. for C<sub>56</sub>H<sub>62</sub>NO<sub>6</sub>S 876.4298; found 876.4294.

### 5d

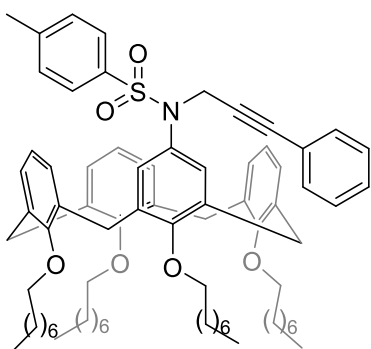

General procedure was followed using **MS1** (229 mg, 0.22 mmol) and (3-bromo-1-propynyl)benzene (64 mg, 1.5 eq.). Purification by column chromatography on silica gel (*n*-hexane/EtOAc 9:1) yielded **5d** (211 mg, 83 %) as a colourless oil. **<sup>1</sup>H NMR:** (400 MHz, CDCl<sub>3</sub>)  $\delta$  = 7.65 (d,  $J$  = 8.3 Hz, 2H), 7.37 – 7.31 (m, 3H), 7.24 – 7.21 (m, 4H), 6.83 (m, 4H), 6.73 (dd,  $J$  = 8.0 Hz, 6.8 Hz, 1H), 6.52 (dd,  $J$  = 7.2 Hz, 2.1 Hz, 2H), 6.40 (dd,  $J$  = 7.7 Hz, 2.2

Hz, 2H), 6.35 (t,  $J = 7.2$  Hz, 2H), 4.54 – 4.40 (m, 6H), 4.03 – 3.92 (m, 4H), 3.90 – 3.86 (m, 4H), 3.19 (d,  $J = 13.3$  Hz, 2H), 3.11 (d,  $J = 13.3$  Hz, 2H), 2.42 (s, 3H), 2.00 – 1.94 (m, 8H), 1.62 – 1.50 (m, 4H), 1.43 – 1.35 (m, 36H), 0.97 – 0.94 (m, 12H).  **$^{13}\text{C}$  NMR:** (101 MHz,  $\text{CDCl}_3$ )  $\delta = 157.0$  ( $\text{C}_q$ ), 156.8 ( $\text{C}_q$ ), 156.1 ( $\text{C}_q$ ), 143.2 ( $\text{C}_q$ ), 136.4 ( $\text{C}_q$ ), 136.1 ( $\text{C}_q$ ), 135.6 ( $\text{C}_q$ ), 134.7 ( $\text{C}_q$ ), 134.1 ( $\text{C}_q$ ), 133.6 ( $\text{C}_q$ ), 131.5 (CH), 129.1 (CH), 128.3 (CH), 128.2 (CH), 128.1 (CH), 127.9 (CH), 122.8 ( $\text{C}_q$ ), 122.2 (CH), 122.0 (CH), 85.3 ( $\text{C}_q$ ), 84.2 ( $\text{C}_q$ ), 75.4 ( $\text{CH}_2$ ), 75.3 ( $\text{CH}_2$ ), 42.2 ( $\text{CH}_2$ ), 32.1 ( $\text{CH}_2$ ), 31.0 ( $\text{CH}_2$ ), 30.4 (3 $\text{CH}_2$ ), 30.0 ( $\text{CH}_2$ ), 29.9 ( $\text{CH}_2$ ), 29.7 (2 $\text{CH}_2$ ), 26.5 ( $\text{CH}_2$ ), 26.4 ( $\text{CH}_2$ ), 26.3 ( $\text{CH}_2$ ), 22.6 ( $\text{CH}_2$ ), 21.6 ( $\text{CH}_3$ ), 14.3 ( $\text{CH}_3$ ). **LC-MS:**  $m/z$   $[\text{M}+\text{H}]^+$  calculated for  $\text{C}_{76}\text{H}_{101}\text{NO}_6\text{S}^+$ : 1157.75 ; found: 1157.70. **HR-MS (ESI)**  $m/z$ :  $[\text{M}+\text{H}]^+$  calcd. for  $\text{C}_{76}\text{H}_{102}\text{NO}_6\text{S}$  1156.7428; found 1156.7422.

## 5e

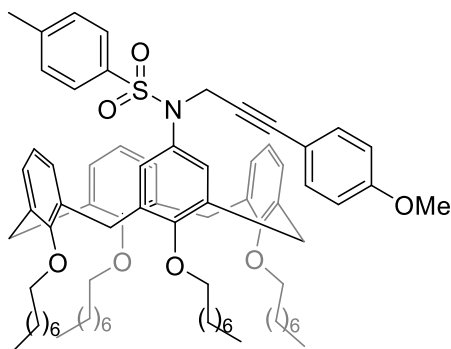

General procedure was followed using **MS1** (229 mg, 0.22 mmol) and (3-bromo-1-propynyl)4-methoxybenzene (74 mg, 1.5 eq.). Purification by column chromatography on silica gel (*n*-hexane/EtOAc 9:1) yielded **5e** (217 mg, 83 %) as a yellowish oil.  **$^1\text{H}$  NMR:** (400 MHz,  $\text{CDCl}_3$ )  $\delta = 7.62$  (d,  $J = 8.3$  Hz, 2H), 7.20 (d,  $J = 8.3$  Hz, 2H), 7.14 (d,  $J = 8.8$  Hz, 2H), 6.87 – 6.79 (m, 6H), 6.75 – 6.67 (m, 1H), 6.46 (t,  $J = 4.4$  Hz, 2H), 6.33 (d,  $J = 5.0$  Hz, 4H), 4.49 – 4.36 (m, 6H), 4.02 – 3.88 (m, 4H), 3.87 – 3.78 (m, 7H), 3.16 (d,  $J = 13.4$  Hz, 2H), 3.07 (d,  $J = 13.4$  Hz, 2H), 2.40 (s, 3H), 2.00 – 1.84 (m, 8H), 1.50 – 1.25 (m, 40H), 0.99 – 0.87 (m, 12H).  **$^{13}\text{C}$  NMR:** (101 MHz,  $\text{CDCl}_3$ )  $\delta = 159.6$  ( $\text{C}_q$ ), 157.0 ( $\text{C}_q$ ), 156.8 ( $\text{C}_q$ ), 156.0 ( $\text{C}_q$ ), 143.0 ( $\text{C}_q$ ), 136.3 ( $\text{C}_q$ ), 136.1 ( $\text{C}_q$ ), 135.7 ( $\text{C}_q$ ), 134.6 ( $\text{C}_q$ ), 134.0 ( $\text{C}_q$ ), 133.5 ( $\text{C}_q$ ), 133.0 (CH), 129.0 (CH), 128.4 (CH), 128.3 (CH), 128.2 (CH), 128.0 (CH), 127.8 (CH), 122.1 (CH), 121.9 (CH), 114.9 ( $\text{C}_q$ ), 113.8 (CH), 85.1 ( $\text{C}_q$ ), 82.7 ( $\text{C}_q$ ), 75.3 ( $\text{CH}_2$ ), 75.2 ( $\text{CH}_2$ ), 75.2 ( $\text{CH}_2$ ), 55.3 ( $\text{CH}_3$ ), 42.3 ( $\text{CH}_2$ ), 32.0 ( $\text{CH}_2$ ), 31.0 ( $\text{CH}_2$ ), 30.9 ( $\text{CH}_2$ ), 30.4 ( $\text{CH}_2$ ), 30.3 (2 $\text{CH}_2$ ), 30.0 ( $\text{CH}_2$ ), 29.9 ( $\text{CH}_2$ ), 29.7 ( $\text{CH}_2$ ), 29.6 ( $\text{CH}_2$ ), 26.5 ( $\text{CH}_2$ ), 26.3 ( $\text{CH}_2$ ), 22.8 ( $\text{CH}_2$ ), 21.6 ( $\text{CH}_3$ ), 14.1 ( $\text{CH}_3$ ). **LC-MS:**  $m/z$   $[\text{M}+\text{H}]^+$  calculated for  $\text{C}_{77}\text{H}_{106}\text{NO}_7\text{S}$ : 1186.76 ; found: 1186.54. **HR-MS (ESI)**  $m/z$ :  $[\text{M}+\text{H}]^+$  calcd. for  $\text{C}_{77}\text{H}_{104}\text{NO}_7\text{S}$  1186.7534; found 1186.7539.

**5f**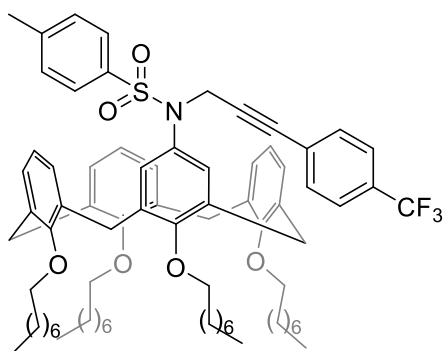

General procedure was followed using **MS1** (229 mg, 0.22 mmol) and (3-bromo-1-propynyl)4-(trifluoromethyl)benzene (87 mg, 1.5 eq.). Purification by column chromatography on silica gel (*n*-hexane/EtOAc 9:1) yielded **5f** (202 mg, 75 %) as a colourless oil. **<sup>1</sup>H NMR:** (400 MHz, CDCl<sub>3</sub>) δ = 7.61 (d, *J* = 8.3 Hz, 2H), 7.56 (d, *J* = 8.3 Hz, 2H), 7.27 (d, *J* = 8.3 Hz, 2H), 7.21 (d, *J* = 8.3 Hz, 2H), 6.76 (d, *J* = 7.5 Hz, 2H), 6.72 (s, 2H), 6.69 – 6.63 (m, 1H), 6.53 (dd, *J* = 7.4 Hz, 1.8 Hz, 2H), 6.40 (dd, *J* = 7.4 Hz, 1.8 Hz, 2H), 6.34 (t, *J* = 7.5 Hz, 2H), 4.50 – 4.38 (m, 6H), 3.99 – 3.80 (m, 8H), 3.16 (d, *J* = 13.3 Hz, 2H), 3.08 (d, *J* = 13.3 Hz, 2H), 2.41 (s, 3H), 2.00 – 1.86 (m, 8H), 1.48 – 1.26 (m, 40 H), 0.99 – 0.86 (m, 12H). **<sup>13</sup>C NMR:** (101 MHz, CDCl<sub>3</sub>) δ = 156.9 (C<sub>q</sub>), 156.7 (C<sub>q</sub>), 156.2 (C<sub>q</sub>), 143.2 (C<sub>q</sub>), 136.4 (C<sub>q</sub>), 136.0 (C<sub>q</sub>), 135.4 (C<sub>q</sub>), 134.9 (C<sub>q</sub>), 134.2 (C<sub>q</sub>), 133.5 (C<sub>q</sub>), 131.8 (CH), 129.9 (C<sub>q</sub>), 129.1 (CH), 128.3 (CH), 128.2 (CH), 128.1 (CH), 128.0 (CH), 127.8 (CH), 126.5 (C<sub>q</sub>), 125.1 (q, *J*<sub>C-F</sub> = 3.8 Hz, CH), 124.0 (d, *J*<sub>C-F</sub> = 272 Hz, C<sub>q</sub>), 122.1 (CH), 121.9 (CH), 86.9 (C<sub>q</sub>), 83.8 (C<sub>q</sub>), 75.4 (CH<sub>2</sub>), 75.3 (CH<sub>2</sub>), 42.2 (CH<sub>2</sub>), 32.0 (CH<sub>2</sub>), 31.0 (CH<sub>2</sub>), 30.4 (CH<sub>2</sub>), 30.3 (CH<sub>2</sub>), 30.0 (2CH<sub>2</sub>), 29.9 (CH<sub>2</sub>), 29.7 (CH<sub>2</sub>), 29.6 (CH<sub>2</sub>), 26.4 (CH<sub>2</sub>), 26.3 (CH<sub>2</sub>), 22.7 (CH<sub>2</sub>), 21.6 (CH<sub>3</sub>), 14.1 (CH<sub>3</sub>). **<sup>19</sup>F NMR:** (565 MHz, CDCl<sub>3</sub>) δ = - 62.7. **ESI-MS:** *m/z* [M+H<sub>3</sub>O]<sup>+</sup> calculated for C<sub>77</sub>H<sub>103</sub>F<sub>3</sub>NO<sub>7</sub>S: 1242.74; found: 1242.86. **HR-MS (ESI) *m/z*:** [M+H]<sup>+</sup> calcd. for C<sub>77</sub>H<sub>101</sub>F<sub>3</sub>NO<sub>6</sub>S 1224.7302; found 1224.7309.

**5g**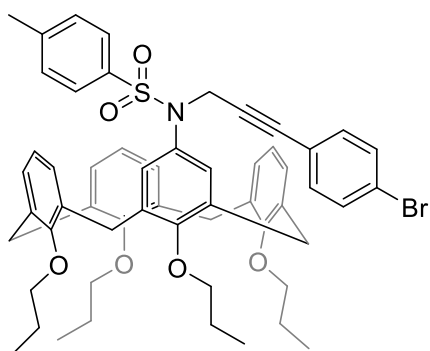

General procedure was followed using **MS2** (236 mg, 0.31 mmol) and 1-bromo-4-(3-bromoprop-1-yn-1-yl)benzene (129 mg, 1.5 eq.). Purification by column chromatography on silica gel (*n*-hexane/EtOAc 9:1) yielded **5g** (243 mg, 82 %) as a yellowish solid, **M.p.** = 94 – 95 °C. **<sup>1</sup>H NMR:** (400 MHz, CDCl<sub>3</sub>) δ = 7.60 (d, *J* = 8.4 Hz, 2H), 7.43 (d, *J* = 8.6 Hz, 2H), 7.21 (d, *J* = 8.4 Hz, 2H), 7.03 (d, *J* = 8.6 Hz, 2H), 6.78 (d, *J* = 7.2 Hz, 2H), 6.72 (s, 2H), 6.71 – 6.63 (m, 1H), 6.51 (dd, *J* = 7.0 Hz, 2.4 Hz, 2H), 6.39 – 6.30 (m, 4H), 4.50 – 4.35 (m, 6H), 3.95

– 3.76 (m, 8H), 3.16 (d,  $J = 13.3$  Hz, 2H), 3.07 (d,  $J = 13.3$  Hz, 2H), 2.41 (s, 3H), 2.02 – 1.86 (m, 8H), 1.06 – 0.94 (m, 12H).  $^{13}\text{C NMR}$ : (101 MHz,  $\text{CDCl}_3$ )  $\delta = 156.9$  ( $\text{C}_q$ ), 156.7 ( $\text{C}_q$ ), 156.1 ( $\text{C}_q$ ), 143.2 ( $\text{C}_q$ ), 136.3 ( $\text{C}_q$ ), 136.0 ( $\text{C}_q$ ), 135.5 ( $\text{C}_q$ ), 134.8 ( $\text{C}_q$ ), 134.1 ( $\text{C}_q$ ), 133.4 ( $\text{C}_q$ ), 132.9 (CH), 131.4 (CH), 129.1 (CH), 128.3 (2CH), 128.1 (CH), 128.1 (CH), 127.8 (CH), 122.5 ( $\text{C}_q$ ), 122.1 (CH), 121.9 (CH), 121.7 ( $\text{C}_q$ ), 85.4 ( $\text{C}_q$ ), 84.1 ( $\text{C}_q$ ), 76.8 ( $\text{CH}_2$ ), 76.8 (2 $\text{CH}_2$ ), 76.8 ( $\text{CH}_2$ ), 42.2 ( $\text{CH}_2$ ), 31.0 (4 $\text{CH}_2$ ), 23.3 ( $\text{CH}_2$ ), 23.2 (2 $\text{CH}_2$ ), 21.6 ( $\text{CH}_3$ ), 10.4 ( $\text{CH}_3$ ), 10.3 ( $\text{CH}_3$ ), 10.2 ( $\text{CH}_3$ ). **LC-MS**:  $m/z$  [ $\text{M}+\text{NH}_4$ ] $^+$  calculated for  $\text{C}_{56}\text{H}_{64}\text{BrN}_2\text{O}_6\text{S}$ : 973.36; found: 973.56. **HR-MS**:  $m/z$  [ $\text{M}+\text{H}$ ] $^+$  calculated for  $\text{C}_{56}\text{H}_{61}\text{BrNO}_6\text{S}$ : 954.3403; found: 954.3397.

## 5h

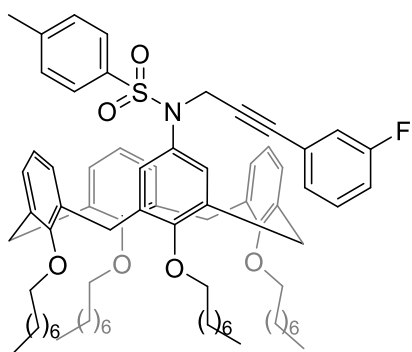

General procedure was followed using **MS1** (229 mg, 0.22 mmol) and (3-bromo-1-propynyl)3-fluorobenzene (70 mg, 1.5 eq.). Purification by column chromatography on silica gel (*n*-hexane/EtOAc 9:1) yielded **5h** (207 mg, 80 %) as a colourless oil.  $^1\text{H NMR}$ : (400 MHz,  $\text{CDCl}_3$ )  $\delta = 7.60$  (d,  $J = 8.3$  Hz, 2H), 7.28 – 7.26 (m, 1H), 7.22 (d,  $J = 8.3$  Hz, 2H), 7.05 (td,  $J = 8.4$  Hz, 2.8 Hz, 1H), 6.98 (d,  $J = 7.7$  Hz, 1H), 6.81 (dt,  $J = 9.4$  Hz, 1.5 Hz, 1H), 6.73 (d,  $J = 7.3$  Hz, 2H), 6.70 (s, 2H), 6.67 – 6.61 (m, 1H), 6.55 (d,  $J = 7.3$  Hz, 2H), 6.42 (d,  $J = 7.5$  Hz, 2H), 6.37 (t,  $J = 7.3$  Hz, 2H), 4.50 – 4.35 (m, 6H), 3.98 – 3.81 (m, 8H), 3.16 (d,  $J = 13.3$  Hz, 2H), 3.08 (d,  $J = 13.3$  Hz, 2H), 2.42 (s, 3H), 2.01 – 1.84 (m, 8H), 1.48 – 1.25 (m, 40H), 0.99 – 0.86 (m, 12H).  $^{13}\text{C NMR}$ : (101 MHz,  $\text{CDCl}_3$ )  $\delta = 162.4$  (d,  $J_{\text{C-F}} = 247$  Hz,  $\text{C}_q$ ), 156.8 ( $\text{C}_q$ ), 156.7 ( $\text{C}_q$ ), 156.3 ( $\text{C}_q$ ), 143.3 ( $\text{C}_q$ ), 136.4 ( $\text{C}_q$ ), 135.9 ( $\text{C}_q$ ), 135.3 ( $\text{C}_q$ ), 135.0 ( $\text{C}_q$ ), 134.3 ( $\text{C}_q$ ), 133.6 ( $\text{C}_q$ ), 129.7 (d,  $J_{\text{C-F}} = 8.4$  Hz, CH), 129.1 (CH), 128.3 (CH), 128.2 (CH), 128.2 (CH), 128.1 (CH), 127.9 (CH), 127.3 (d,  $J_{\text{C-F}} = 3.3$  Hz, CH), 124.6 (d,  $J_{\text{C-F}} = 9.8$  Hz,  $\text{C}_q$ ), 122.1 (CH), 121.9 (CH), 118.3 (d,  $J_{\text{C-F}} = 23.0$  Hz, CH), 118.6 (d,  $J_{\text{C-F}} = 21.2$  Hz, CH), 85.2 ( $\text{C}_q$ ), 83.9 (d,  $J_{\text{C-F}} = 3.3$  Hz,  $\text{C}_q$ ), 75.4 ( $\text{CH}_2$ ), 75.3 ( $\text{CH}_2$ ), 75.2 ( $\text{CH}_2$ ), 42.1 ( $\text{CH}_2$ ), 32.0 ( $\text{CH}_2$ ), 31.0 ( $\text{CH}_2$ ), 30.4 ( $\text{CH}_2$ ), 30.4 ( $\text{CH}_2$ ), 30.3 ( $\text{CH}_2$ ), 30.0 ( $\text{CH}_2$ ), 29.9 ( $\text{CH}_2$ ), 29.7 ( $\text{CH}_2$ ), 26.4 ( $\text{CH}_2$ ), 26.3 ( $\text{CH}_2$ ), 26.3 ( $\text{CH}_2$ ), 22.7 ( $\text{CH}_2$ ), 21.5 ( $\text{CH}_3$ ), 14.1 ( $\text{CH}_3$ ).  $^{19}\text{F NMR}$ : (565 MHz,  $\text{CDCl}_3$ )  $\delta = -62.5$ . **LC-MS**:  $m/z$  [ $\text{M}+\text{Na}$ ] $^+$  calculated for  $\text{C}_{76}\text{H}_{100}\text{FNNaO}_6\text{S}$ : 1196.72; found: 1196.45. **HR-MS** (ESI)  $m/z$ : [ $\text{M}+\text{H}$ ] $^+$  calcd. for  $\text{C}_{76}\text{H}_{101}\text{FNO}_6\text{S}$  1174.7334; found 1174.7338.

**5i**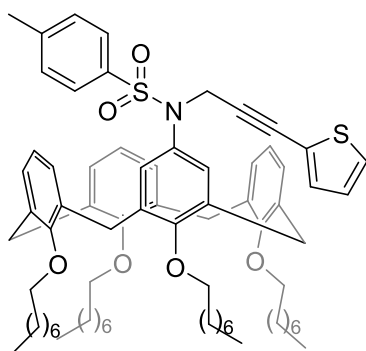

General procedure was followed using **MS1** (229 mg, 0.22 mmol) and 2-(3-bromo-1-propynyl)thiophene (66 mg, 1.5 eq.). Purification by column chromatography on silica gel (*n*-hexane/EtOAc 9:1) yielded **5i** (194 mg, 76 %) as a yellowish solid, **M.p.** = 122 – 123 °C. **<sup>1</sup>H NMR:** (400 MHz, CDCl<sub>3</sub>) δ = 7.61 (d, *J* = 8.3 Hz, 2H), 7.26 (dd, *J* = 5.1 Hz, 1.6 Hz, 1H), 7.22 (d, *J* = 8.3 Hz, 2H), 7.05 (dd, *J* = 3.6 Hz, 1.4 Hz, 1H), 6.99 (dd, *J* = 5.1 Hz, 3.5 Hz, 1H), 6.80 (d, *J* = 7.5 Hz, 2H), 6.74 (s, 2H), 6.71 – 6.65 (m, 1H), 6.53 – 6.47 (m, 2H), 6.42 – 6.35 (m, 4H), 4.50 – 4.36 (m, 6H), 3.99 – 3.89 (m, 4H), 3.88 – 3.79 (m, 4H), 3.16 (d, *J* = 13.3 Hz, 2H), 3.08 (d, *J* = 13.3 Hz, 2H), 2.40 (s, 3H), 2.00 – 1.85 (m, 8H), 1.49 – 1.26 (m, 40H), 0.98 – 0.88 (m, 12H). **<sup>13</sup>C NMR:** (101 MHz, CDCl<sub>3</sub>) δ = 157.0 (C<sub>q</sub>), 156.8 (C<sub>q</sub>), 156.1 (C<sub>q</sub>), 143.2 (C<sub>q</sub>), 136.2 (C<sub>q</sub>), 136.1 (C<sub>q</sub>), 135.6 (C<sub>q</sub>), 134.7 (C<sub>q</sub>), 134.1 (C<sub>q</sub>), 133.5 (C<sub>q</sub>), 132.0 (CH), 129.1 (CH), 128.3 (CH), 128.2 (CH), 128.1 (CH), 128.1 (CH), 127.9 (CH), 127.0 (CH), 126.8 (CH), 122.7 (C<sub>q</sub>), 122.1 (CH), 121.9 (CH), 88.1 (C<sub>q</sub>), 78.5 (C<sub>q</sub>), 75.3 (CH<sub>2</sub>), 75.2 (CH<sub>2</sub>), 42.4 (CH<sub>2</sub>), 32.0 (CH<sub>2</sub>), 31.0 (CH<sub>2</sub>), 30.9 (CH<sub>2</sub>), 30.4 (CH<sub>2</sub>), 30.4 (CH<sub>2</sub>), 30.3 (CH<sub>2</sub>), 30.0 (CH<sub>2</sub>), 29.9 (CH<sub>2</sub>), 29.7 (CH<sub>2</sub>), 29.6 (CH<sub>2</sub>), 26.5 (CH<sub>2</sub>), 26.3 (CH<sub>2</sub>), 26.3 (CH<sub>2</sub>), 22.7 (CH<sub>2</sub>), 21.6 (CH<sub>3</sub>), 14.1 (CH<sub>3</sub>). **LC-MS:** *m/z* [M+NH<sub>4</sub>]<sup>+</sup> calculated for C<sub>74</sub>H<sub>103</sub>N<sub>2</sub>O<sub>6</sub>S<sub>2</sub>: 1179.73; found: 1179.52. **HR-MS** (ESI) *m/z*: [M+H]<sup>+</sup> calcd. for C<sub>74</sub>H<sub>100</sub>NO<sub>6</sub>S<sub>2</sub> 1162.6992; found 1162.6988.

**5j**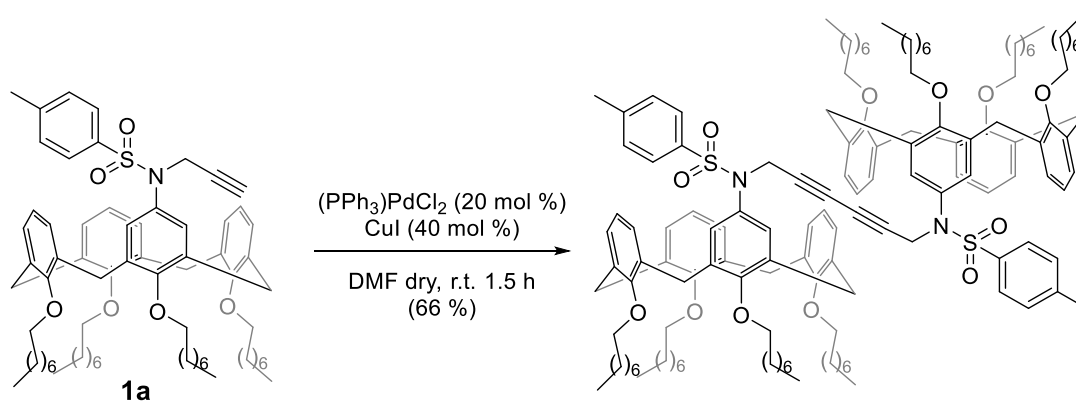

In a two-necked round-bottom flask, under nitrogen atmosphere, bis(triphenylphosphine)Pd(II) dichloride (0.2 eq.), CuI (0.4 eq.) Et<sub>3</sub>N (1.5 eq.) were added to a solution of **1a** (100 mg, 0.093 mmol) in DMF (4 mL). The was le stirring at r.t. for 1.5 h. The reaction was monitored by TLC (*n*-Hex:EtOAc 9:1). Once the reaction was completed, water and EtOAc were added to the mixture. The organic phase was separated and washed with water (2x 30 mL) and brine (30 mL), dried over Na<sub>2</sub>SO<sub>4</sub> and filtered. Purified by column chromatography on

silica gel (n-Hex:EtOAc 9:1), yielded **5j** (132 mg, 66 %) as a colourless oil. **<sup>1</sup>H NMR**: (400 MHz, CDCl<sub>3</sub>) δ = 7.59 (d, *J* = 8.1 Hz, 4H), 7.28 (d, *J* = 8.2 Hz, 4H), 6.79 (d, *J* = 7.5 Hz, 4H), 6.70 – 6.61 (m, 6H), 6.58 – 6.48 (m, 8H), 6.36 (dd, *J* = 7.2, 2.1 Hz, 4H), 4.45 (d, *J* = 13.2 Hz, 4H), 4.40 (d, *J* = 13.2 Hz, 4H), 4.31 (s, 4H), 3.97 – 3.77 (m, 16H), 3.16 (d, *J* = 13.3 Hz, 4H), 3.07 (d, *J* = 13.3 Hz, 4H), 2.44 (s, 6H), 1.99 – 1.88 (m, 16H), 1.48 – 1.25 (m, 80H), 0.99 – 0.88 (m, 24H). **<sup>13</sup>C NMR**: (101 MHz, CDCl<sub>3</sub>) δ = 156.9 (C<sub>q</sub>), 156.8 (C<sub>q</sub>), 156.1 (C<sub>q</sub>), 143.6 (C<sub>q</sub>), 136.3 (C<sub>q</sub>), 135.8 (C<sub>q</sub>), 135.6 (C<sub>q</sub>), 134.7 (C<sub>q</sub>), 134.00 (C<sub>q</sub>), 133.1 (C<sub>q</sub>), 129.2 (CH), 128.3 (CH), 128.2 (CH), 128.0 (CH), 127.9 (CH), 122.2 (CH), 121.9 (CH), 75.4 (CH<sub>2</sub>), 75.3 (CH<sub>2</sub>), 73.8 (C<sub>q</sub>), 69.5 (C<sub>q</sub>), 42.3 (CH<sub>2</sub>), 32.0 (CH<sub>2</sub>), 31.0 (CH<sub>2</sub>), 30.9 (CH<sub>2</sub>), 30.4 (CH<sub>2</sub>), 30.3 (CH<sub>2</sub>), 30.0 (CH<sub>2</sub>), 29.9 (CH<sub>2</sub>), 29.7 (CH<sub>2</sub>), 29.7 (CH<sub>2</sub>), 29.6 (CH<sub>2</sub>), 26.5 (CH<sub>2</sub>), 26.3 (CH<sub>2</sub>), 26.2 (CH<sub>2</sub>), 22.7 (CH<sub>2</sub>), 21.6 (CH<sub>3</sub>), 14.1 (CH<sub>3</sub>). **LC-MS**: *m/z* [M+2K]<sup>2+</sup> calculated for C<sub>140</sub>H<sub>192</sub>K<sub>2</sub>N<sub>2</sub>O<sub>12</sub>S<sub>2</sub>: 1117.65; found: 1117.47. **HR-MS** (ESI) *m/z*: [M+2K]<sup>+</sup> calcd. for C<sub>140</sub>H<sub>192</sub>K<sub>2</sub>N<sub>2</sub>O<sub>12</sub>S<sub>2</sub>: 1117.6595; found: 1117.6590.

**5k**

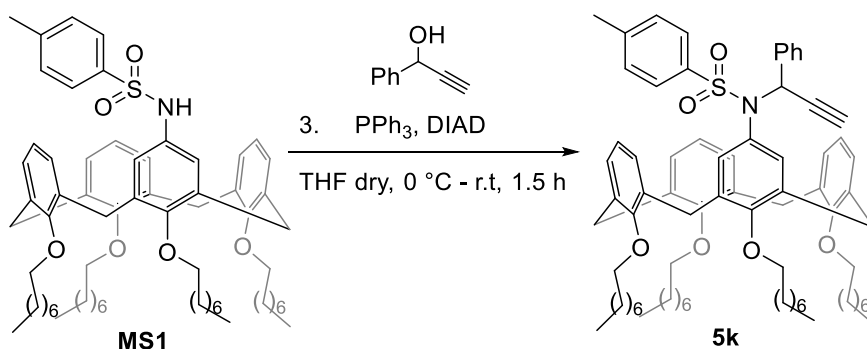

**MS1** (229 mg, 0.22 mmol) was dissolved in dry THF (2mL) along with PPh<sub>3</sub> (69 mg, 1.2 eq.), DIAD (53 mg, 1.2 eq.) and 1-phenylprop-2-yn-1-ol (34 mg, 1.2 eq.). The mixture was let stirring at r.t. for 2.5 h. The reaction was monitored by TLC (n-Hex:EtOAc 9:1). Once the reaction was completed, water and EtOAc was added to the mixture. The organic phase was separated and washed with water (2x 30 mL) and brine (30 mL), dehydrated with Na<sub>2</sub>SO<sub>4</sub> and the solvent removed under low pressure. Purification by column chromatography on silica gel (n-Hex:EtOAc 97:3), yielded **5k** (221 mg, 87 %) as a white solid. **M.p.** = 104 – 105 °C. **<sup>1</sup>H NMR**: (400 MHz, CDCl<sub>3</sub>) δ = 7.77 (d, *J* = 8.3 Hz, 2H), 7.52 – 7.45 (m, 2H), 7.36 – 7.29 (m, 5H), 7.11 – 7.04 (m, 2H), 6.88 (t, *J* = 7.3 Hz, 1H), 6.83 (d, *J* = 2.6 Hz, 1H), 6.56 – 6.50 (m, 2H), 6.27 (t, *J* = 7.4 Hz, 1H), 6.20– 6.14 (m, 3H), 6.05 (dd, *J* = 7.6 Hz, 2.0 Hz, 1H), 5.30 (t, *J* = 4.4 Hz, 1H), 4.46 – 4.38 (m, 2H), 4.30 (d, *J* = 13.3 Hz, 1H), 4.25 (d, *J* = 13.3 Hz, 1H), 4.05 – 3.95 (m, 4H), 3.73 – 3.59 (m, 4H), 3.13 (d, *J* = 13.3 Hz, 2H), 2.90 (d, *J* = 13.3 Hz, 1H), 2.86 (d, *J* = 13.3 Hz, 1H), 2.48 (m, 4H), 1.99 – 1.77 (m, 8H), 1.56 – 1.48 (m, 4H), 1.44 – 1.18 (m, 36H), 0.99 – 0.86 (m, 12H). **<sup>13</sup>C NMR**: (101 MHz, CDCl<sub>3</sub>) δ = 158.0 (C<sub>q</sub>), 157.7 (C<sub>q</sub>), 155.2 (C<sub>q</sub>), 143.3 (C<sub>q</sub>), 137.0 (C<sub>q</sub>), 136.9 (C<sub>q</sub>), 136.8 (C<sub>q</sub>), 136.7 (C<sub>q</sub>), 136.4 (C<sub>q</sub>), 135.9 (C<sub>q</sub>), 133.5 (C<sub>q</sub>), 133.3 (C<sub>q</sub>), 133.0 (CH), 132.9 (C<sub>q</sub>), 132.7 (C<sub>q</sub>), 130.7 (CH), 129.1 (CH), 128.8 (CH), 128.8 (CH), 128.7 (CH), 128.3 (CH), 128.2 (CH), 128.1 (CH), 127.5 (CH), 127.4 (CH), 127.3 (CH), 122.0 (CH), 121.9 (CH), 121.8 (CH), 77.2 (CH), 75.3 (C<sub>q</sub> + CH<sub>2</sub>), 75.2 (CH<sub>2</sub>), 75.1 (CH<sub>2</sub>), 75.0 (CH<sub>2</sub>), 54.9 (CH), 32.1 (CH<sub>2</sub>), 32.0 (CH<sub>2</sub>), 31.0 (CH<sub>2</sub>), 30.7 (CH<sub>2</sub>), 30.6 (CH<sub>2</sub>), 30.5 (CH<sub>2</sub>), 30.4 (CH<sub>2</sub>), 30.2 (CH<sub>2</sub>),



30.1 (CH<sub>2</sub>), 30.0 (CH<sub>2</sub>), 29.8 (CH<sub>2</sub>), 29.7 (CH<sub>2</sub>), 29.5 (CH<sub>2</sub>), 26.6 (CH<sub>2</sub>), 26.5 (CH<sub>2</sub>), 26.1 (CH<sub>2</sub>), 22.8 (CH<sub>2</sub>), 22.7 (CH<sub>2</sub>), 22.7 (CH<sub>2</sub>), 21.7 (CH<sub>3</sub>), 14.1 (CH<sub>3</sub>). **ESI-MS**:  $m/z$  [M+NH<sub>4</sub>]<sup>+</sup> calculated for C<sub>76</sub>H<sub>105</sub>N<sub>2</sub>O<sub>6</sub>S: 1173.77; found: 1173.64. **HR-MS** (ESI)  $m/z$ : [M+H]<sup>+</sup> calcd. for C<sub>76</sub>H<sub>102</sub>NO<sub>6</sub>S<sub>2</sub> 1156.7428; found 1156.7422.

## 7a

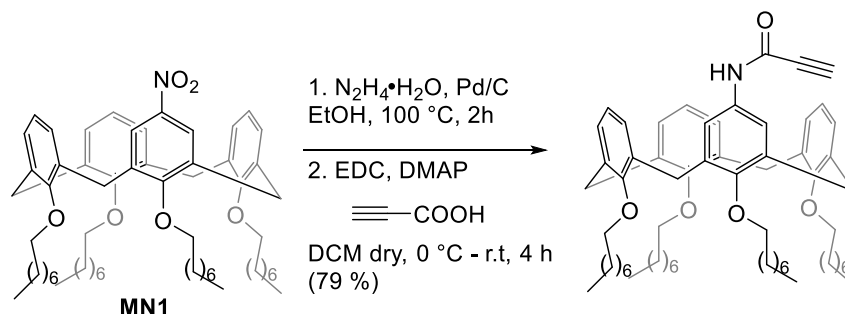

In a two-necked round bottom flask, under nitrogen atmosphere, Pd/C (cat. amount) and hydrazine monohydrate (60 eq.) were added to a suspension of **MN1** (200 mg, 0.22 mmol) in EtOH (20 mL). The reaction was heated to 100 °C and let react under reflux for 2 h. The reaction was monitored by TLC (n-Hex:EtOAc 9:1). Once the reaction was completed, the mixture was cooled to r.t. and filtered through celite and the solvent removed under low pressure. Water and DCM were added to the residue and the organic phase was recovered, washed with water (2 x 30 mL) and brine (30 mL), dried over Na<sub>2</sub>SO<sub>4</sub>, filtered and the solvent removed under low pressure. The crude was used in the next step without further purification. The mono-ammino derivative was then dissolved in dry DCM, under nitrogen atmosphere, and EDC (1.3 eq.), DMAP (cat.) and 3-propionic acid (1.3 eq.) were added at 0 °C. The mixture was let warm up at r.t. and stirred for 4 h. The reaction was monitored by TLC (n-Hex:EtOAc 9:1). Once the reaction was completed, water was added to the mixture. The organic phase was separated and washed with water (2x 30 mL) and brine (30 mL), dried over Na<sub>2</sub>SO<sub>4</sub> and the solvent removed under low pressure. The crude was purified by column chromatography on silica gel (n-Hex:EtOAc 9:1), obtaining the desired substrate **7a** (163 mg, 79 %) as a colourless oil. **<sup>1</sup>H NMR**: (400 MHz, CDCl<sub>3</sub>) δ = 7.00 (s, 1H), 6.84 – 6.77 (m, 4H), 6.72 (t, *J* = 7.4 Hz, 2H), 6.52 (s, 2H), 6.47 (s, 3H), 4.46 (d, *J* = 13.3 Hz, 2H), 4.44 (d, *J* = 13.3 Hz, 2H), 3.97 – 3.94 (m, 2H), 3.82 (q, *J* = 7.0 Hz, 4H), 3.18 (d, *J* = 13.2 Hz, 2H), 3.14 (d, *J* = 13.2 Hz, 2H), 2.84 (s, 1H), 1.97 – 1.84 (m, 8H), 1.55 – 1.24 (m, 40H), 0.96 – 0.88 (m, 12H). **<sup>13</sup>C NMR**: (101 MHz, CDCl<sub>3</sub>) δ = 157.1 (C<sub>q</sub>), 156.3 (C<sub>q</sub>), 153.9 (C<sub>q</sub>), 149.0 (C<sub>q</sub>), 135.9 (C<sub>q</sub>), 135.5 (C<sub>q</sub>), 135.4 (C<sub>q</sub>), 134.6 (C<sub>q</sub>), 130.5 (C<sub>q</sub>), 128.6 (CH), 128.4 (CH), 127.8 (CH), 122.0 (CH), 121.4 (CH), 120.1 (CH), 76.8 (CH), 75.2 (CH<sub>2</sub>), 75.2 (CH<sub>2</sub>), 75.2 (CH<sub>2</sub>), 73.3 (C<sub>q</sub>), 32.0 (CH<sub>2</sub>), 31.1 (CH<sub>2</sub>), 31.0 (CH<sub>2</sub>), 30.4 (CH<sub>2</sub>), 30.3 (CH<sub>2</sub>), 30.3 (CH<sub>2</sub>), 30.0 (CH<sub>2</sub>), 29.9 (CH<sub>2</sub>), 29.9 (CH<sub>2</sub>), 29.7 (CH<sub>2</sub>), 29.6 (CH<sub>2</sub>), 29.6 (CH<sub>2</sub>), 26.5 (CH<sub>2</sub>), 26.4 (CH<sub>2</sub>), 26.2 (CH<sub>2</sub>), 22.7 (CH<sub>2</sub>), 22.7 (CH<sub>2</sub>), 14.1 (CH<sub>3</sub>). **LC-MS**:  $m/z$  [M+NH<sub>4</sub>]<sup>+</sup> calculated for C<sub>63</sub>H<sub>93</sub>N<sub>2</sub>O<sub>5</sub>: 957.71; found: 957.45. **HR-MS** (ESI)  $m/z$ : [M+H]<sup>+</sup> calcd. for C<sub>63</sub>H<sub>90</sub>NO<sub>5</sub> 940.6819; found 940.6816.

**7b**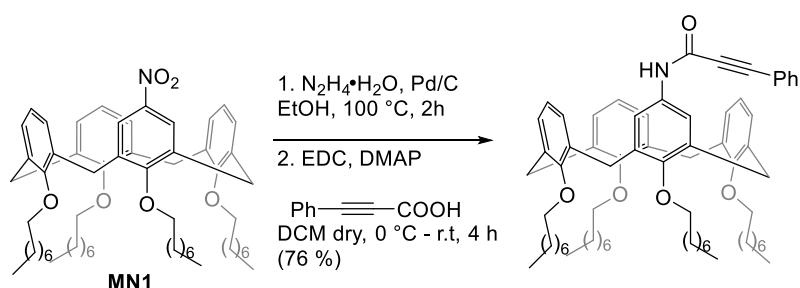

In a two-necked round bottom flask, under nitrogen atmosphere, Pd/C (cat. amount) and hydrazine monohydrate (60 eq.) were added to a suspension of **MN1** (200 mg, 0.22 mmol) in EtOH (20 mL). The reaction was heated to 100 °C and let react under reflux for 2 h. The reaction was monitored by TLC (n-Hex:EtOAc 9:1). Once the reaction was completed, the mixture was cooled to r.t. and filtered through celite and the solvent removed under low pressure. Water and DCM were added to the residue and the organic phase was recovered, washed with water (2 x 30 mL) and brine (30 mL), dehydrated with  $\text{Na}_2\text{SO}_4$ , filtered and the solvent removed under low pressure. The crude was used in the next step without further purification. The mono-ammino derivative was then dissolved in dry DCM, under nitrogen atmosphere, and EDC (1.3 eq.), DMAP (cat.) and 3-phenylpropionic acid (1.3 eq.) were added at 0 °C. The mixture was let warm up at r.t. and stirred for 4 h. The reaction was monitored by TLC (n-Hex:EtOAc 9:1). Once the reaction was completed, water was added to the mixture. The organic phase was separated and washed with water (2x 30 mL) and brine (30 mL), dehydrated with  $\text{Na}_2\text{SO}_4$  and the solvent removed under low pressure. The crude was purified by column chromatography on silica gel (n-Hex:EtOAc 9:1), obtaining the desired substrate **7b** (170 mg, 76 %) as a colourless oil.  **$^1\text{H NMR}$** : (400 MHz,  $\text{CDCl}_3$ )  $\delta$  = 7.61 – 7.54 (m, 2H), 7.49 – 7.30 (m, 3H), 7.08 (s, 1H), 6.85 – 6.77 (m, 3H), 6.72 (t,  $J$  = 7.4 Hz, 2H), 6.59 (s, 2H), 6.55 – 6.45 (m, 2H), 4.47 (d,  $J$  = 13.3 Hz, 2H), 4.45 (d,  $J$  = 13.3 Hz, 2H), 4.00 – 3.89 (m, 4H), 3.89 – 3.79 (m, 4H), 3.18 (d,  $J$  = 13.4 Hz, 2H), 3.17 (d,  $J$  = 13.4 Hz, 2H), 1.99 – 1.84 (m, 8H), 1.48 – 1.23 (m, 40H), 0.96 – 0.88 (m, 12H).  **$^{13}\text{C NMR}$** : (101 MHz,  $\text{CDCl}_3$ )  $\delta$  = 157.1 ( $\text{C}_q$ ), 156.4 ( $\text{C}_q$ ), 153.8 ( $\text{C}_q$ ), 150.4 ( $\text{C}_q$ ), 135.9 ( $\text{C}_q$ ), 135.5 ( $\text{C}_q$ ), 135.4 ( $\text{C}_q$ ), 134.7 ( $\text{C}_q$ ), 132.6 (CH), 131.0 ( $\text{C}_q$ ), 130.1 (CH), 128.6 (CH), 128.4 (CH), 127.9 (CH), 122.0 (CH), 121.5 (CH), 120.2 ( $\text{C}_q$ ), 120.1 (CH), 85.0 ( $\text{C}_q$ ), 83.7 ( $\text{C}_q$ ), 75.2 ( $\text{CH}_2$ ), 75.1 ( $\text{CH}_2$ ), 32.0 ( $\text{CH}_2$ ), 31.1 ( $\text{CH}_2$ ), 31.0 ( $\text{CH}_2$ ), 30.4 ( $\text{CH}_2$ ), 30.4 ( $\text{CH}_2$ ), 30.3 ( $\text{CH}_2$ ), 30.0 ( $\text{CH}_2$ ), 29.9 ( $\text{CH}_2$ ), 29.8 ( $\text{CH}_2$ ), 29.7 ( $\text{CH}_2$ ), 29.6 ( $\text{CH}_2$ ), 26.5 ( $\text{CH}_2$ ), 26.4 ( $\text{CH}_2$ ), 26.3 ( $\text{CH}_2$ ), 22.7 ( $\text{CH}_2$ ), 14.1 ( $\text{CH}_3$ ). **LC-MS**:  $m/z$   $[\text{M}+\text{NH}_4]^+$  calculated for  $\text{C}_{69}\text{H}_{97}\text{N}_2\text{O}_5$ : 1033.74; found: 1033.46. **HR-MS** (ESI)  $m/z$ :  $[\text{M}+\text{H}]^+$  calcd. for  $\text{C}_{69}\text{H}_{94}\text{NO}_5$  1016.7132; found 1016.7128.

- NMR analysis of **4b'**

**Figure 1.** 2D-ROESY NMR of **4b'** (CDCl<sub>3</sub>, 400 MHz).

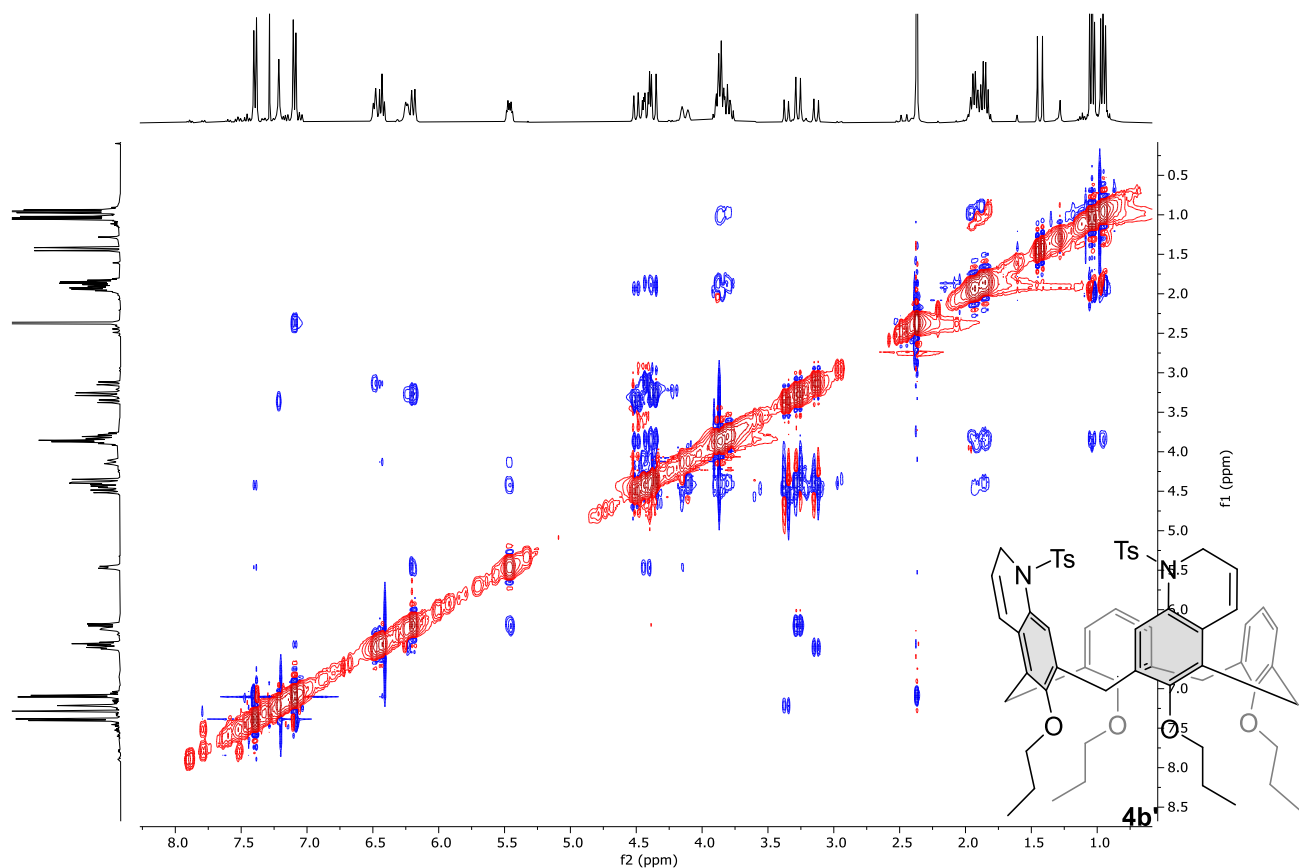

**Figure 2.** Low-field expanded region of the 2D-ROESY NMR of **4b'** (CDCl<sub>3</sub>, 400 MHz, spin-lock = 200 ms) showing the dipolar correlation of:

- Olefinic proton  $\alpha$  with equatorial methylene protons  $\alpha$  (blue)
- Aromatic CH proton with equatorial methylene proton  $\beta$  (red)

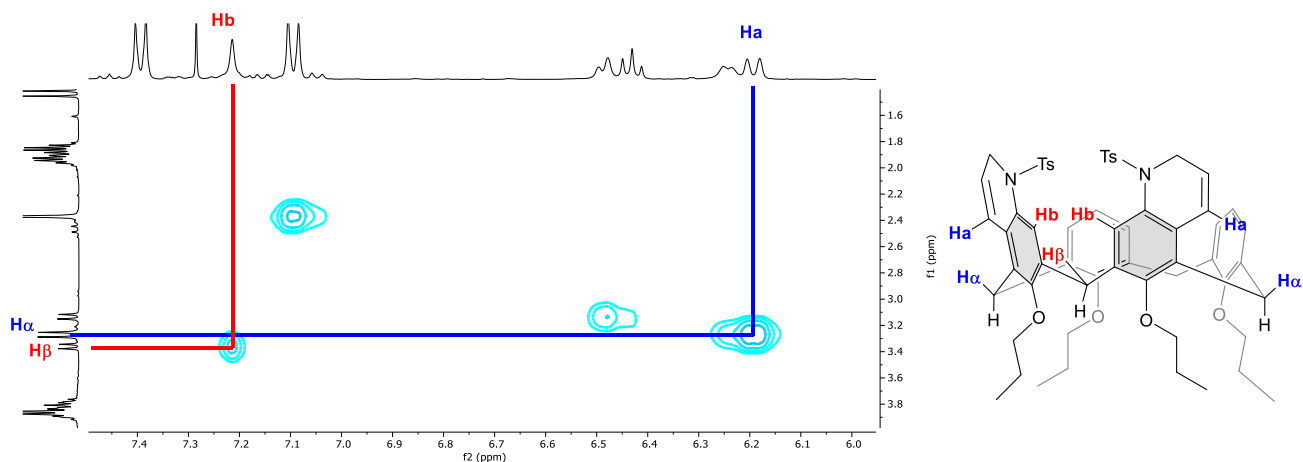

• **Reactivity with substrate 7a**

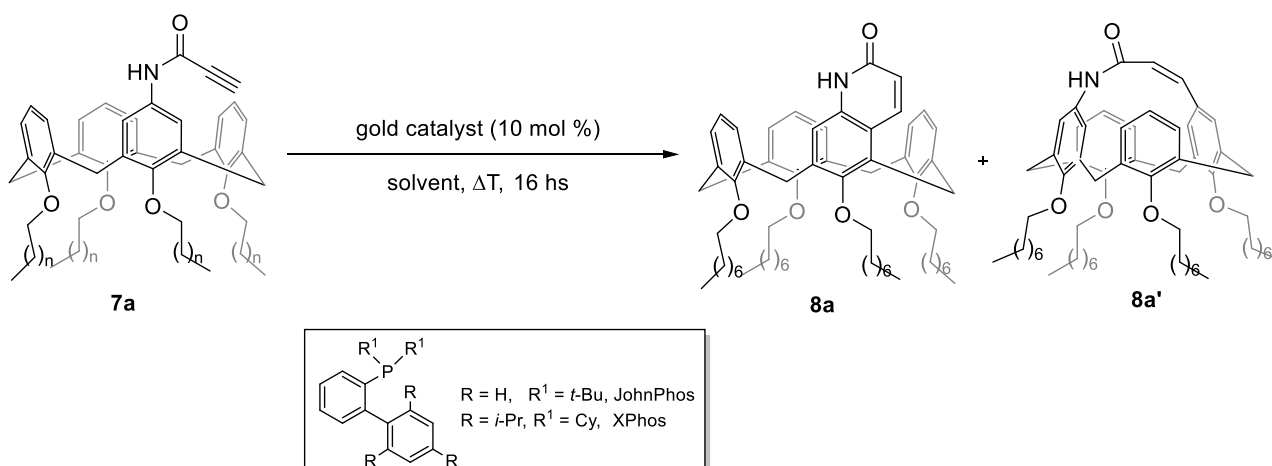

Into a Schlenk flask, under nitrogen atmosphere, **7a** (50.0 mg) and a gold catalyst (10 mol %) were dissolved in a dry solvent (1.0 mL) and the mixture stirred at the desired temperature for 16 hrs. After completion, the mixture was diluted with  $\text{CH}_2\text{Cl}_2$  (10 ml) and filtered through a pad of celite that was washed with additional 20 ml of  $\text{CH}_2\text{Cl}_2$ . The solvent was removed under low pressure and the crude was purified by column chromatography on silica gel (n-Hex: EtOAc 95:5), obtaining the **8a** and **8a'** as an inseparable mixture.\*

| Entry | [Au] (10 mol %)                                               | Solvent                         | T [°C] | Yield [%] | 8a+8a' |
|-------|---------------------------------------------------------------|---------------------------------|--------|-----------|--------|
| 1     | [JohnPhosAu(I)ACN] <sup>+</sup> SbF <sub>6</sub> <sup>-</sup> | CH <sub>2</sub> Cl <sub>2</sub> | 25     | 40        | 1:1.1  |
| 2     | XPhosAuCl/AgSbF <sub>6</sub>                                  | CH <sub>2</sub> Cl <sub>2</sub> | 25     | 25        | 1.1: 1 |
| 3     | [JohnPhosAu(I)ACN] <sup>+</sup> SbF <sub>6</sub> <sup>-</sup> | toluene                         | 50     | 45        | 1:1    |
| 4     | [JohnPhosAu(I)ACN] <sup>+</sup> SbF <sub>6</sub> <sup>-</sup> | DCE                             | 80     | 75        | 1:1.1  |
| 5     | XPhosAuCl/AgSbF <sub>6</sub>                                  | toluene                         | 100    | 67        | 1:1.2  |
| 6     | PPh <sub>3</sub> AuCl/AgSbF <sub>6</sub>                      | toluene                         | 100    | 52        | 1:1.2  |
| 7     | [JohnPhosAu(I)ACN] <sup>+</sup> SbF <sub>6</sub> <sup>-</sup> | toluene                         | 100°C  | 96        | 1:1.2  |

\* Several unsuccessful attempts were made to separate these compounds by preparative TLC. Further, we also attempted chemical modifications by basic hydrolysis (NaOH in EtOH at reflux) or reduction ( $\text{BH}_3 \cdot \text{SMe}_2$ , THF, 80 °C). Unfortunately, low and partial conversions prevented fruitful separations.

**8a + 8a'**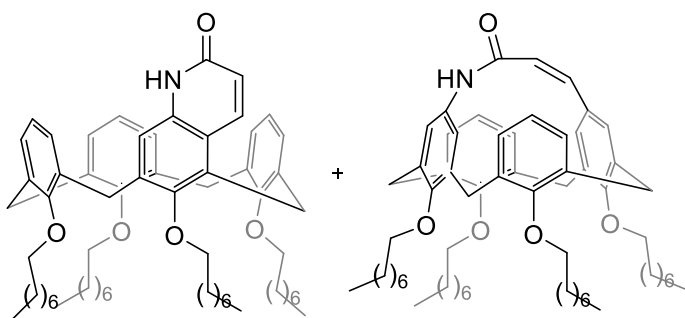

Representative procedure was followed using **7a** (50.0 mg, 0.053 mmol), [JohnPhosAu(I)ACN]<sup>+</sup>SbF<sub>6</sub><sup>-</sup> (10 mol %), toluene (1.0 ml) as the solvent and stirring the reaction at 100 °C. Purification by column chromatography on silica gel (n-Hexane/EtOAc 95:5) yielded **8a + 8a'** (47.8 mg, 96%, **8a/8a'** 1:1.2) as a colourless oil.

**8a:** <sup>1</sup>H NMR (400 MHz, CDCl<sub>3</sub>) δ = 8.52 (d, *J* = 9.1 Hz, 1H), 8.43 (s, 1H), 7.58 (s, 1H), 6.92 (d, *J* = 9.0 Hz, 1H), 6.88 – 6.85 (m, 2H), 6.83 – 6.78 (m, 1H), 6.67 (t, *J* = 7.4 Hz, 1H), 6.43 (s, 2H), 6.34 – 6.27 (m, 2H), 6.13 (d, *J* = 6.7 Hz, 1H), 4.79 – 4.61 (m, 2H), 4.51 – 4.41 (m, 2H), 4.18 (td, *J* = 10.5, 5.7 Hz, 1H), 4.10 – 3.99 (m, 3H), 3.99 – 3.88 (m, 1H), 3.88 – 3.76 (m, 3H), 3.42 (d, *J* = 13.3 Hz, 1H), 3.24 – 3.12 (m, 3H), 2.10 – 1.84 (m, 8H), 1.65 – 1.25 (m, 40H), 0.97 – 0.84 (m, 12H). <sup>13</sup>C NMR (101 MHz, CDCl<sub>3</sub>) δ = 157.5 (C<sub>q</sub>), 157.2 (C<sub>q</sub>), 156.0 (C<sub>q</sub>), 155.7 (C<sub>q</sub>), 153.1 (C<sub>q</sub>), 142.5 (C<sub>q</sub>), 142.1 (C<sub>q</sub>), 136.9 (CH), 136.5 (C<sub>q</sub>), 136.4 (C<sub>q</sub>), 135.7 (C<sub>q</sub>), 134.3 (C<sub>q</sub>), 134.2 (C<sub>q</sub>), 133.2 (C<sub>q</sub>), 131.9 (C<sub>q</sub>), 128.6 (CH), 128.4 (CH), 127.8 (CH), 127.6 (CH), 127.2 (CH), 127.0 (CH), 122.2 (CH), 122.2 (CH), 121.8 (CH), 121.8 (CH), 110.0 (CH), 75.6 (CH<sub>2</sub>), 75.4 (CH<sub>2</sub>), 75.3 (CH<sub>2</sub>), 75.0 (CH<sub>2</sub>), 32.0 (CH<sub>2</sub>), 32.0 (CH<sub>2</sub>), 31.6 (CH<sub>2</sub>), 31.1 (CH<sub>2</sub>), 30.6 (CH<sub>2</sub>), 30.5 (CH<sub>2</sub>), 30.4 (CH<sub>2</sub>), 30.4 (CH<sub>2</sub>), 30.1 (CH<sub>2</sub>), 30.0 (CH<sub>2</sub>), 30.0 (CH<sub>2</sub>), 29.6 (CH<sub>2</sub>), 29.6 (CH<sub>2</sub>), 29.6 (CH<sub>2</sub>), 29.5 (CH<sub>2</sub>), 26.6 (CH<sub>2</sub>), 26.6 (CH<sub>2</sub>), 26.5 (CH<sub>2</sub>), 26.5 (CH<sub>2</sub>), 25.2 (CH<sub>2</sub>), 22.7 (CH<sub>2</sub>), 14.1 (CH<sub>3</sub>).

**8a':** <sup>1</sup>H NMR (400 MHz, CDCl<sub>3</sub>) δ = 8.26 (d, *J* = 7.4 Hz, 1H), 6.92 (s, 1H), 6.83 – 6.78 (m, 2H), 6.76 (t, *J* = 7.3 Hz, 2H), 6.64 – 6.61 (m, 2H), 6.43 (s, 1H), 6.34 – 6.27 (m, 3H), 5.37 (d, *J* = 7.4 Hz, 1H), 4.51 – 4.41 (m, 4H), 3.99 – 3.88 (m, 4H), 3.88 – 3.76 (m, 4H), 3.24 – 3.12 (m, 4H), 2.10 – 1.84 (m, 8H), 1.65 – 1.25 (m, 40H), 0.97 – 0.84 (m, 12H). <sup>13</sup>C NMR (101 MHz, CDCl<sub>3</sub>) δ = 162.3 (C<sub>q</sub>), 156.3 (C<sub>q</sub>), 155.9 (C<sub>q</sub>), 155.4 (C<sub>q</sub>), 142.9 (CH), 142.5 (C<sub>q</sub>), 136.4 (C<sub>q</sub>), 135.9 (C<sub>q</sub>), 135.3 (C<sub>q</sub>), 134.7 (C<sub>q</sub>), 128.7 (CH), 128.4 (CH), 128.0 (CH), 128.0 (CH), 127.8 (CH), 127.6 (CH), 125.6 (C<sub>q</sub>), 121.9 (CH), 121.6 (CH), 120.0 (CH), 113.7 (C<sub>q</sub>), 106.7 (CH), 75.2 (CH<sub>2</sub>), 75.1 (CH<sub>2</sub>), 75.1 (CH<sub>2</sub>), 65.9 (C<sub>q</sub>), 64.9 (C<sub>q</sub>), 32.0 (CH<sub>2</sub>), 31.0 (CH<sub>2</sub>), 30.3 (CH<sub>2</sub>), 30.3 (2CH<sub>2</sub>), 30.2 (CH<sub>2</sub>), 29.9 (CH<sub>2</sub>), 29.9 (CH<sub>2</sub>), 29.8 (CH<sub>2</sub>), 29.8 (CH<sub>2</sub>), 29.7 (CH<sub>2</sub>), 29.7 (CH<sub>2</sub>), 26.3 (CH<sub>2</sub>), 26.2 (CH<sub>2</sub>), 26.2 (CH<sub>2</sub>), 22.7 (CH<sub>2</sub>), 14.1 (CH<sub>3</sub>).

**LC-MS** of the mixture: *m/z* [M+K]<sup>+</sup> calculated for C<sub>63</sub>H<sub>89</sub>KNO<sub>5</sub>: 978.64; found: 978.75.

**Figure 3.** Detailed low-field expanded region of  $^1\text{H-NMR}$  of **8a+8a'** mixture ( $\text{CDCl}_3$ , 400 MHz) showing the  $^1\text{H-NMR}$  resonances of olefinic protons. *Noteworthy, olefinic protons of 8a' are upfield shifted, with respect to their analogues in 8a, because of their proximity to the macrocyclic cavity.*

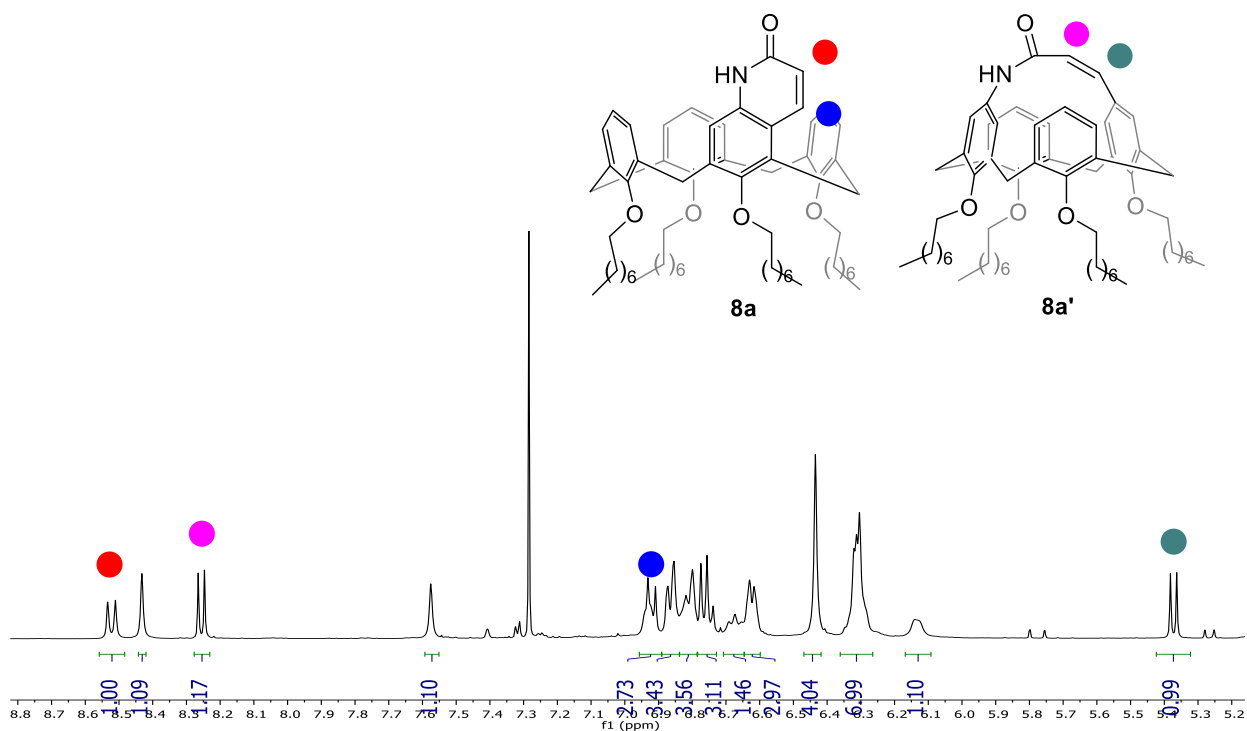

**Figure 4.** Detailed low-field expanded region of 2D  $^1\text{H}^1\text{H}$  COSY NMR ( $\text{CDCl}_3$ , 400 MHz) spectrum of **8a+8a'** mixture showing the  $J$ -coupling correlation of olefinic protons.

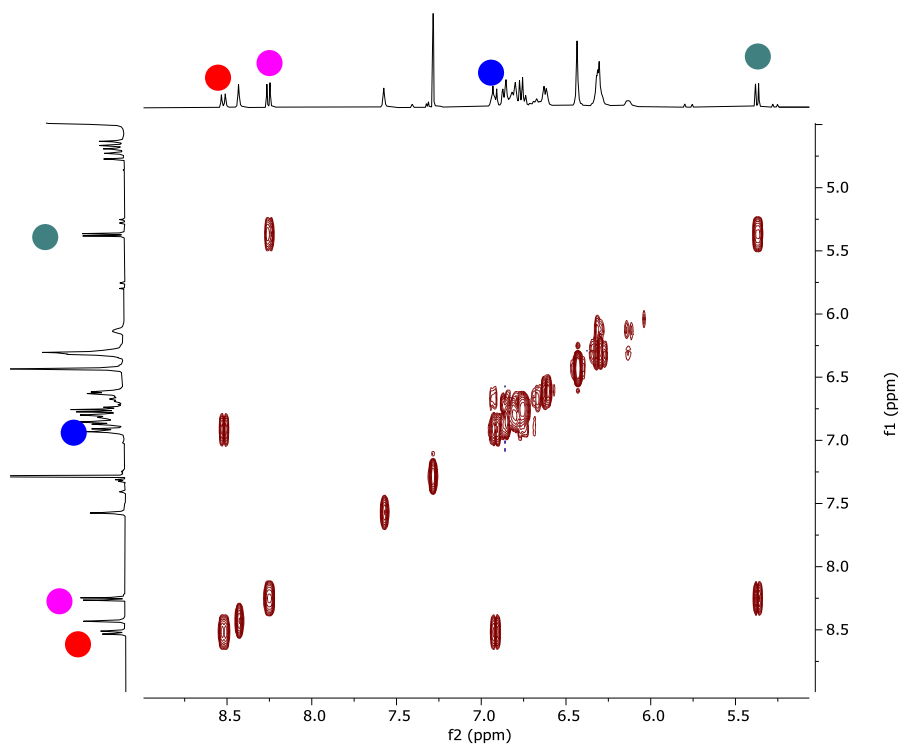

## NMR spectra of 8a+8a':

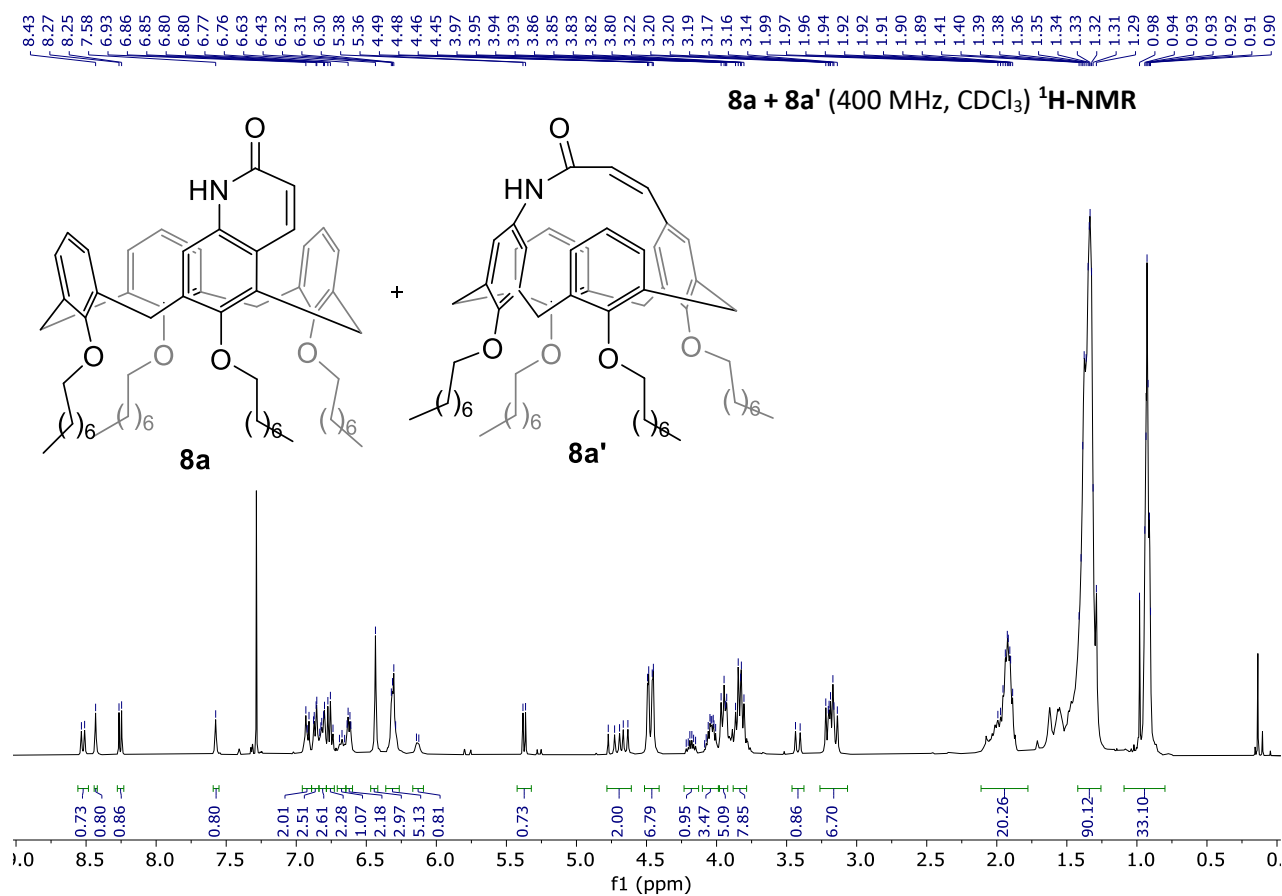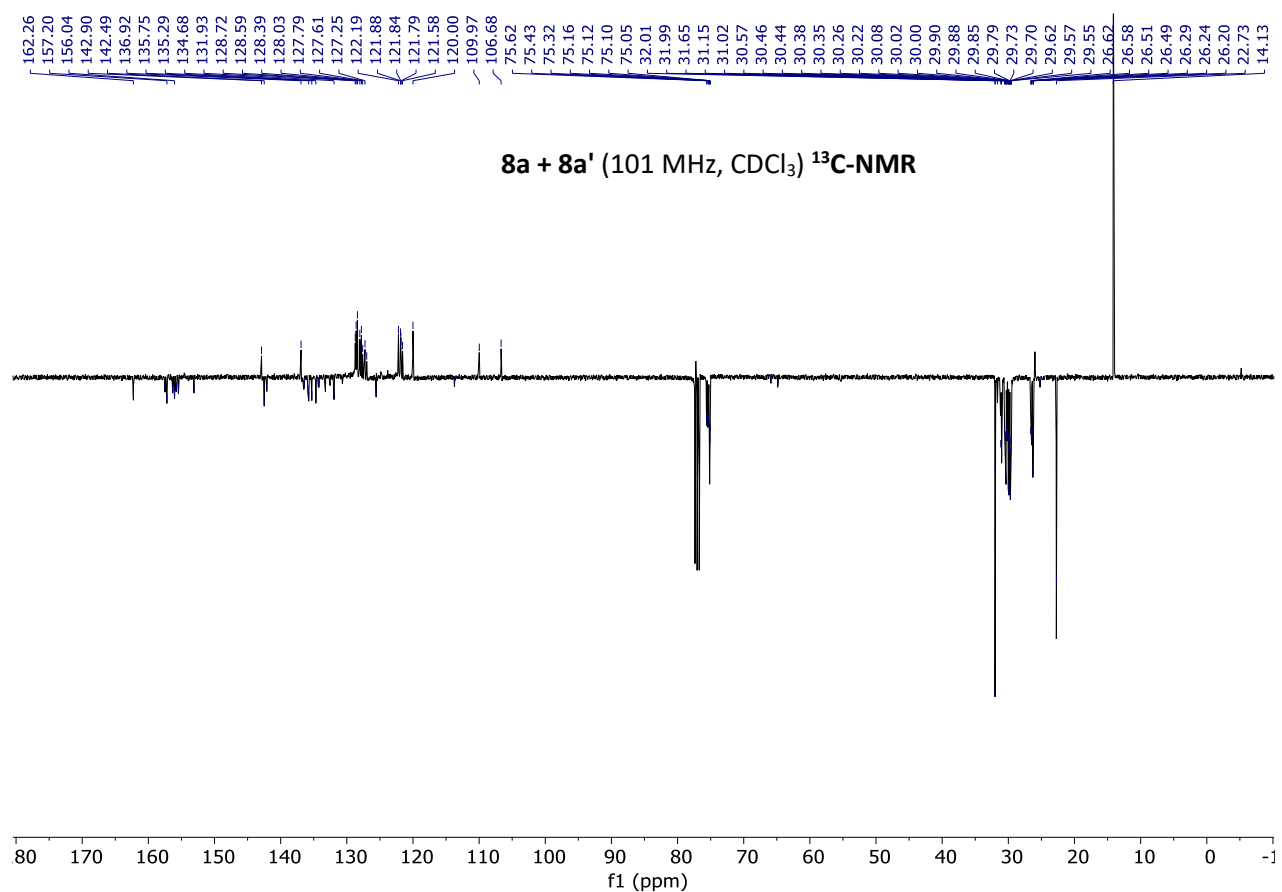

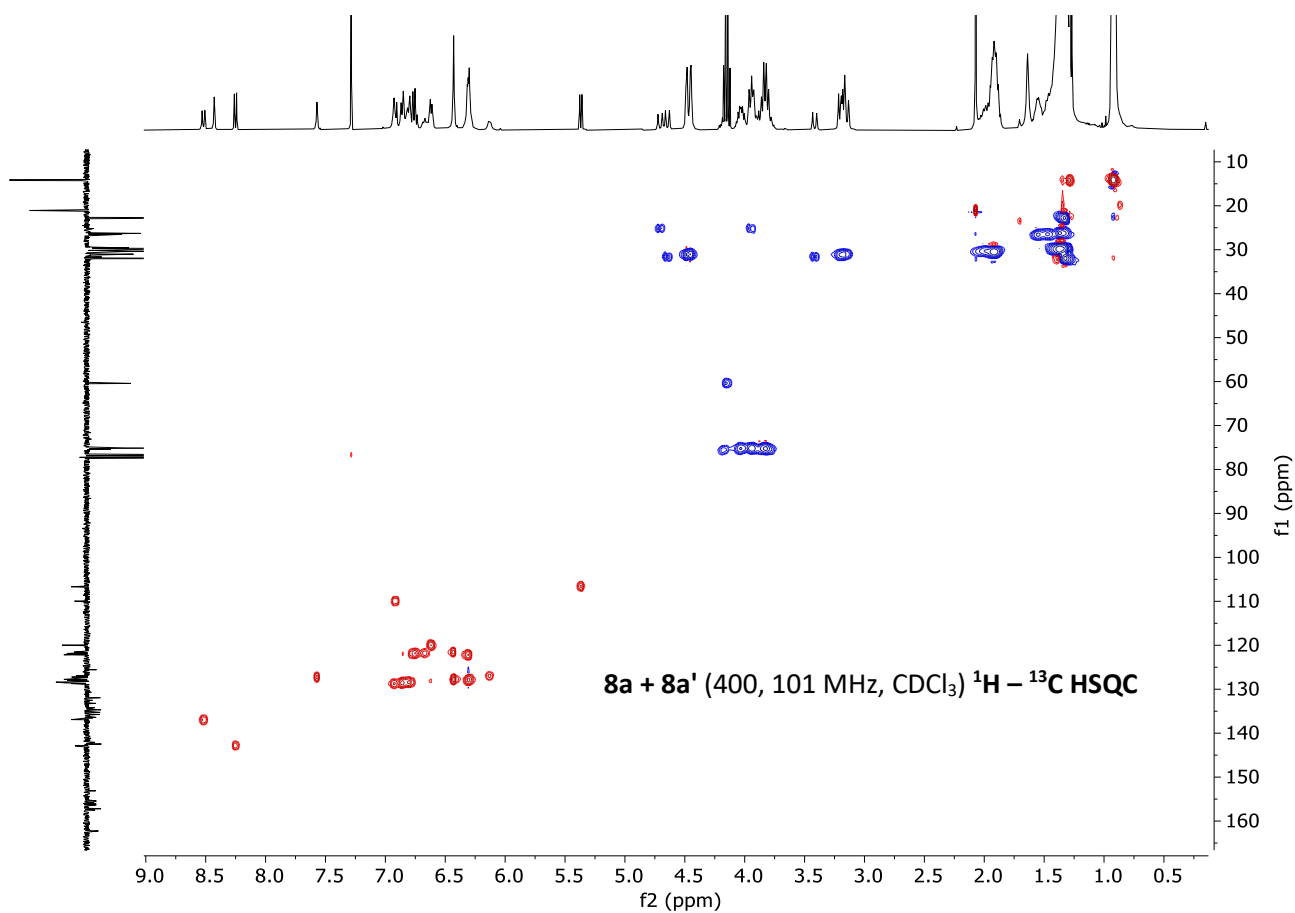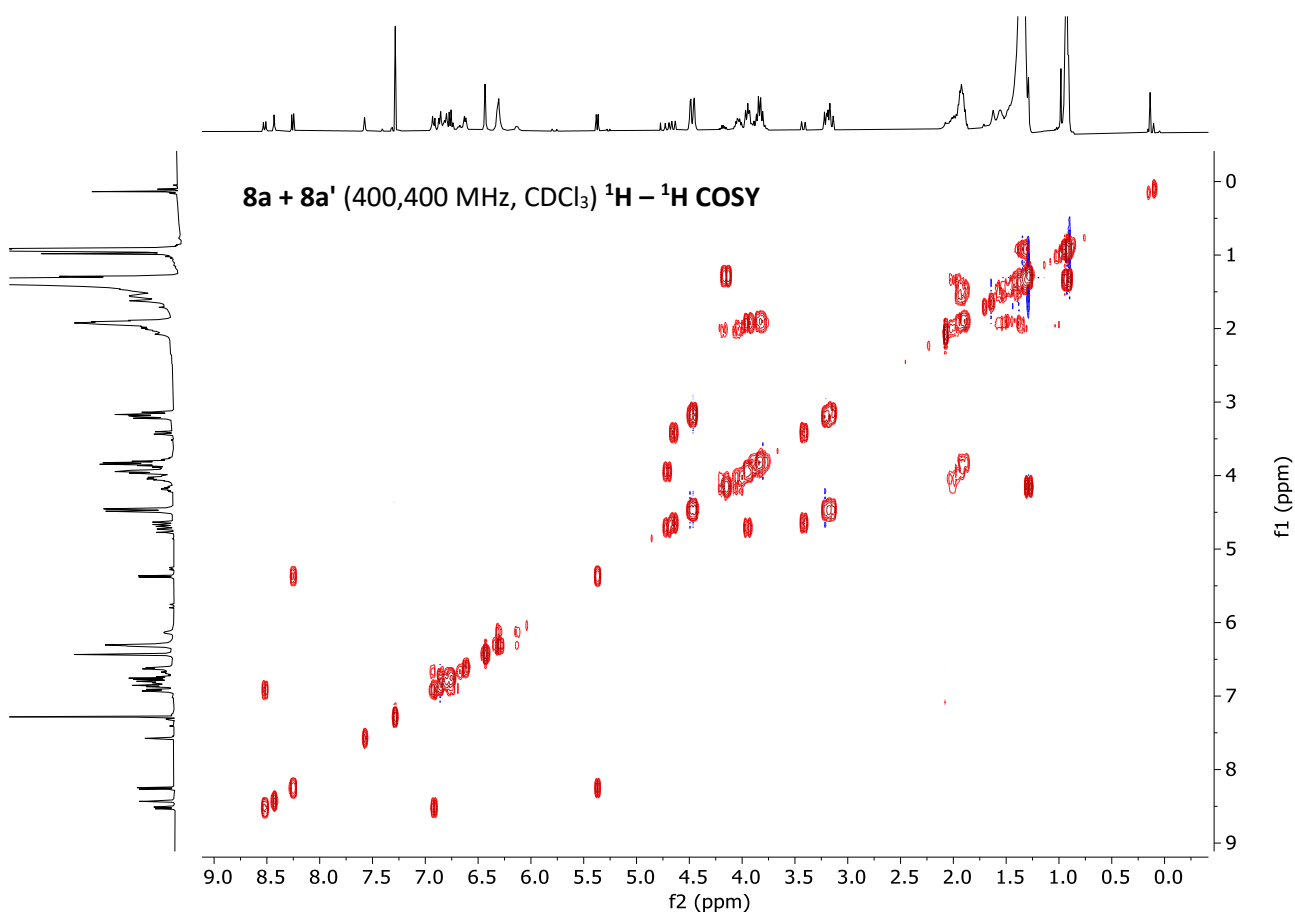



• Preliminary enantioselective studies:

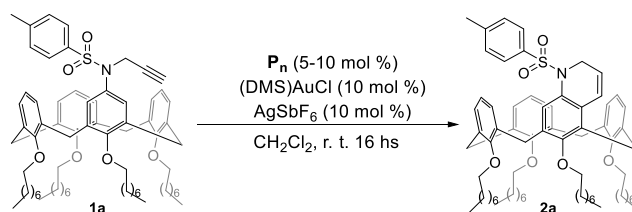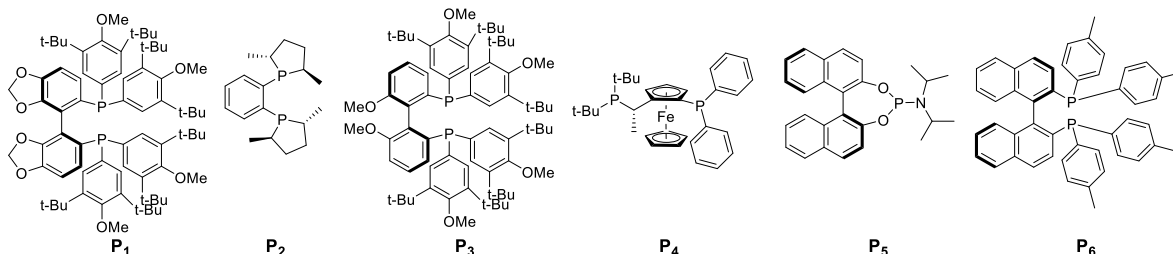

In a two-necked round-bottom flask, under nitrogen atmosphere, (DMS)AuCl (1.6 mg, 0.0056 mmol, 10 mol %) was added to a solution of the appropriate chiral phosphine  $P_n$  (5 or 10 mol % depending on the nature of the phosphine ligand) in dry CH<sub>2</sub>Cl<sub>2</sub>, at 0 °C. The mixture was left stirring for 30 minutes in an iced bath, then allowed to warm up to r.t. and left stirring for an additional 30 minutes. Then, the solvent was removed under reduced pressure and the residue was left under high vacuum for 3 hours. Once the gold complex was formed, dry CH<sub>2</sub>Cl<sub>2</sub> (1 mL) was added along with AgSbF<sub>6</sub> (1.9 mg, 0.0056 mmol, 10 mol %) and the flask was covered with aluminium foil. Finally, the model substrate **1a** (60 mg, 0.056 mmol) was added and the mixture was left stirring at r.t. for 16 h. The reaction was monitored by TLC (n-Hex:EtOAc 98:2). Once the reaction was completed, the mixture was diluted with DCM (10 ml) and filtered through celite. The crude was purified by column chromatography on silica gel (n-Hex: EtOAc 95:5), yielding **2a**.

| Entry | $P_n$                           | Conversion (%) | Yield <b>2a</b> (%) | e.r. <sup>a</sup> |
|-------|---------------------------------|----------------|---------------------|-------------------|
| 1     | <b>P<sub>1</sub></b> (5 mol %)  | 100            | 84                  | 49:51             |
| 2     | <b>P<sub>2</sub></b> (5 mol %)  | 15             | 11                  | 44:56             |
| 3     | <b>P<sub>3</sub></b> (5 mol %)  | 100            | 82                  | 45:55             |
| 4     | <b>P<sub>4</sub></b> (5 mol %)  | 30             | 26                  | 47:53             |
| 5     | <b>P<sub>5</sub></b> (10 mol %) | 100            | 98                  | 36:64             |
| 6     | <b>P<sub>6</sub></b> (5 mol %)  | 59             | 46                  | 45:55             |

a) Enantiomeric excess was determined by HPLC analysis using Lux<sup>®</sup> 5 μm Cellulose 2, eluent: n-Hex:i-PrOH 98:2, flux: 1 ml/min.

Catalysis with [JohnPhosAu(I)ACN]SbF<sub>6</sub>:

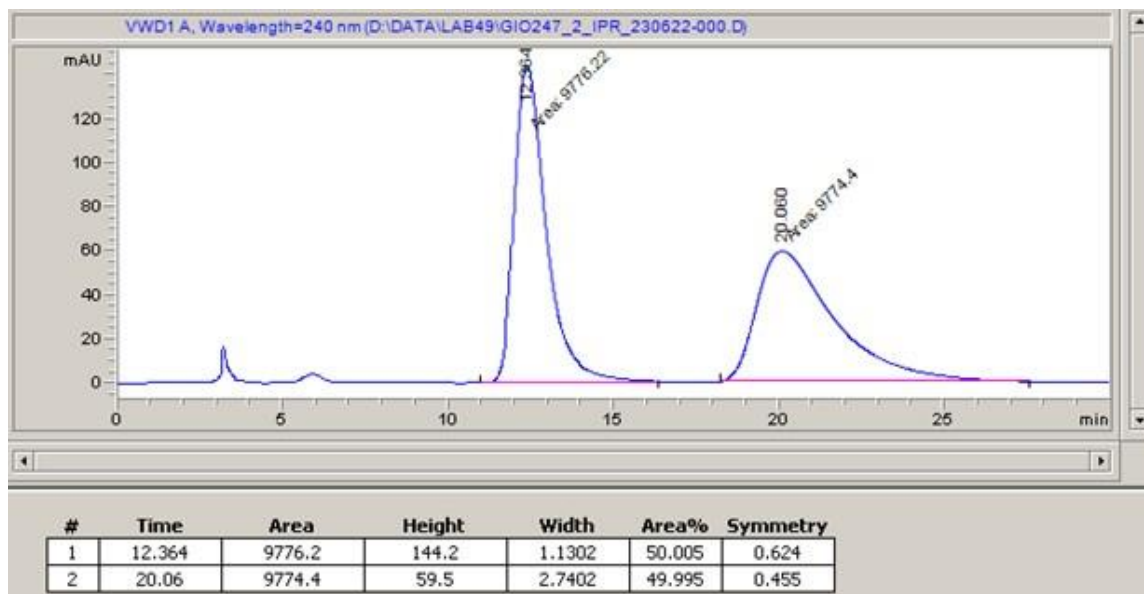

Catalysis with ligand P5:

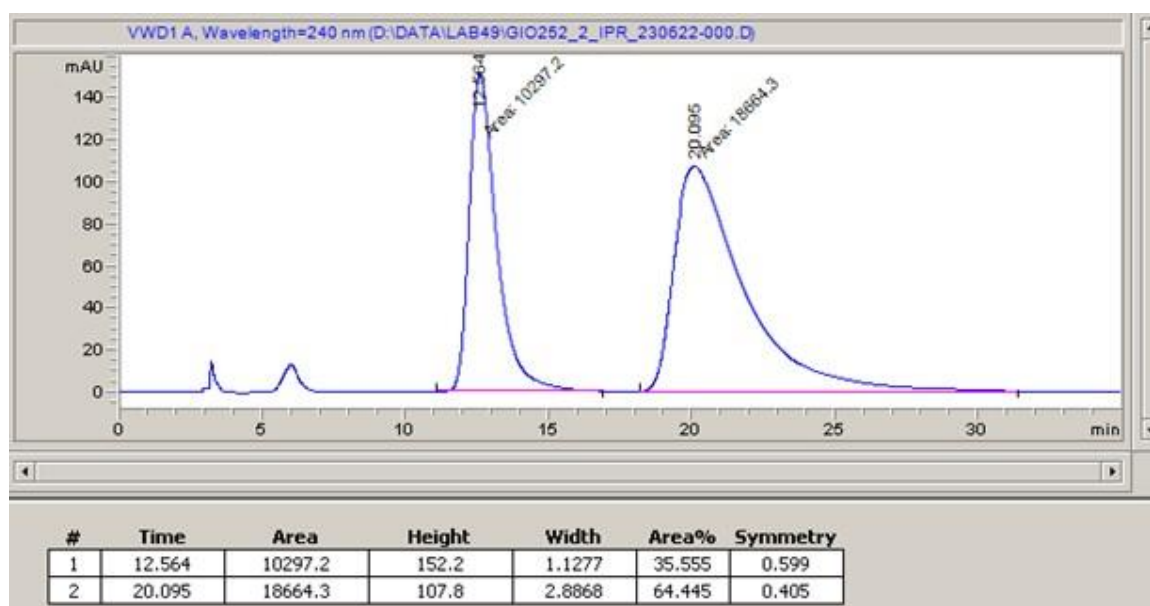

- NMR spectra of reagents:

**Substrate 1a:**

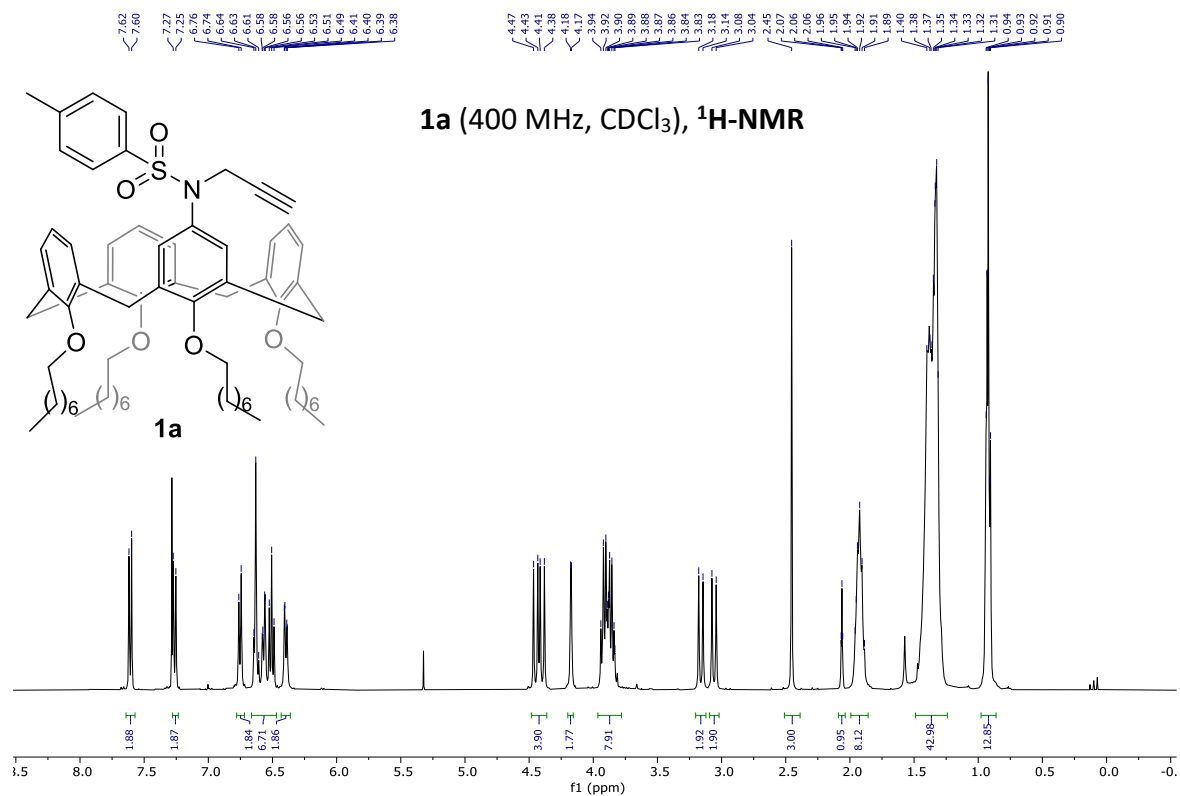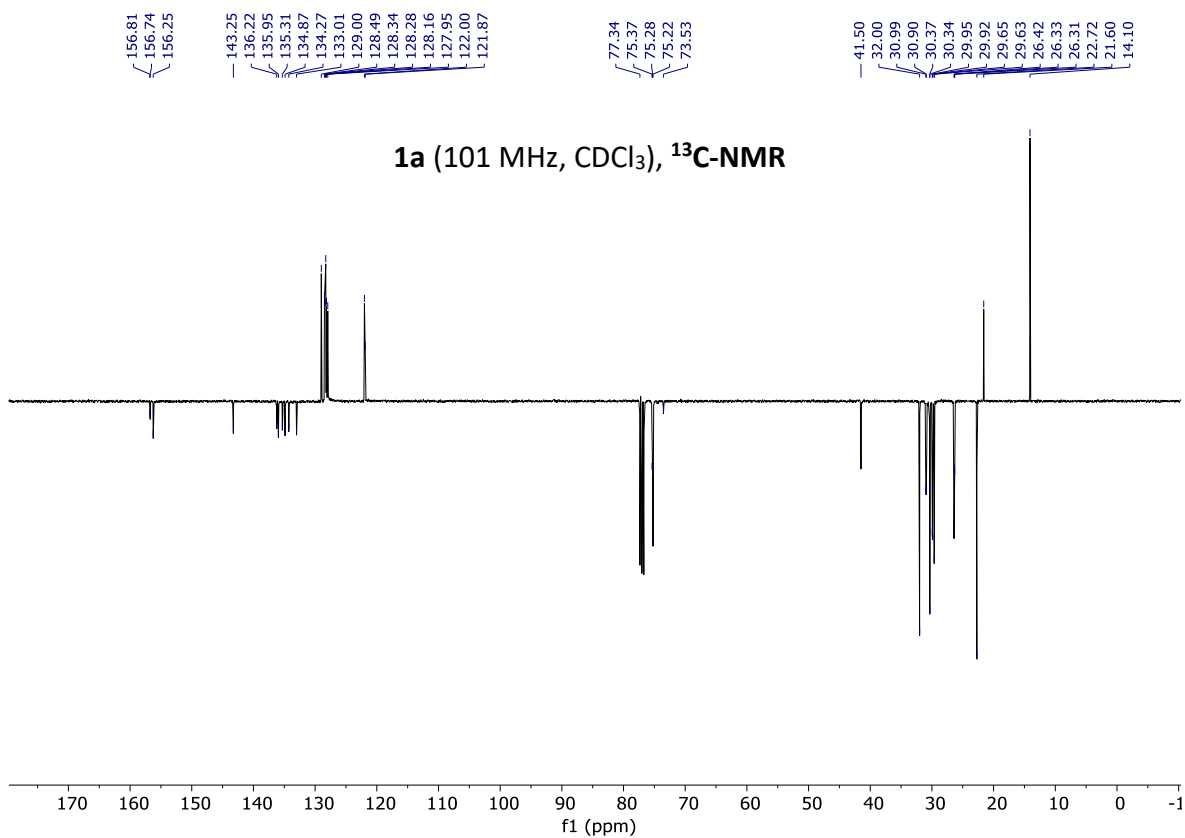



**Substrate 1c:**

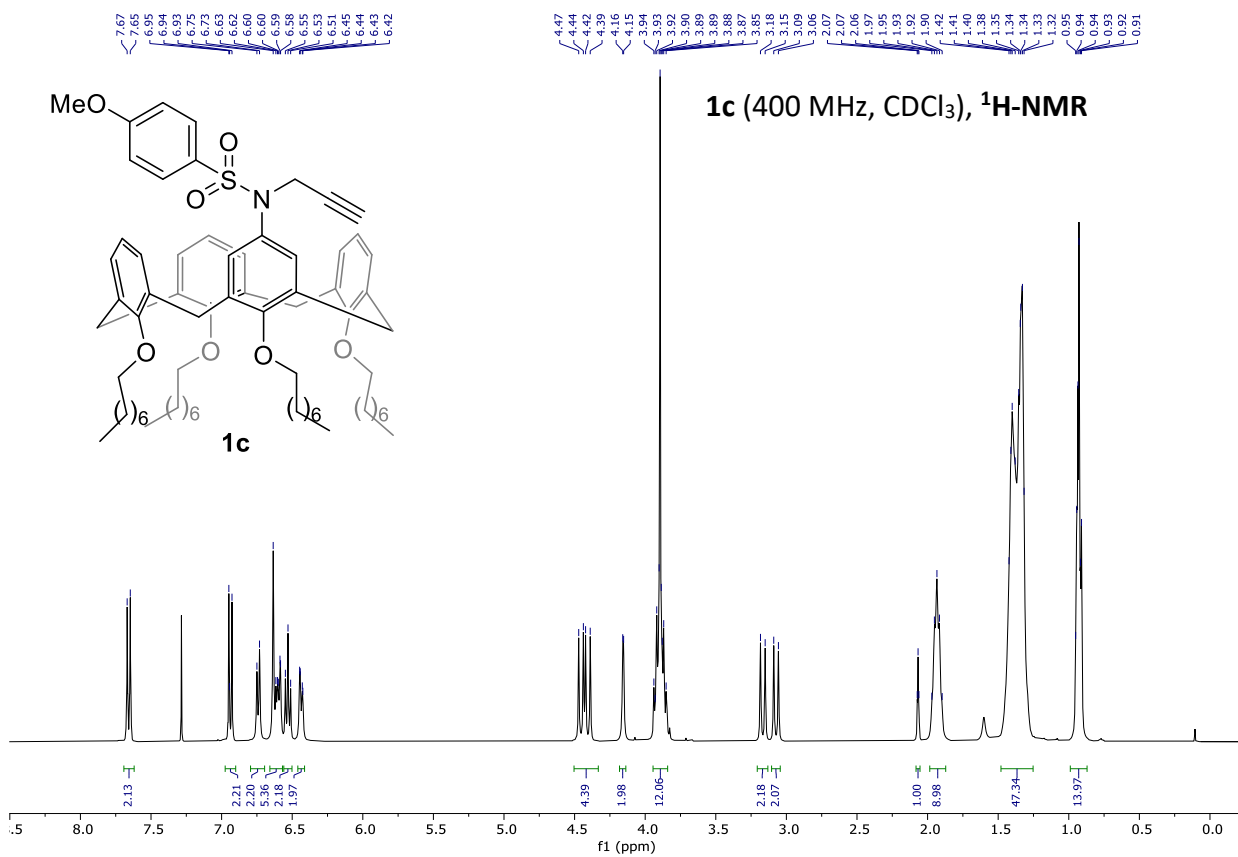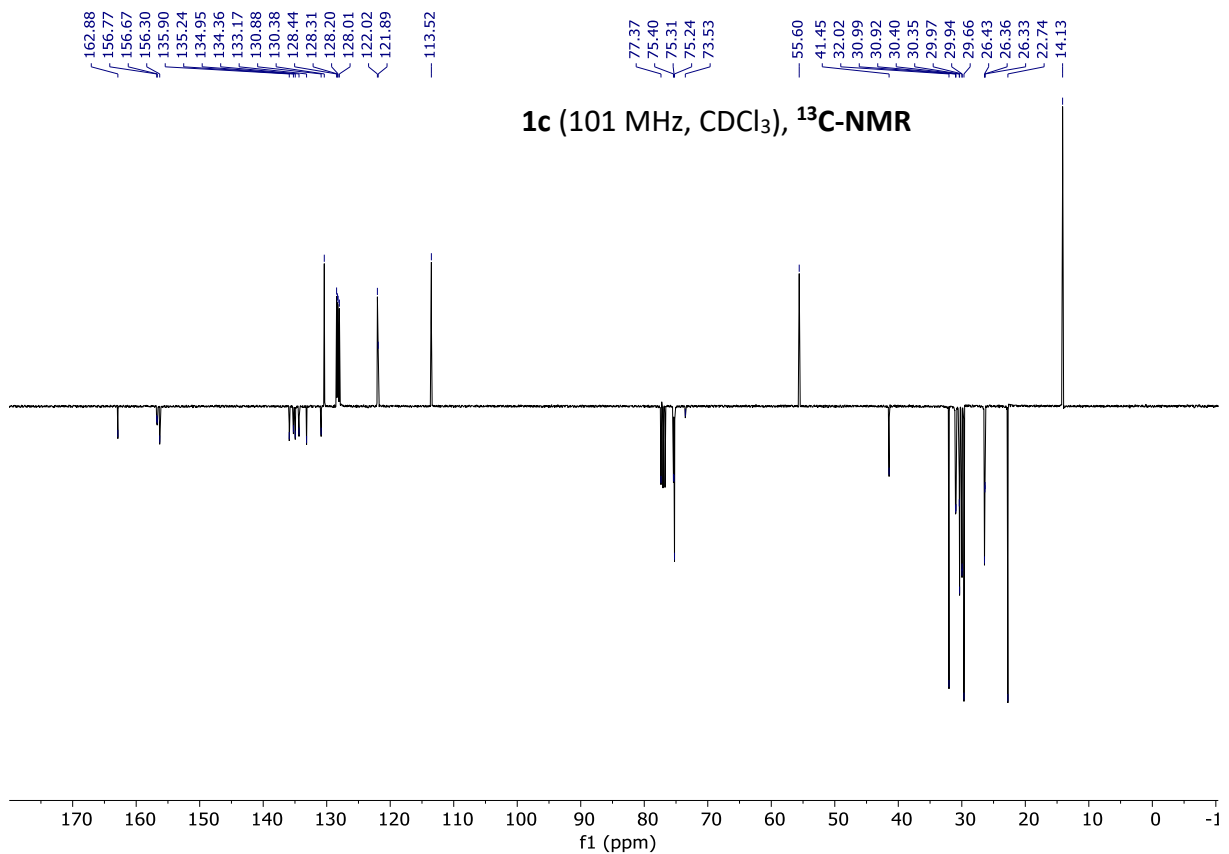

**Substrate 1d:**

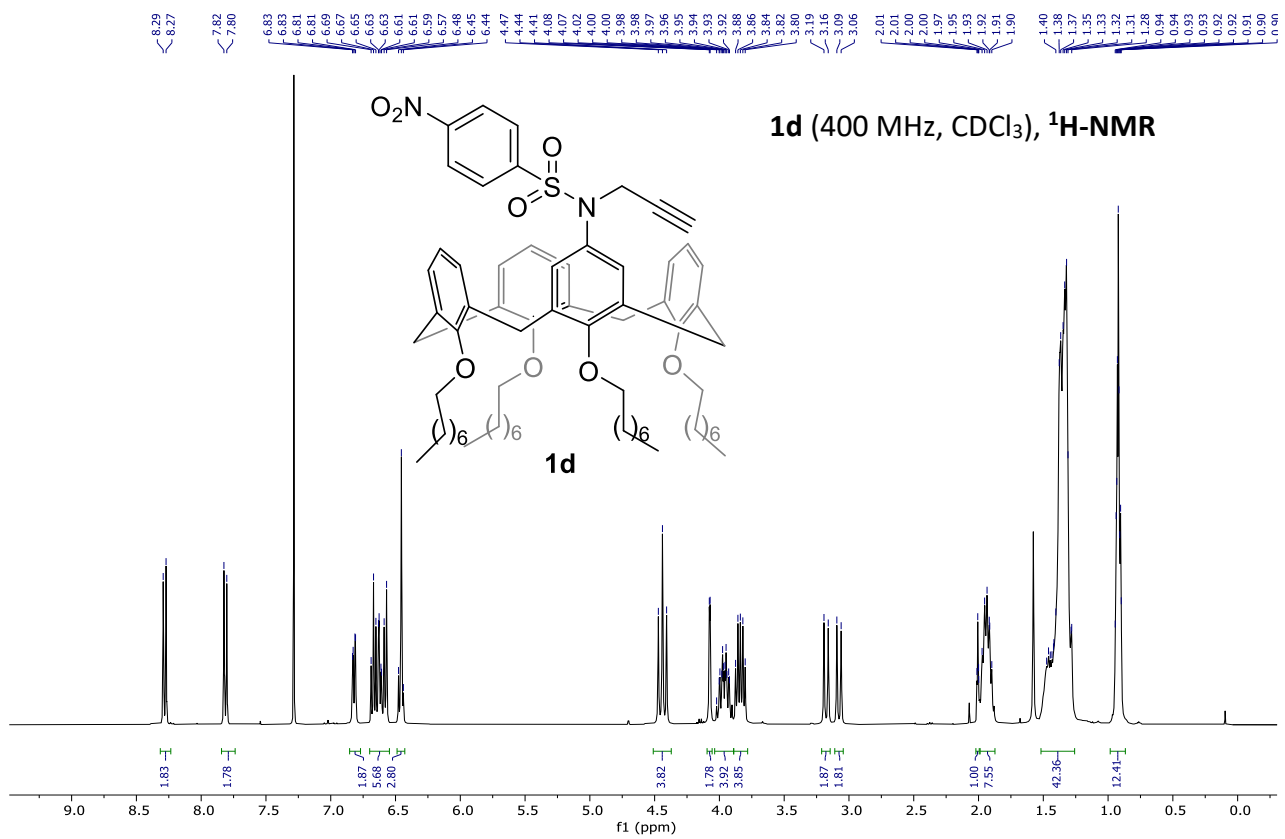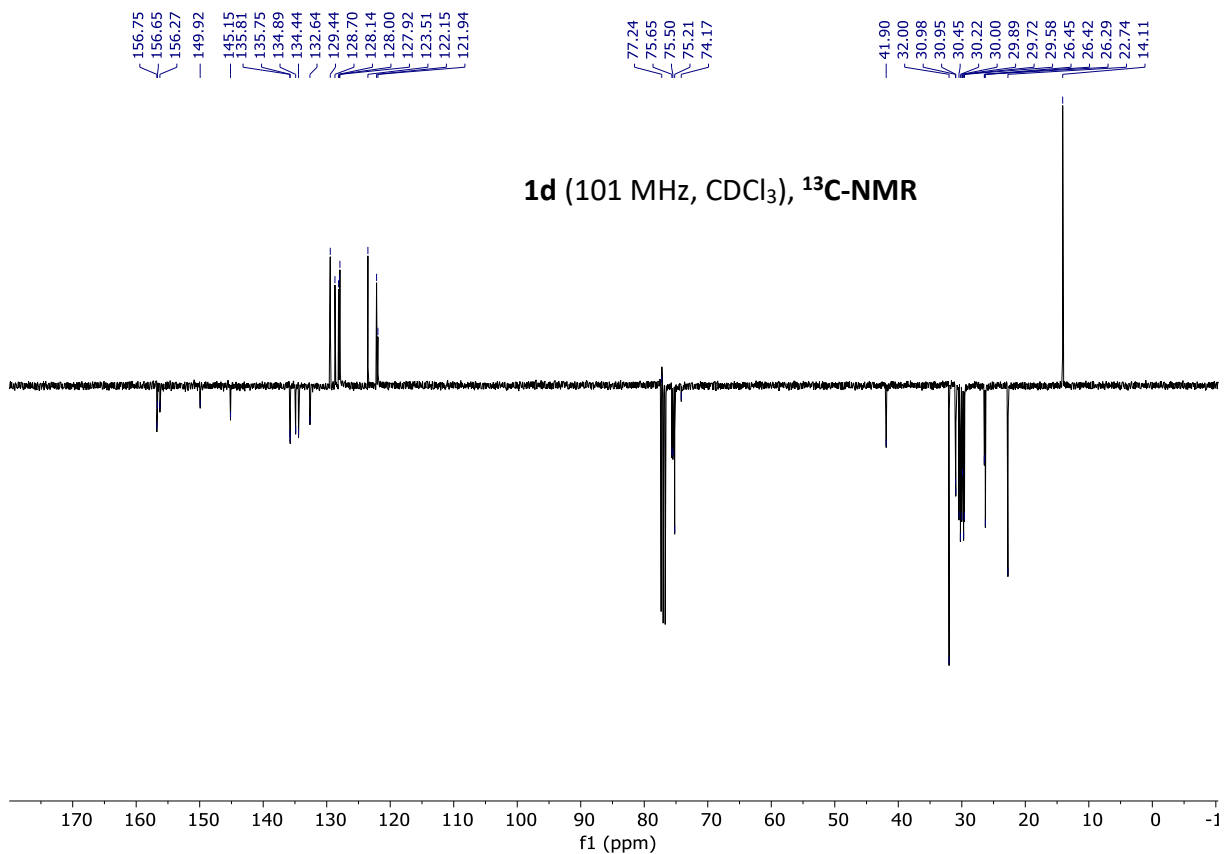

**Substrate 1e:**

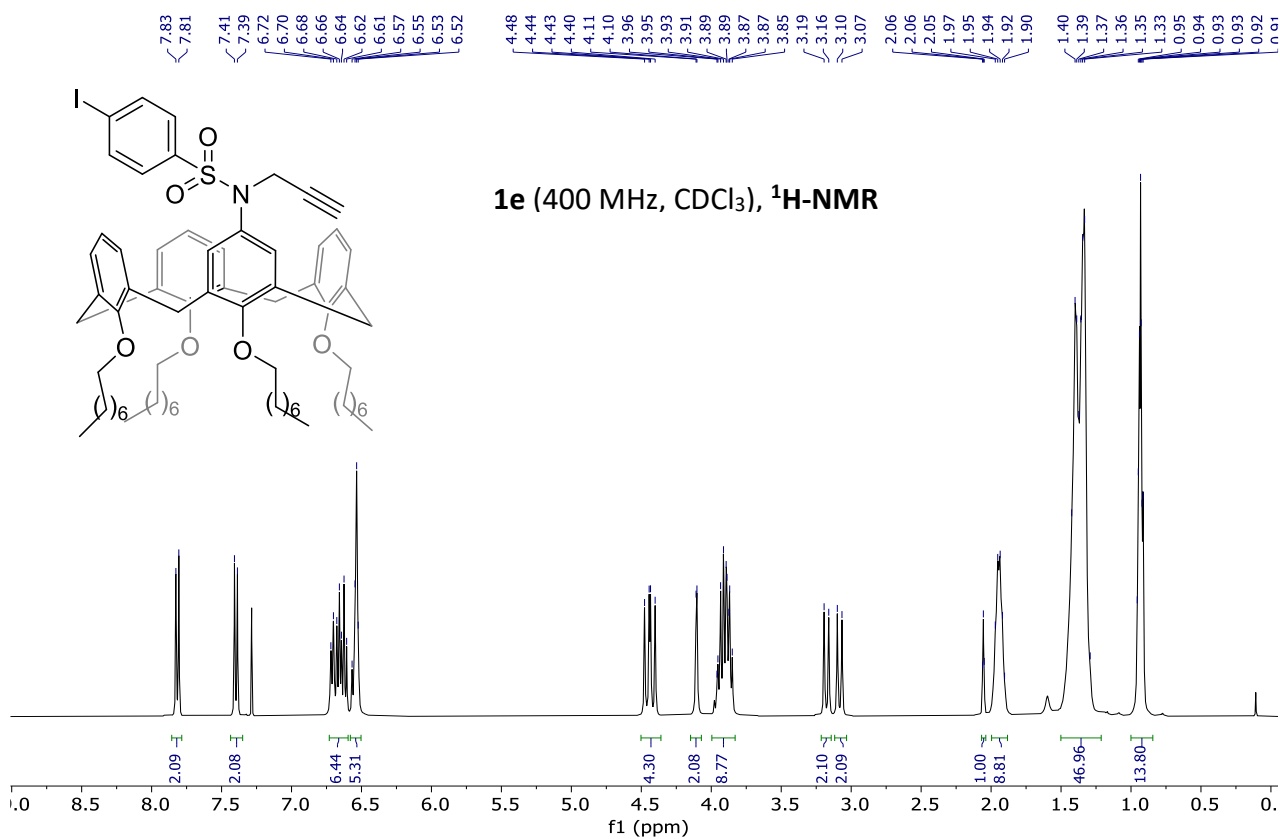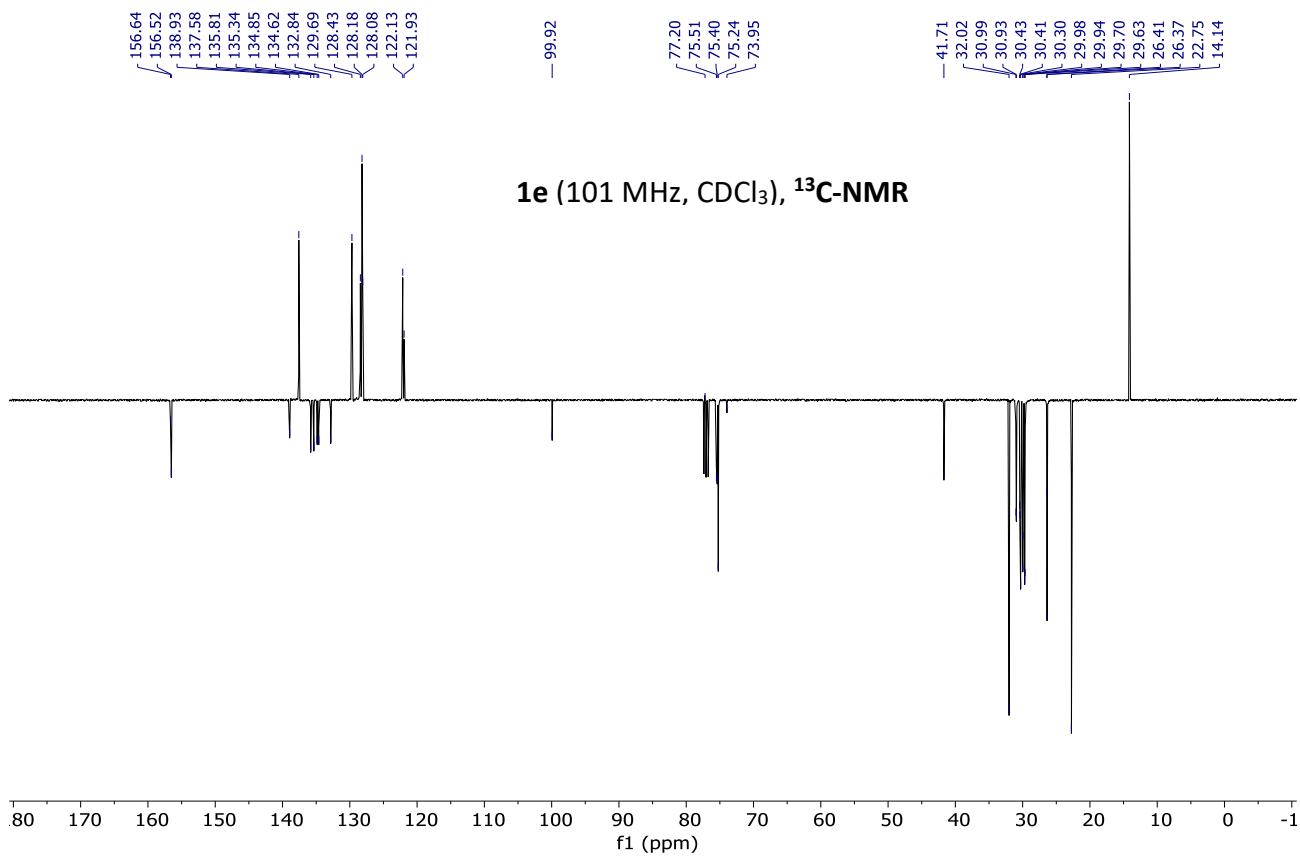

**Substrate 3a:**

7.71 7.69 7.32 7.30 7.04 6.26 6.24 6.22 6.00 5.98 4.53 4.52 4.39 4.35 4.08 4.07 4.06 4.05 4.04 3.66 3.65 3.63 3.06 3.03 2.45 2.27 2.26 2.26 1.96 1.95 1.95 1.94 1.93 1.92 1.86 1.84 1.82 1.82 1.57 1.55 1.55 1.53 1.52 1.50 1.40 1.40 1.37 1.36 1.35 1.35 1.33 1.32 1.32 1.31 1.31 1.29 1.28 1.27 1.25 1.24 1.23 0.94 0.93 0.93 0.92 0.91 0.90

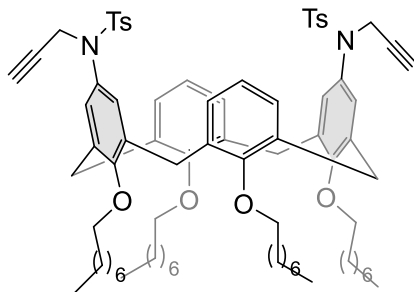

**3a**

**3a (400 MHz, CDCl<sub>3</sub>), <sup>1</sup>H-NMR**

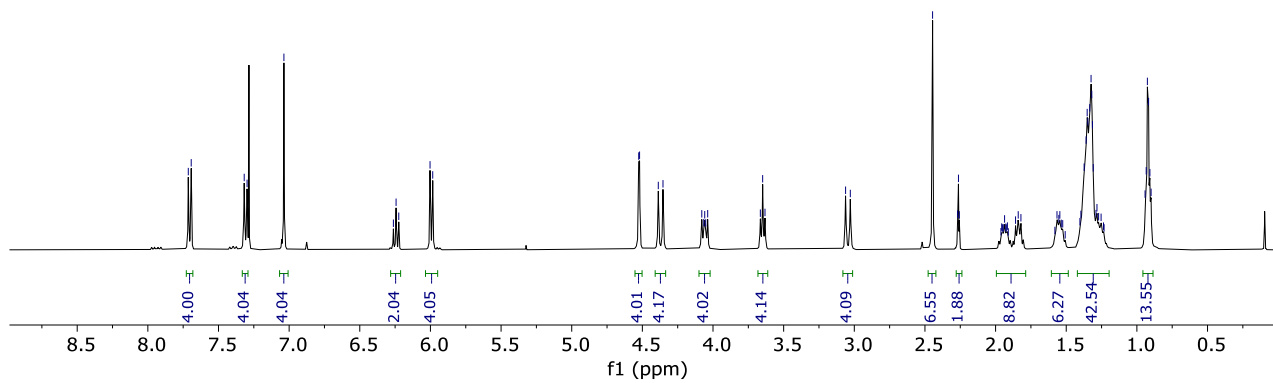

157.82 155.18 143.54 137.48 135.88 132.68 132.56 129.21 128.94 128.25 127.45 121.92 77.20 75.38 75.11 73.58 41.39 31.99 30.85 30.54 30.18 30.07 29.77 29.76 29.46 26.65 26.03 22.74 22.69 21.65 14.10

**3a (101 MHz, CDCl<sub>3</sub>), <sup>13</sup>C-NMR**

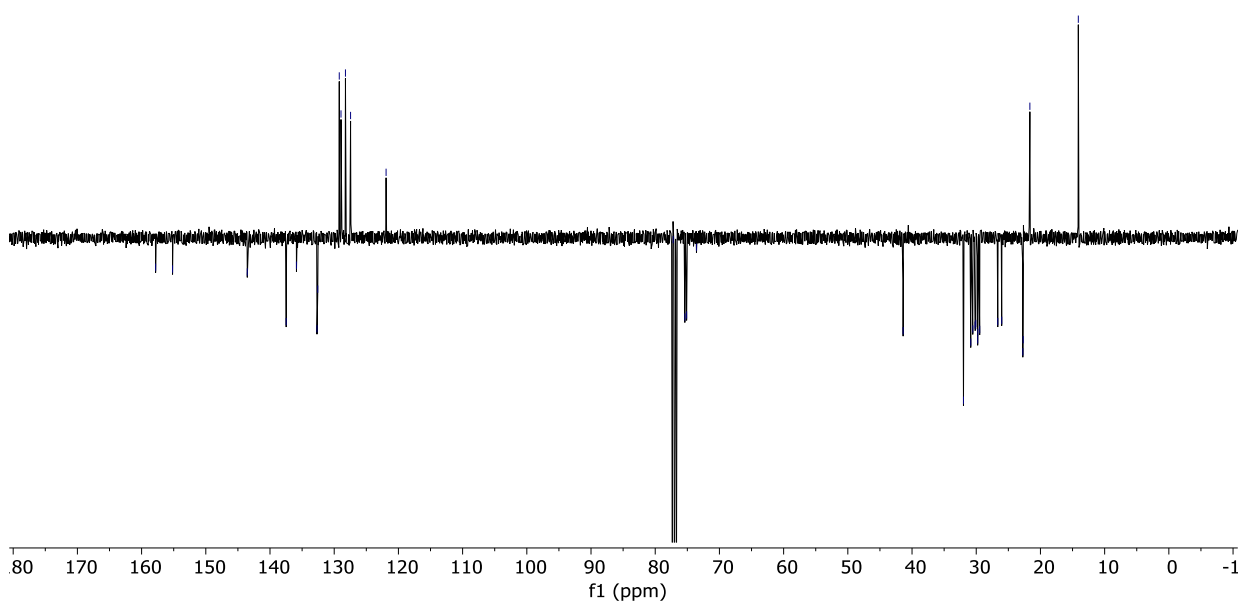



**Substrate 3b:**

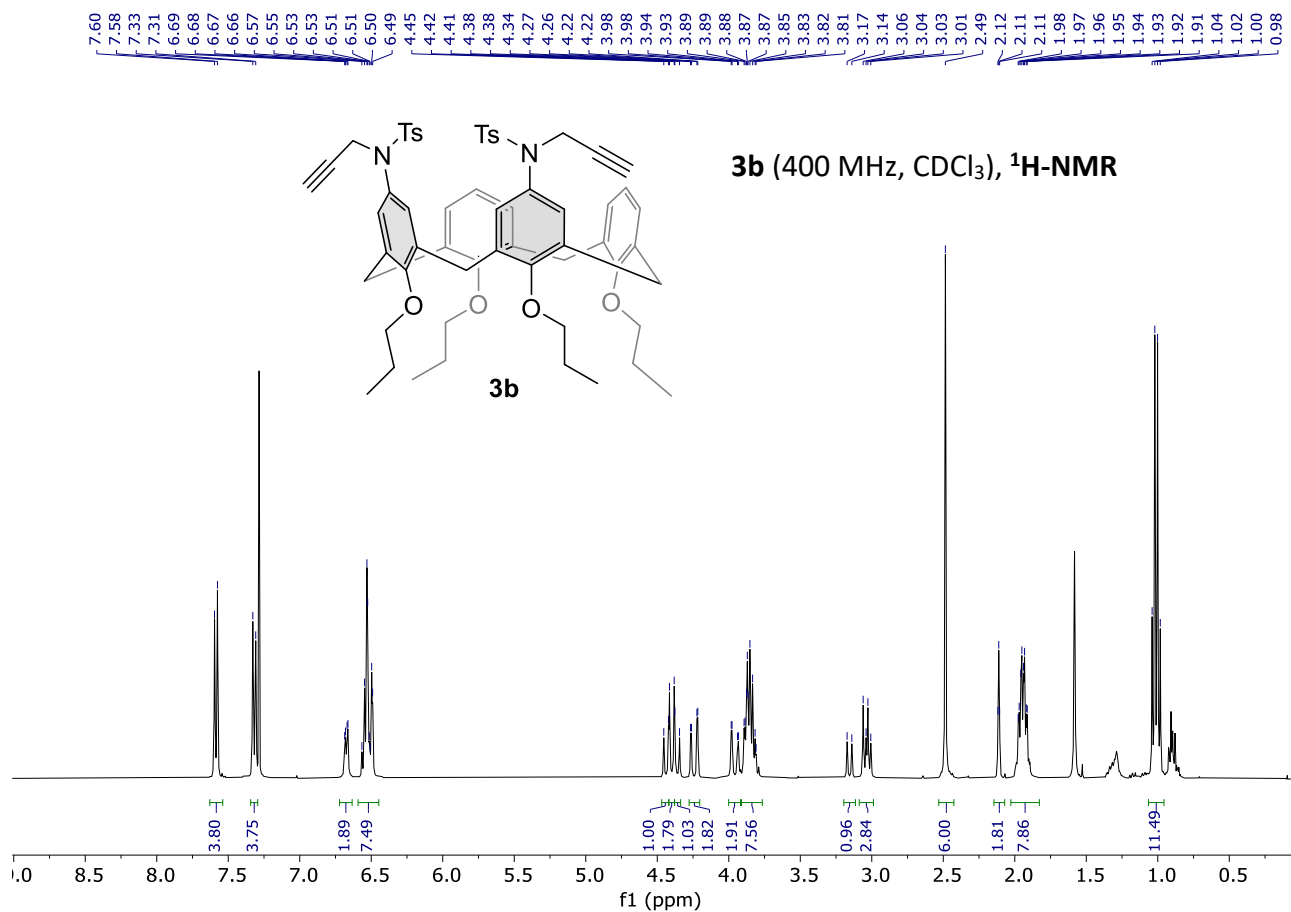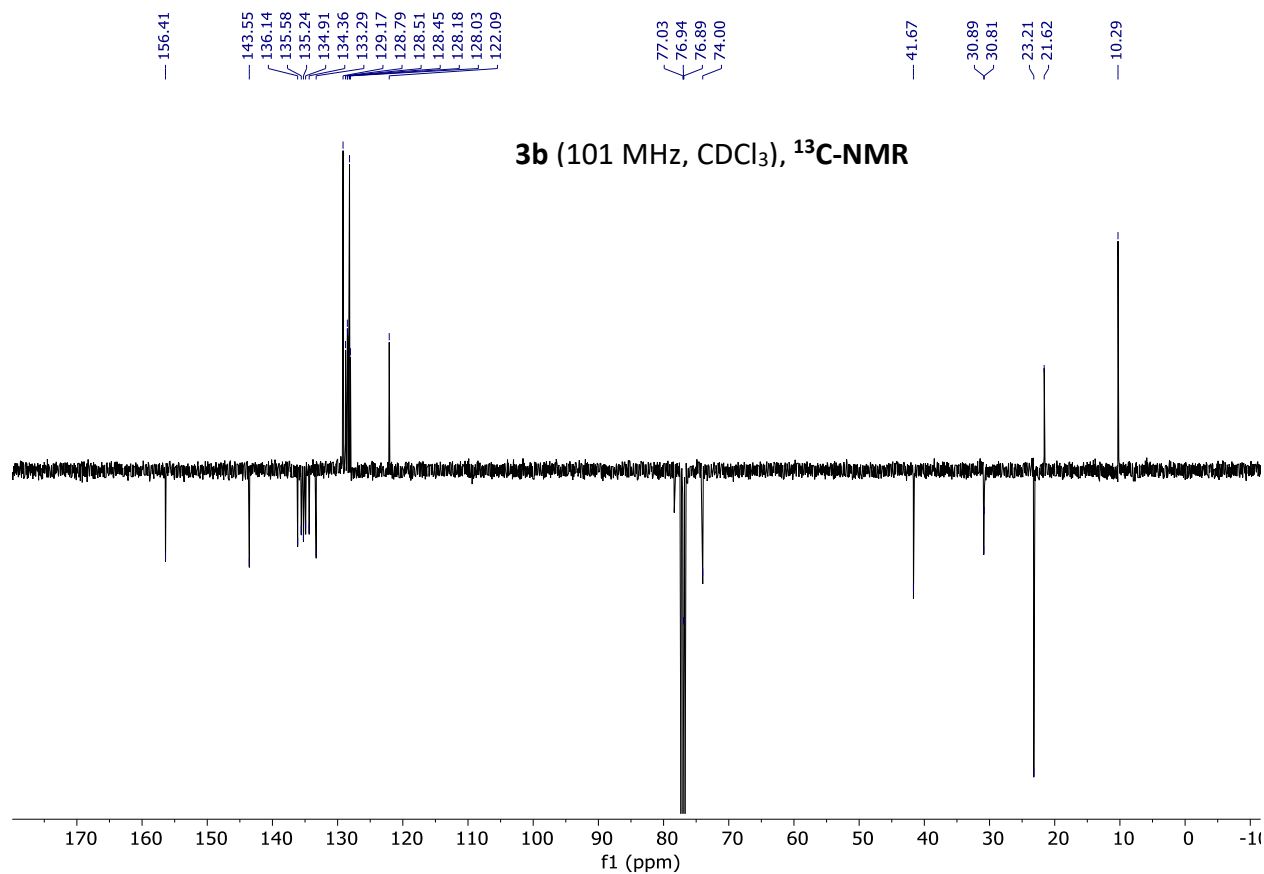

Substrate 5a:

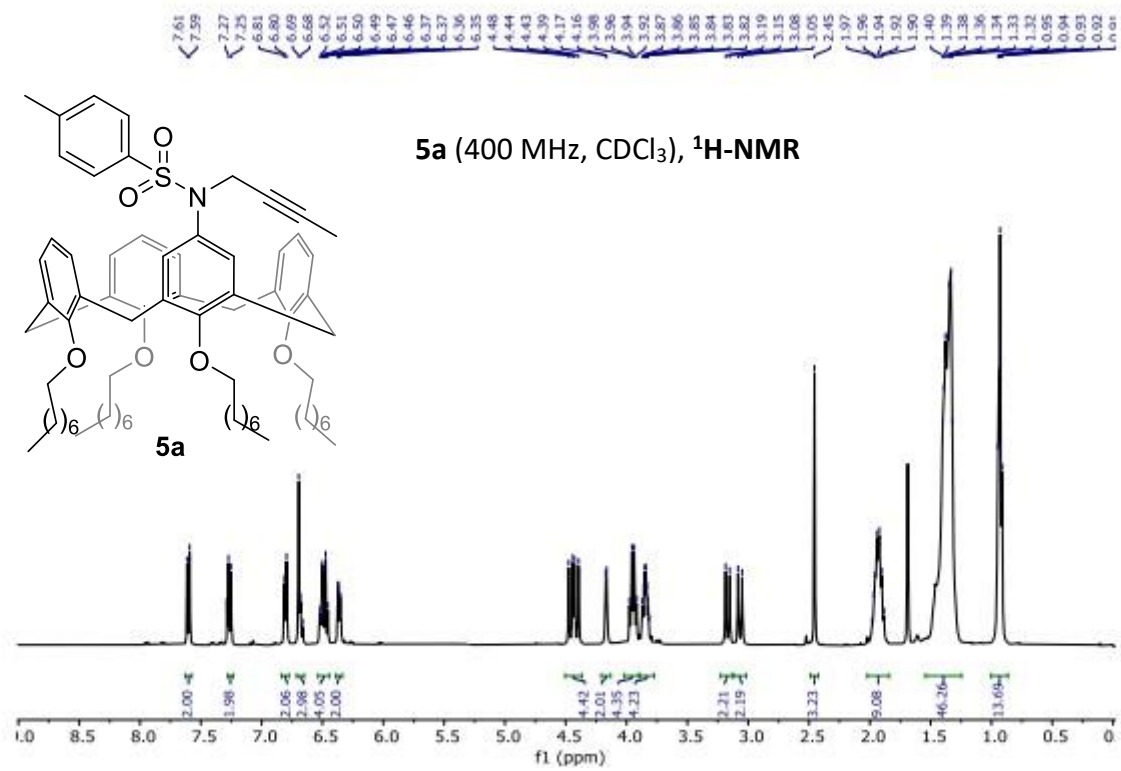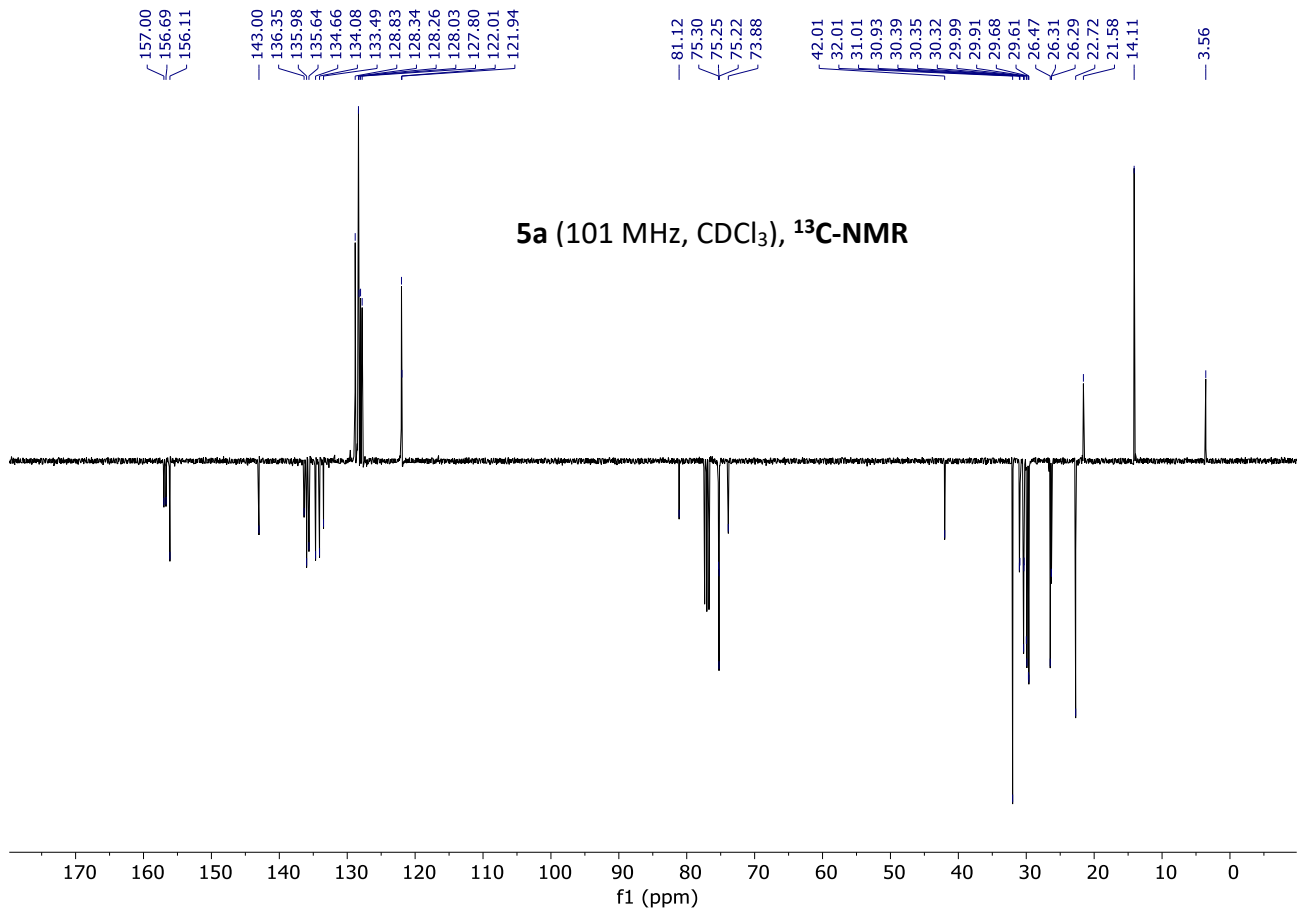

**Substrate 5b:**

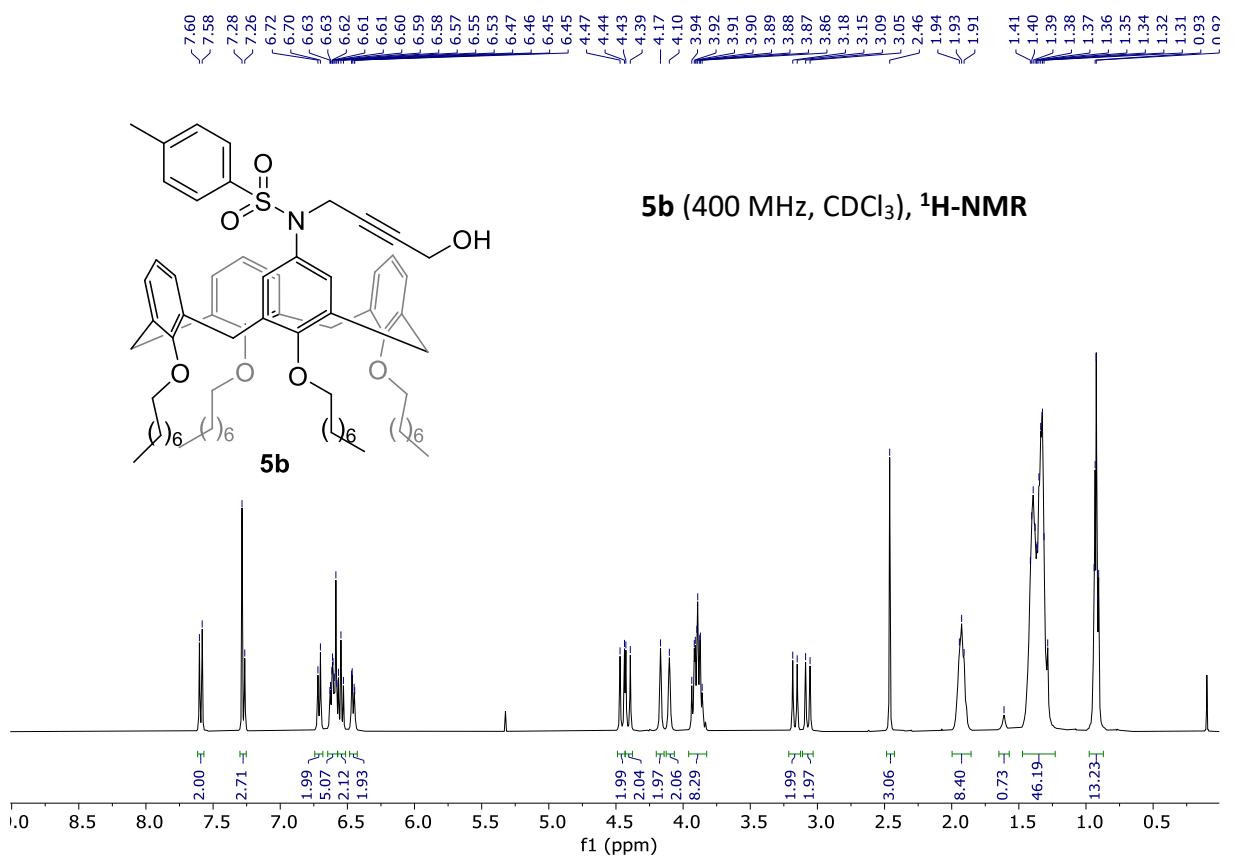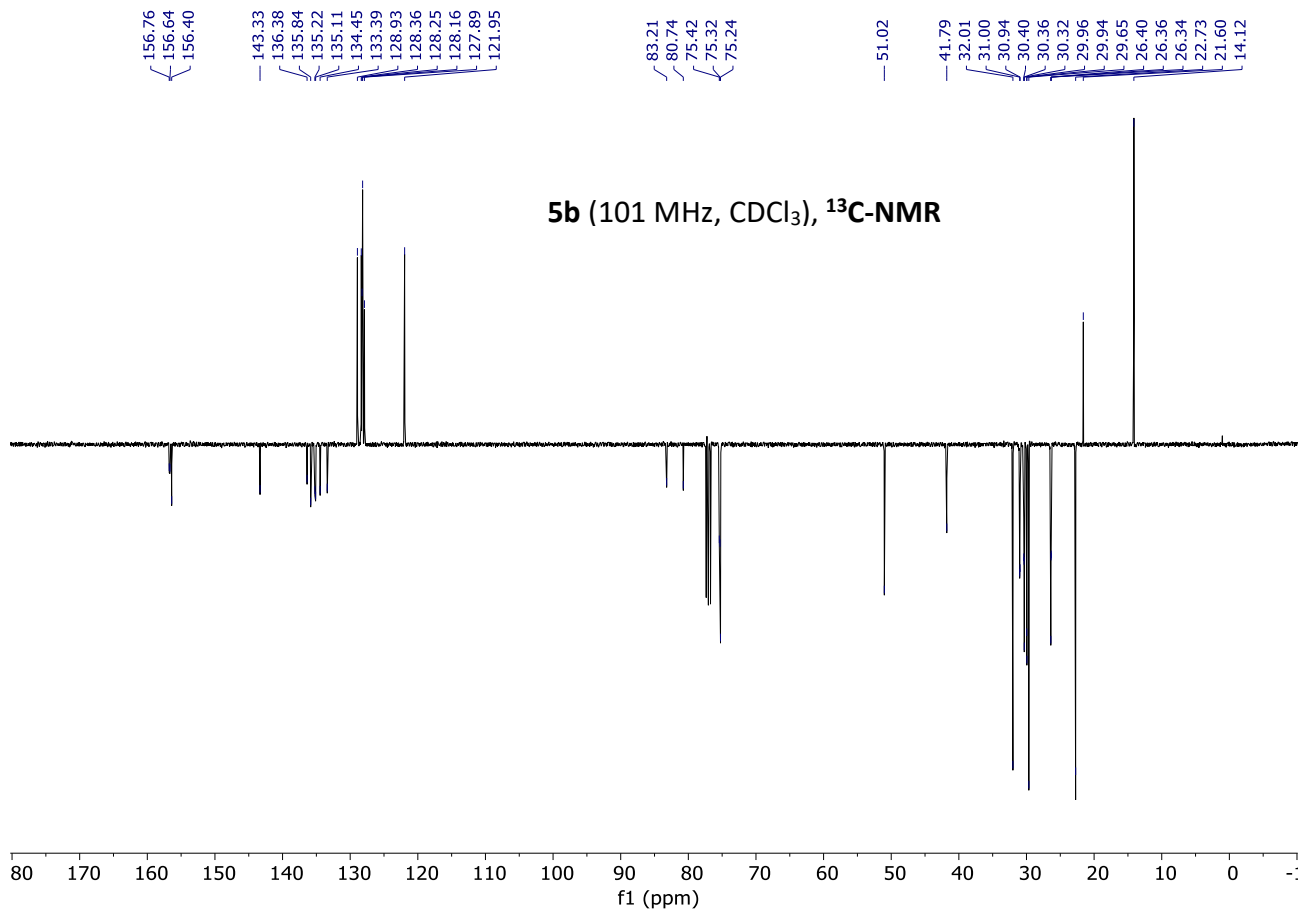

### Substrate 5c:

7.66  
7.63  
7.35  
7.34  
7.34  
7.32  
7.24  
7.23  
7.22  
7.22  
7.21  
7.21  
7.20  
6.84  
6.82  
6.74  
6.50  
6.50  
6.48  
6.48  
6.37  
6.36  
6.36  
6.34  
4.50  
4.47  
4.46  
4.43  
3.97  
3.95  
3.95  
3.93  
3.93  
3.92  
3.91  
3.90  
3.86  
3.85  
3.84  
3.84  
3.83  
3.82  
3.81  
3.20  
3.17  
3.12  
3.09  
2.42  
1.99  
1.98  
1.97  
1.96  
1.95  
1.94  
1.92  
1.07  
1.06  
1.05  
1.04  
1.03  
1.02  
1.01  
1.01  
0.99

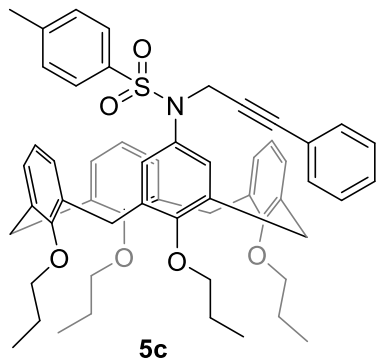

**5c (400 MHz, CDCl<sub>3</sub>), <sup>1</sup>H NMR**

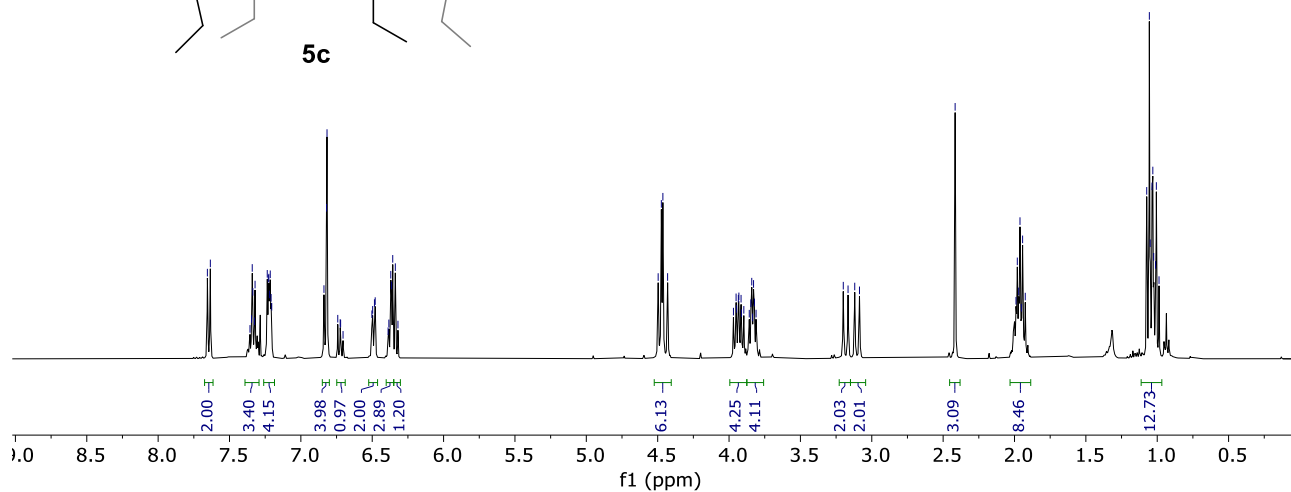

157.00  
156.79  
156.03  
143.17  
136.31  
136.07  
135.63  
134.63  
134.03  
133.52  
131.54  
129.09  
128.36  
128.31  
128.29  
128.19  
128.18  
128.09  
127.86  
122.77  
122.17  
121.94  
85.24  
84.17  
76.84  
76.81  
76.75  
42.23  
30.99  
23.31  
23.26  
23.21  
21.57  
10.47  
10.27  
10.24

**5c (101 MHz, CDCl<sub>3</sub>), <sup>13</sup>C NMR**

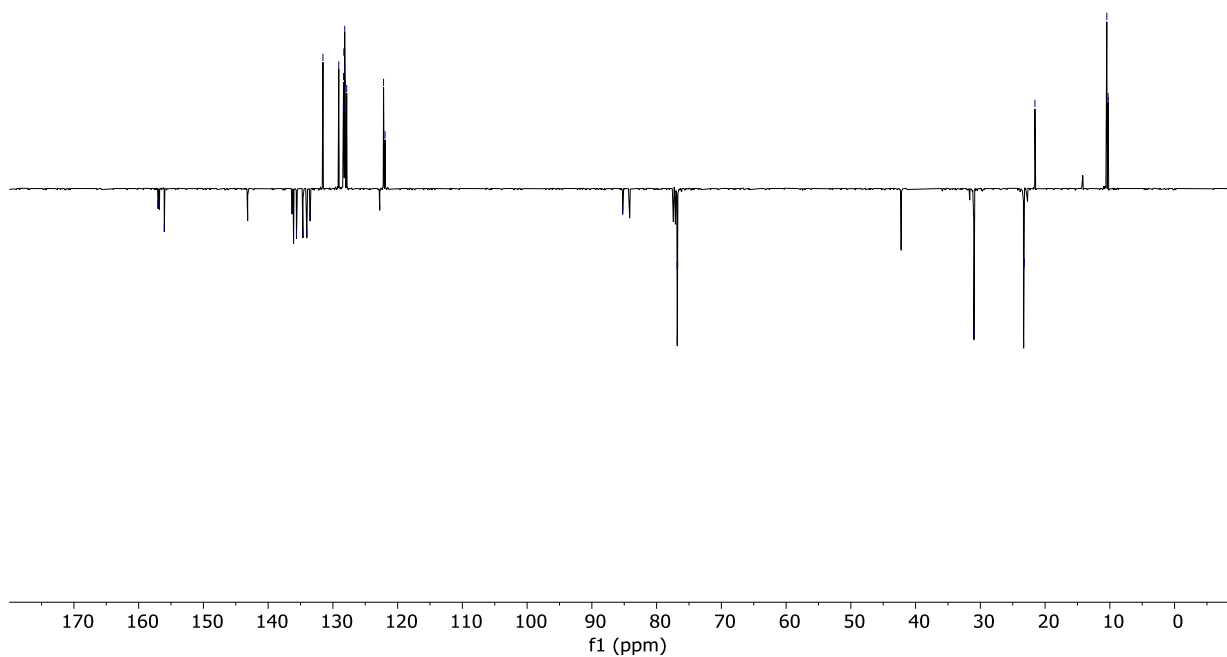

**Substrate 5d:**

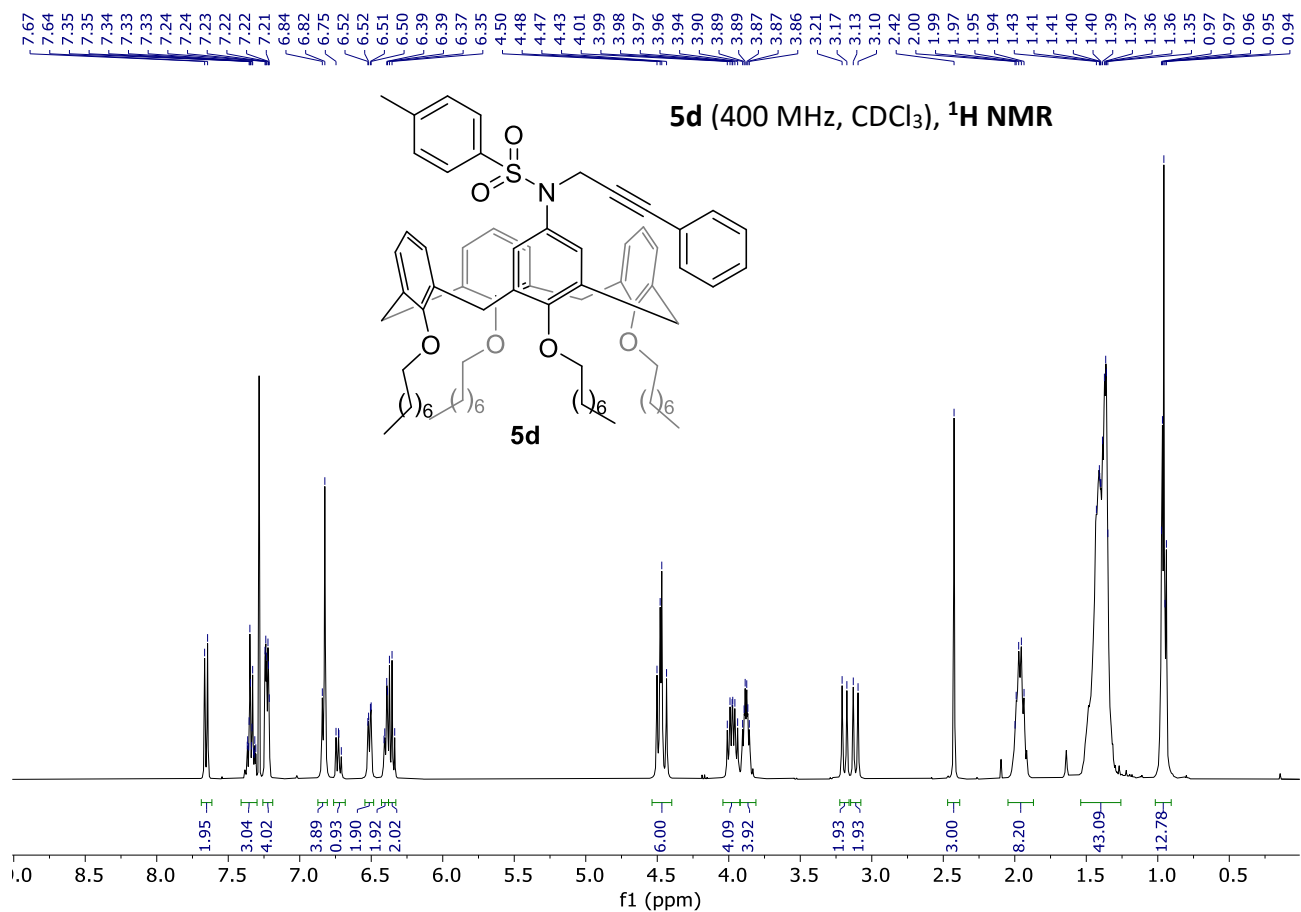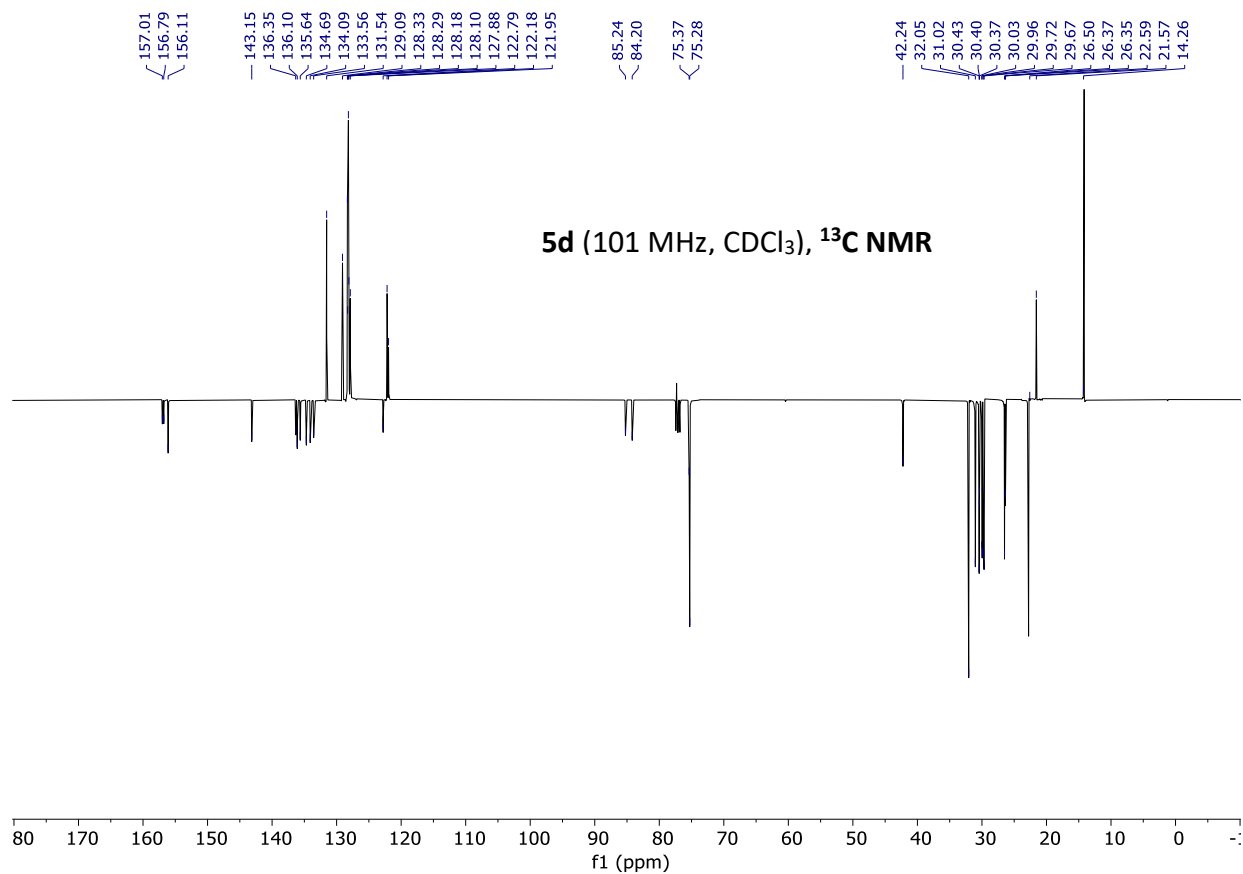

**Substrate 5e:**

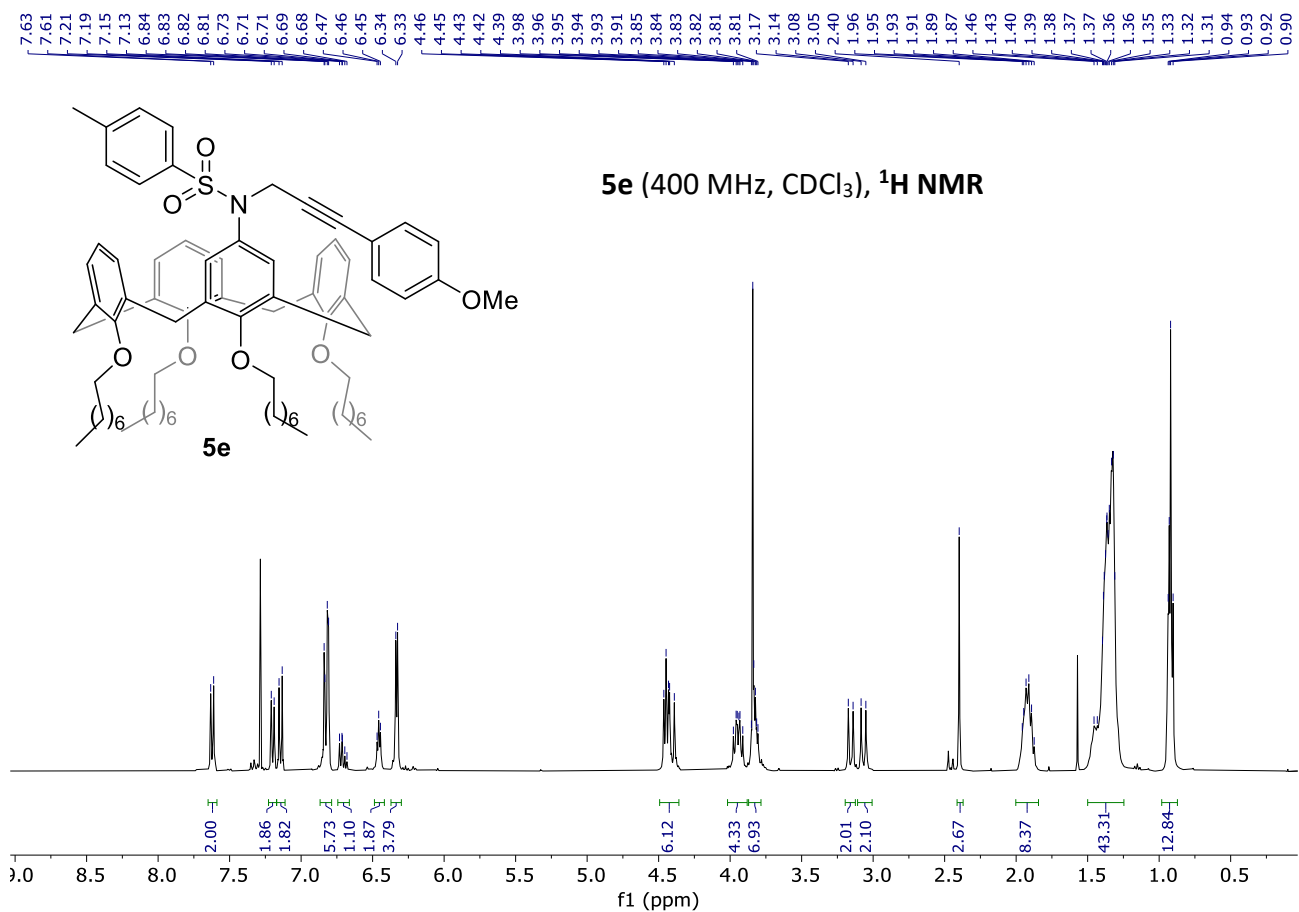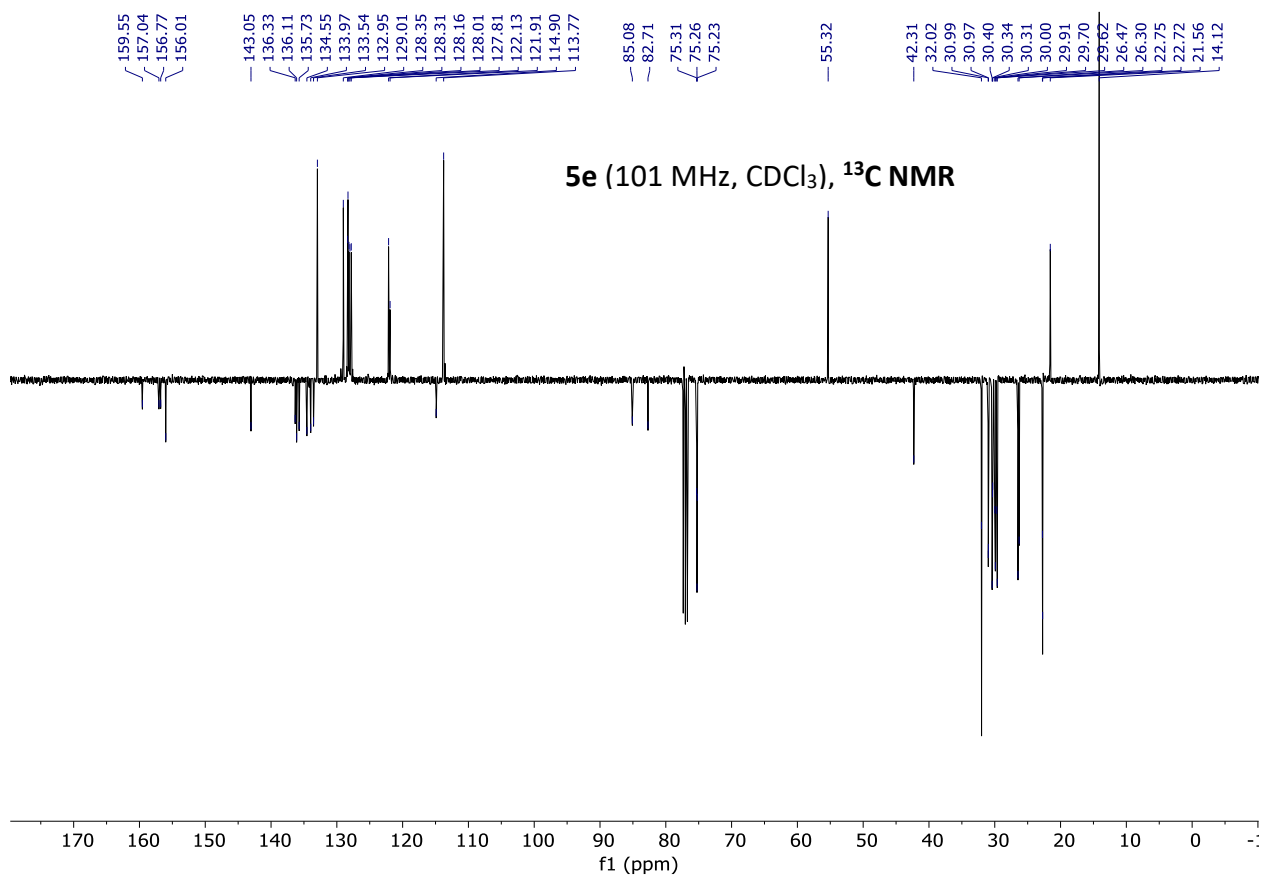

**Substrate 5f:**

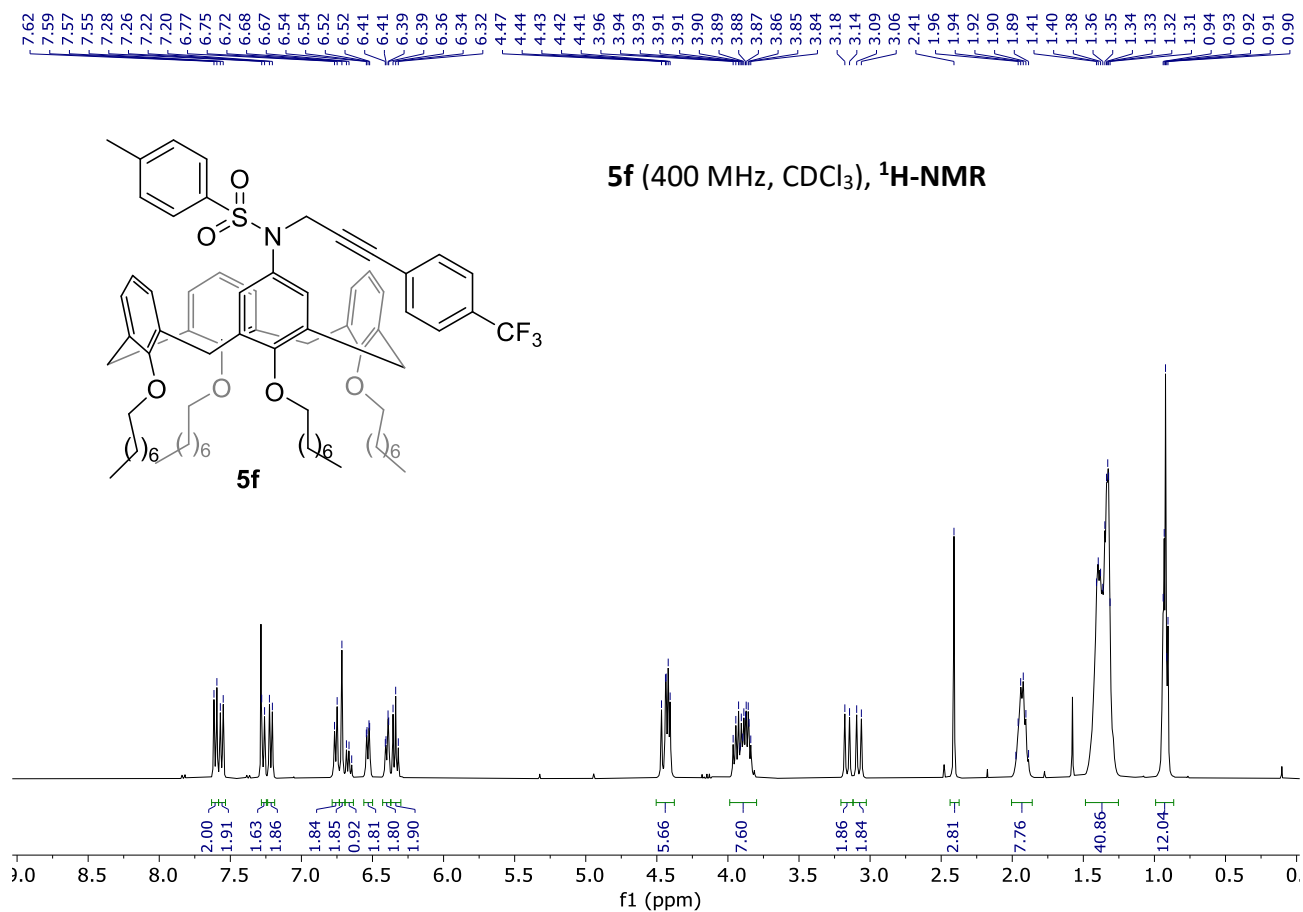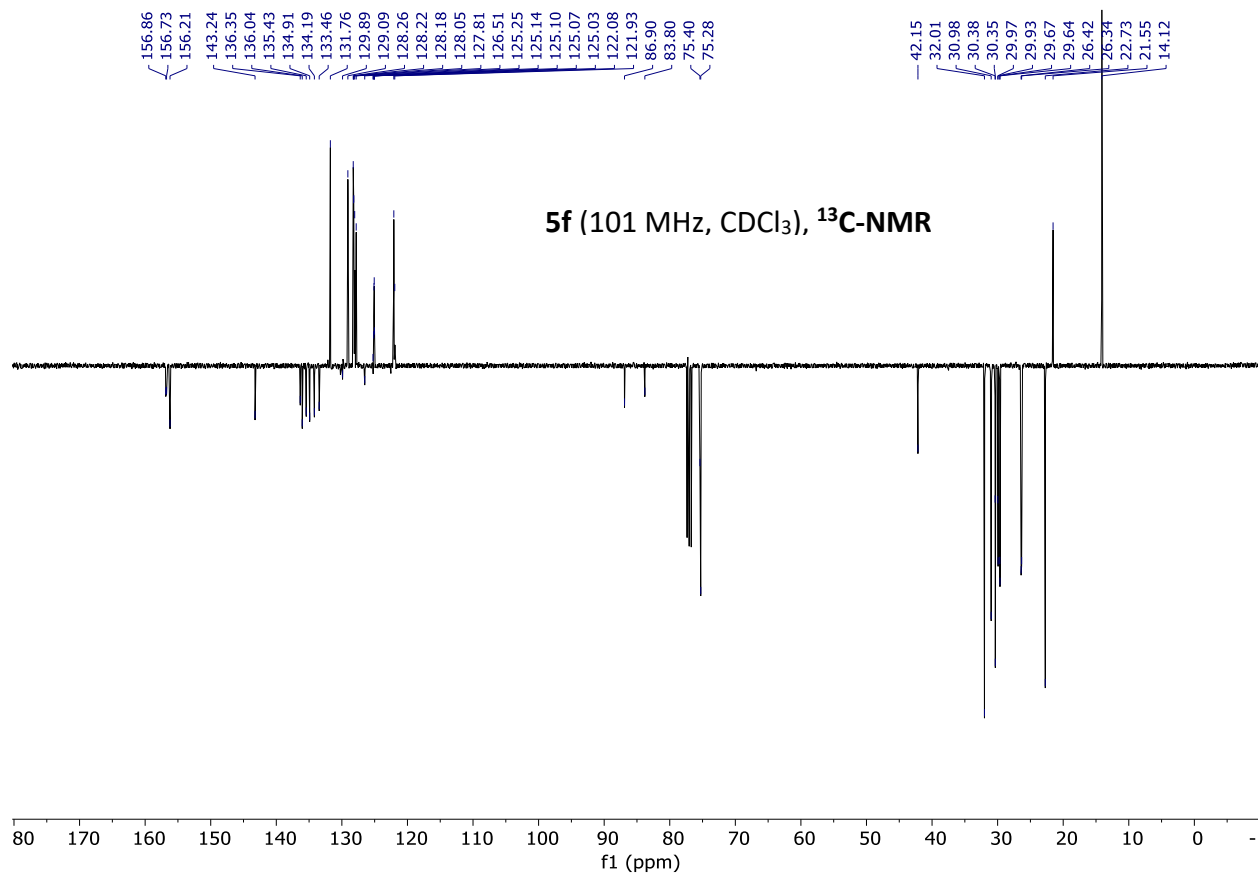

-62.70

**5f (565 MHz, CDCl<sub>3</sub>), <sup>19</sup>F-NMR**

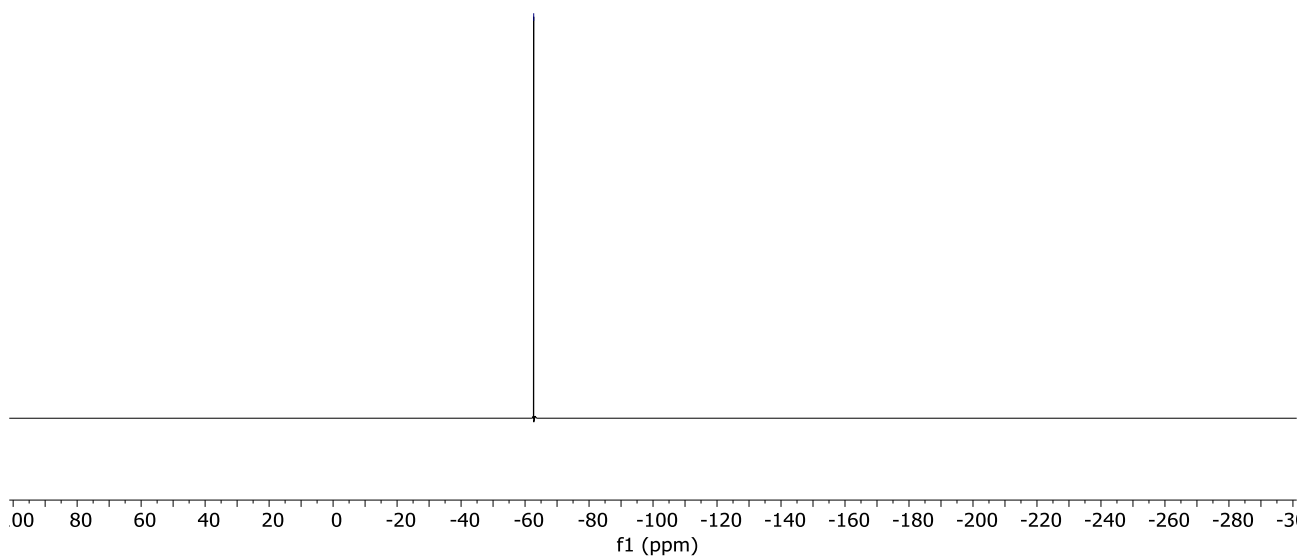



**Substrate 5g:**

7.61, 7.59, 7.44, 7.42, 7.22, 7.22, 7.20, 7.04, 7.02, 6.78, 6.77, 6.73, 6.69, 6.68, 6.67, 6.66, 6.52, 6.51, 6.50, 6.49, 6.37, 6.36, 6.35, 6.33, 6.32, 4.47, 4.44, 4.44, 4.40, 4.40, 3.93, 3.91, 3.91, 3.90, 3.89, 3.88, 3.88, 3.86, 3.85, 3.83, 3.83, 3.81, 3.81, 3.79, 3.18, 3.14, 3.09, 3.05, 2.41, 1.98, 1.97, 1.96, 1.96, 1.94, 1.92, 1.92, 1.90, 1.04, 1.03, 1.02, 1.02, 1.01, 1.00, 0.99, 0.99

**5g (400 MHz, CDCl<sub>3</sub>), <sup>1</sup>H-NMR**

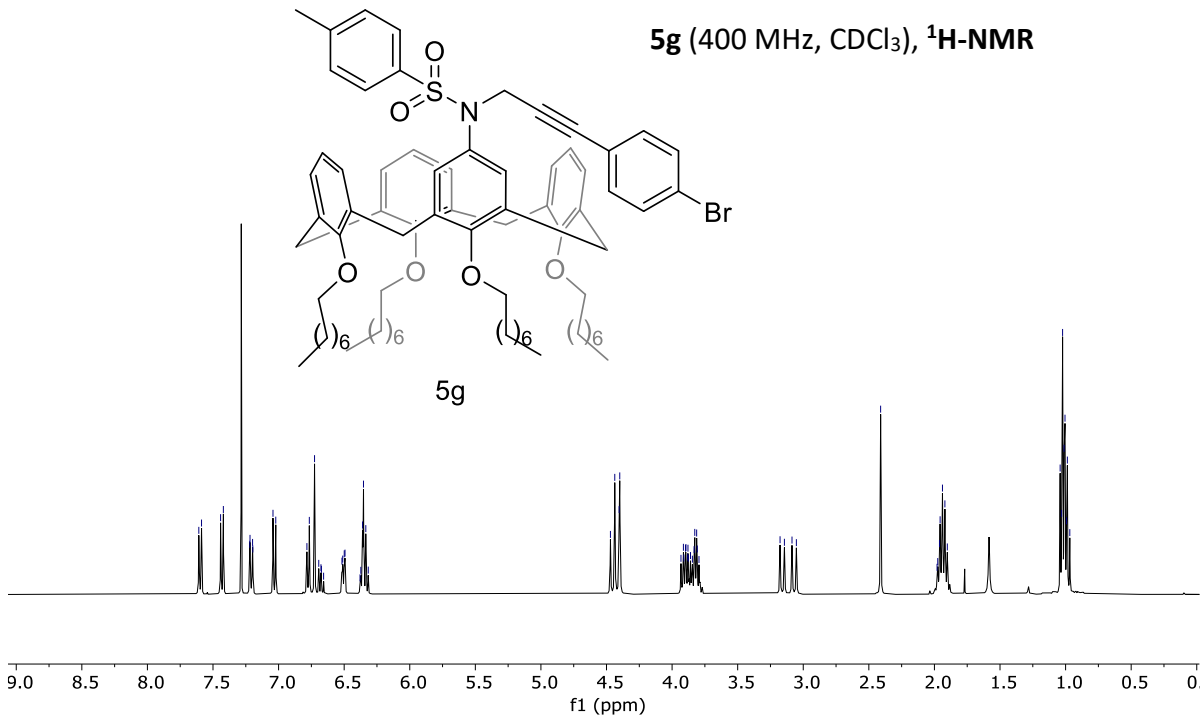

156.89, 156.73, 156.10, 143.19, 136.31, 135.49, 134.77, 134.09, 133.45, 132.95, 131.42, 129.06, 128.27, 128.14, 128.10, 127.81, 122.50, 122.11, 121.93, 121.67, 85.44, 84.09, 76.85, 76.79, 76.76, 42.20, 30.96, 23.26, 23.25, 23.20, 21.57, 10.40, 10.27, 10.23

**5g (101 MHz, CDCl<sub>3</sub>), <sup>13</sup>C-NMR**

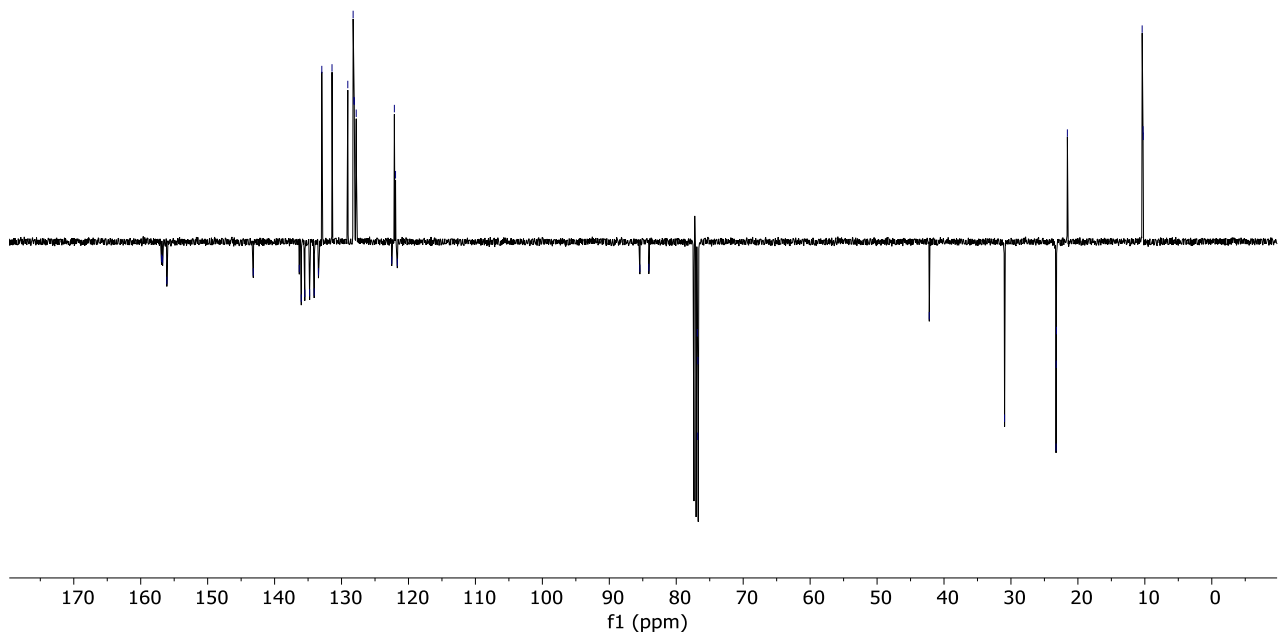

**Substrate 5h:**

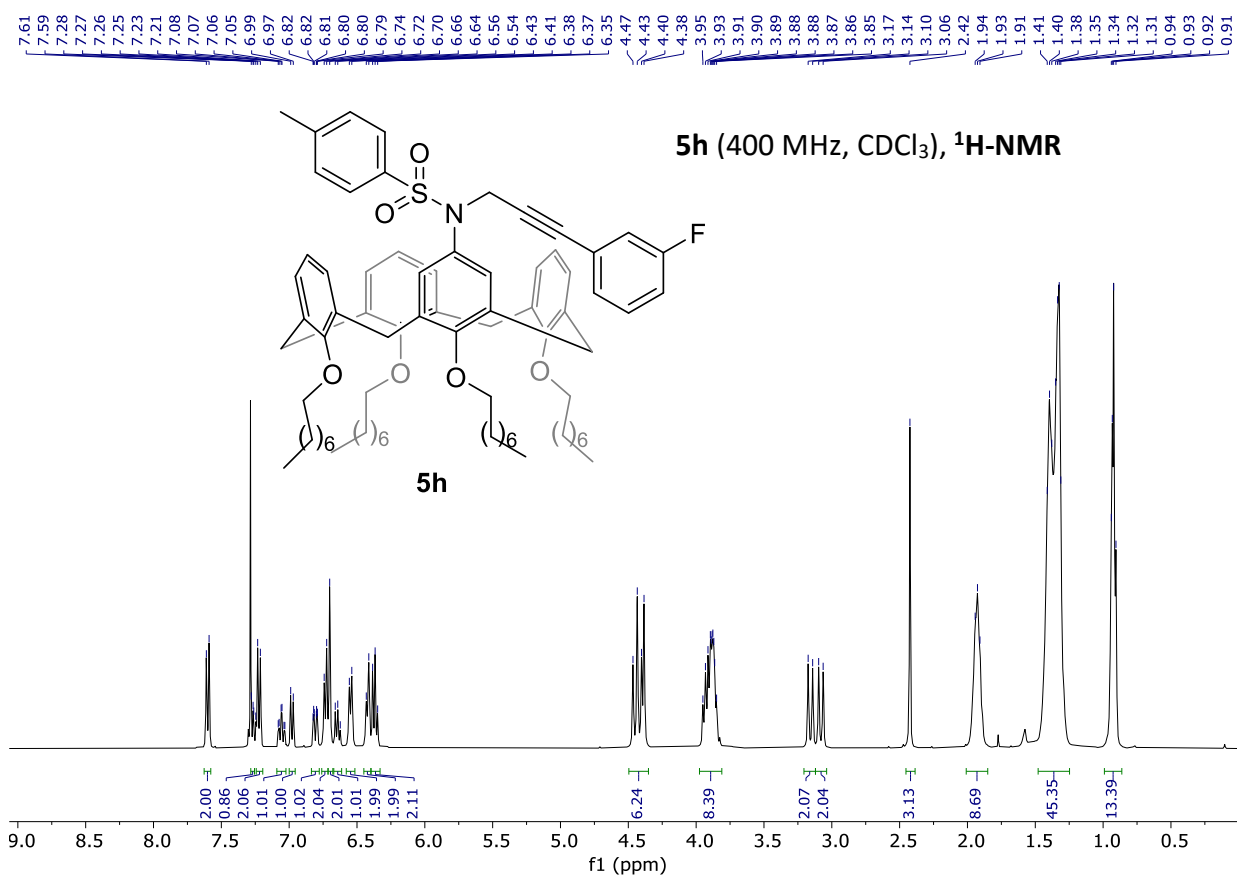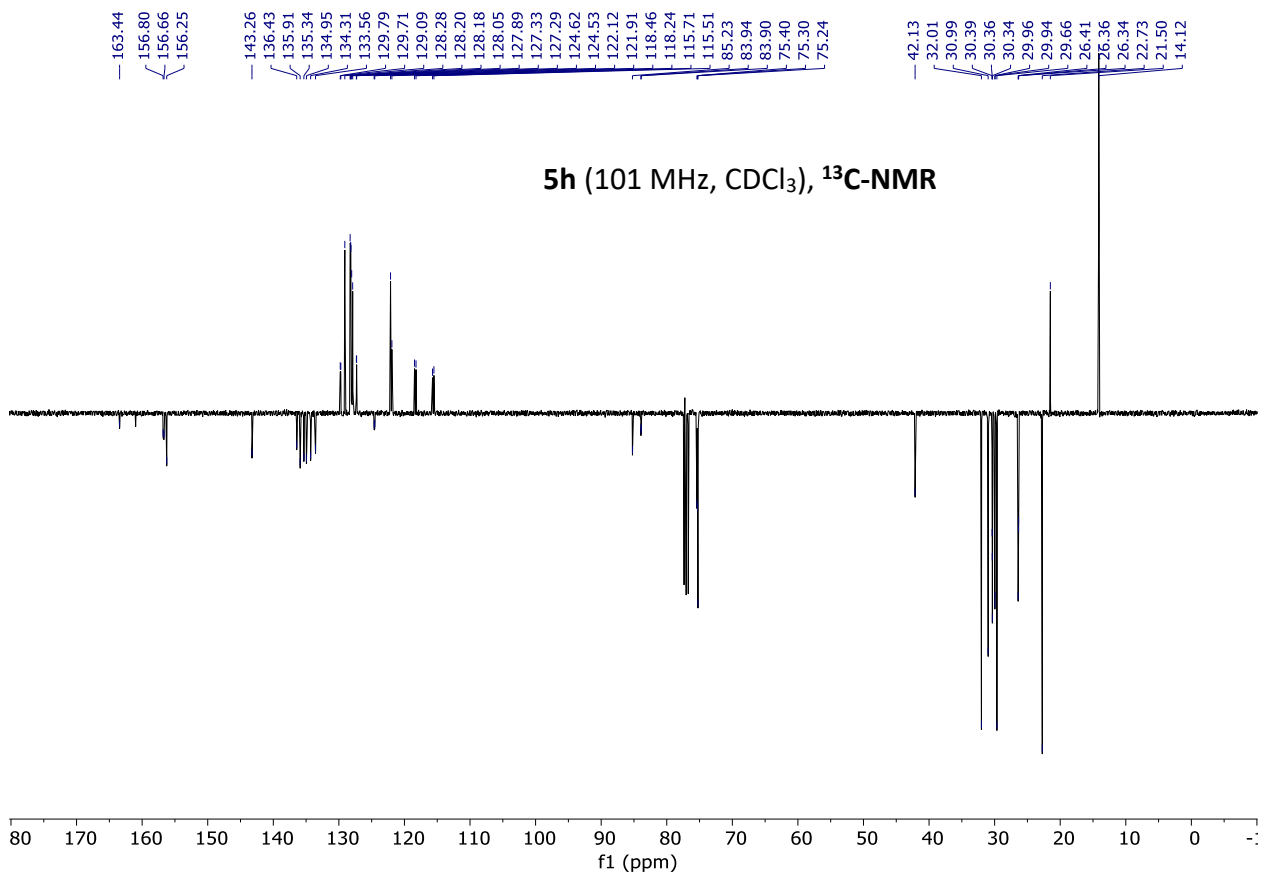

**5h (565 MHz, CDCl<sub>3</sub>), <sup>19</sup>F-NMR**

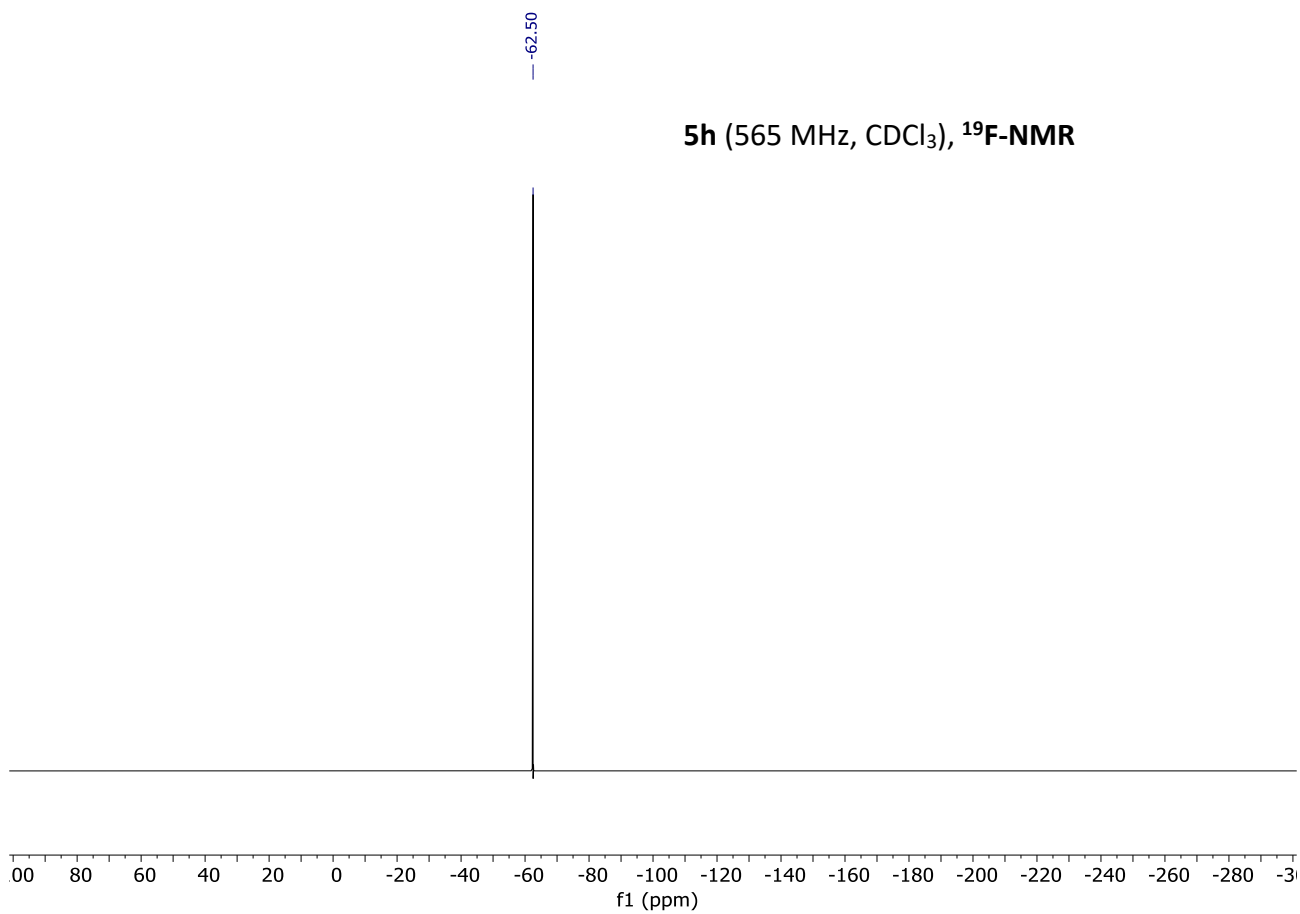

**Substrate 5i:**

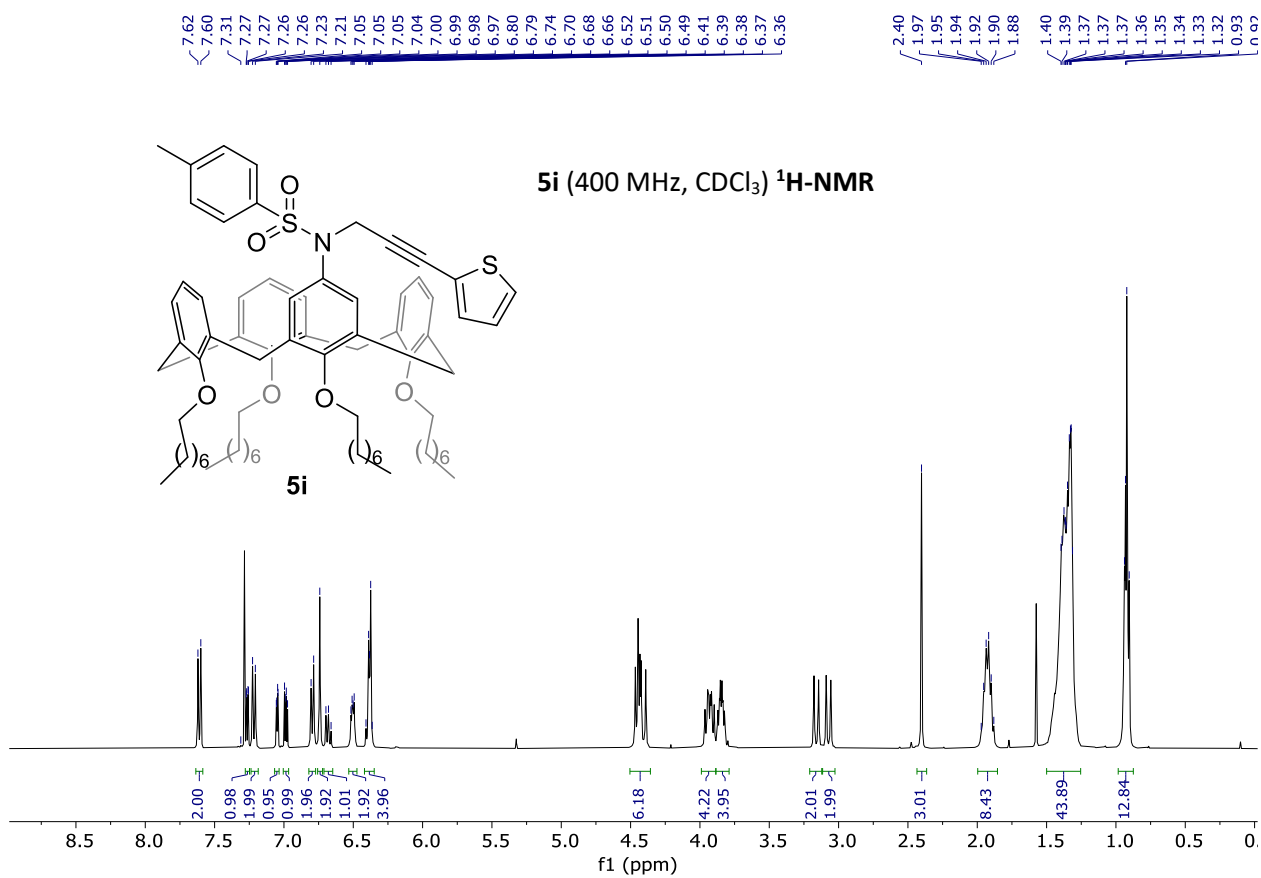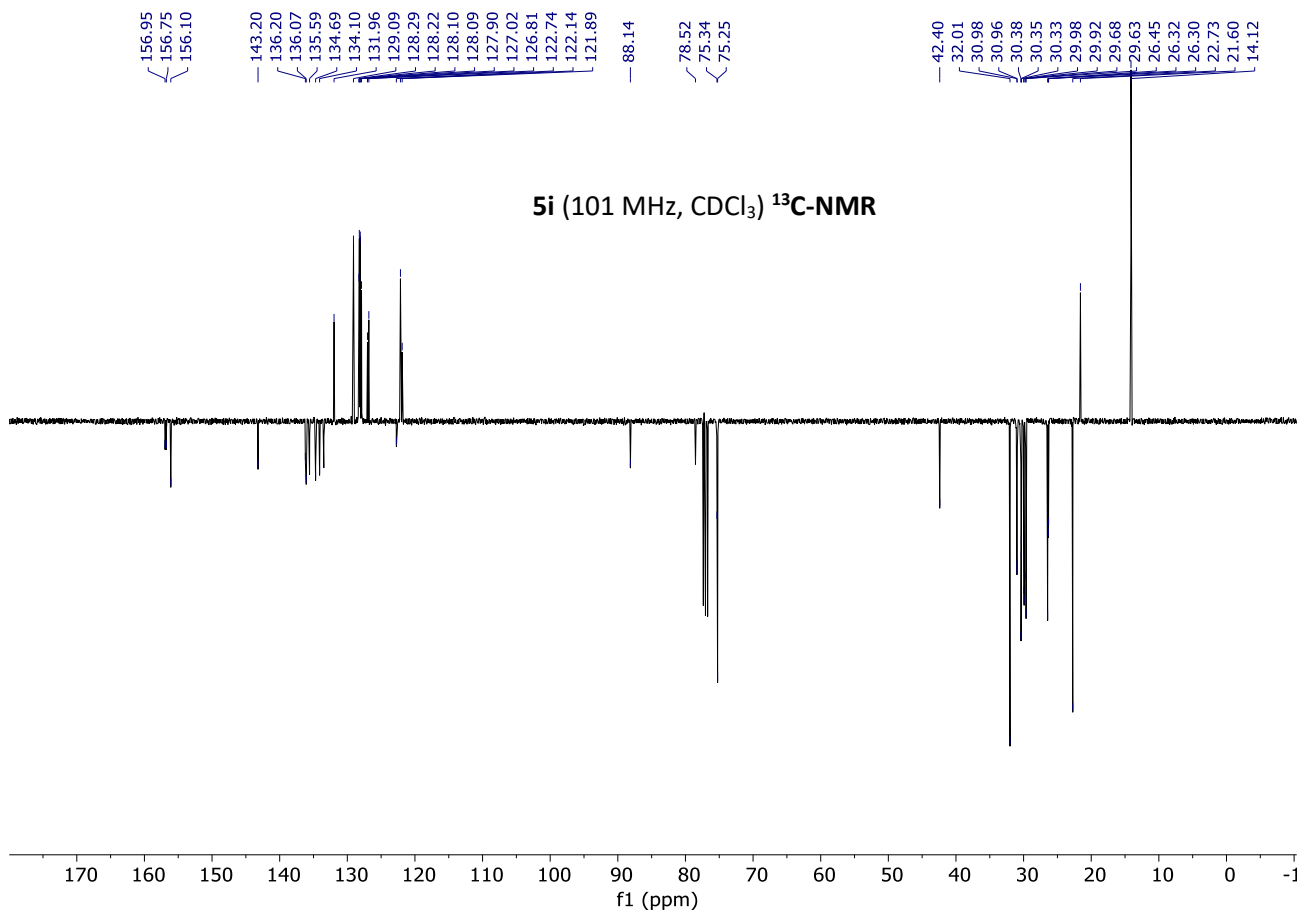

**Substrate 5j:**

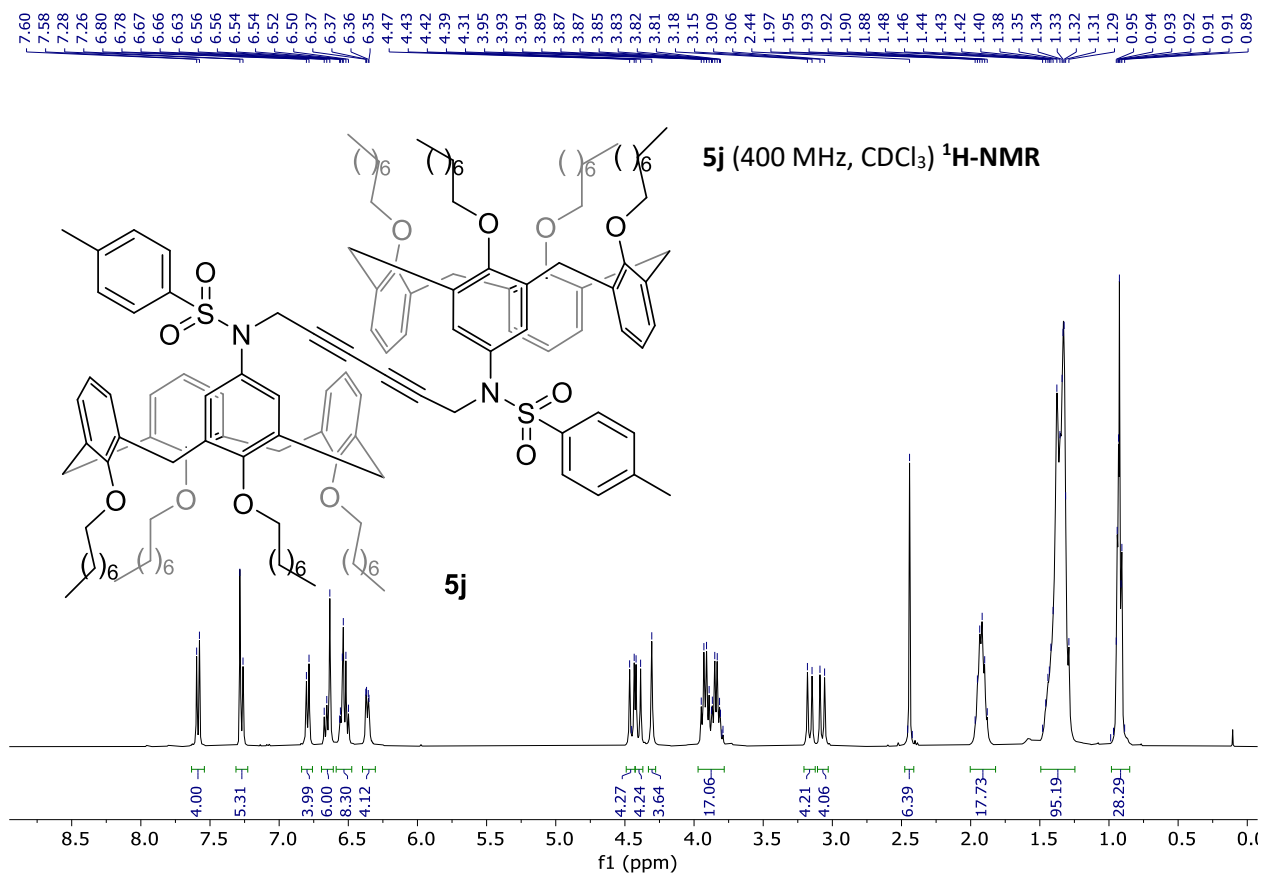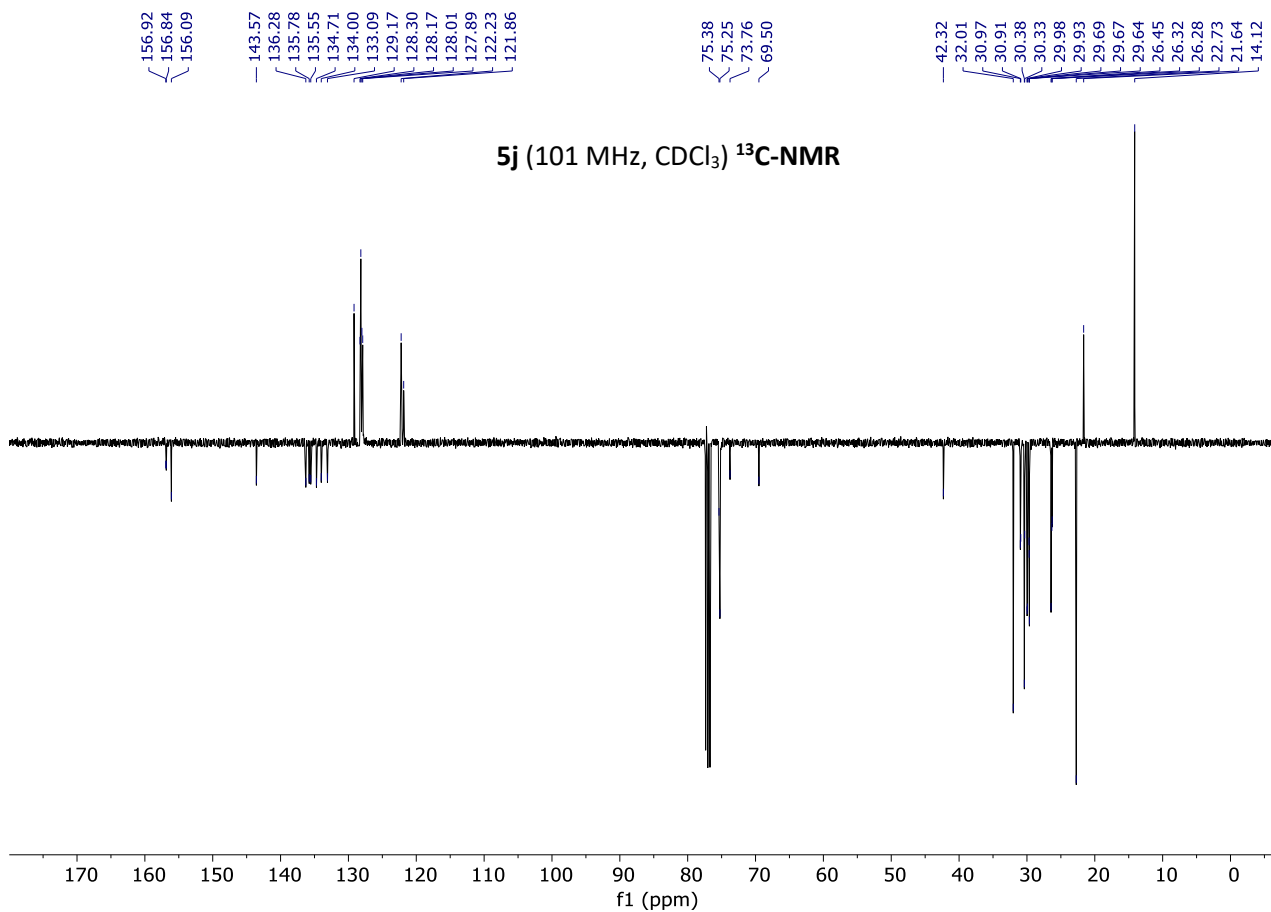

**Substrate 5k:**

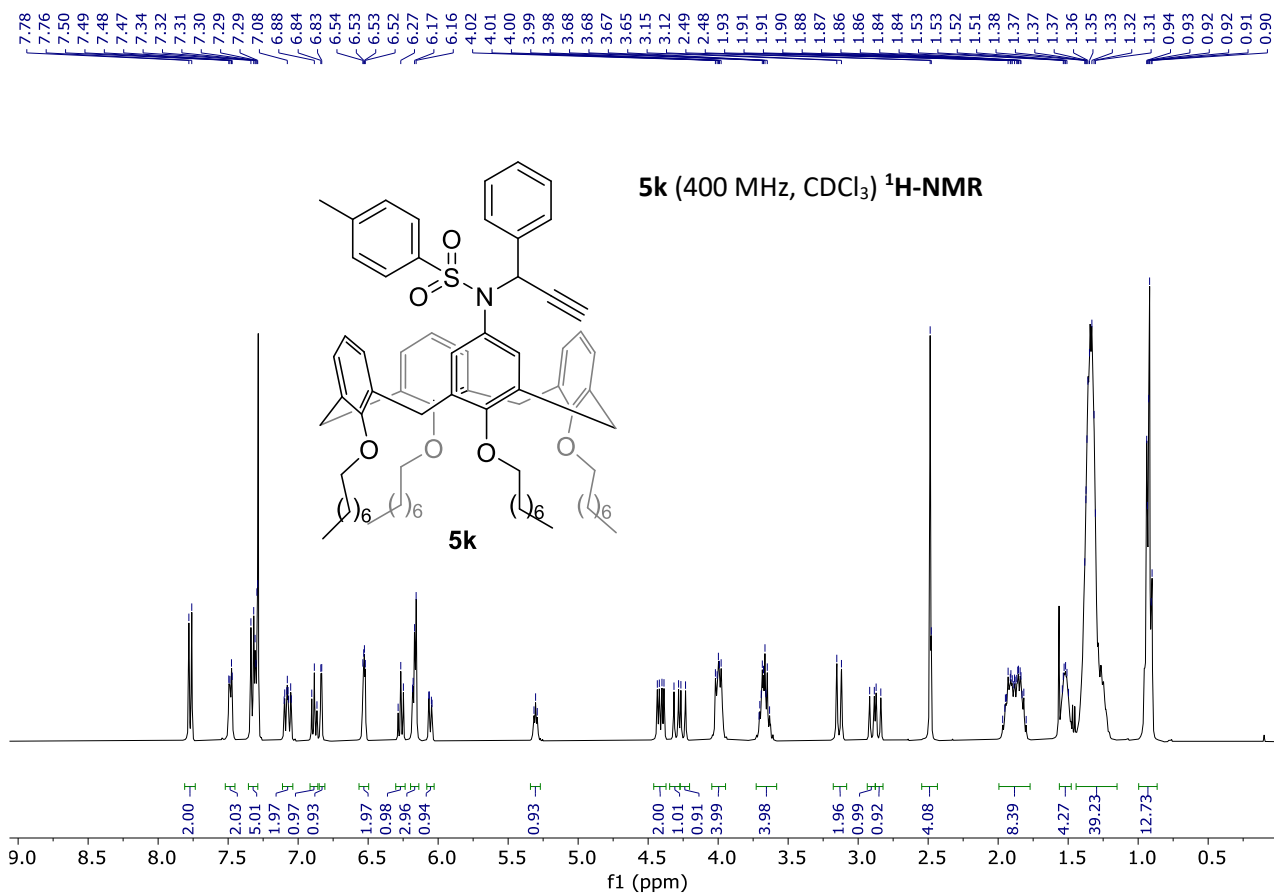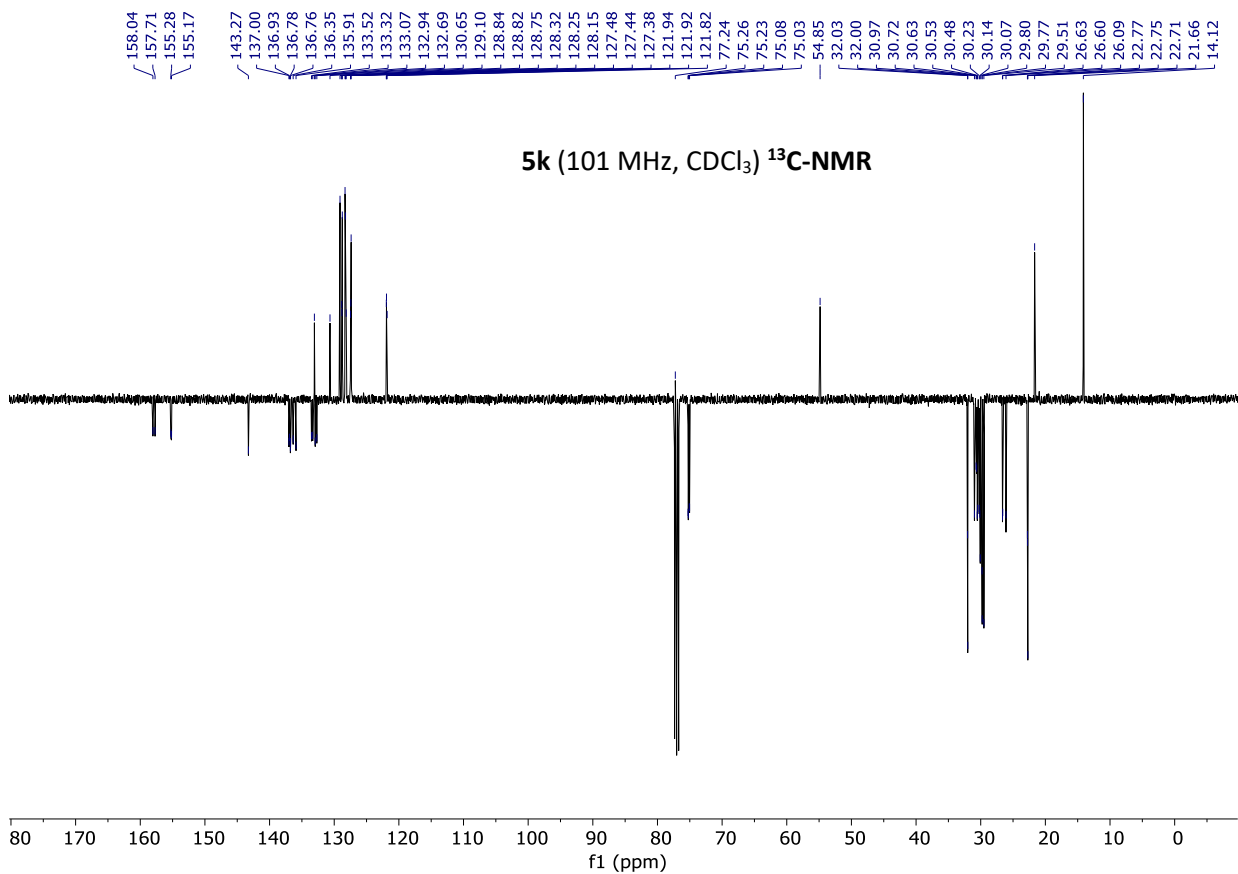

**Substrate 7a:**

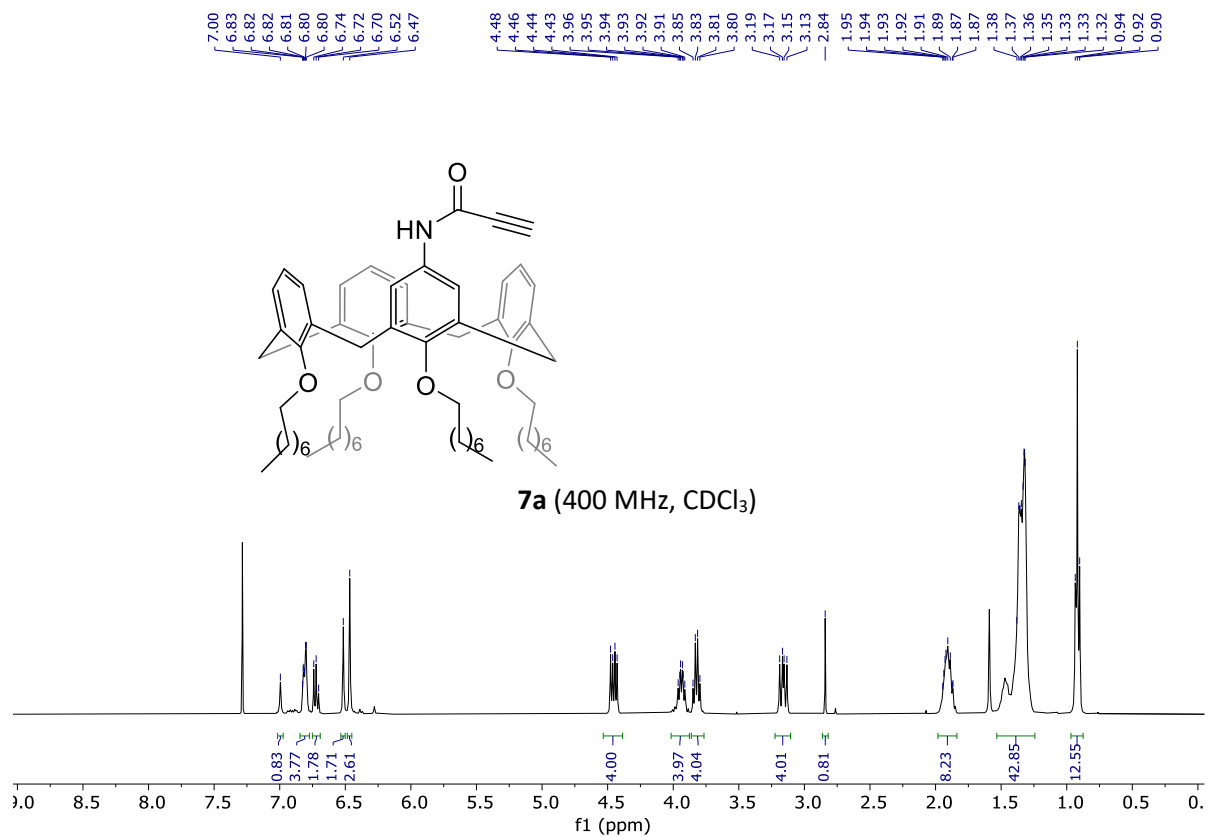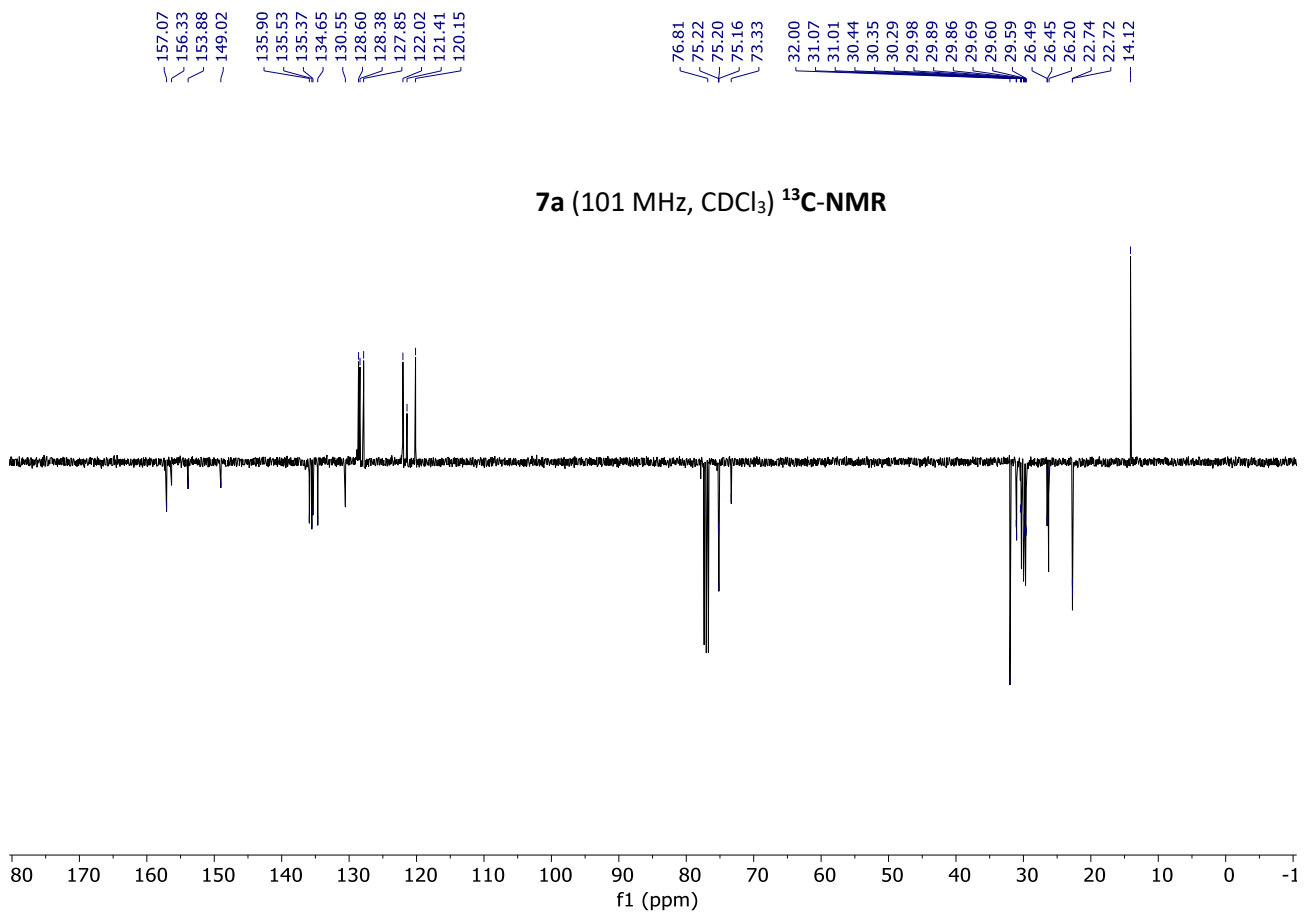





- NMR spectra of products:

**Product 2a:**

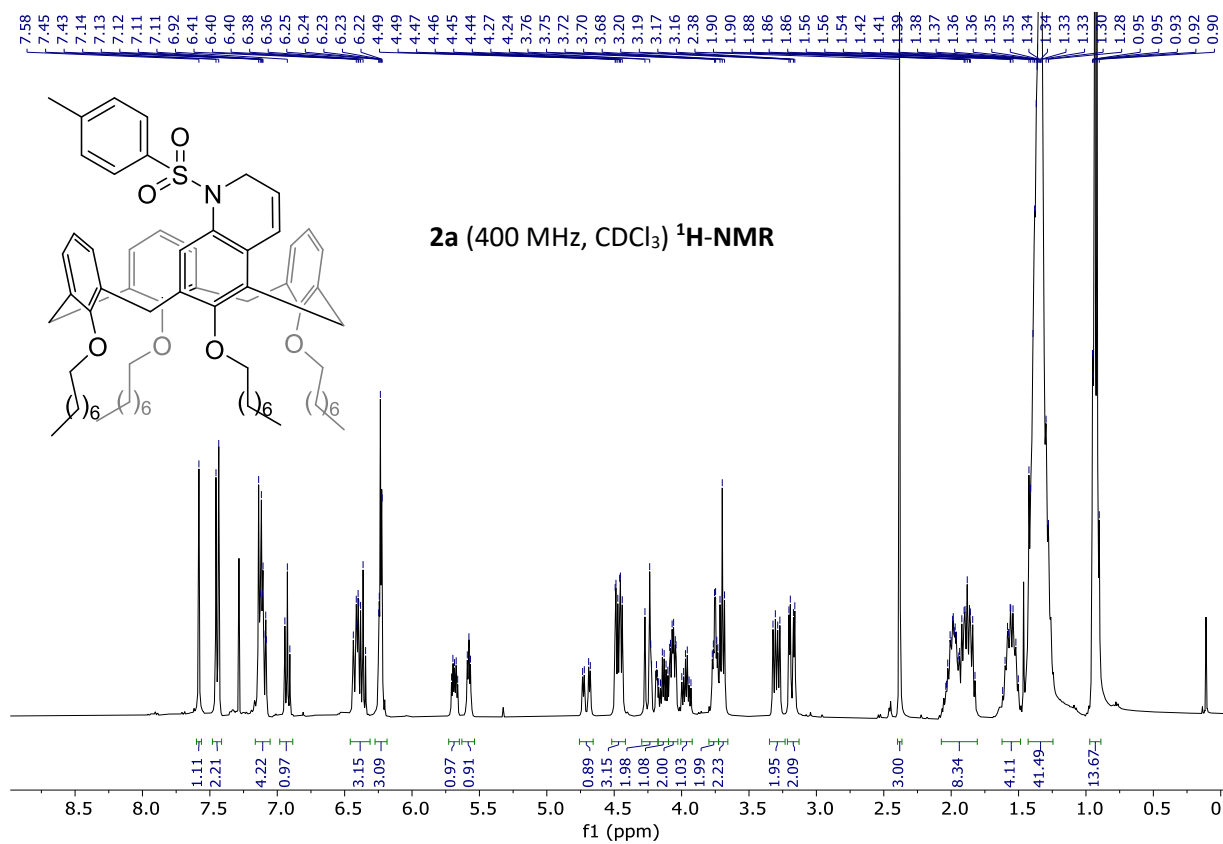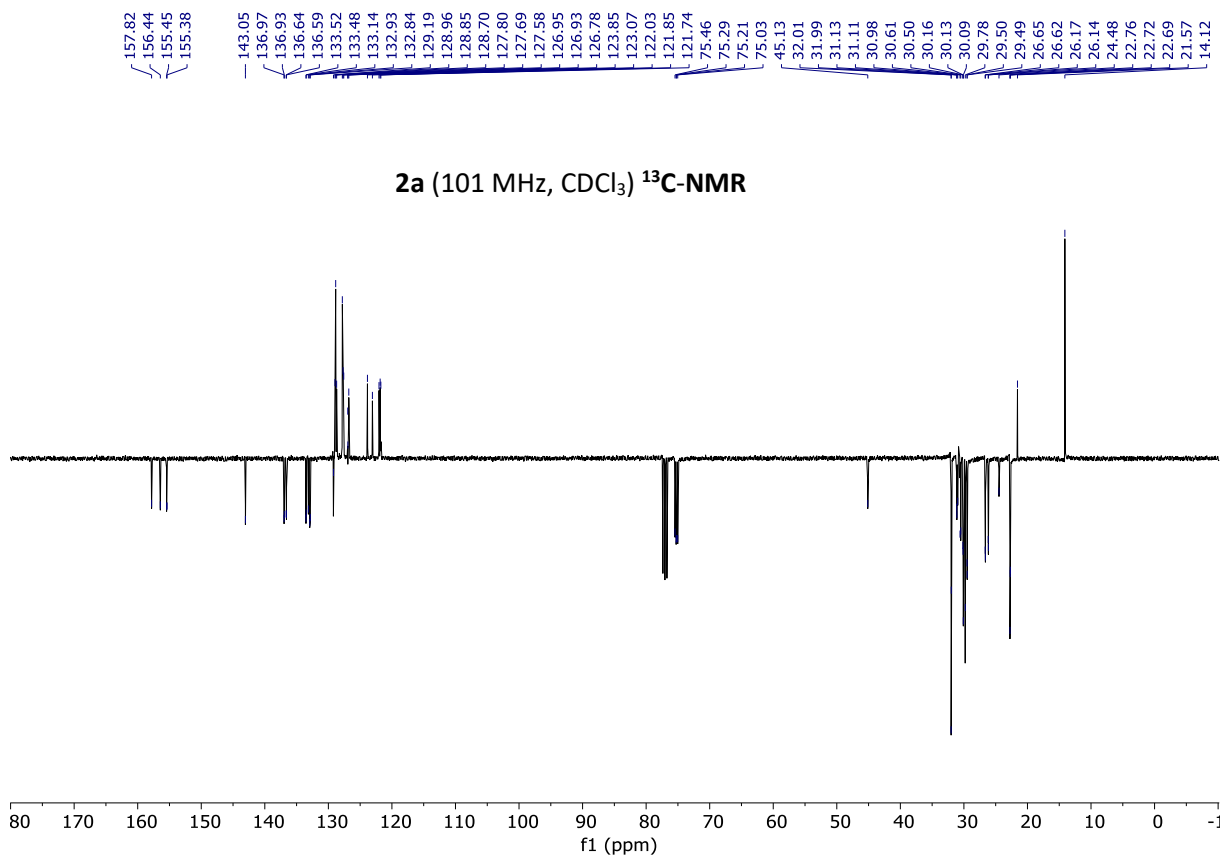

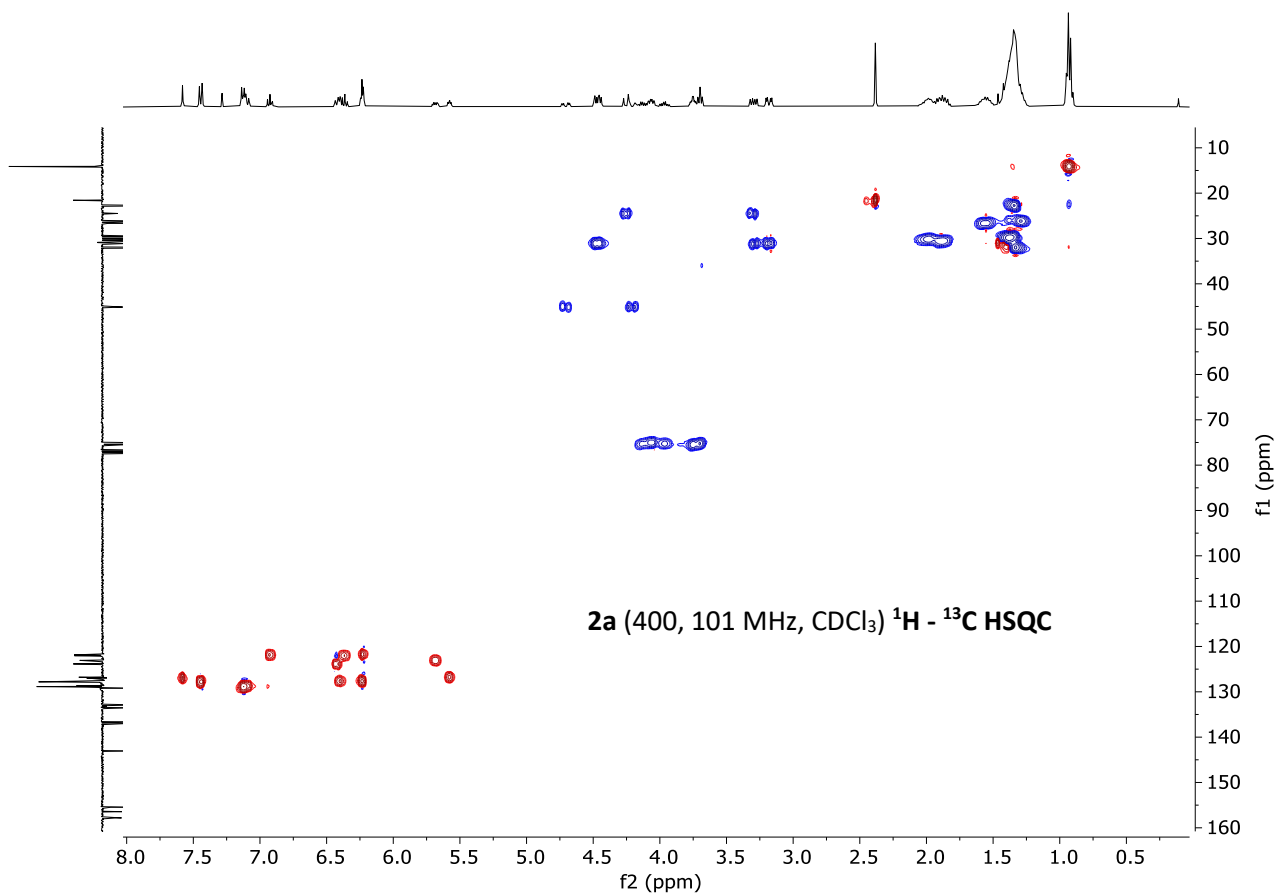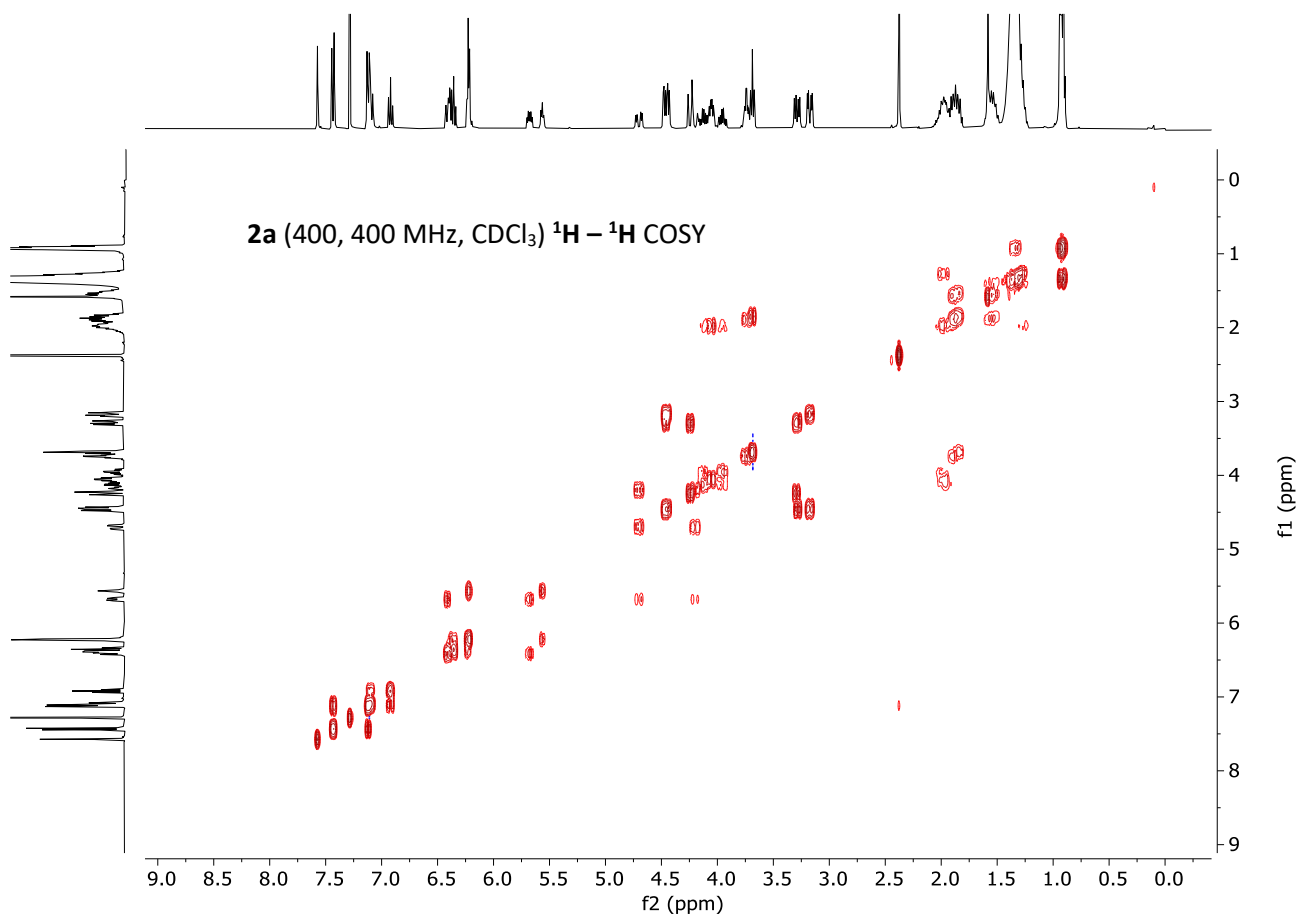



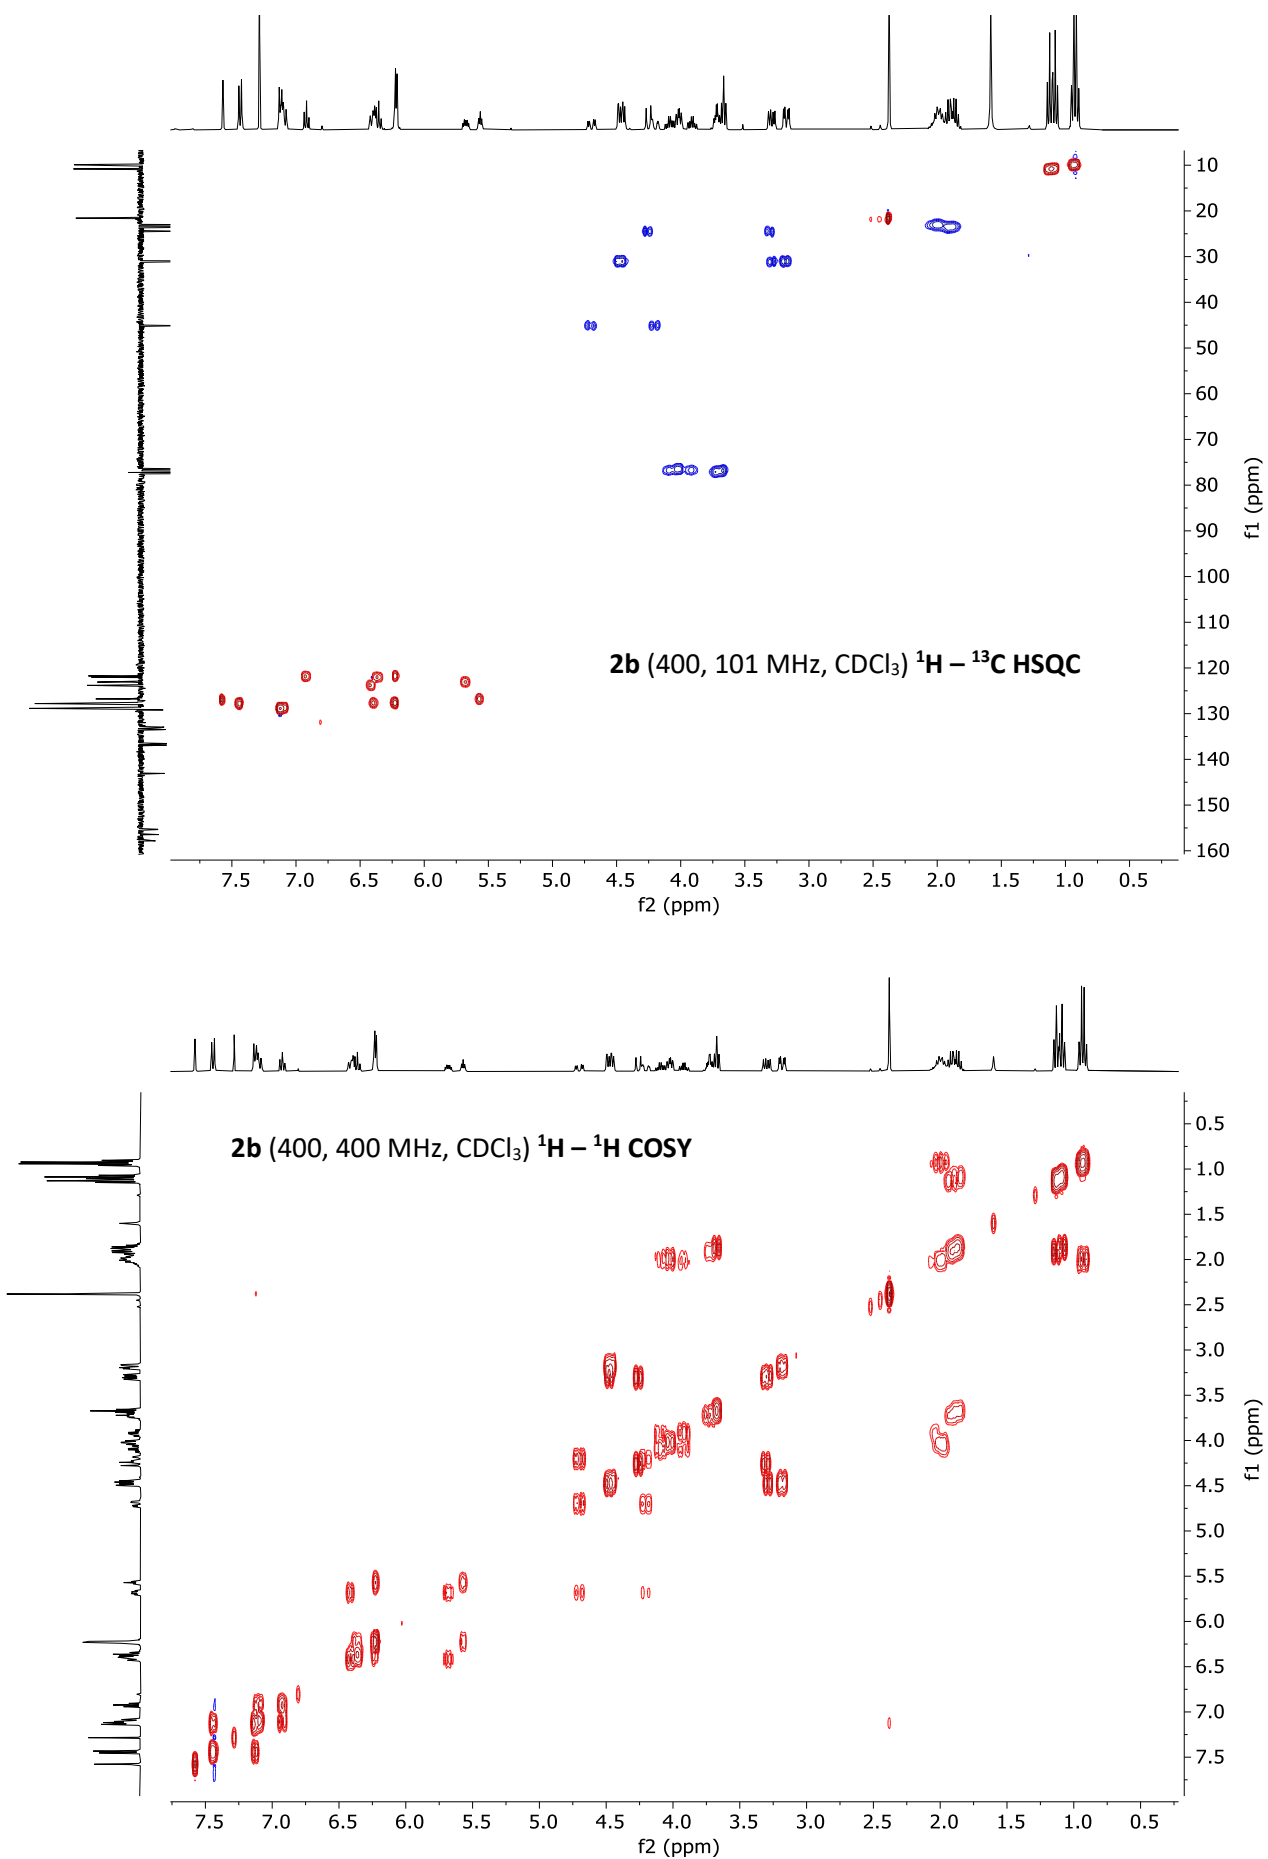

### Product 2c:

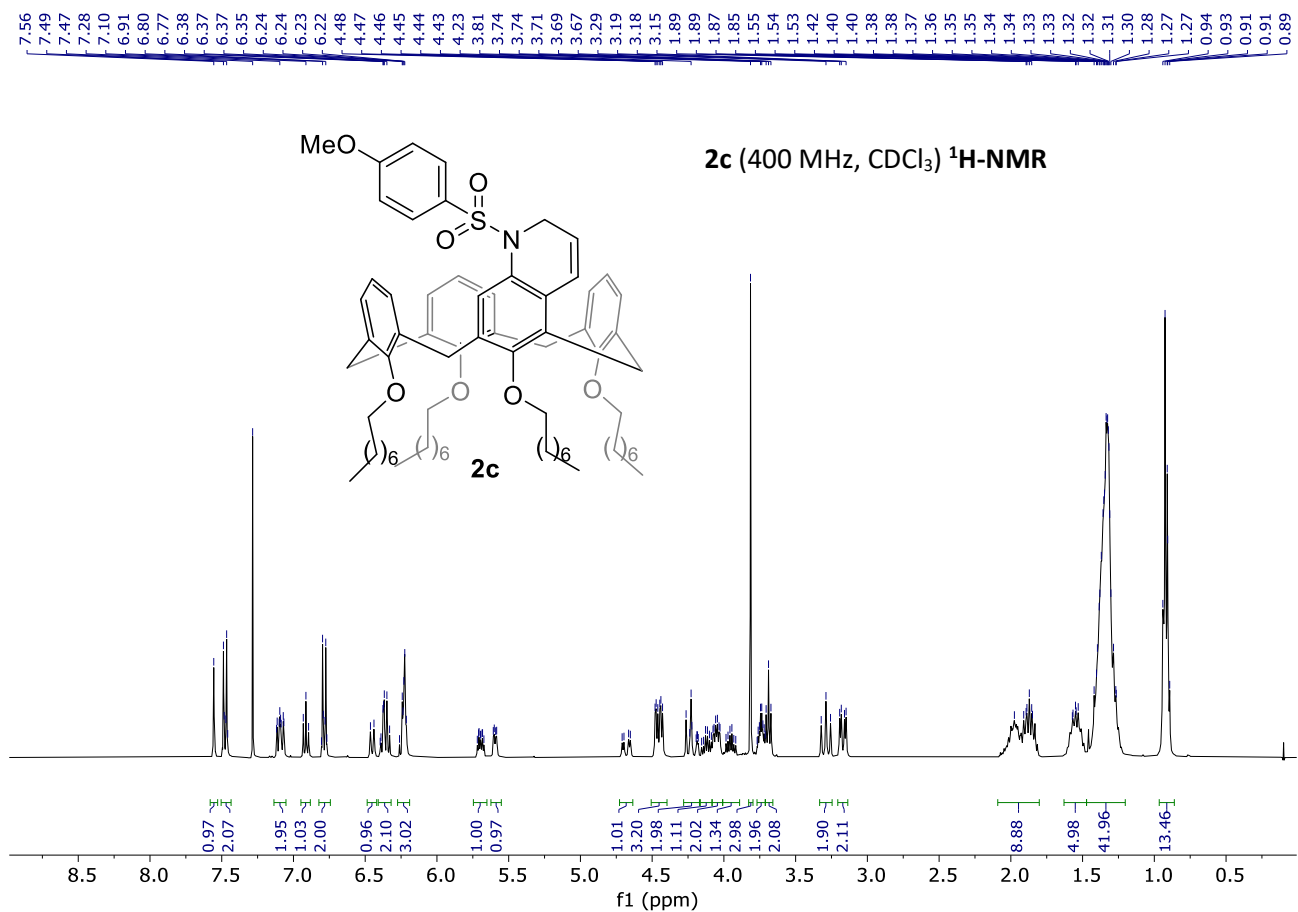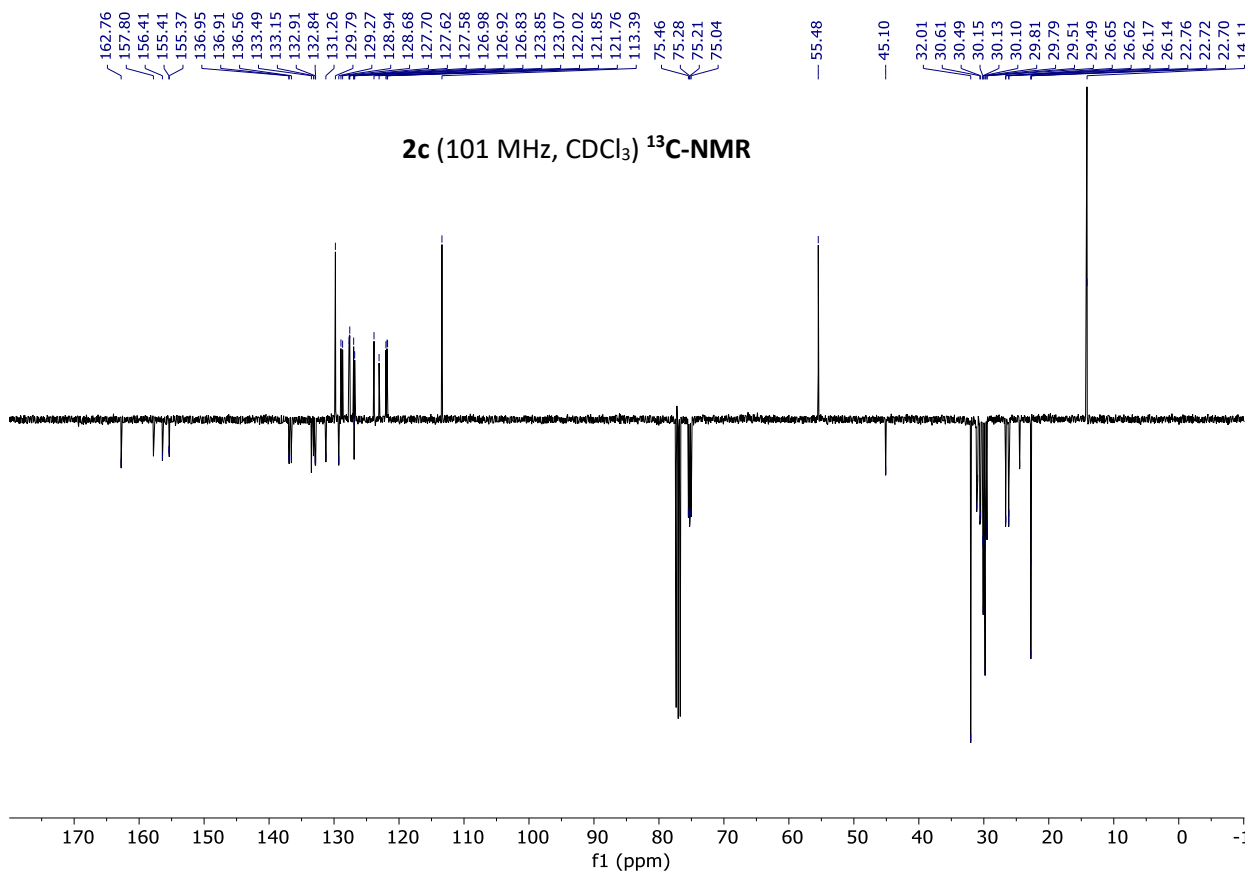

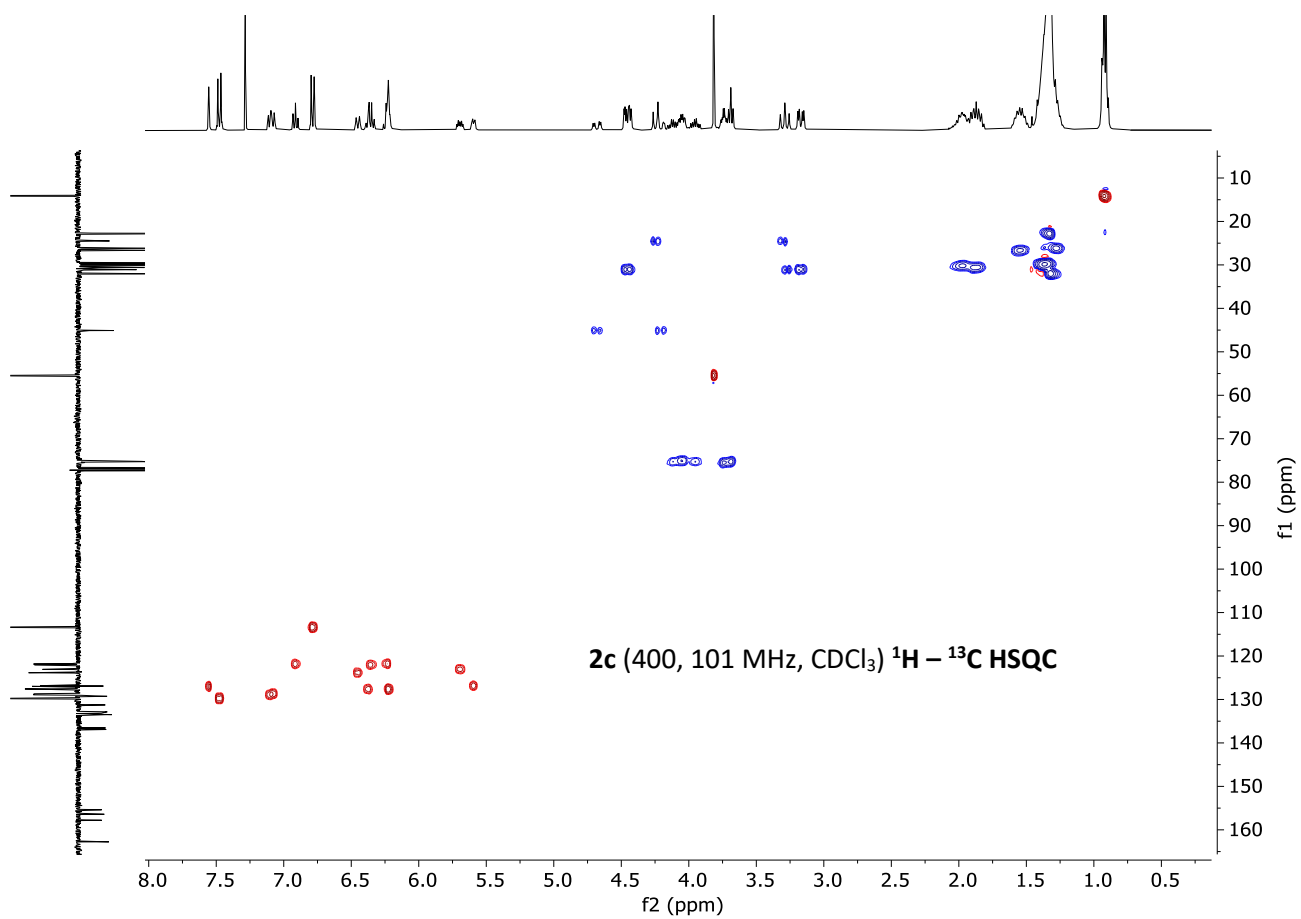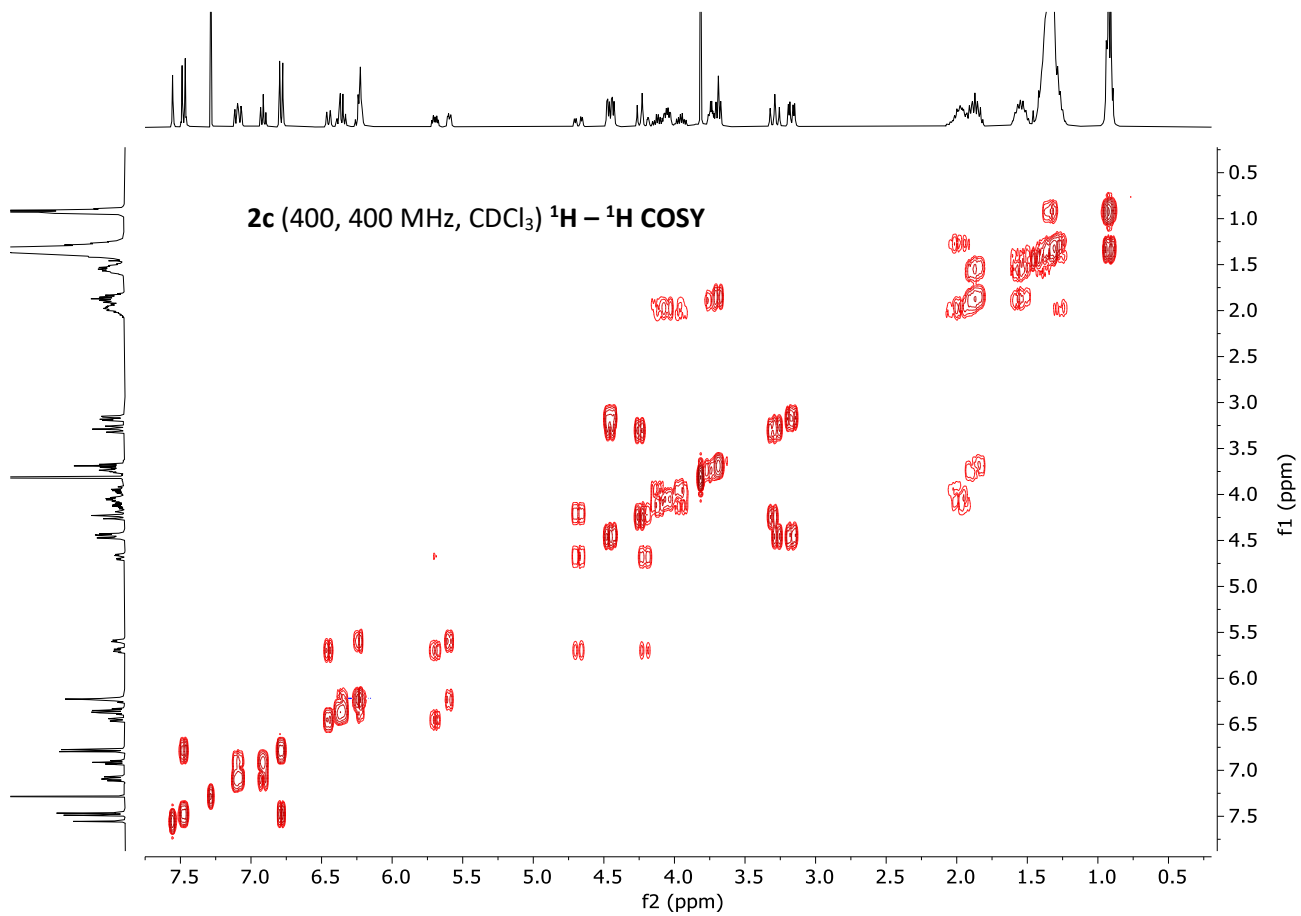

**Product 2d:**

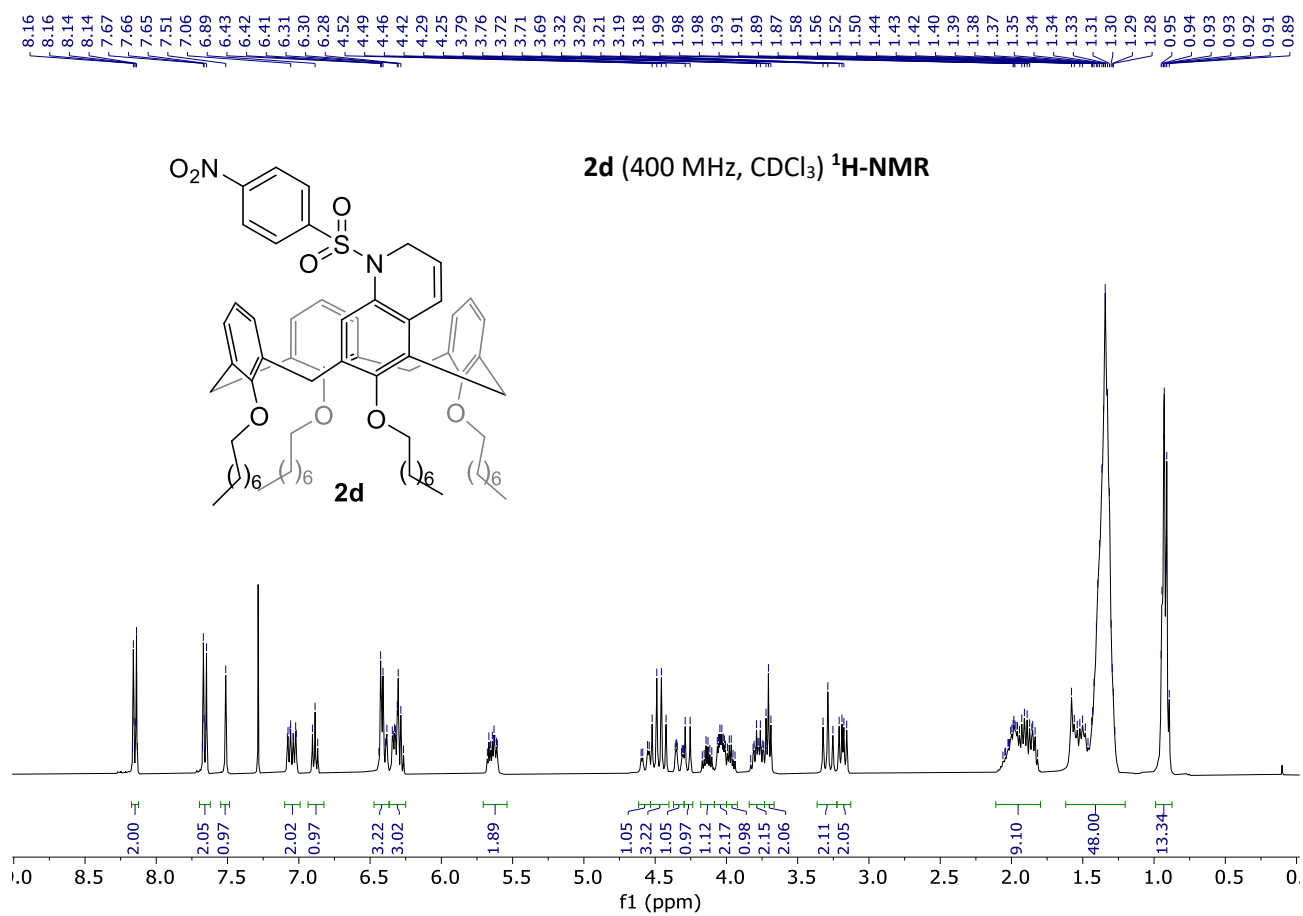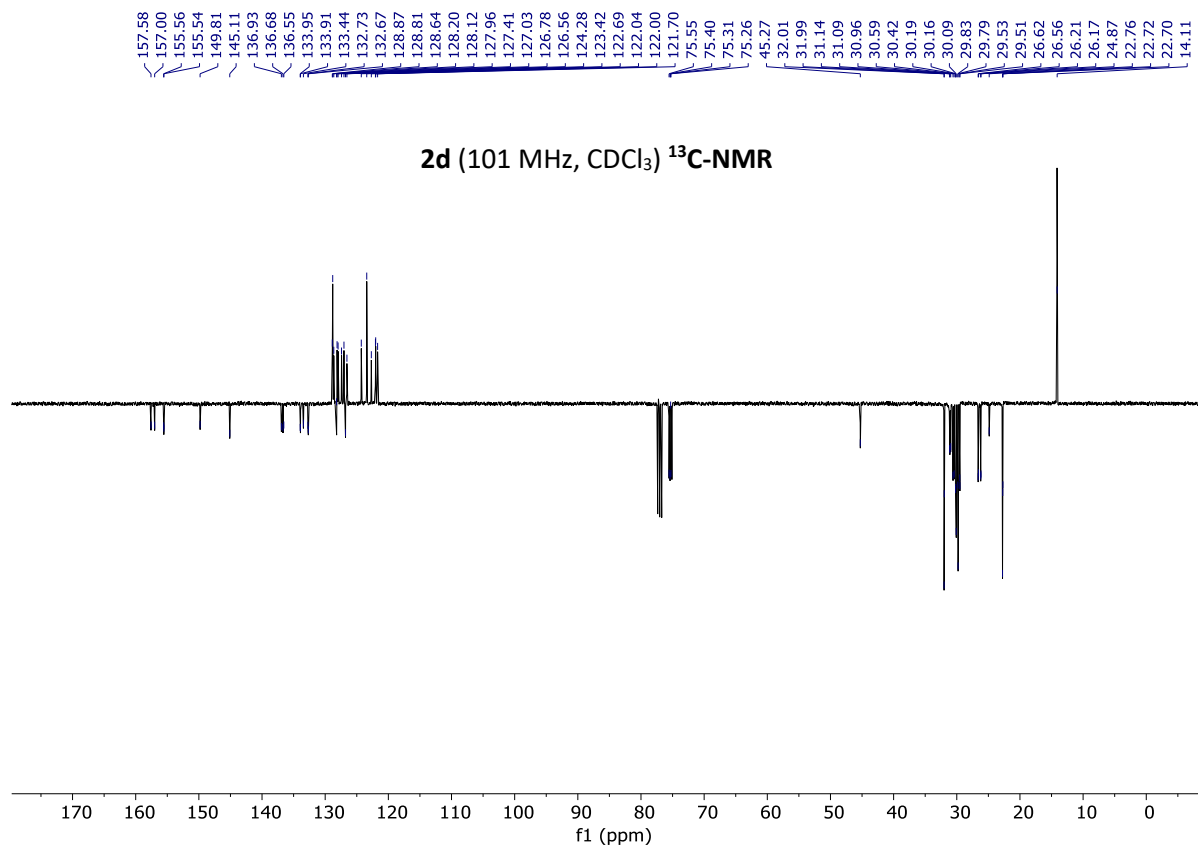

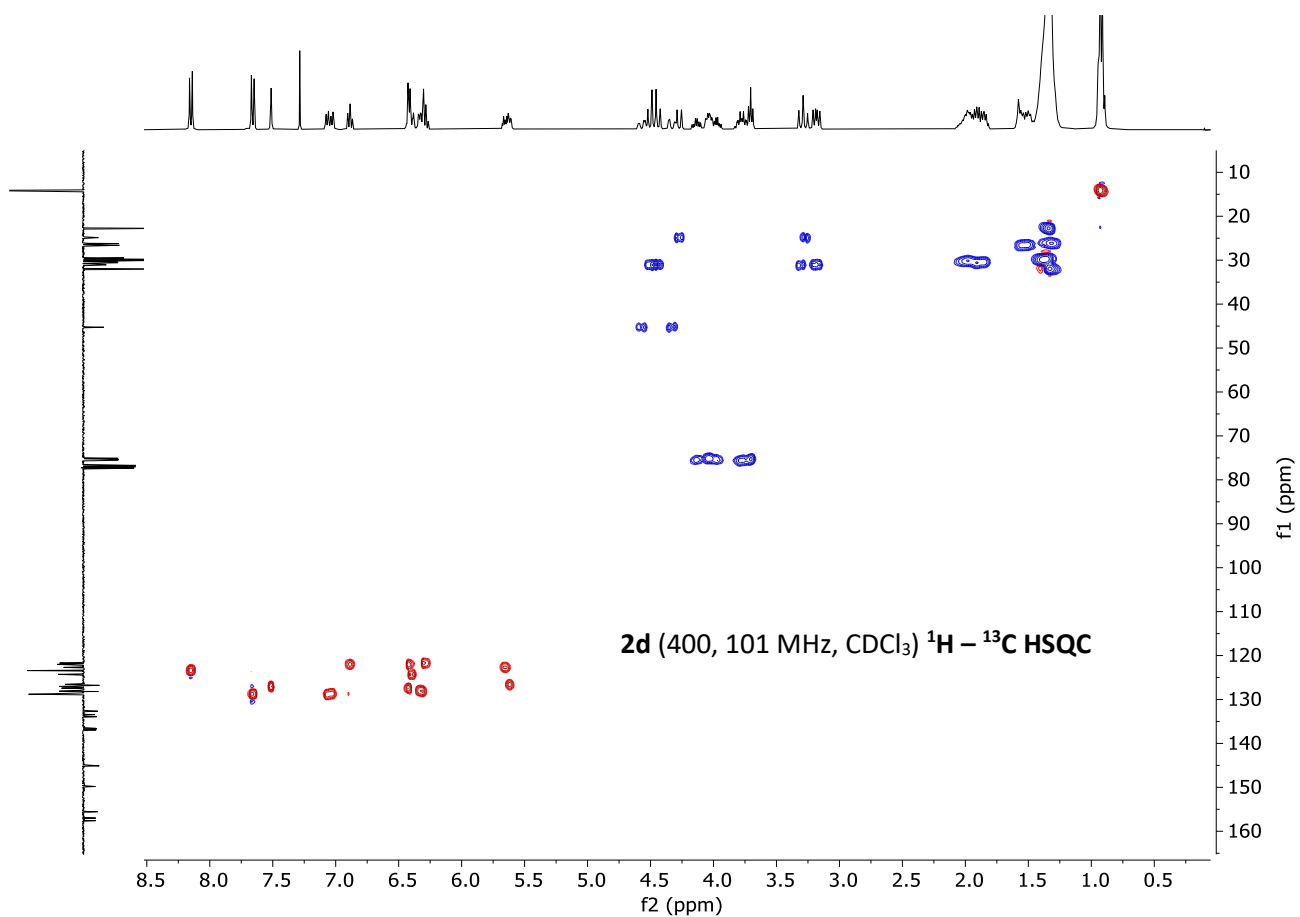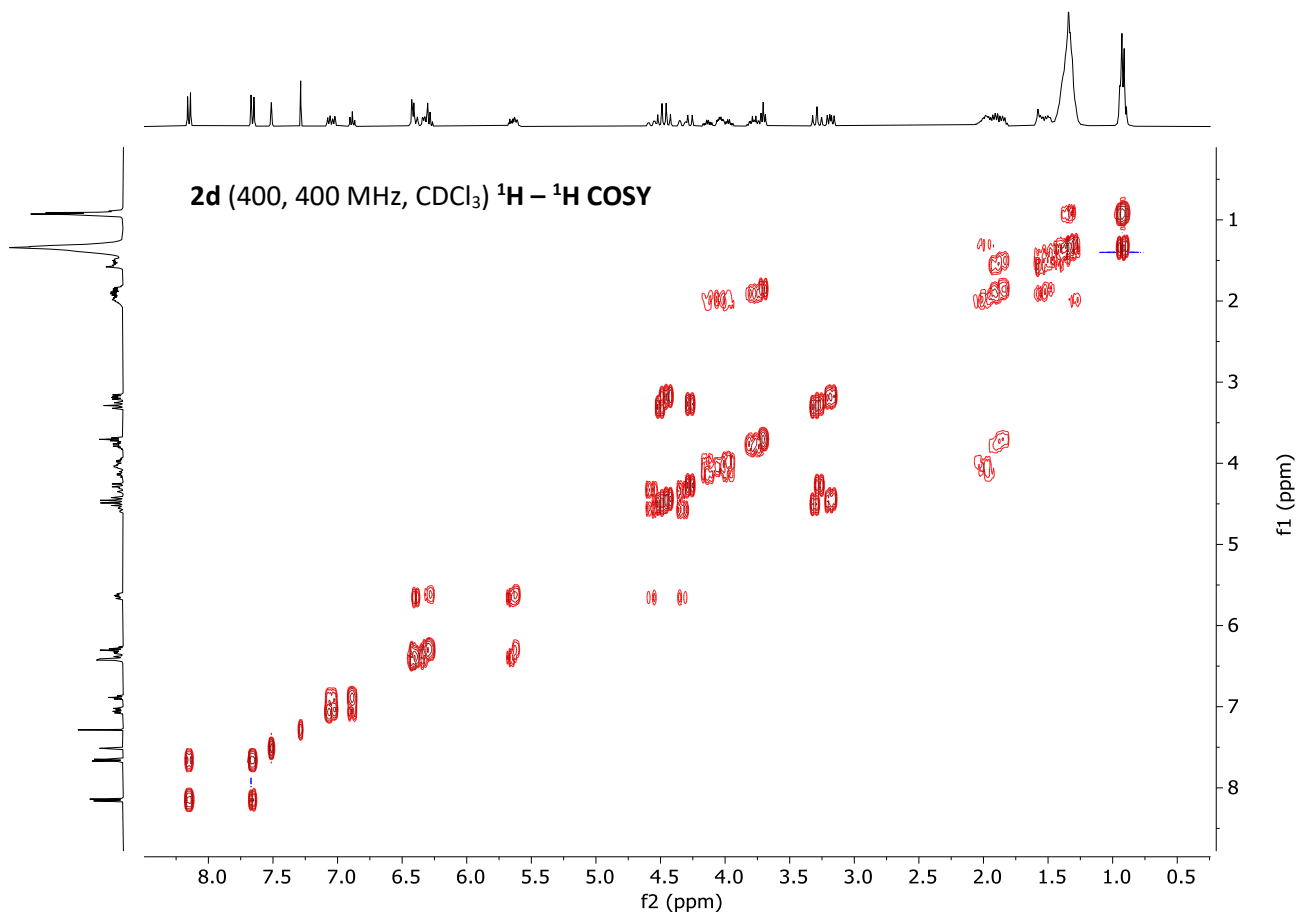



**Product 2e:**

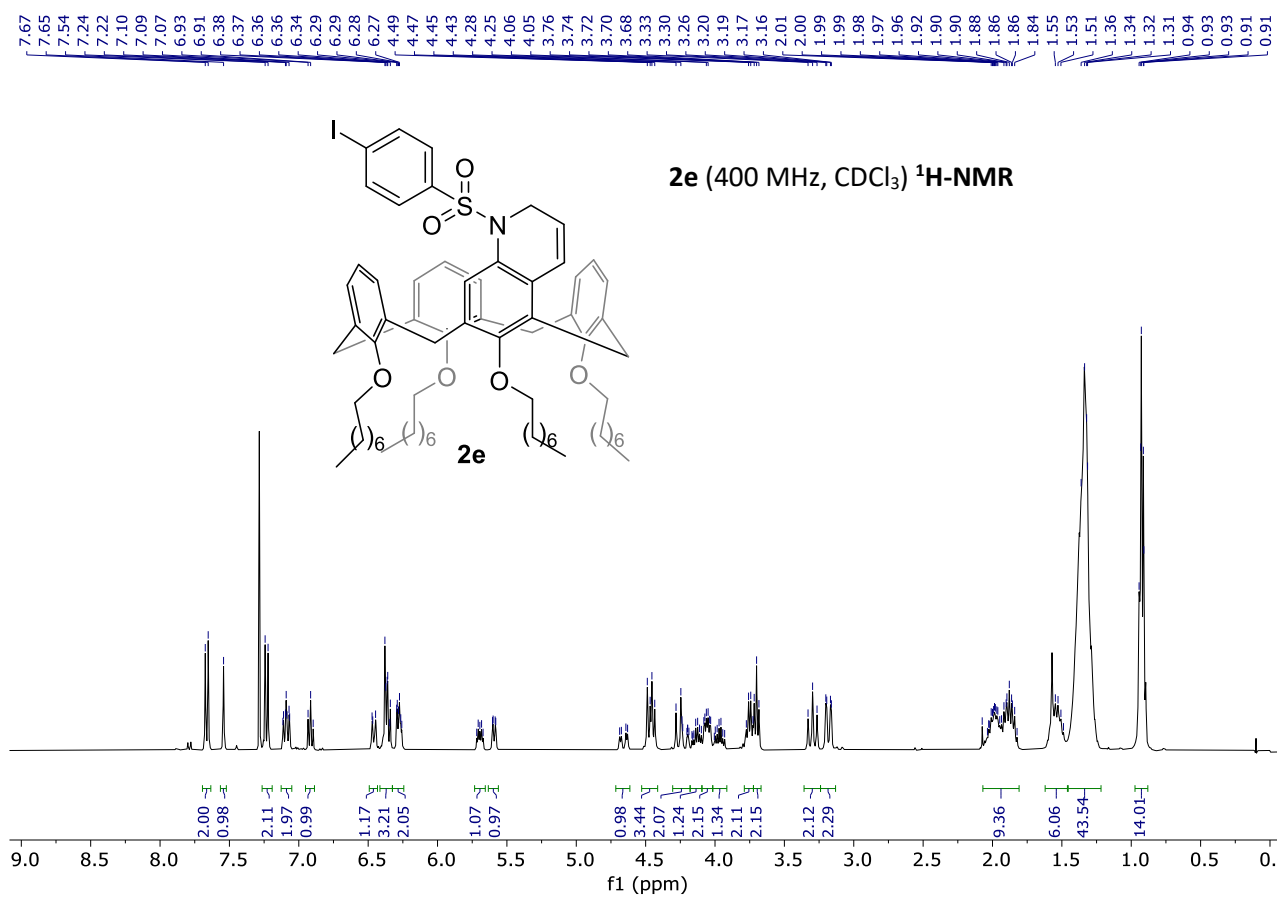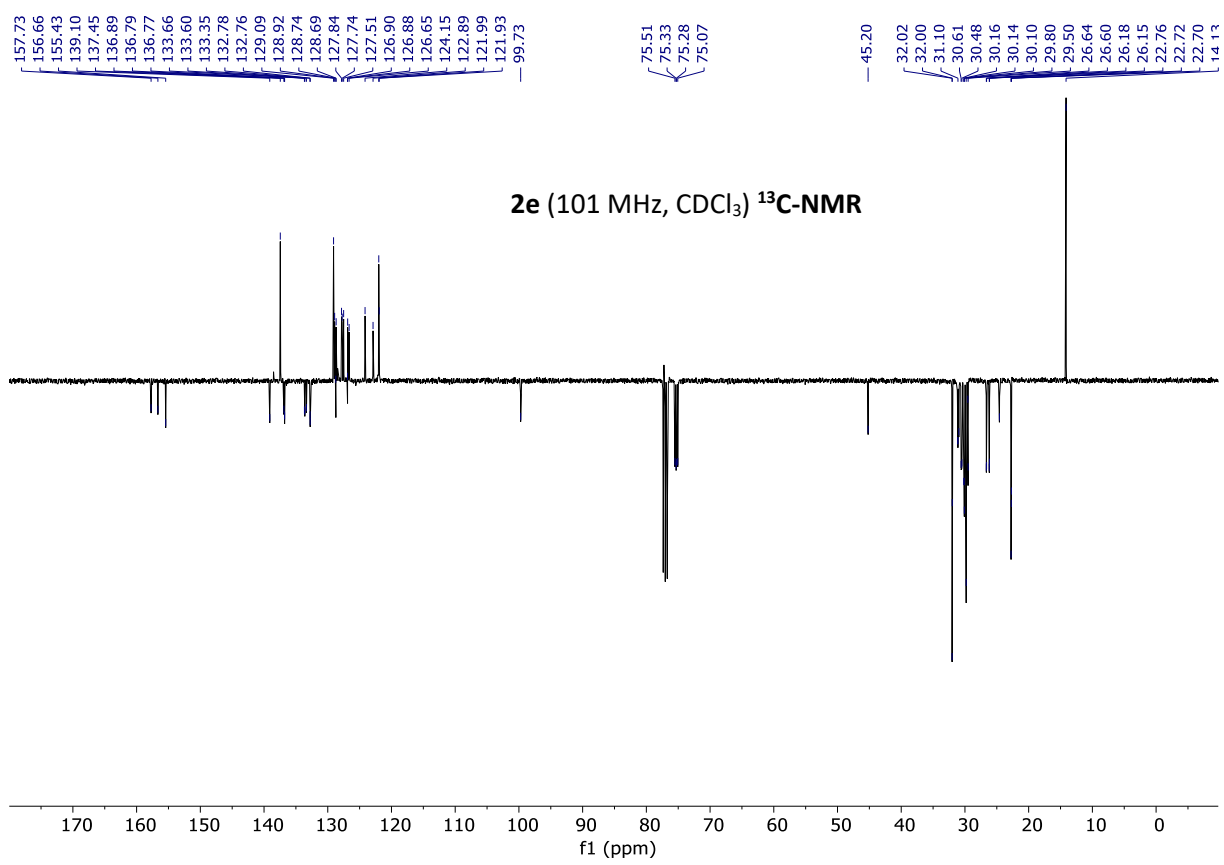

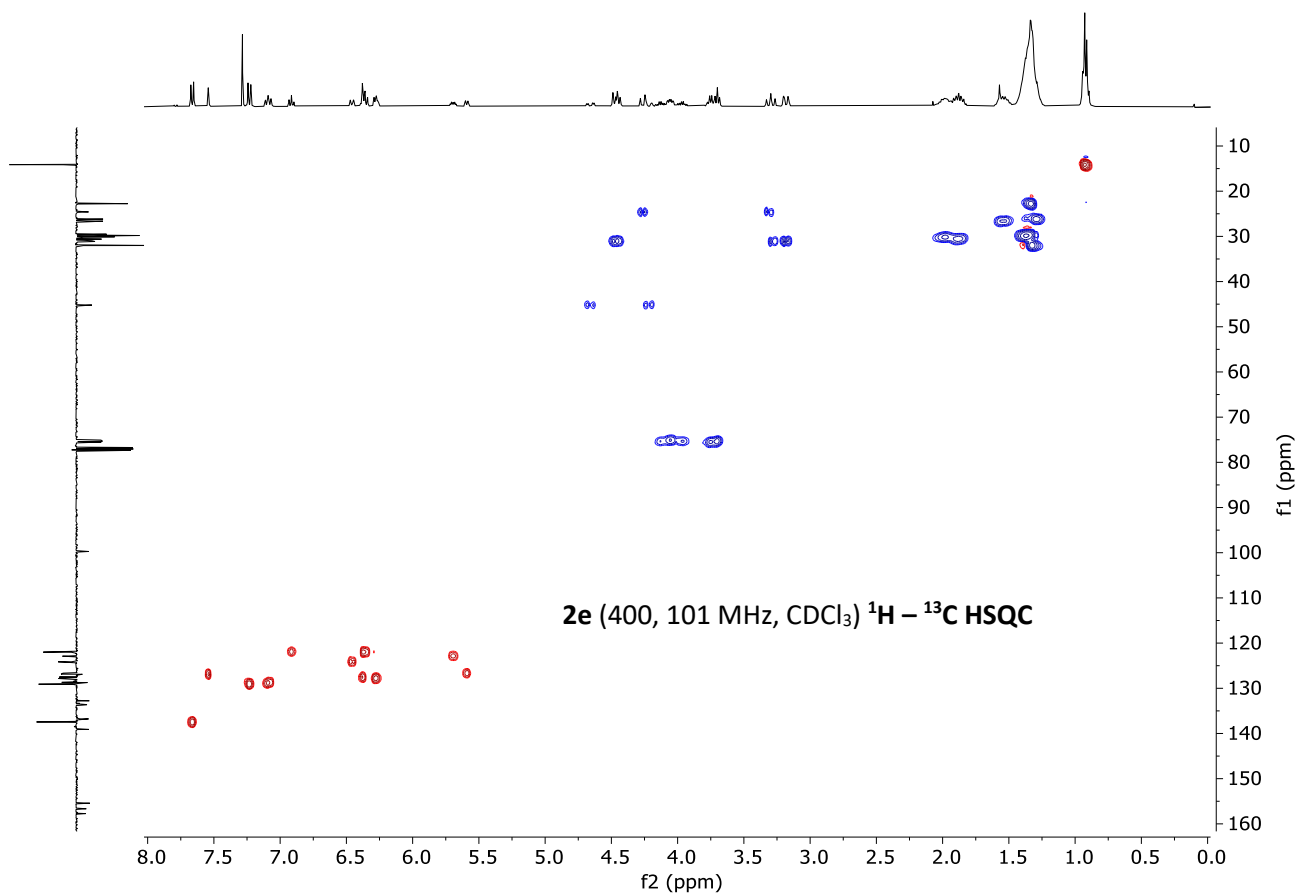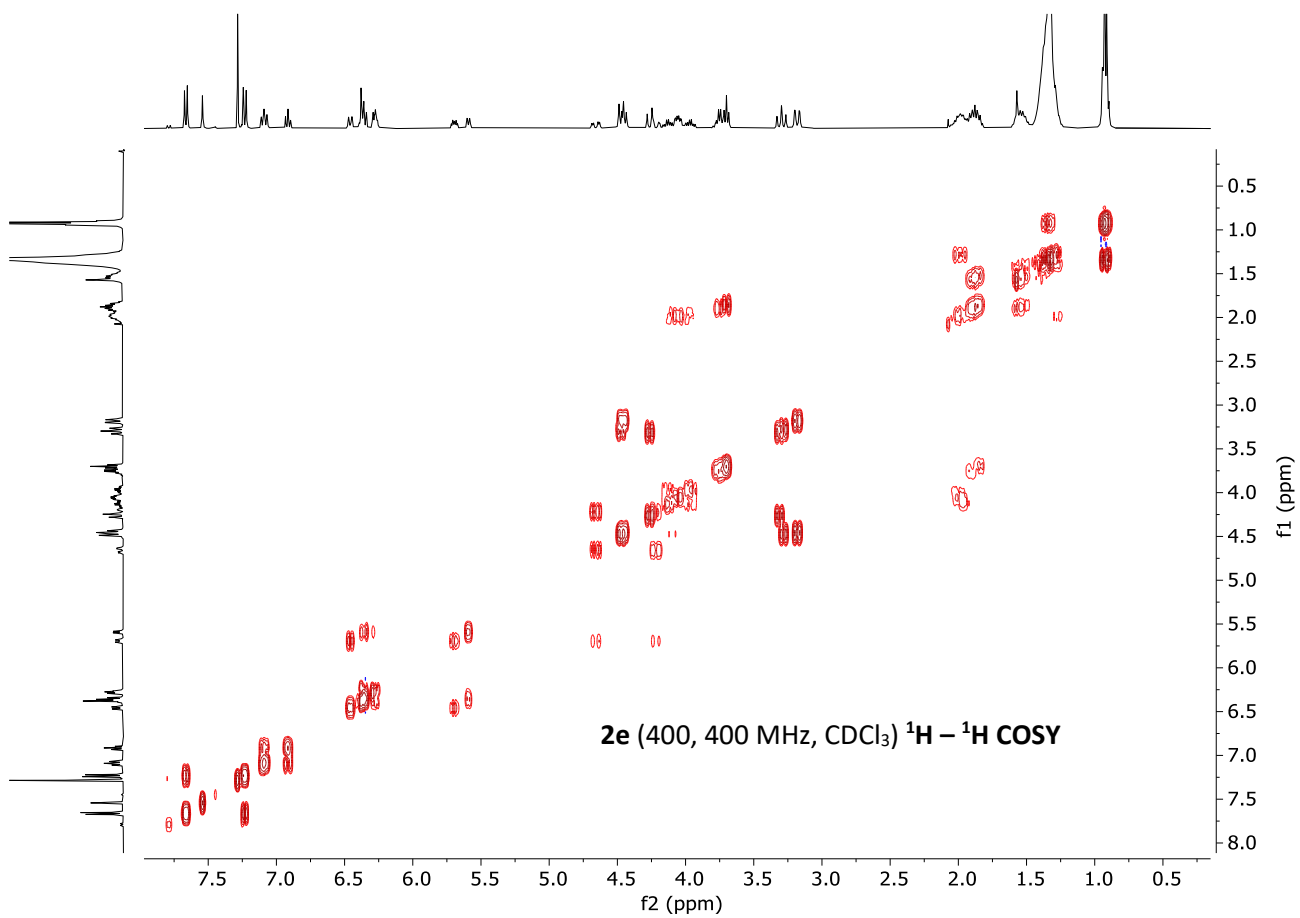

**Product 2f:**

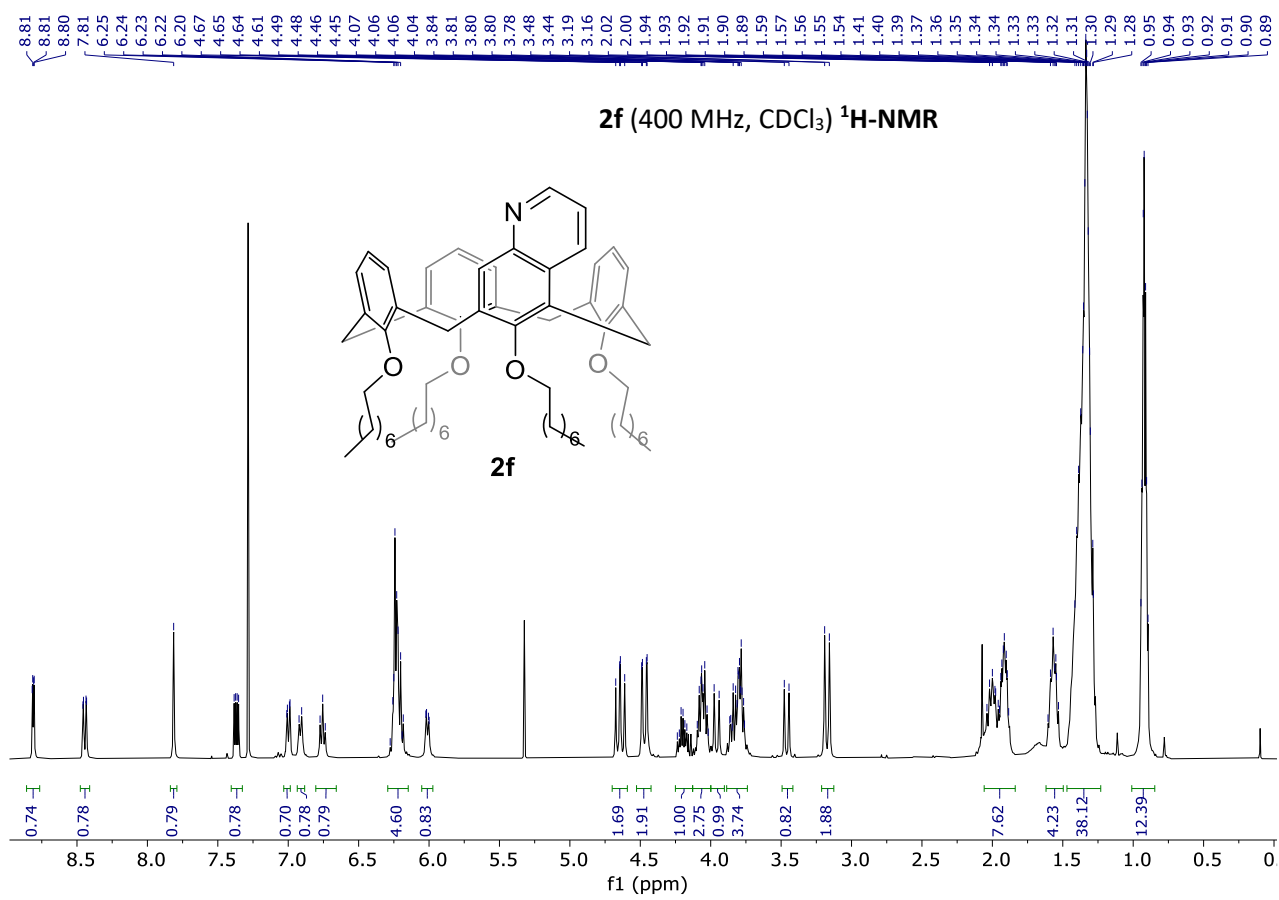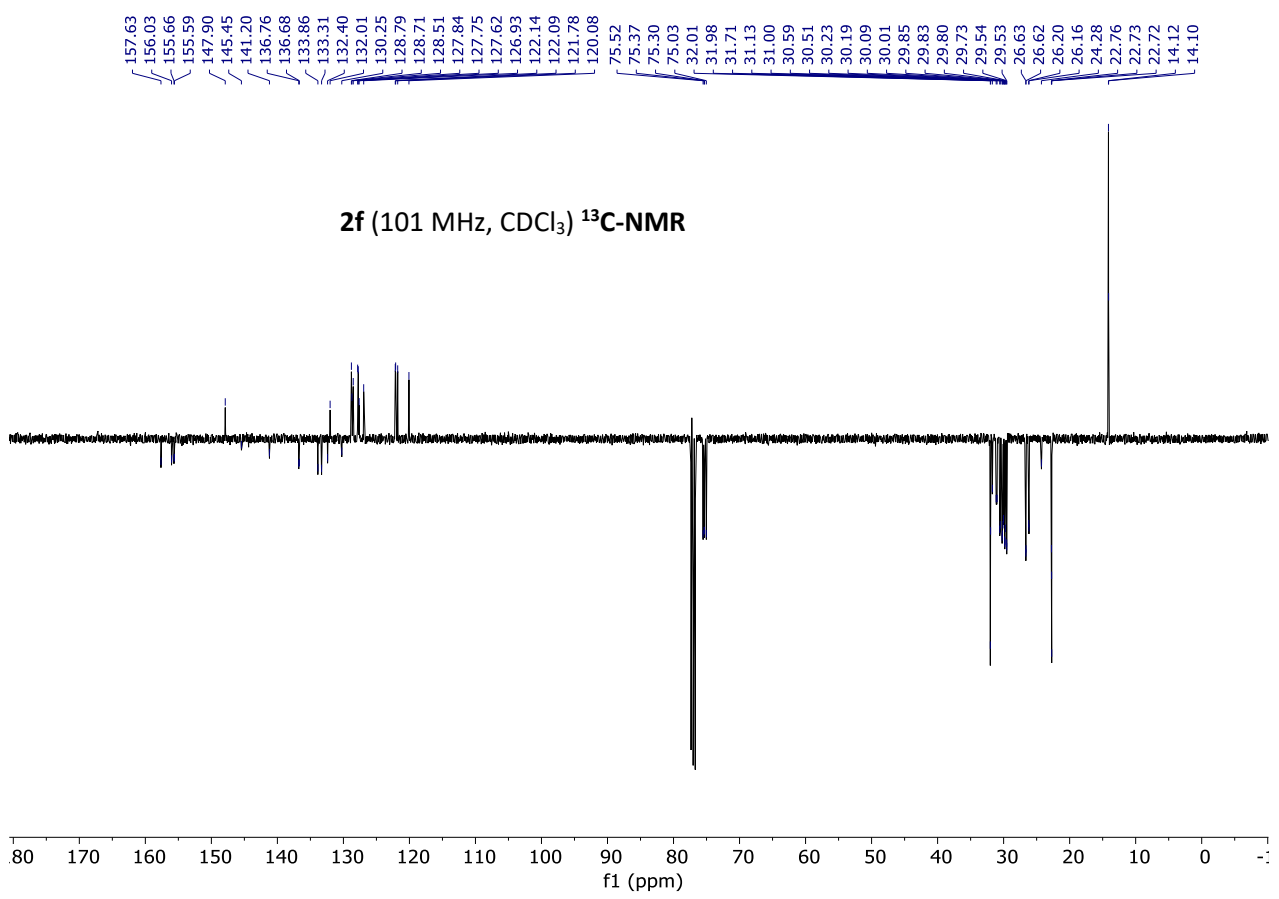

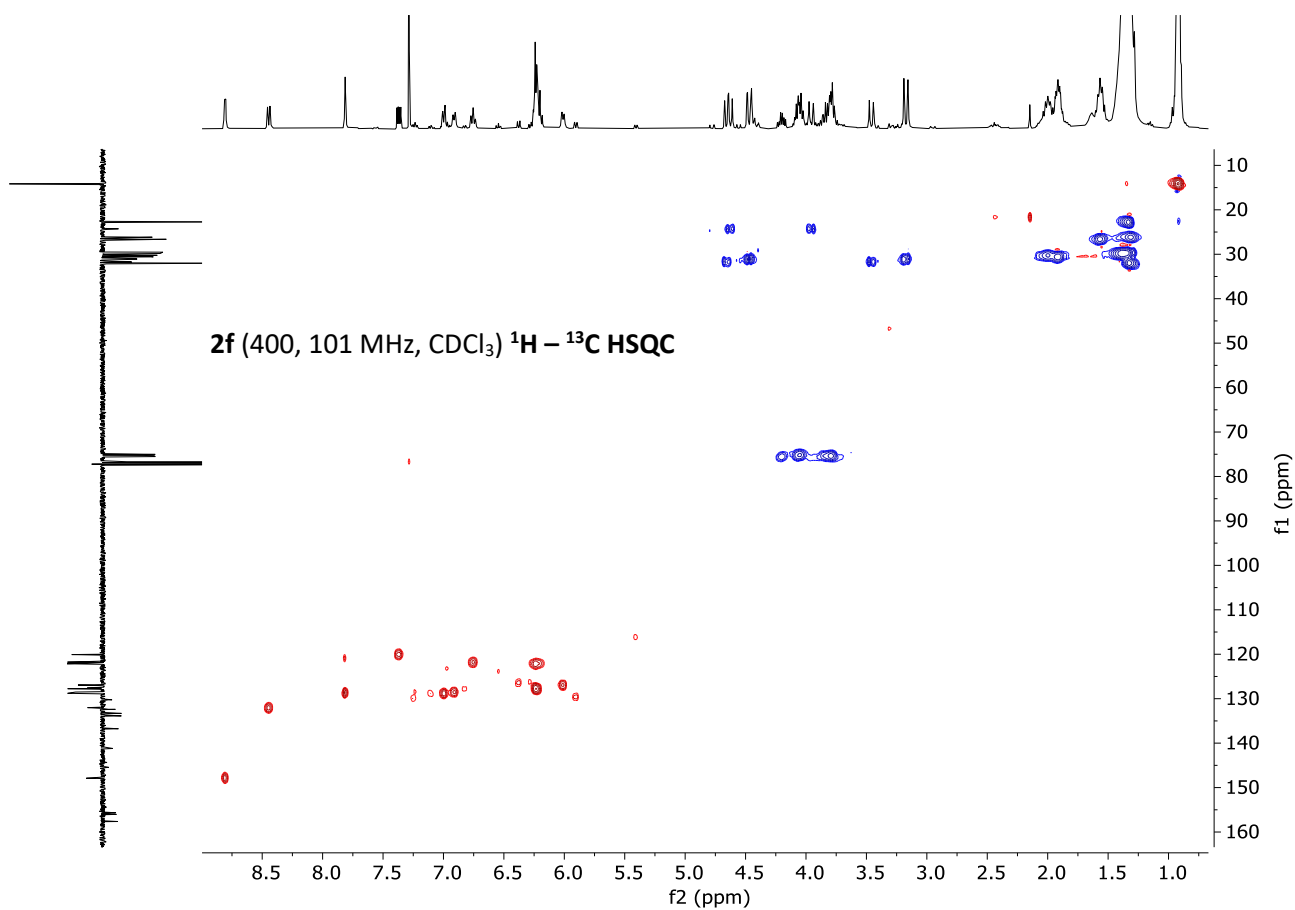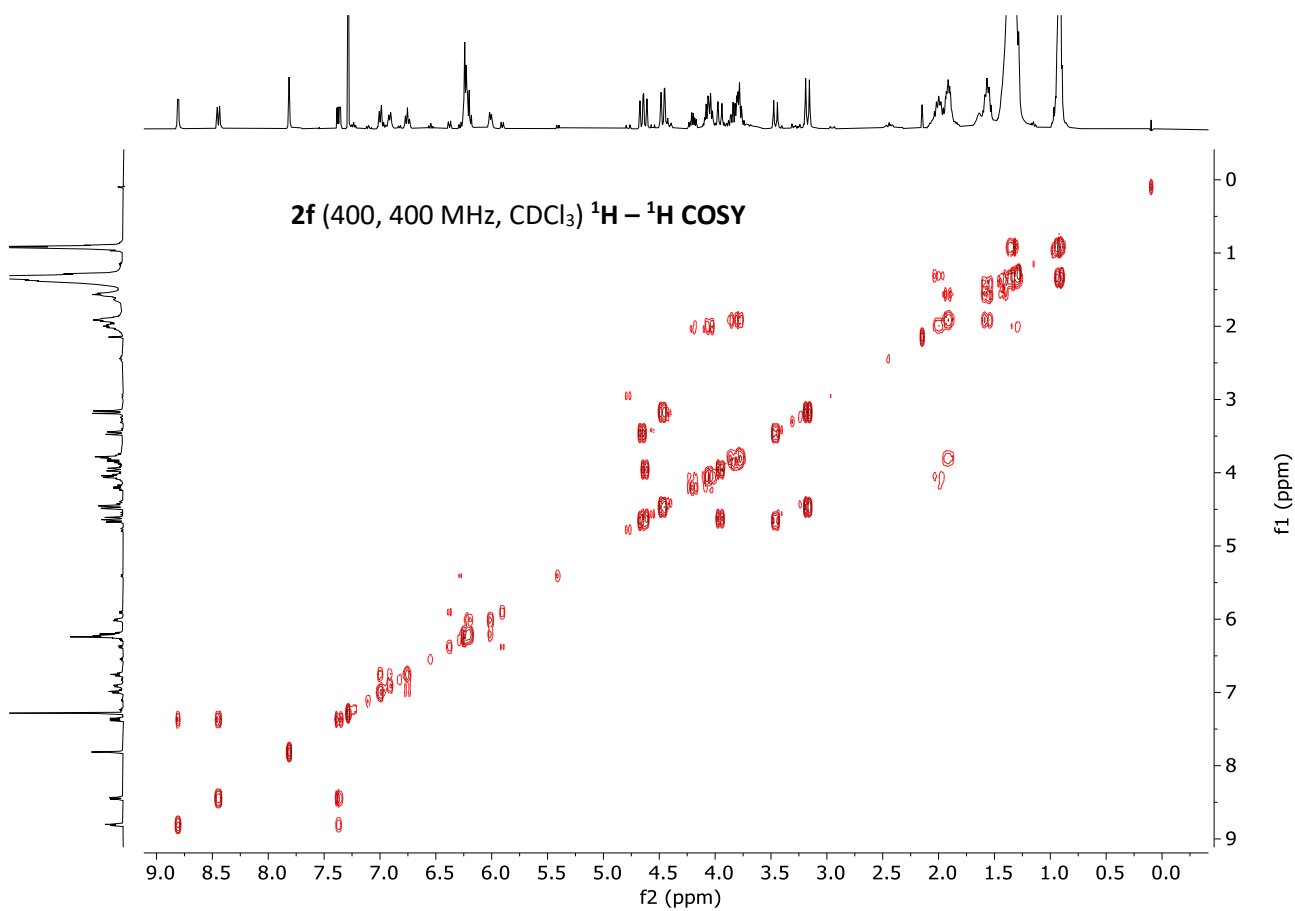

### Product 4a:

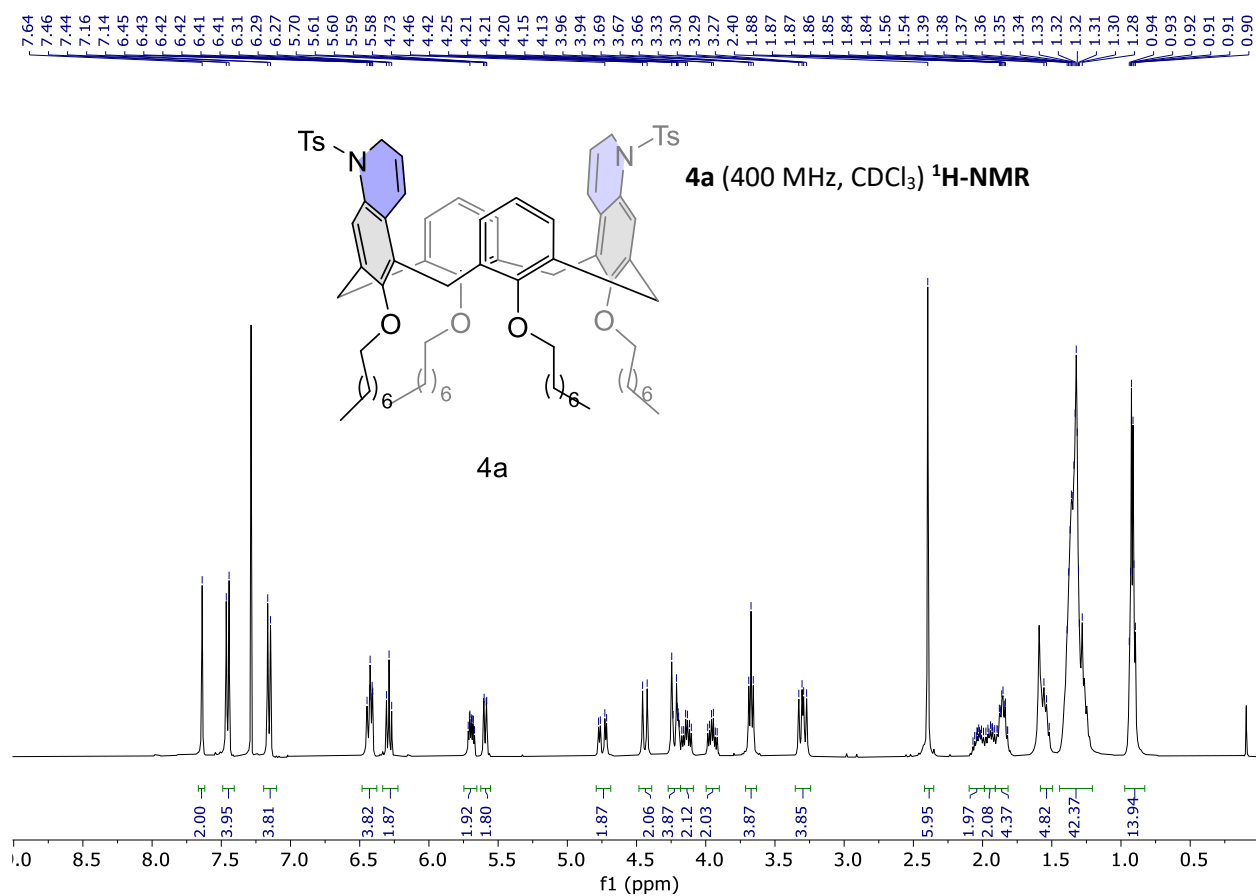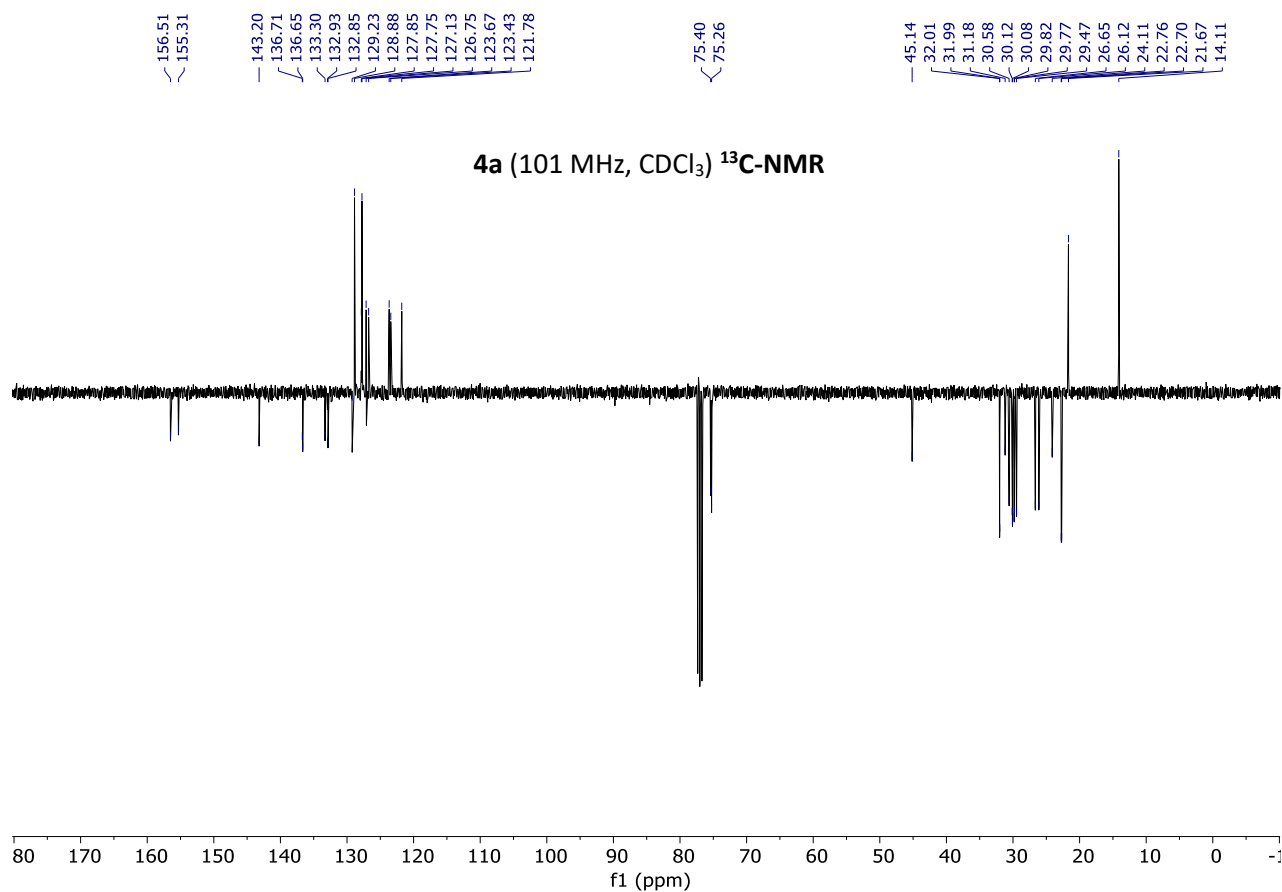

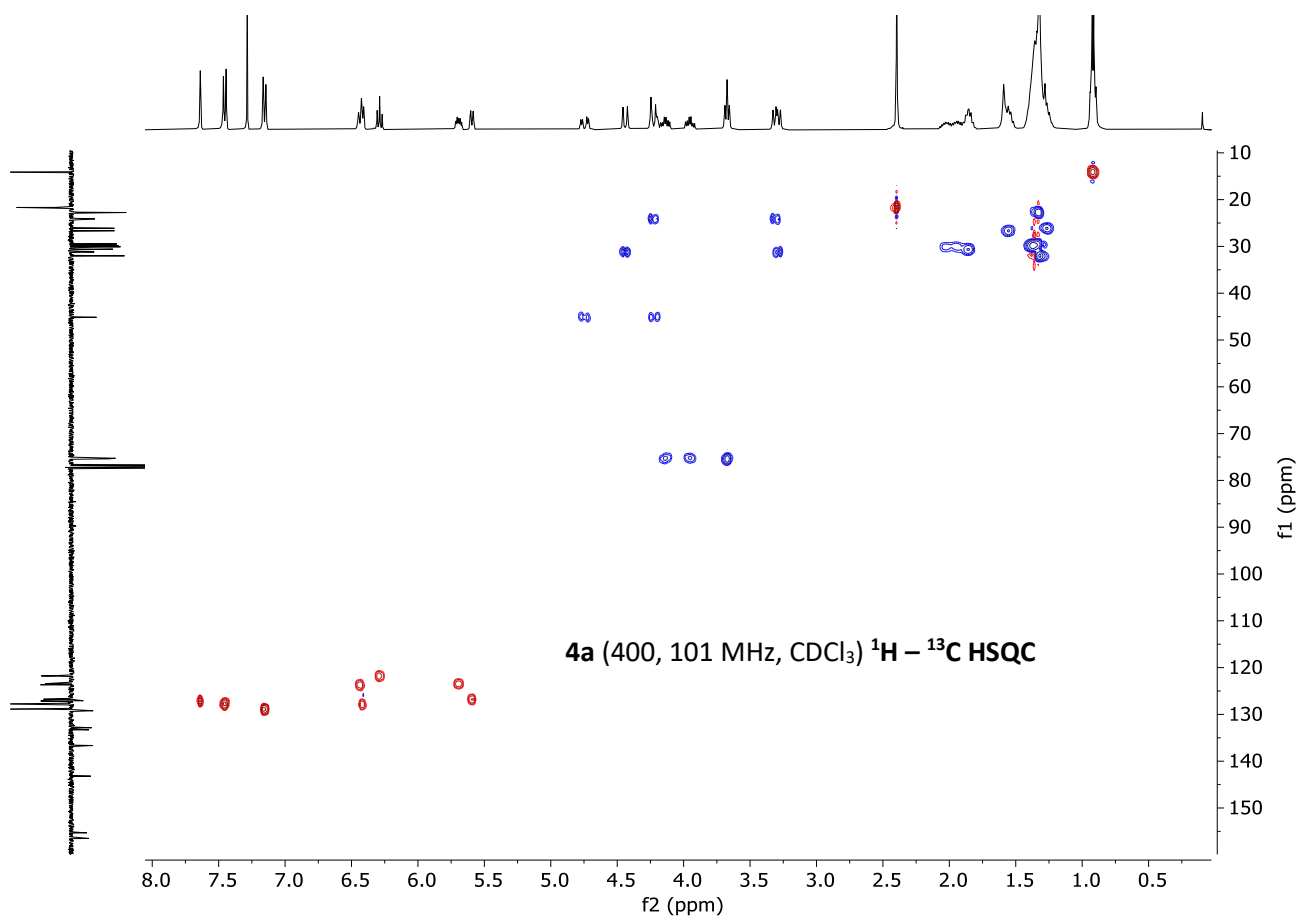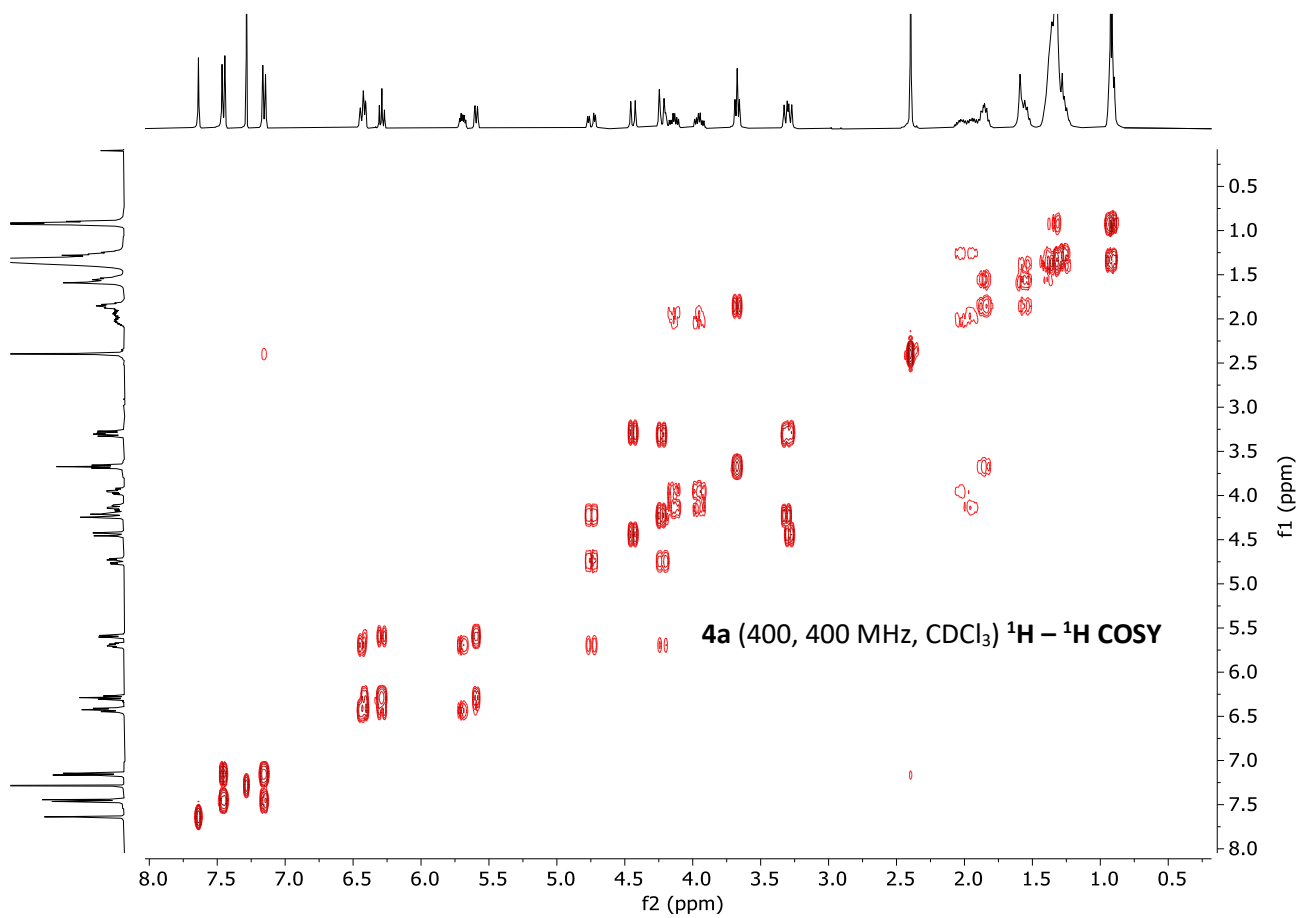

**Product 4a':**

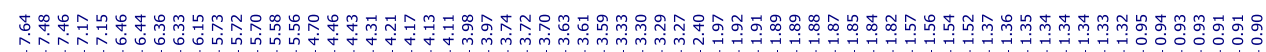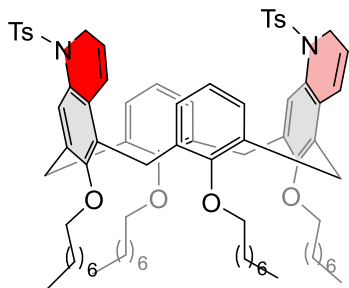

**4a' (400 MHz, CDCl<sub>3</sub>) <sup>1</sup>H-NMR**

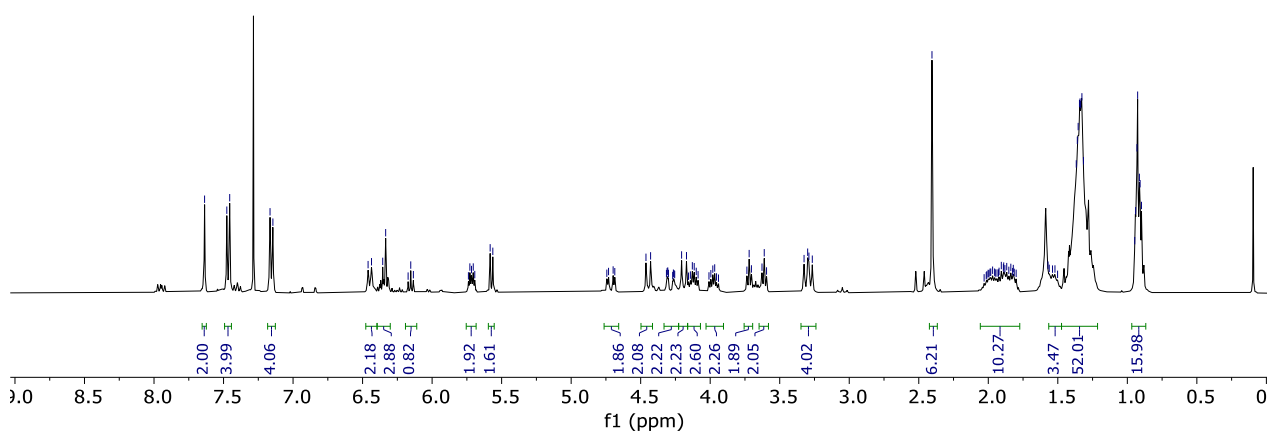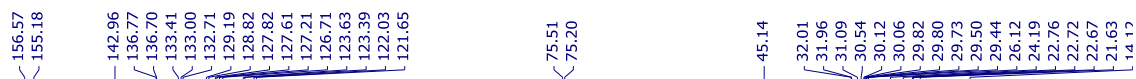

**4a' (101 MHz, CDCl<sub>3</sub>) <sup>13</sup>C-NMR**

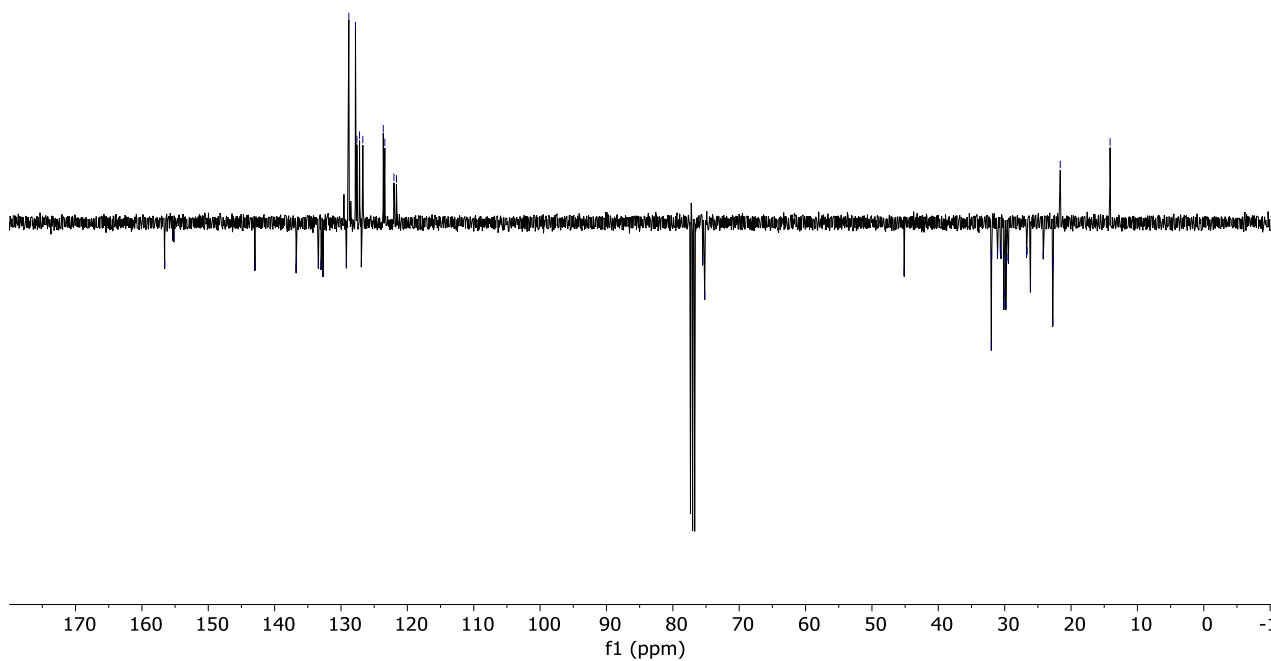

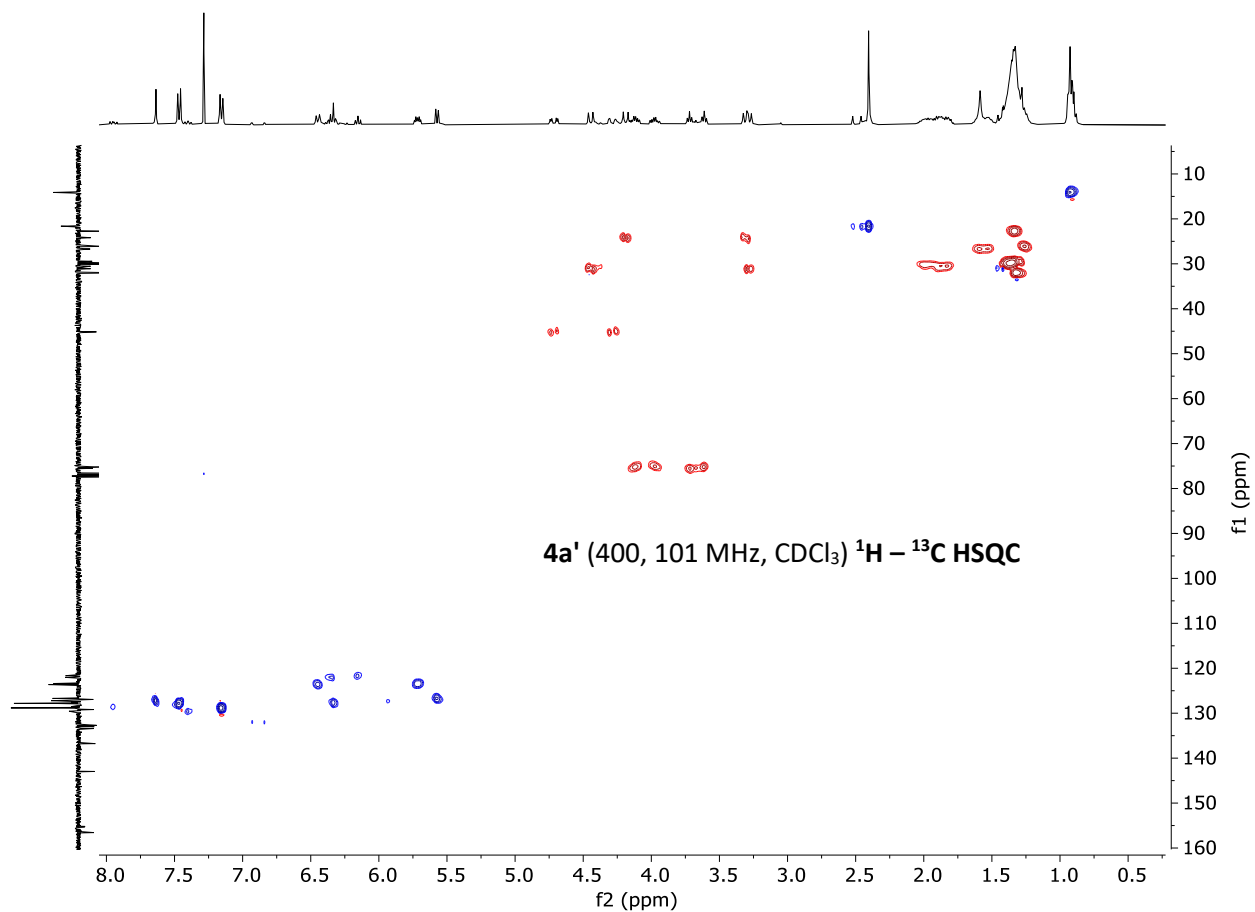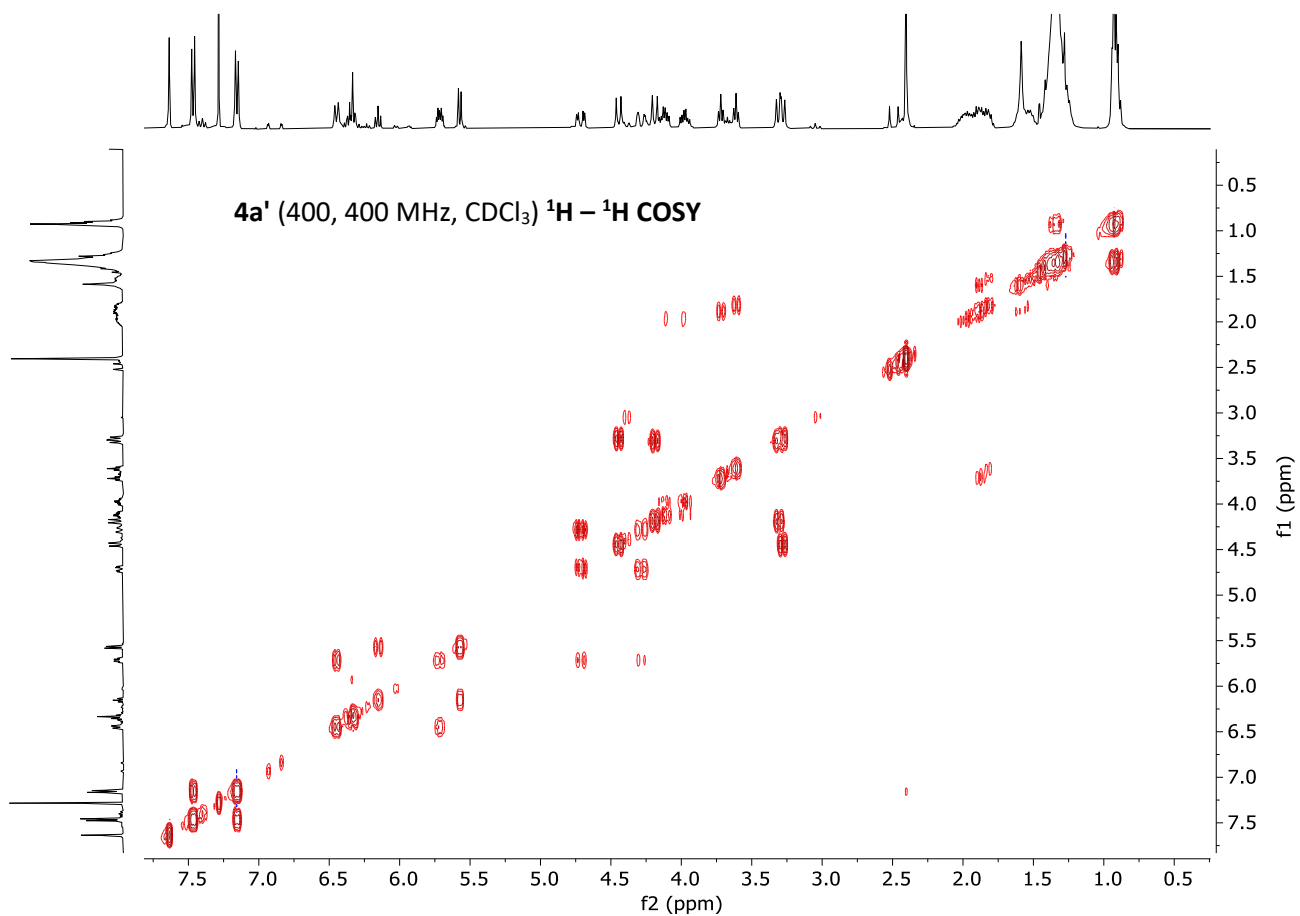



**Product 4b:**

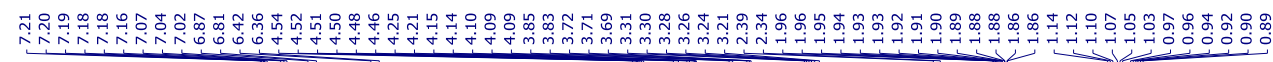

**4b (400 MHz, CDCl<sub>3</sub>) <sup>1</sup>H-NMR**

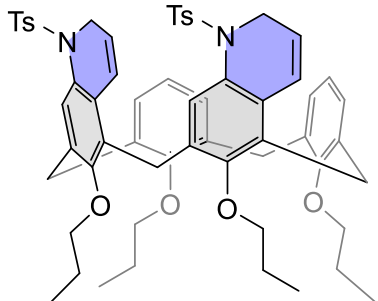

**4b**

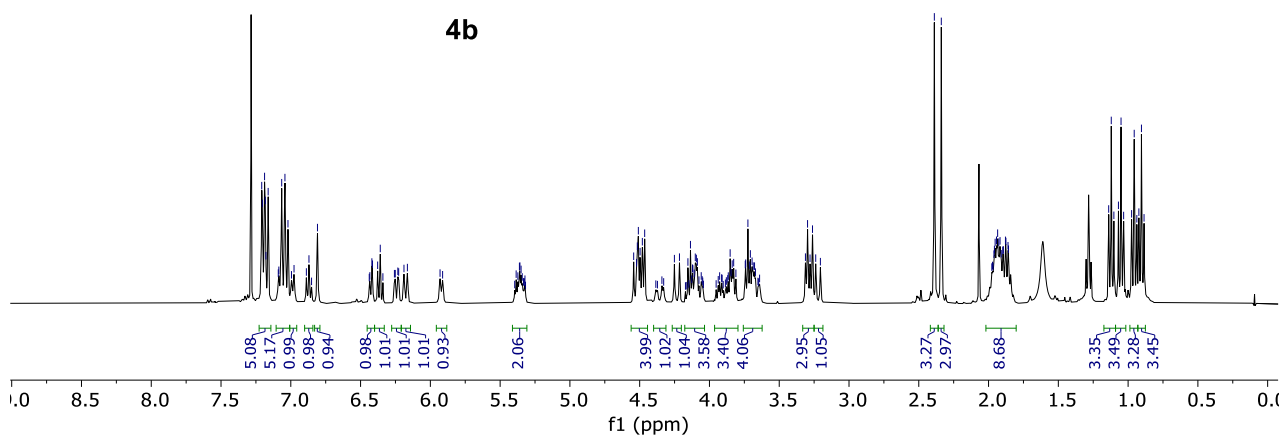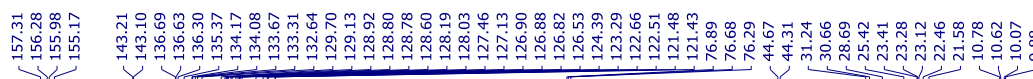

**4b (101 MHz, CDCl<sub>3</sub>) <sup>13</sup>C-NMR**

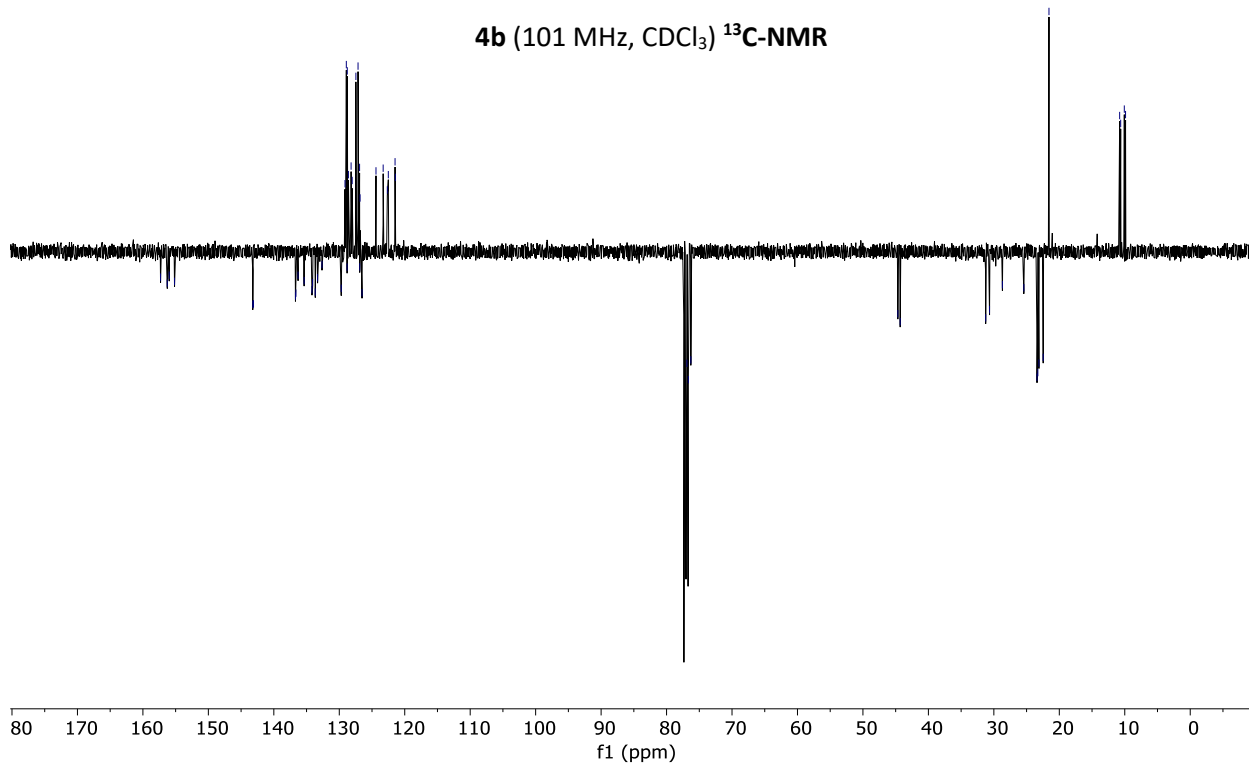

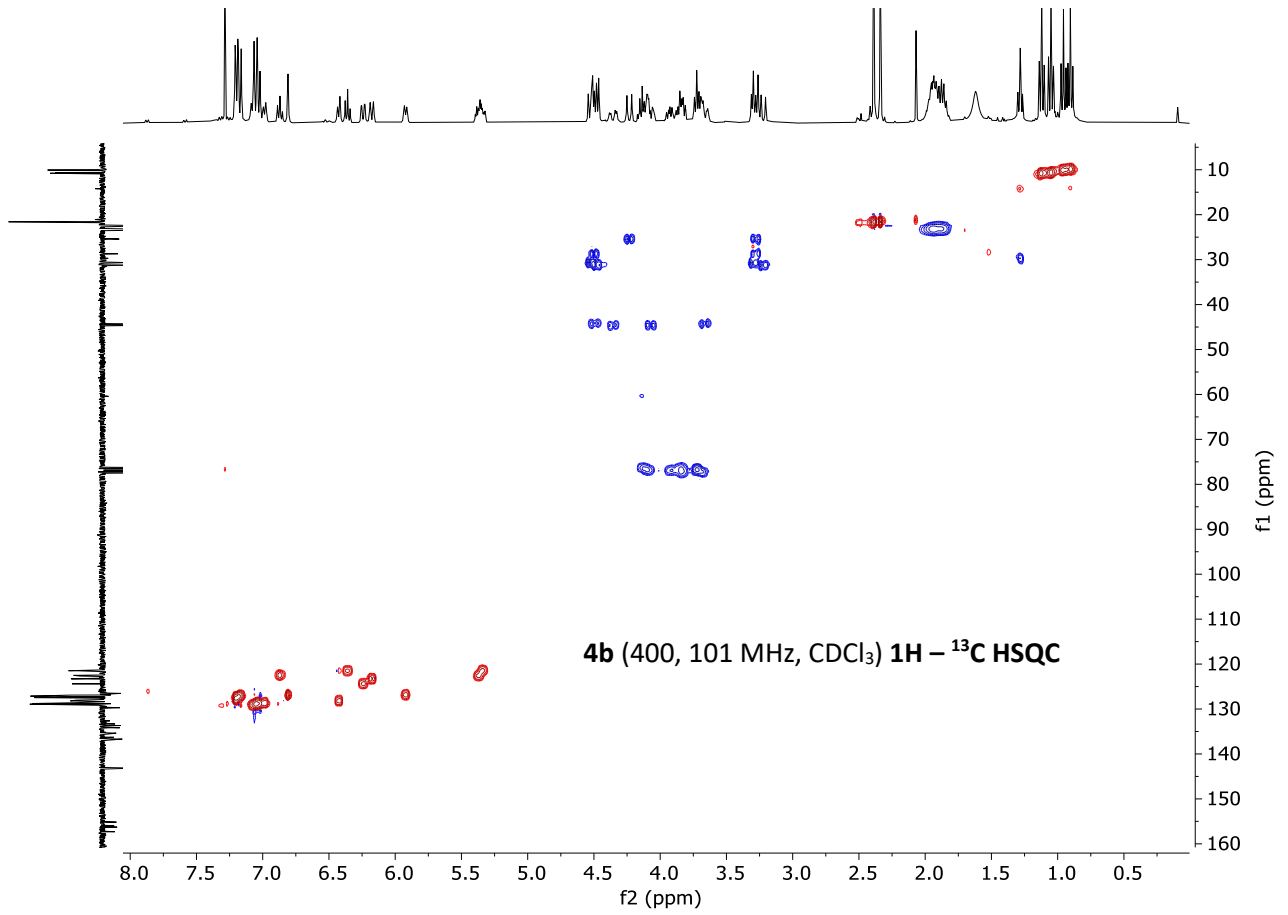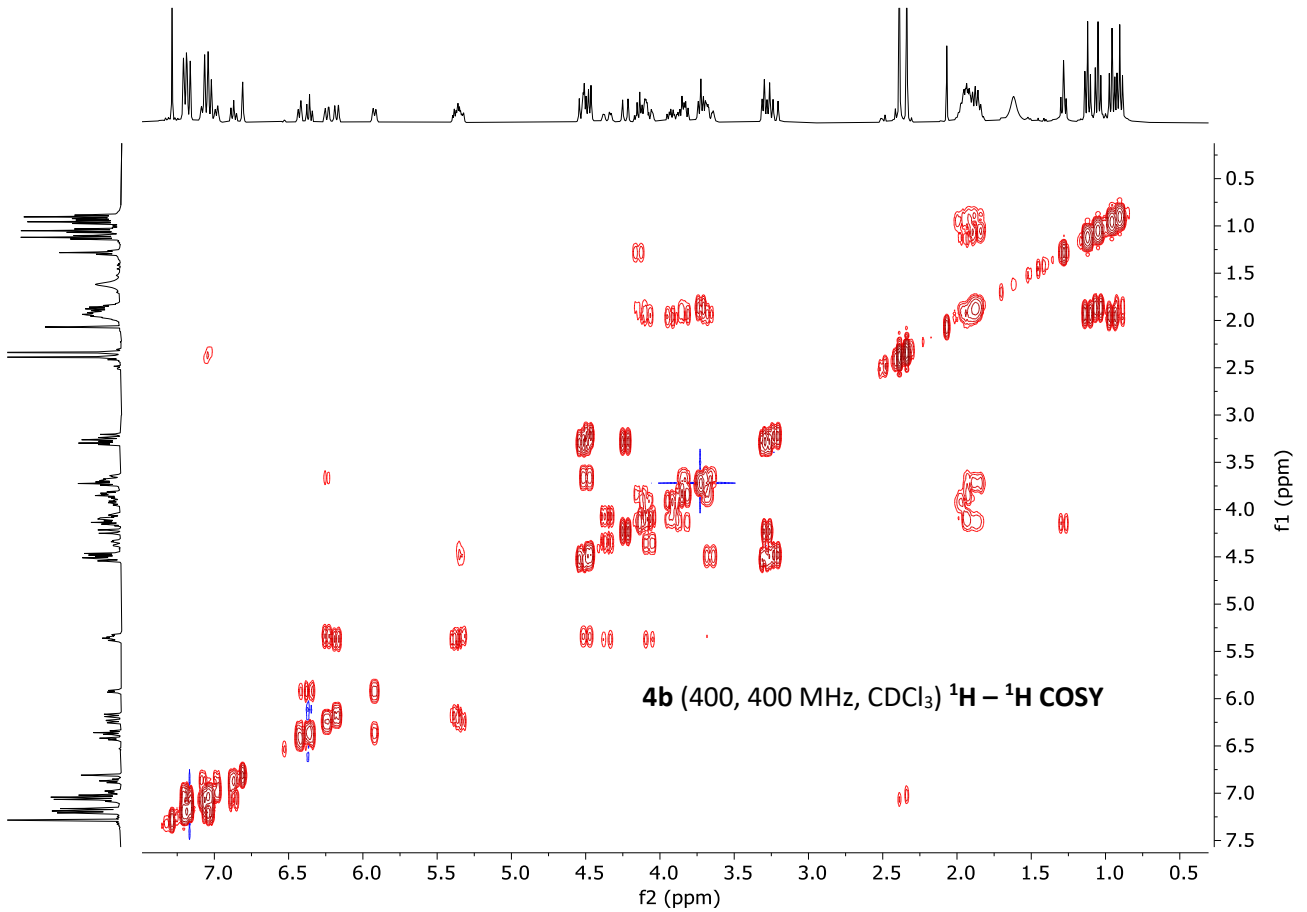

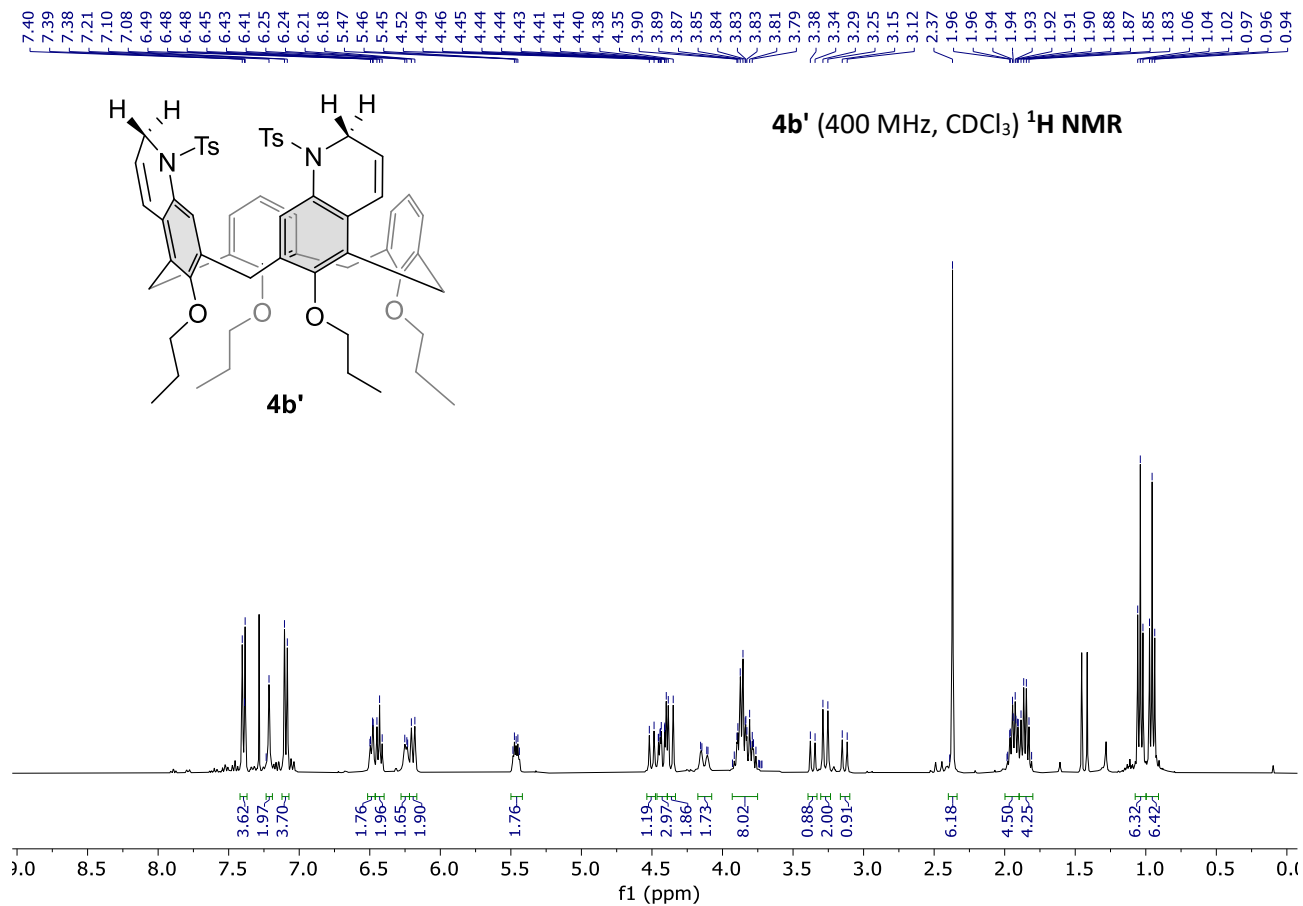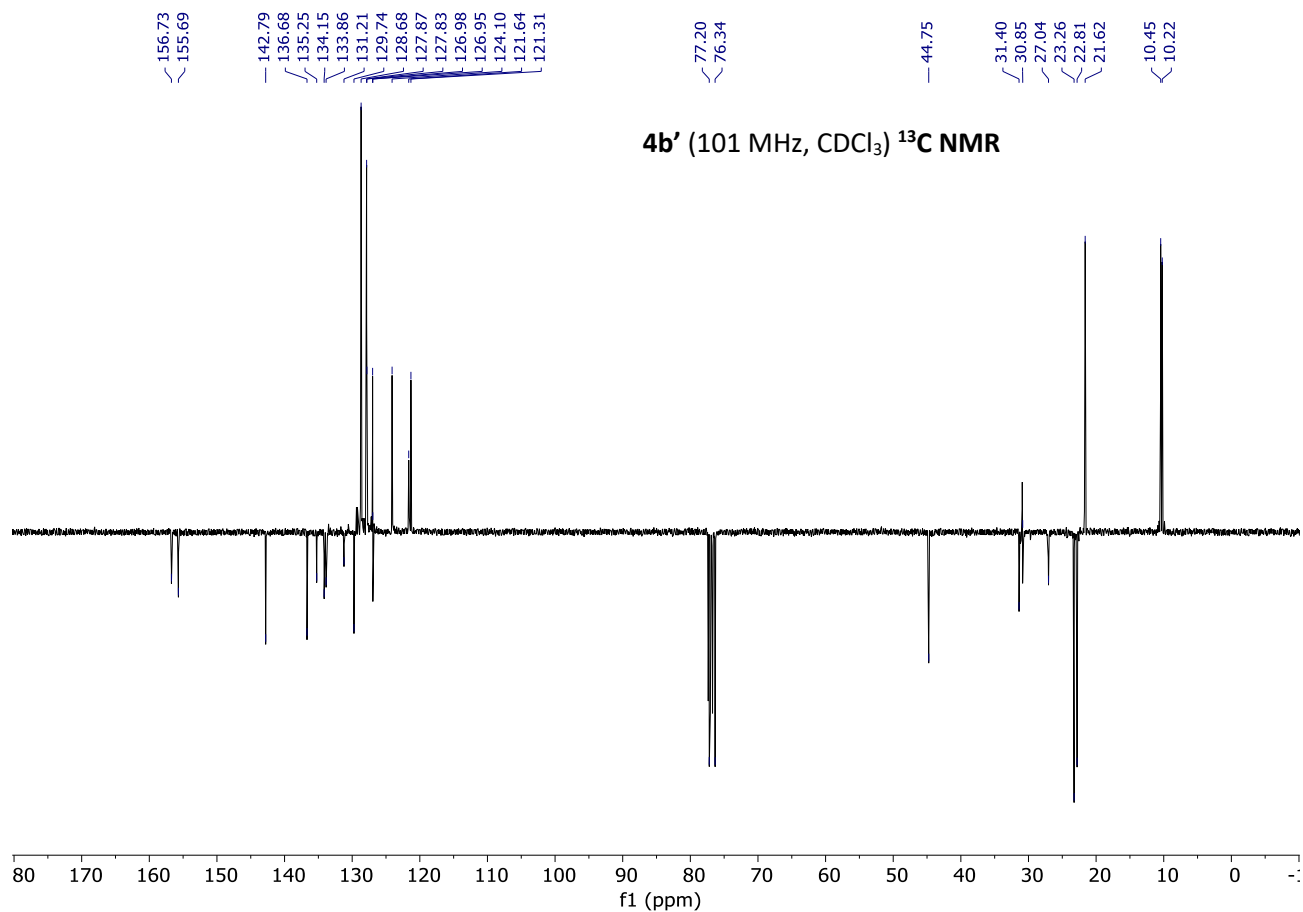

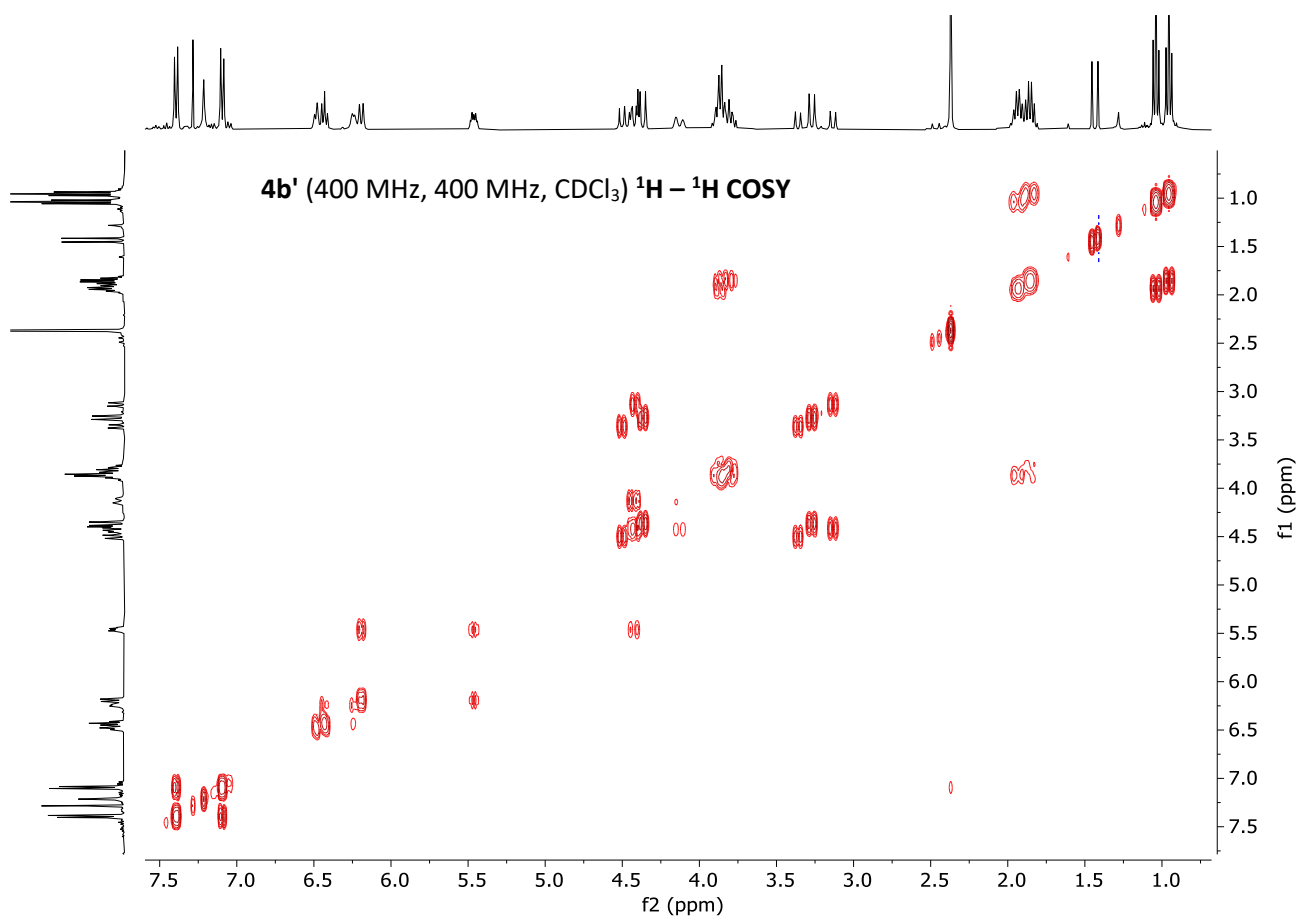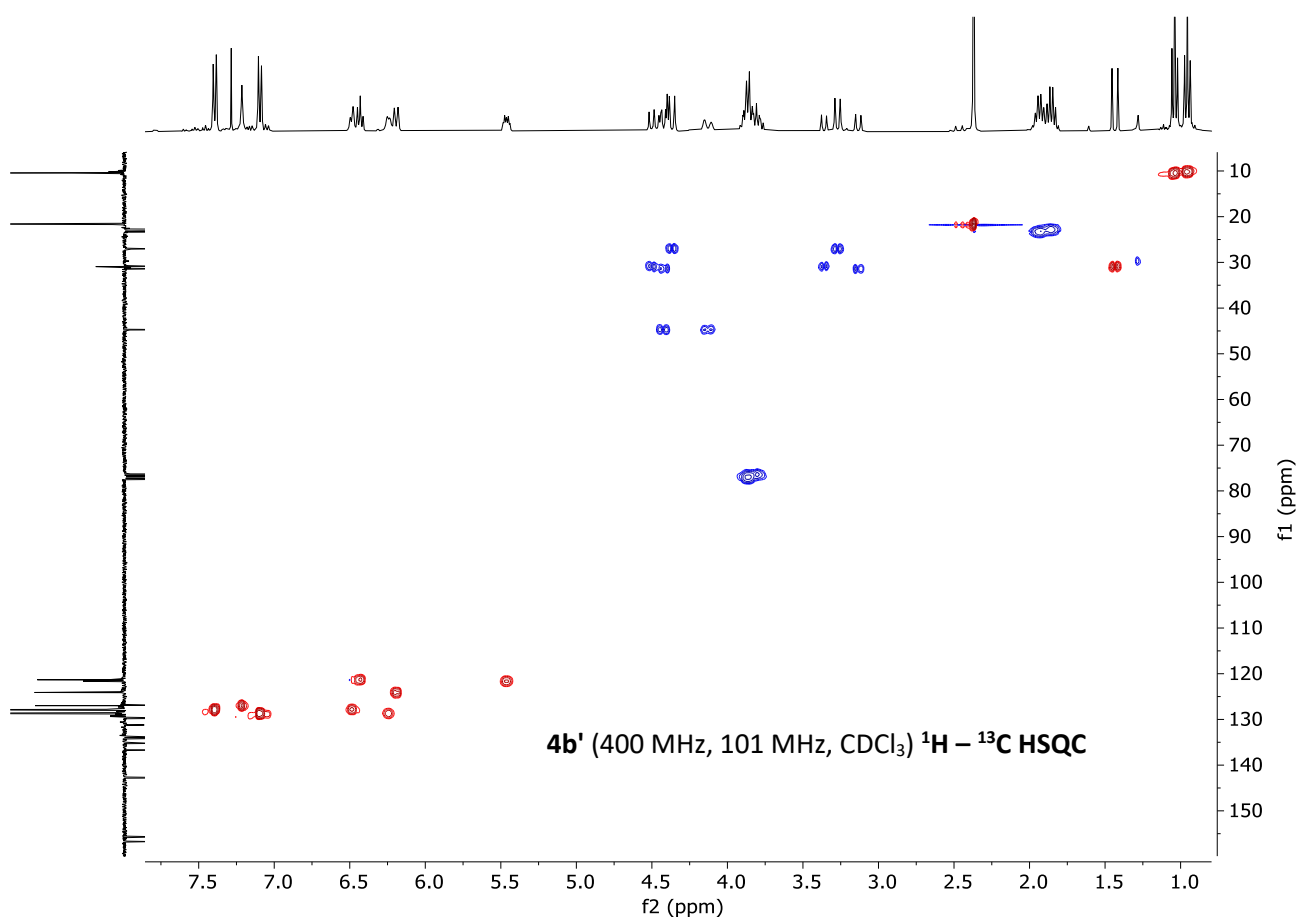

**Product 6a:**

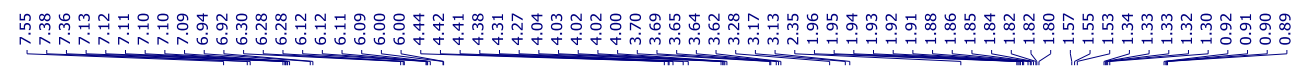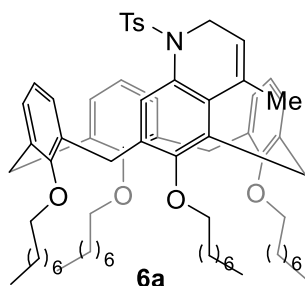

**6a (400 MHz, CDCl<sub>3</sub>) <sup>1</sup>H-NMR**

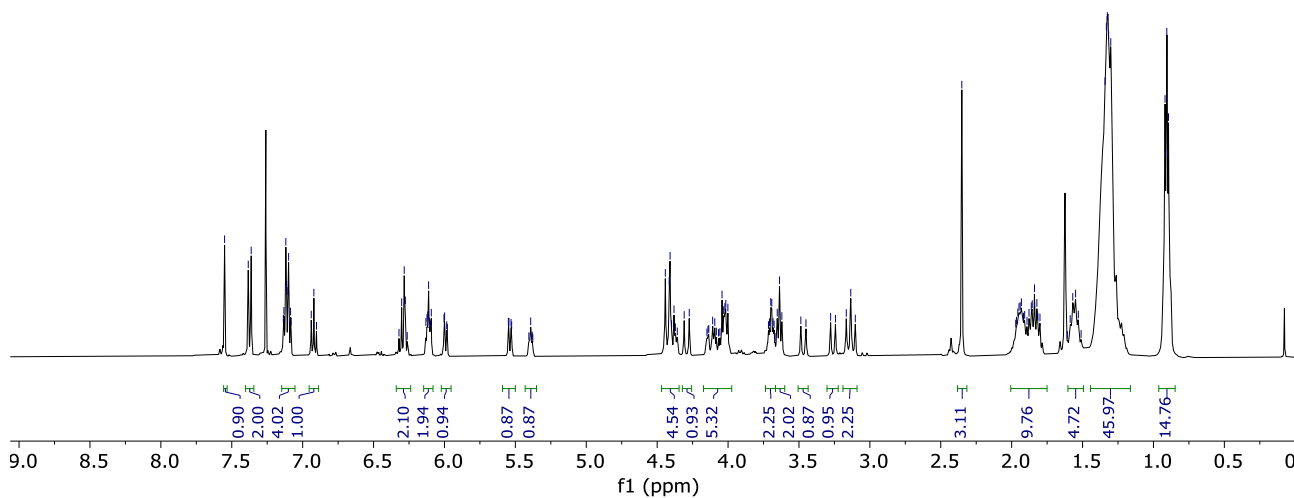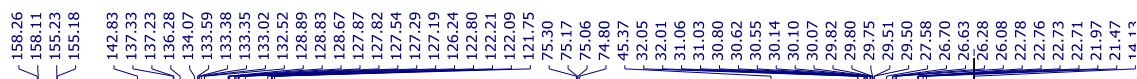

**6a (101 MHz, CDCl<sub>3</sub>) <sup>13</sup>C-NMR**

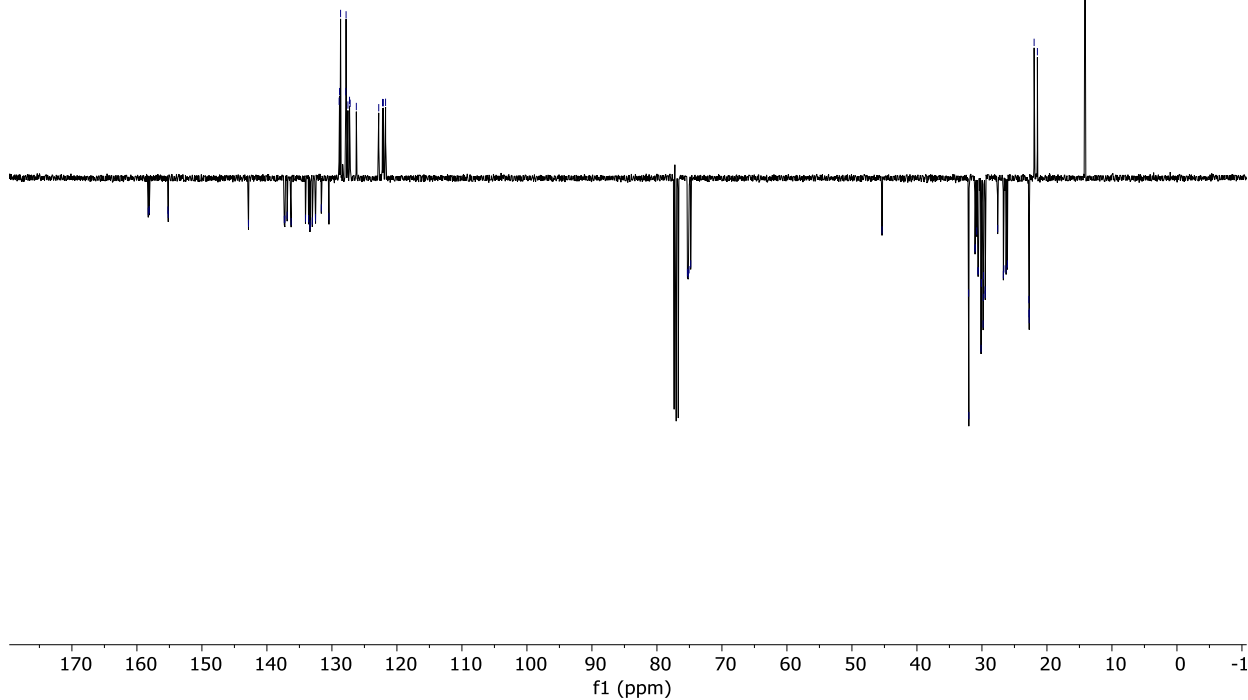

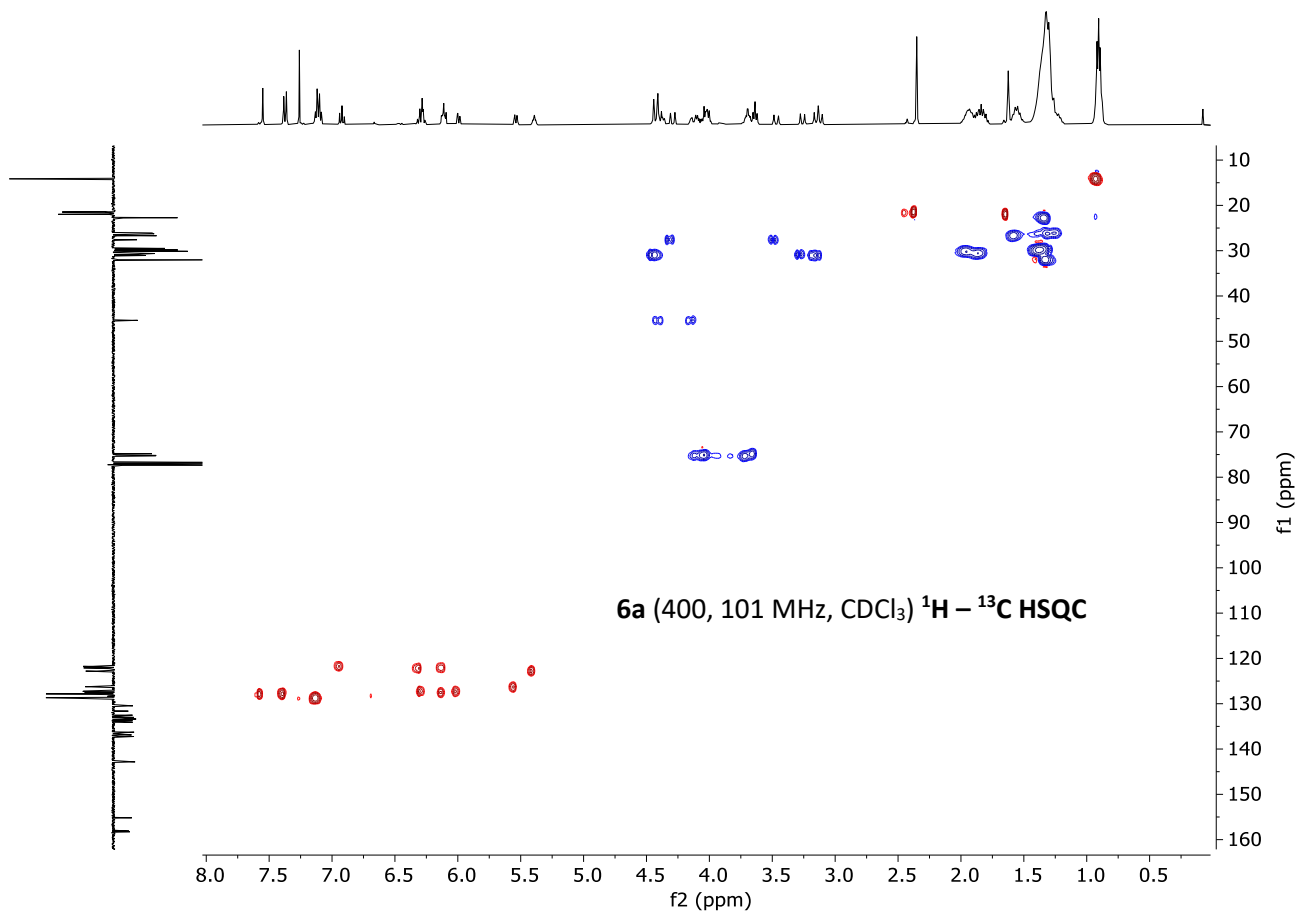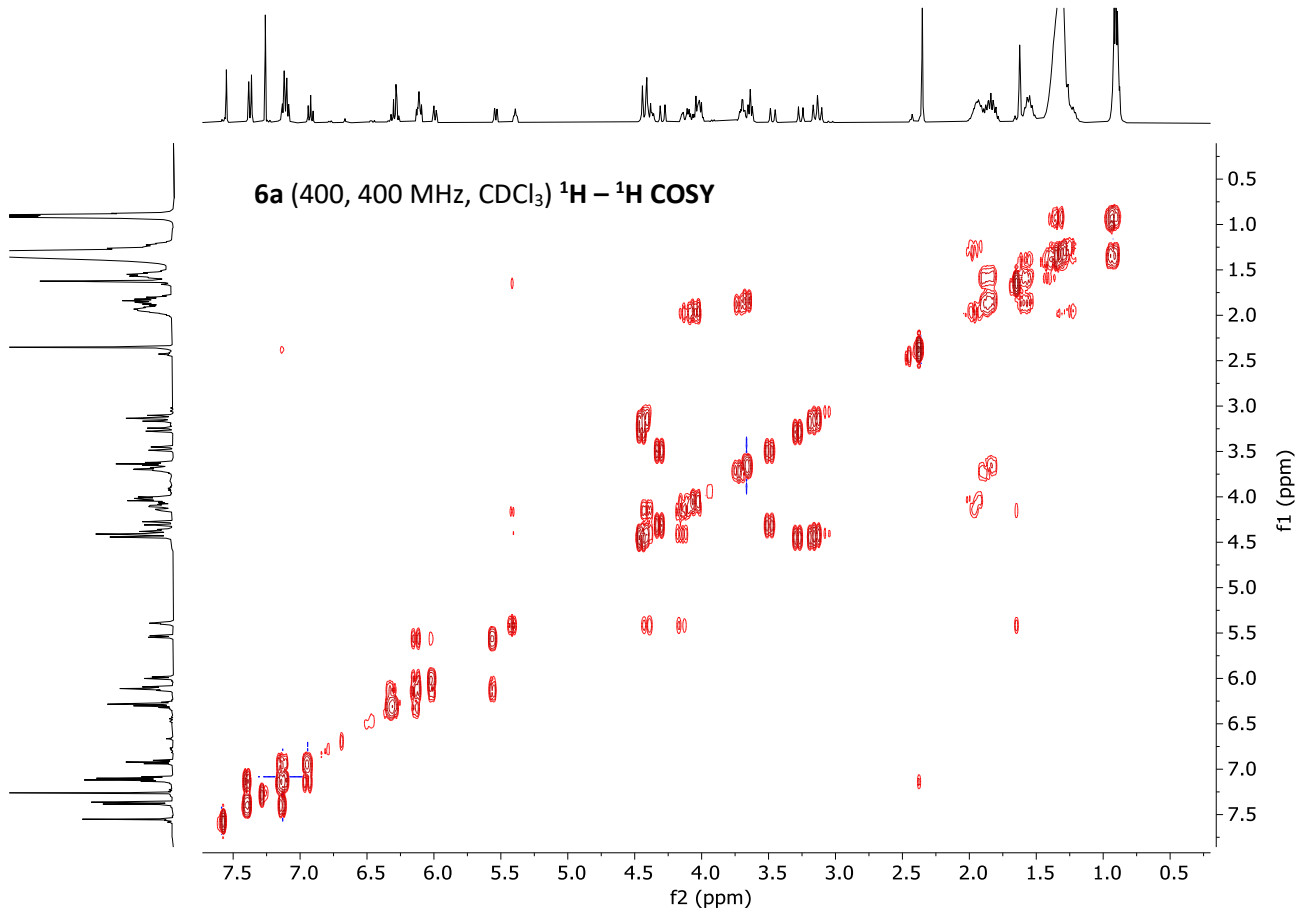

**Product 6b:**

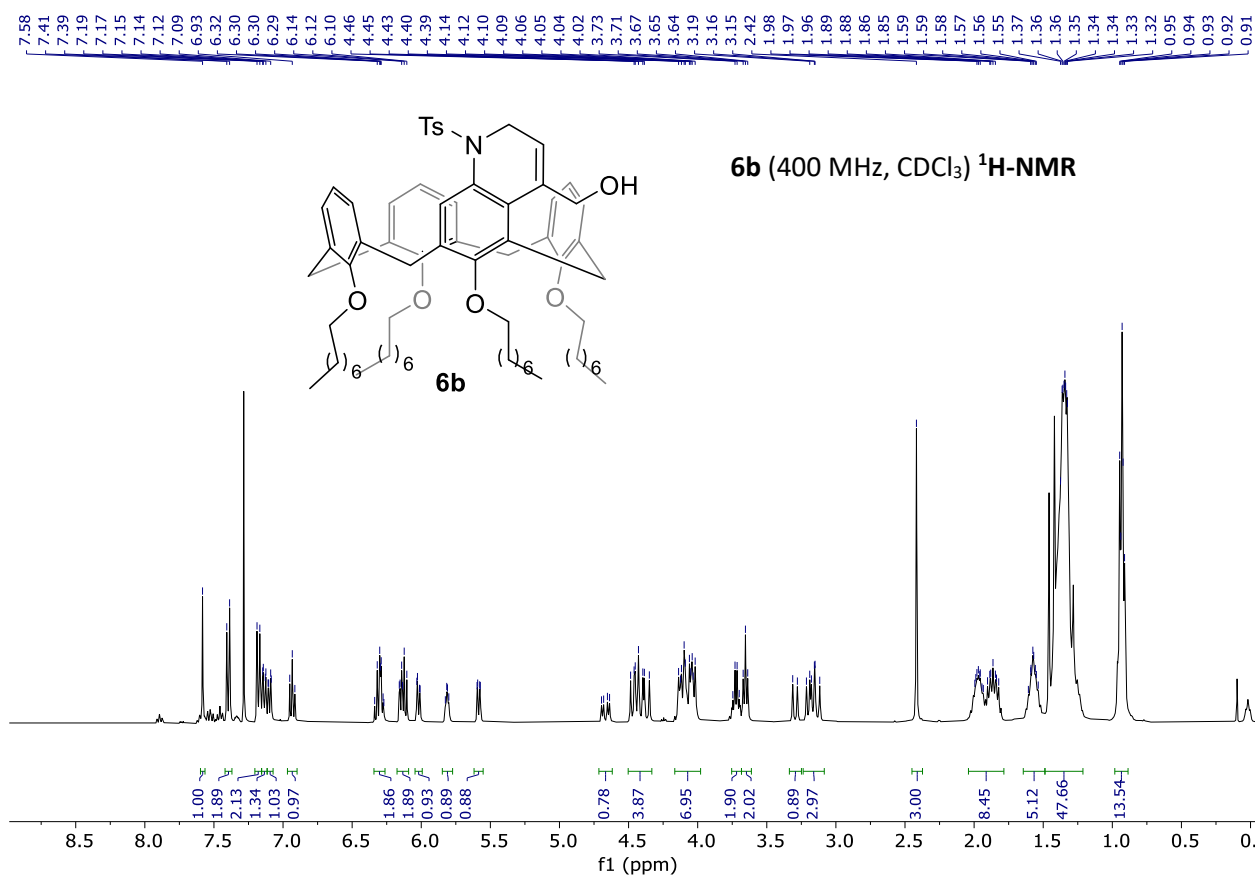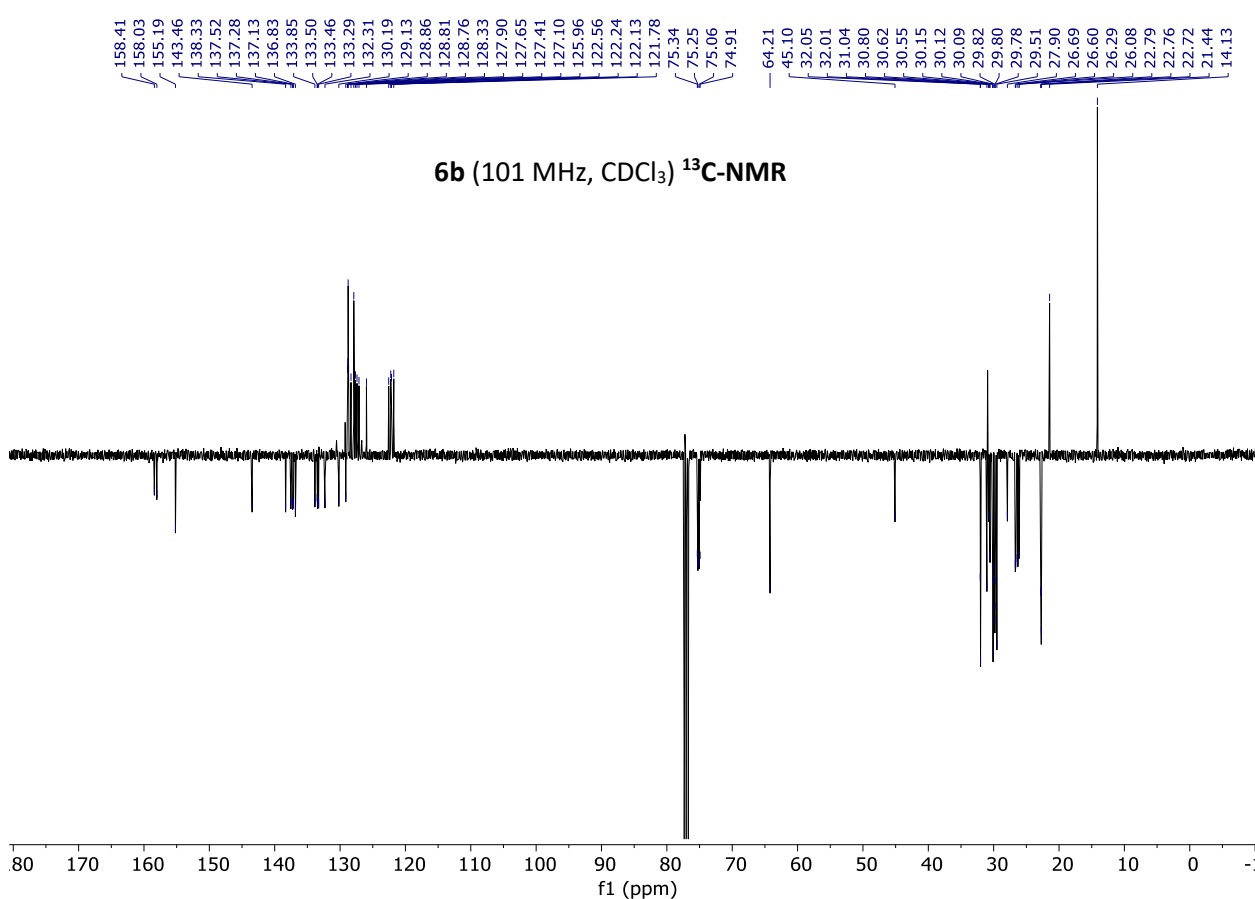

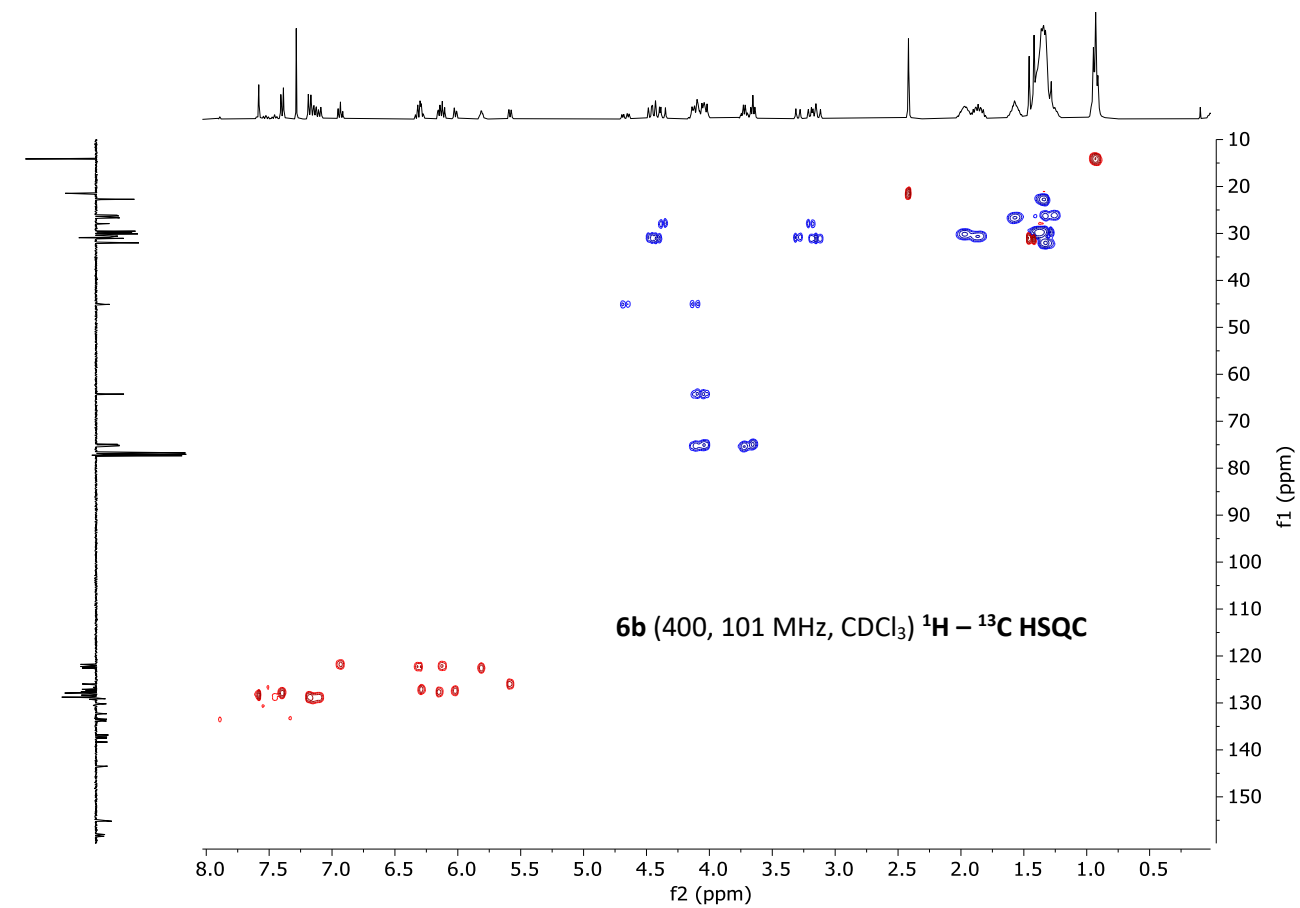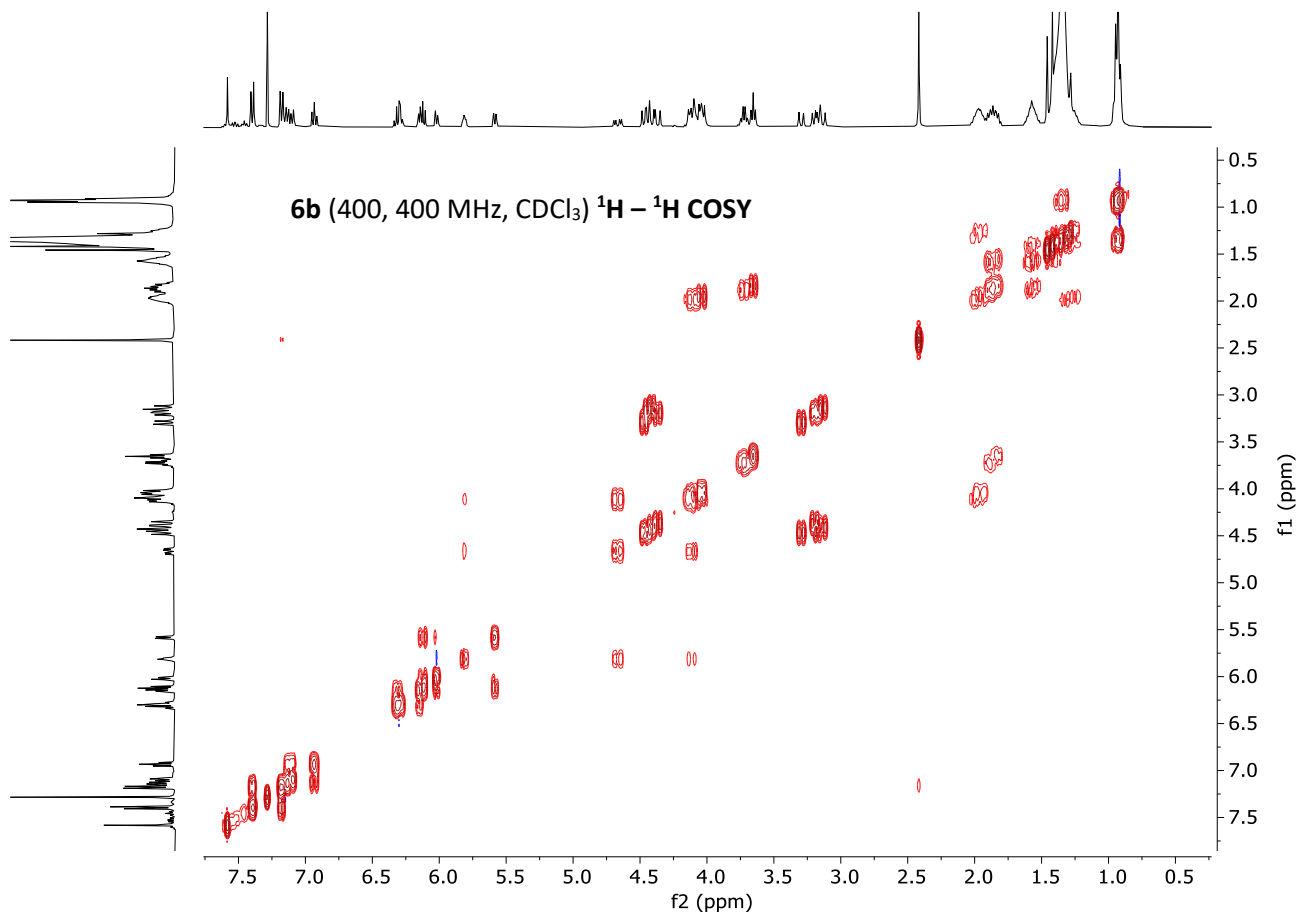





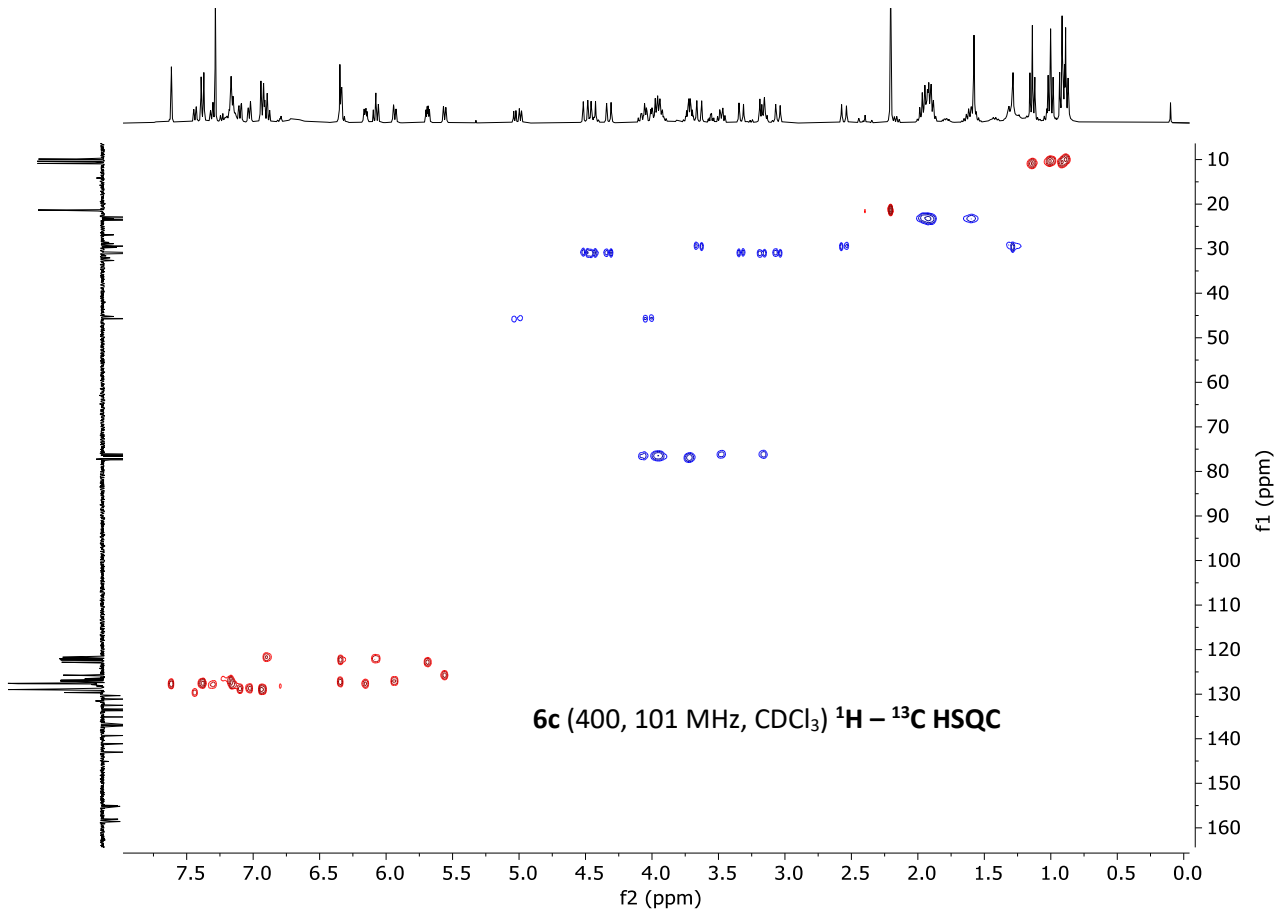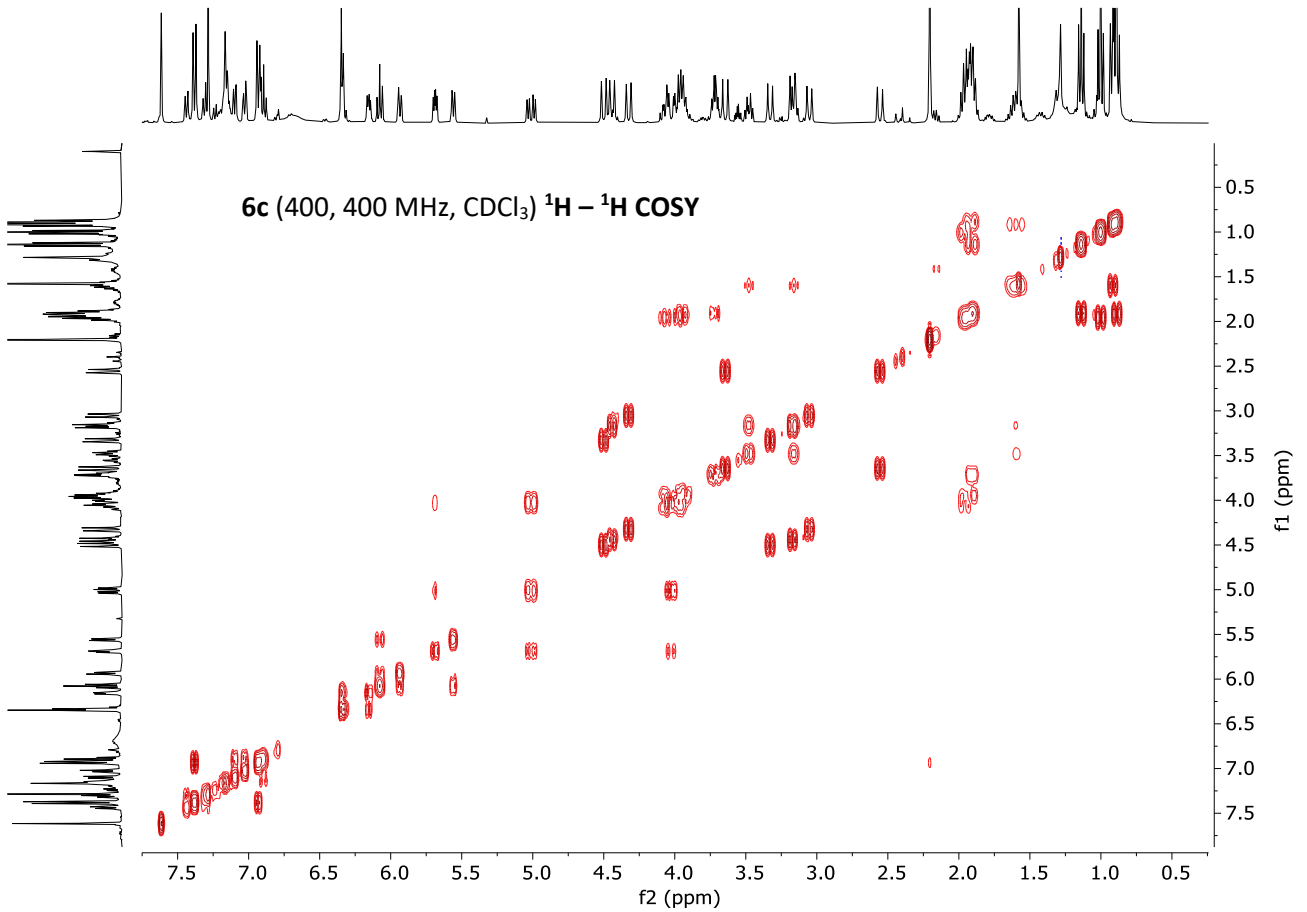

### Product 6d:

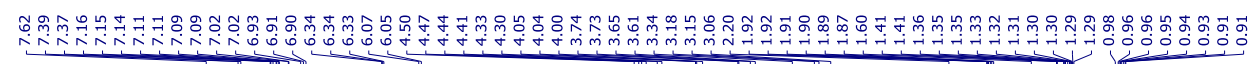

### 6d (400 MHz, CDCl<sub>3</sub>) <sup>1</sup>H-NMR

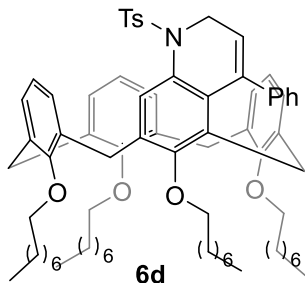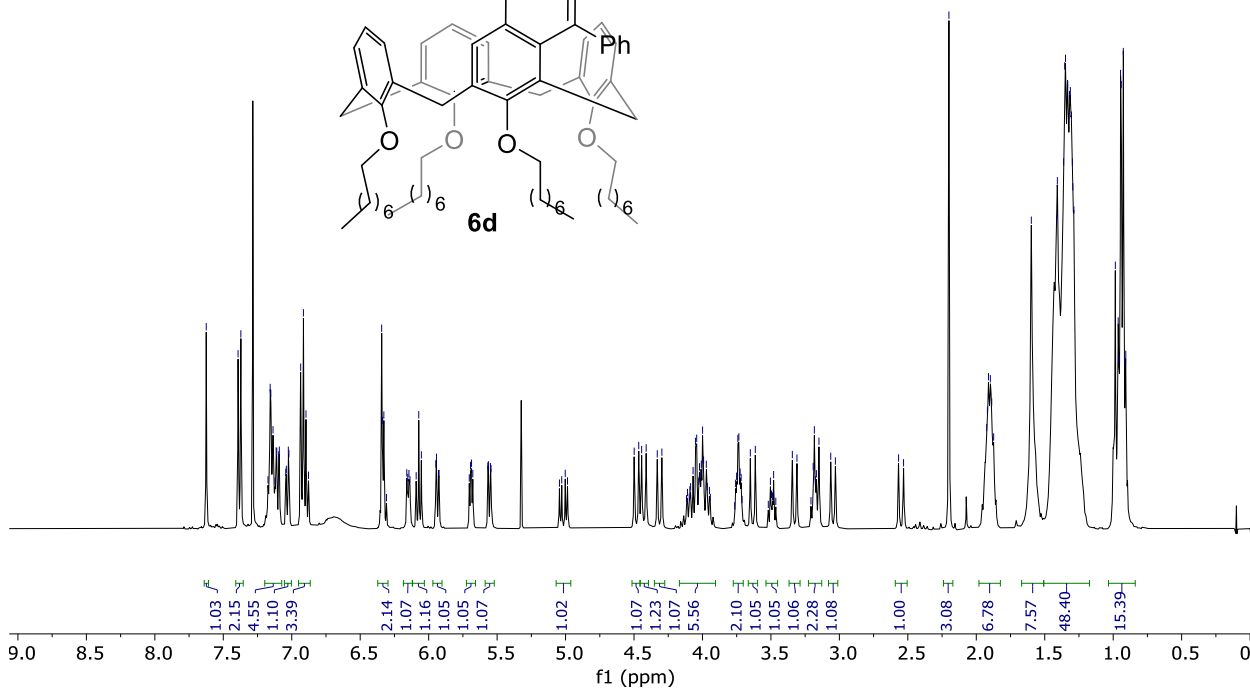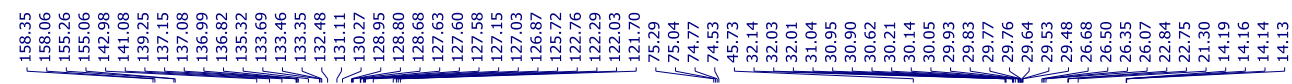

### 6d (101 MHz, CDCl<sub>3</sub>) <sup>13</sup>C-NMR

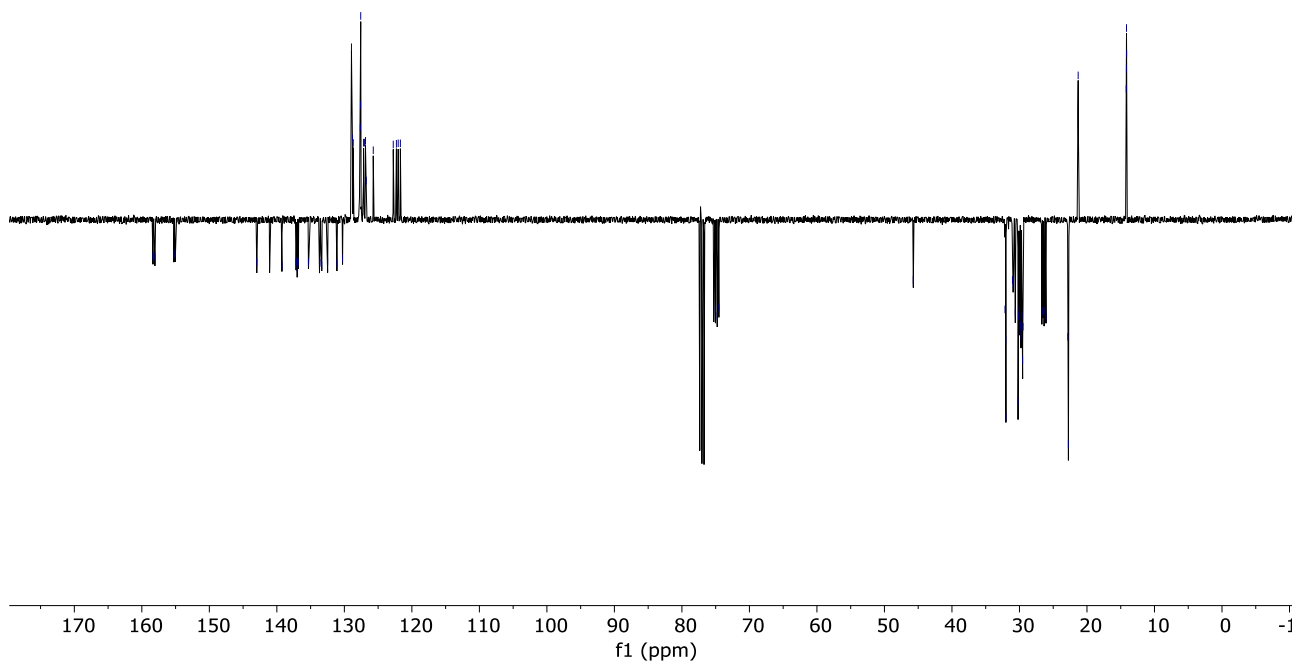

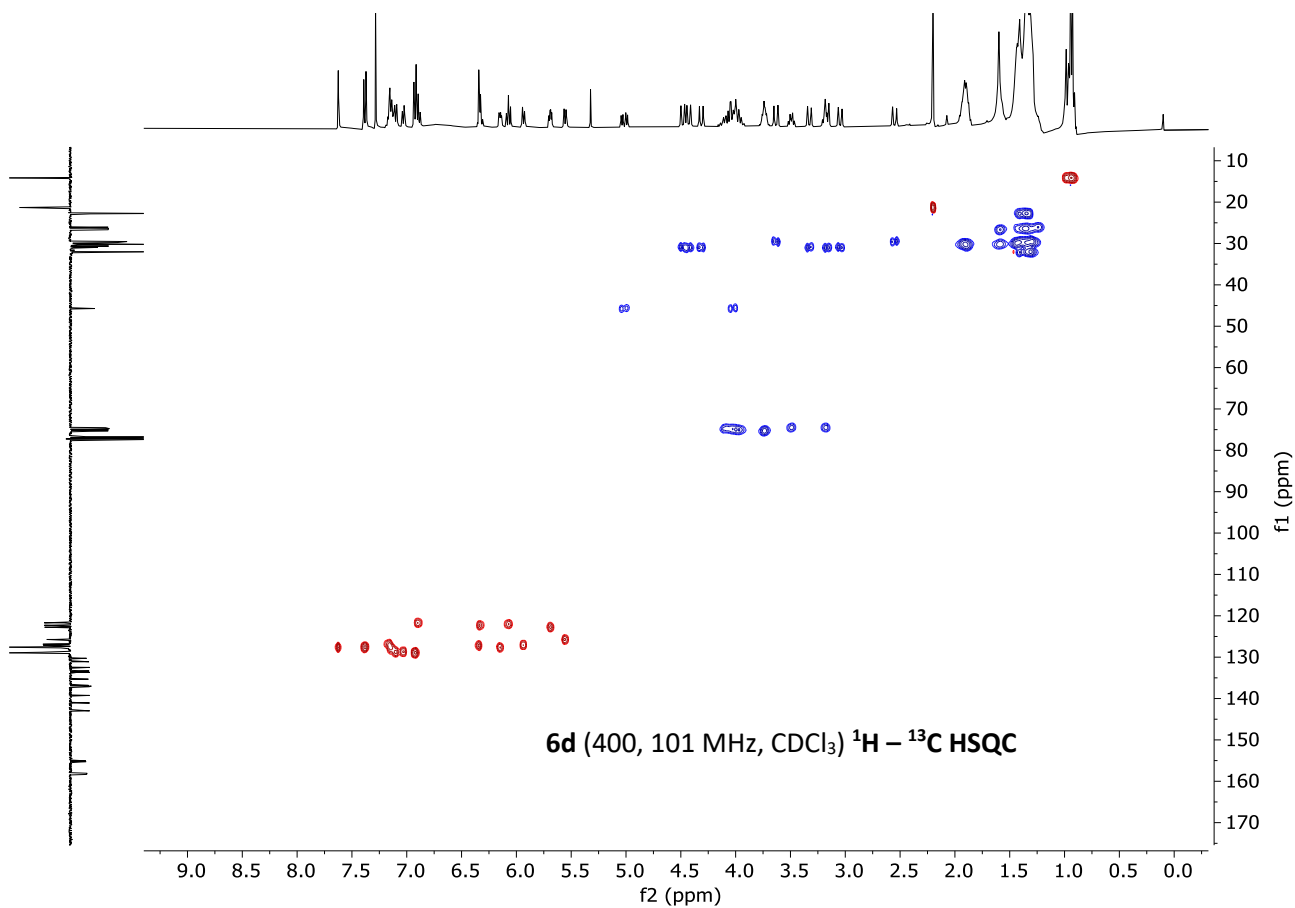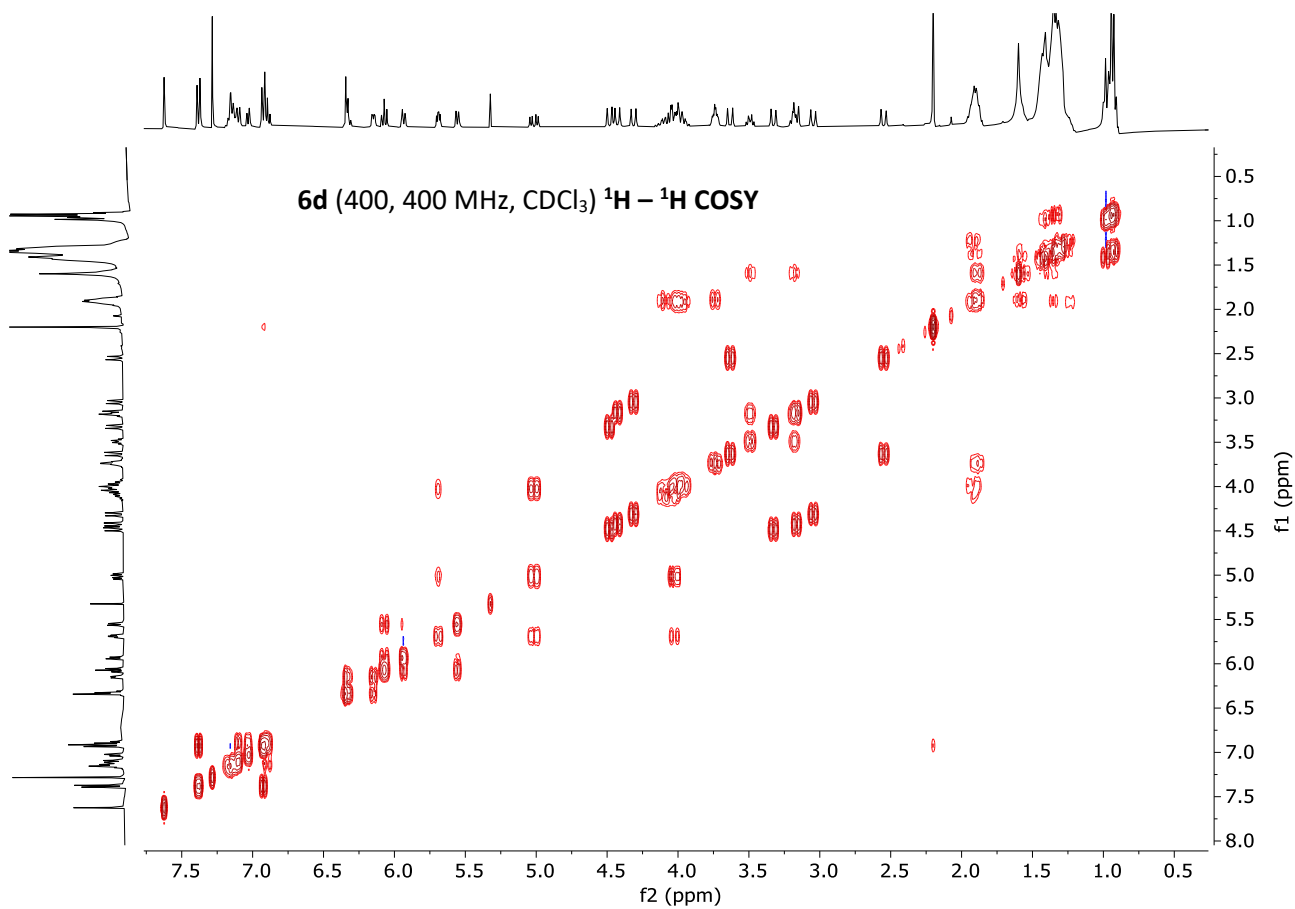

### Product 6e:

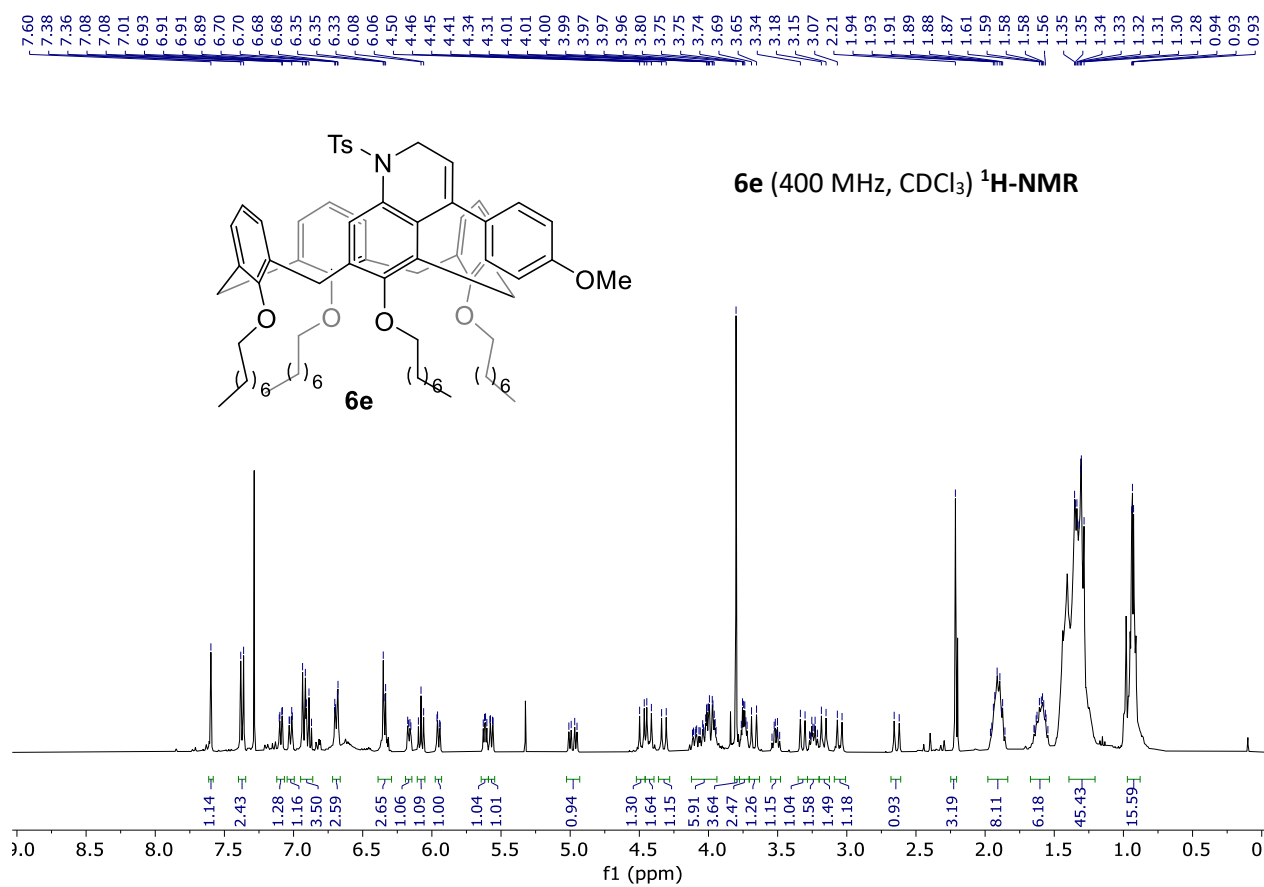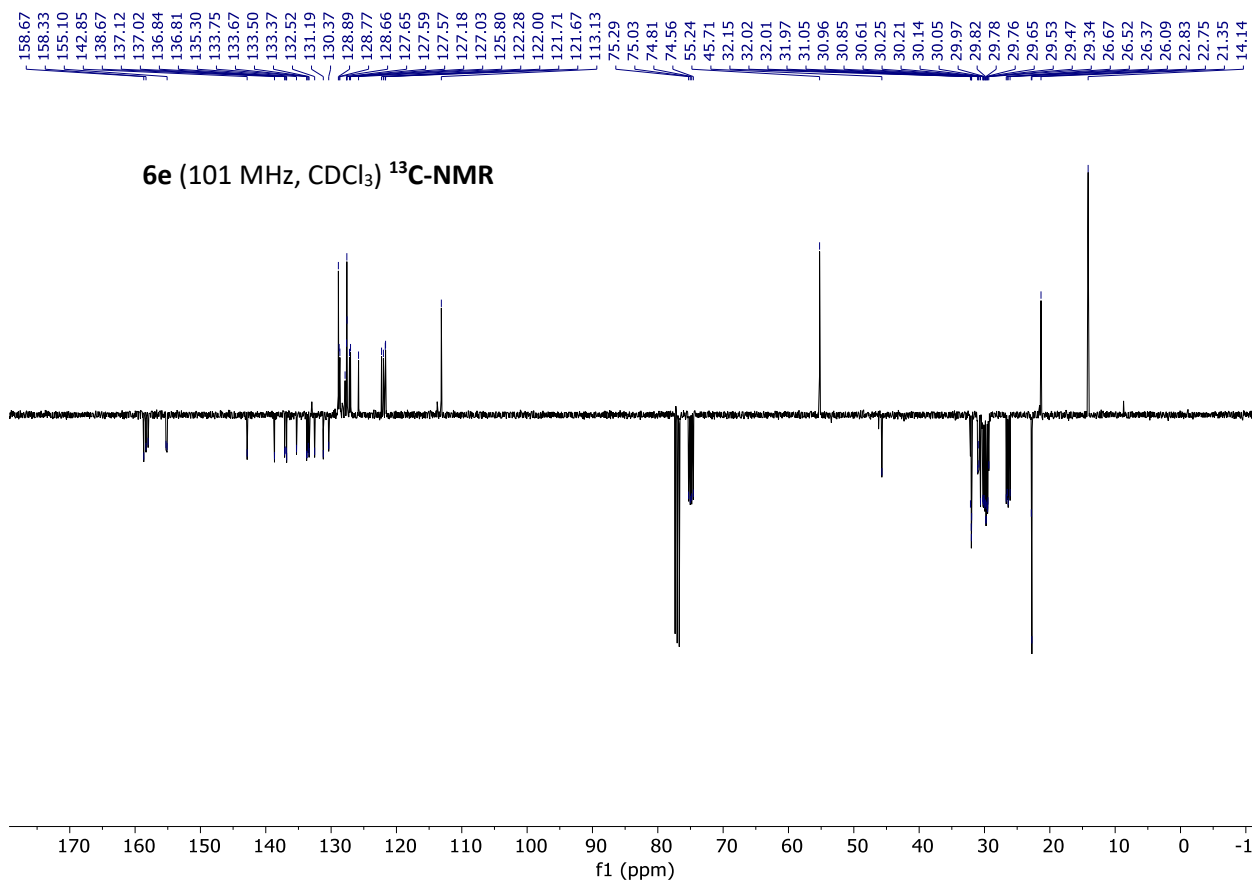

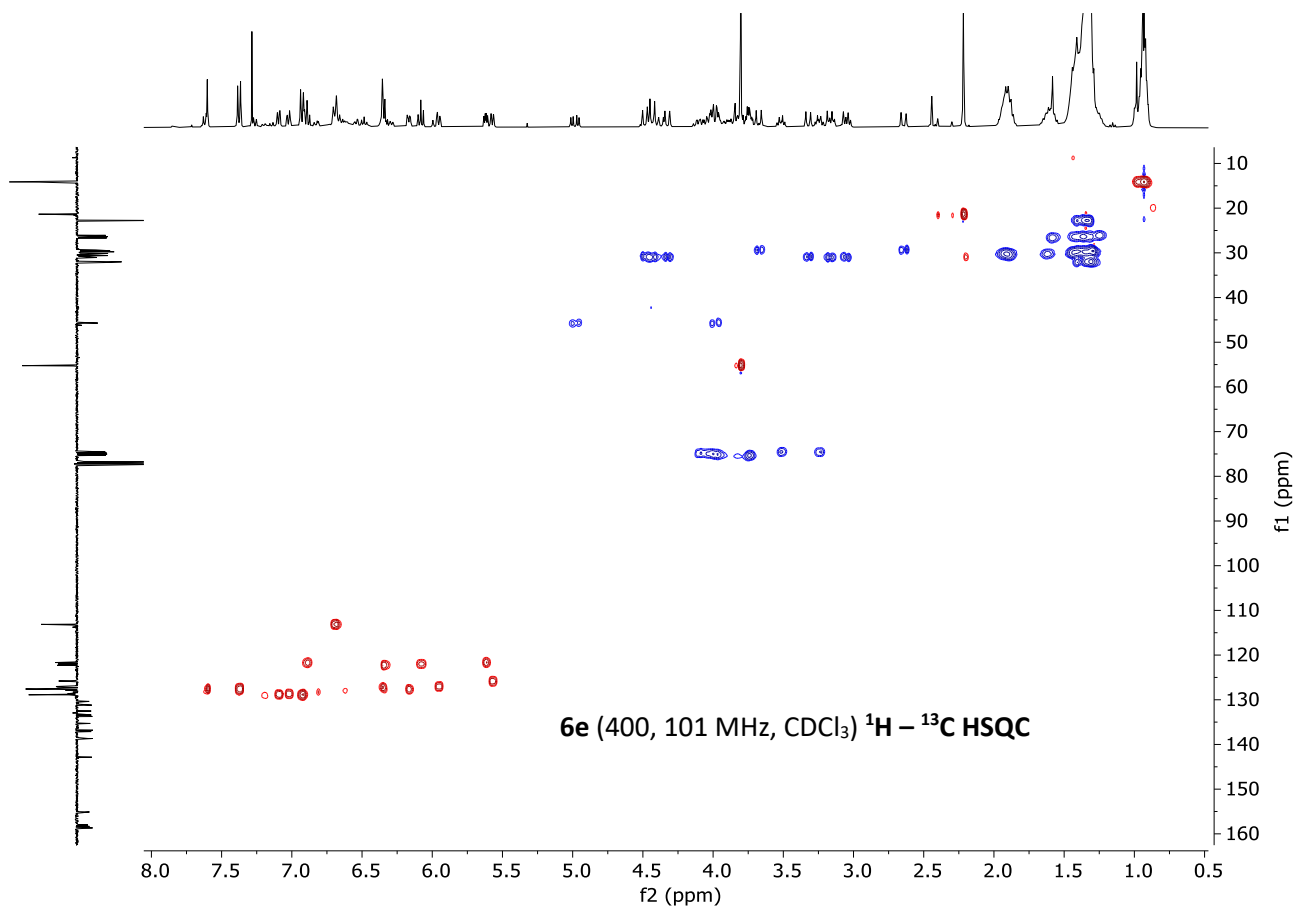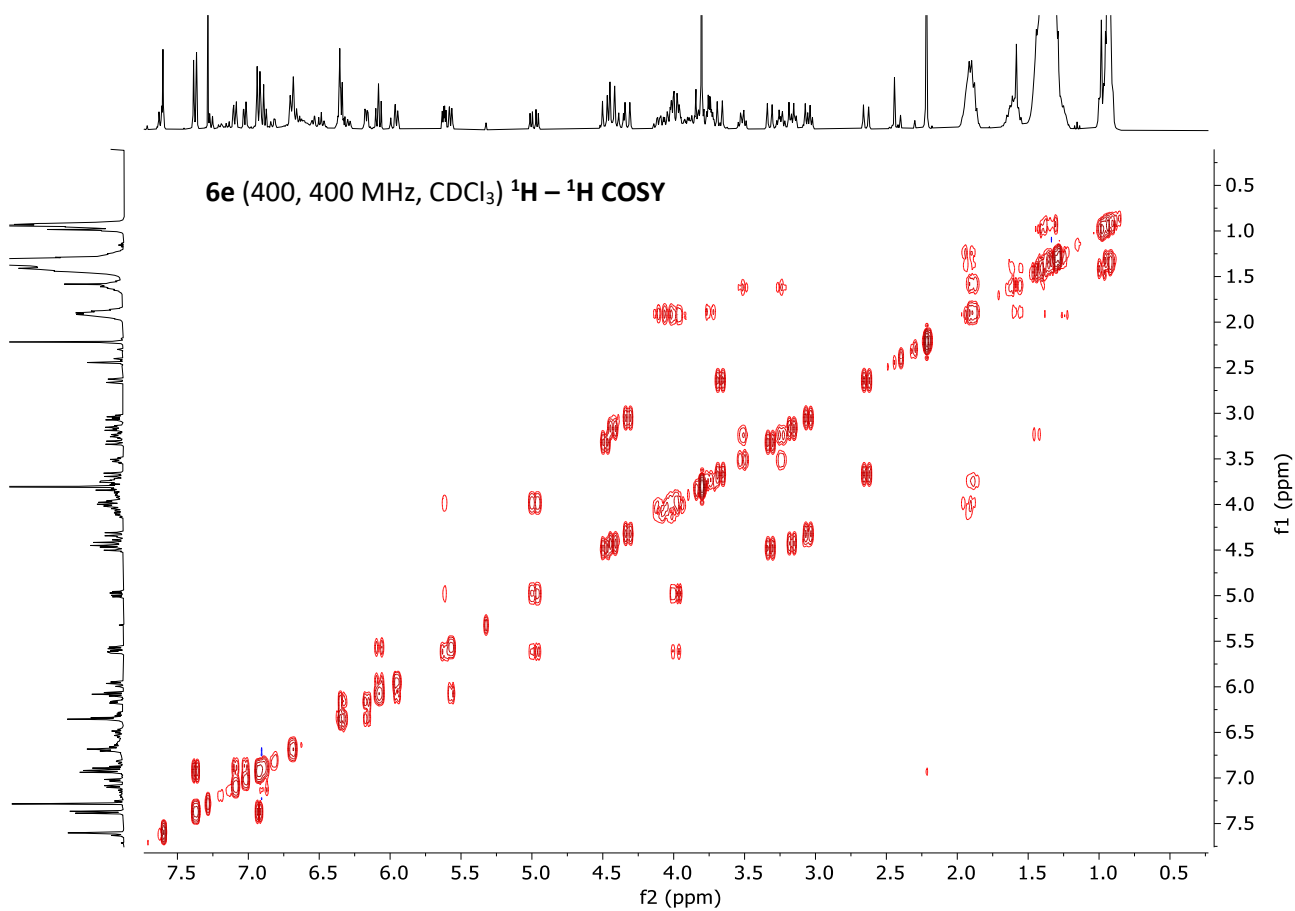

**Product 6f:**

7.62  
7.44  
7.42  
7.39  
7.37  
7.08  
7.00  
6.93  
6.91  
6.89  
6.37  
6.36  
6.35  
6.09  
6.07  
4.52  
4.49  
4.45  
4.42  
4.34  
4.30  
4.03  
4.00  
3.99  
3.76  
3.75  
3.71  
3.67  
3.36  
3.19  
3.16  
2.18  
1.94  
1.92  
1.90  
1.88  
1.61  
1.59  
1.58  
1.57  
1.56  
1.45  
1.45  
1.42  
1.41  
1.40  
1.38  
1.37  
1.36  
1.35  
1.34  
1.33  
1.32  
1.31  
1.30  
1.30  
1.29  
1.28  
0.95  
0.95  
0.94  
0.93  
0.92  
0.91

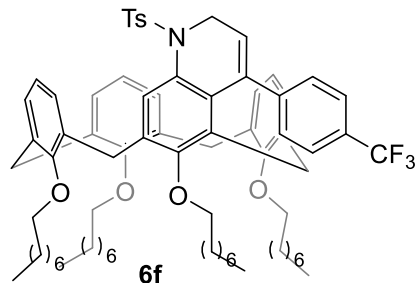

**6f (400 MHz, CDCl<sub>3</sub>) <sup>1</sup>H-NMR**

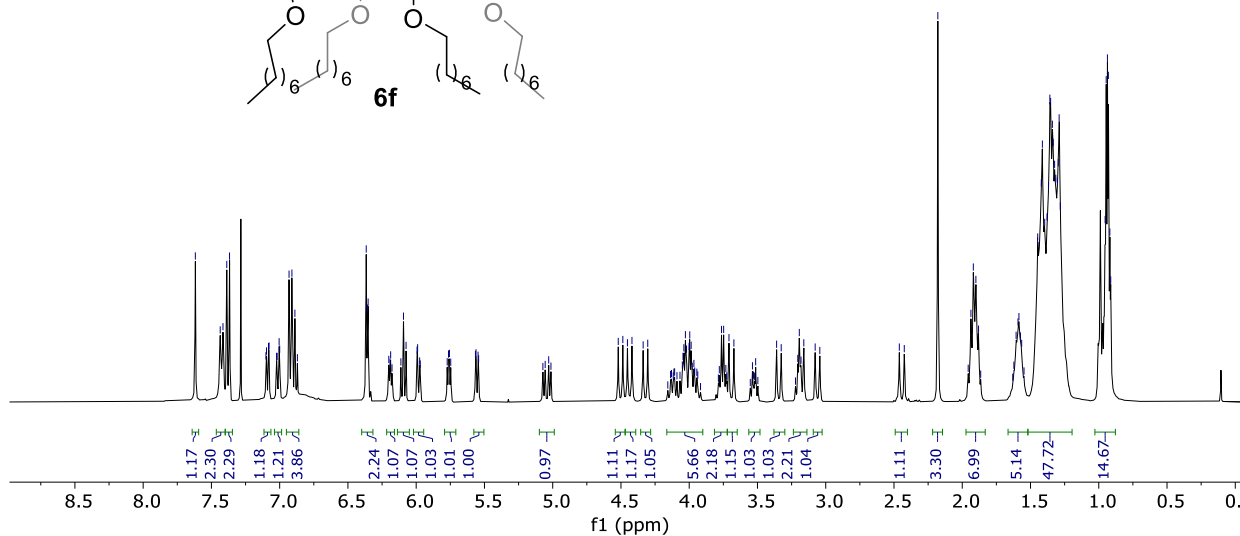

158.41  
157.98  
155.34  
155.12  
143.09  
138.01  
137.52  
137.02  
136.93  
136.88  
134.78  
133.63  
133.59  
133.22  
132.39  
131.18  
129.51  
129.00  
128.83  
128.64  
127.80  
127.76  
127.59  
127.35  
127.18  
125.63  
124.67  
122.33  
122.03  
121.76  
75.34  
75.09  
74.91  
74.67  
45.65  
32.15  
32.03  
32.01  
31.93  
31.04  
30.96  
30.61  
30.22  
30.21  
30.17  
30.05  
30.01  
29.92  
29.83  
29.78  
29.74  
29.62  
29.54  
29.43  
26.67  
26.50  
26.36  
26.08  
22.83  
22.75  
22.72  
21.18  
14.15  
14.11

**6f (101 MHz, CDCl<sub>3</sub>) <sup>13</sup>C-NMR**

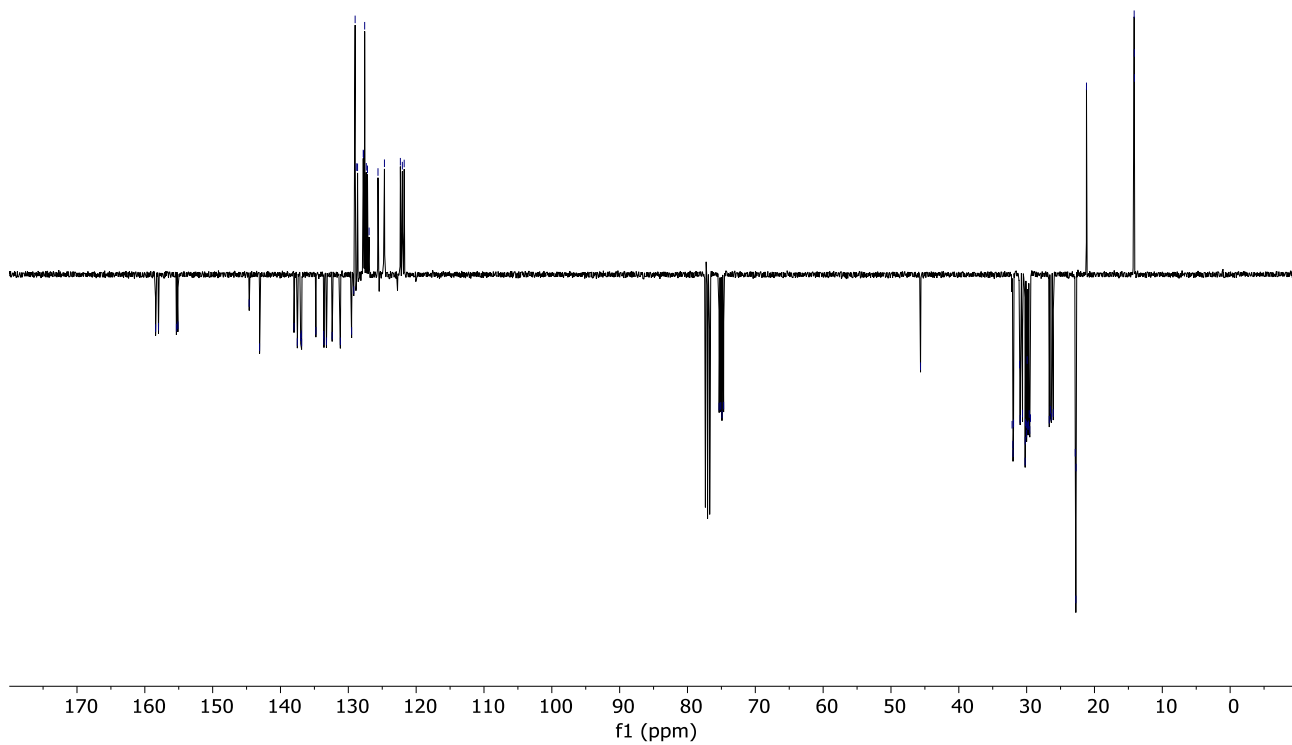

-62.50

6f (565 MHz, CDCl<sub>3</sub>) <sup>19</sup>F-NMR

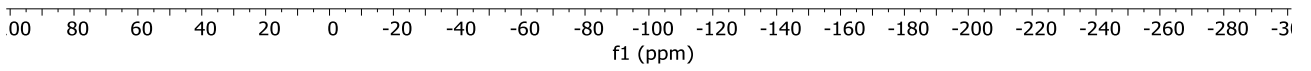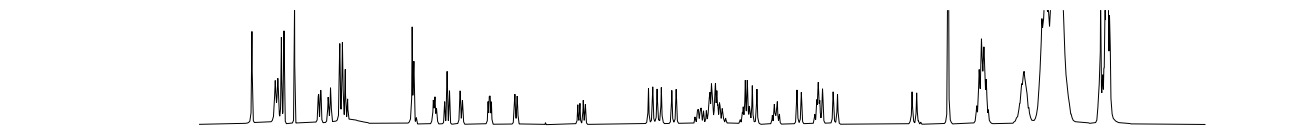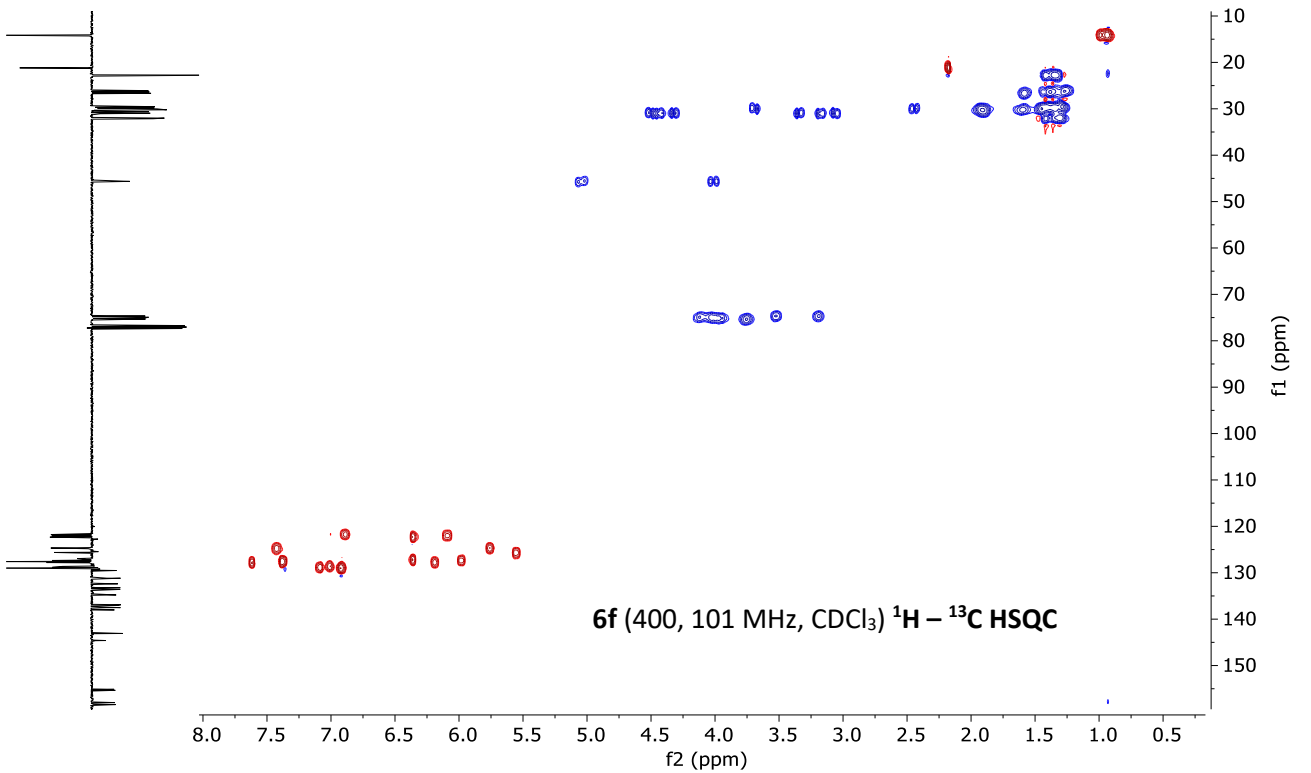

6f (400, 101 MHz, CDCl<sub>3</sub>) <sup>1</sup>H - <sup>13</sup>C HSQC



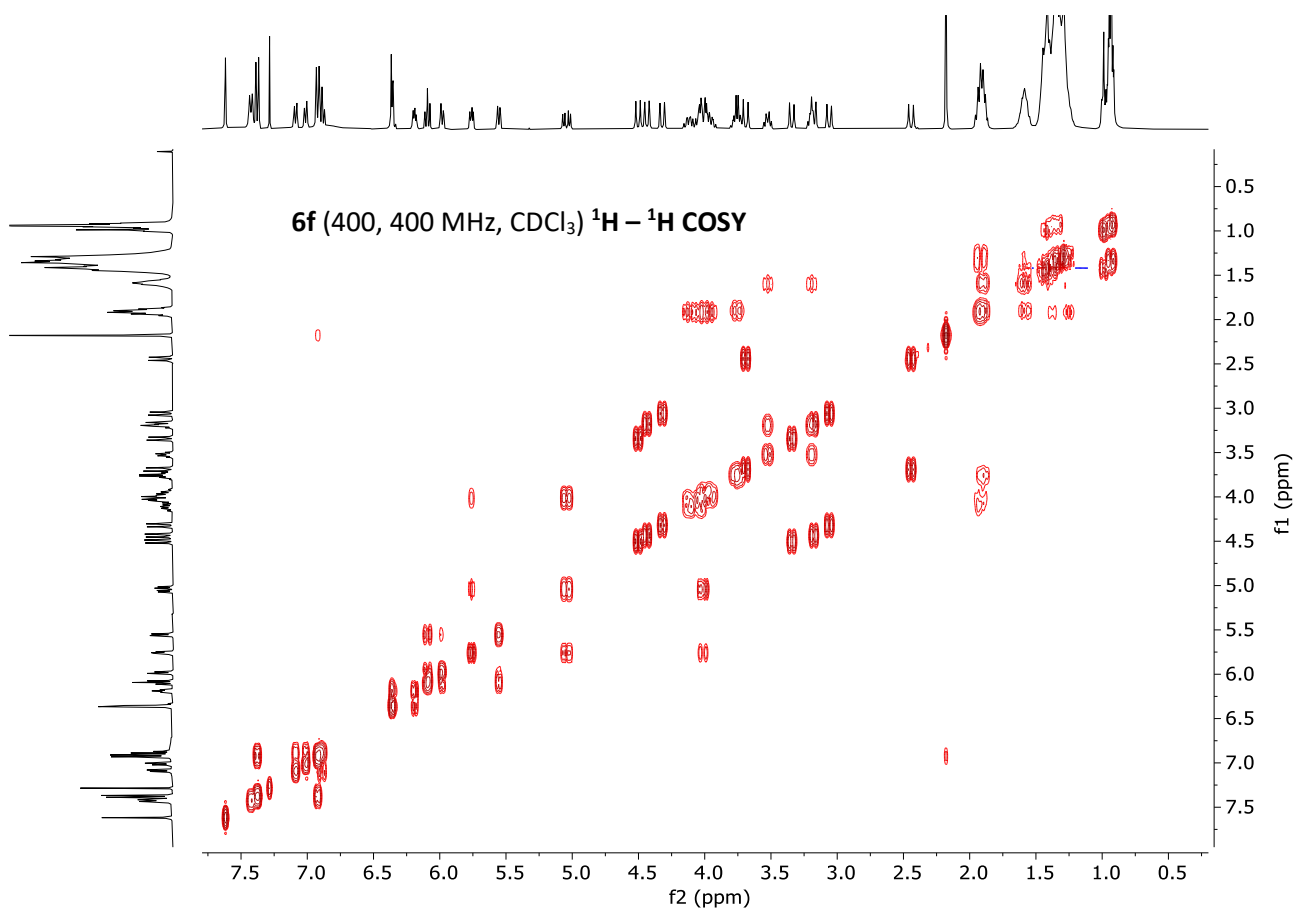

**Product 6g:**

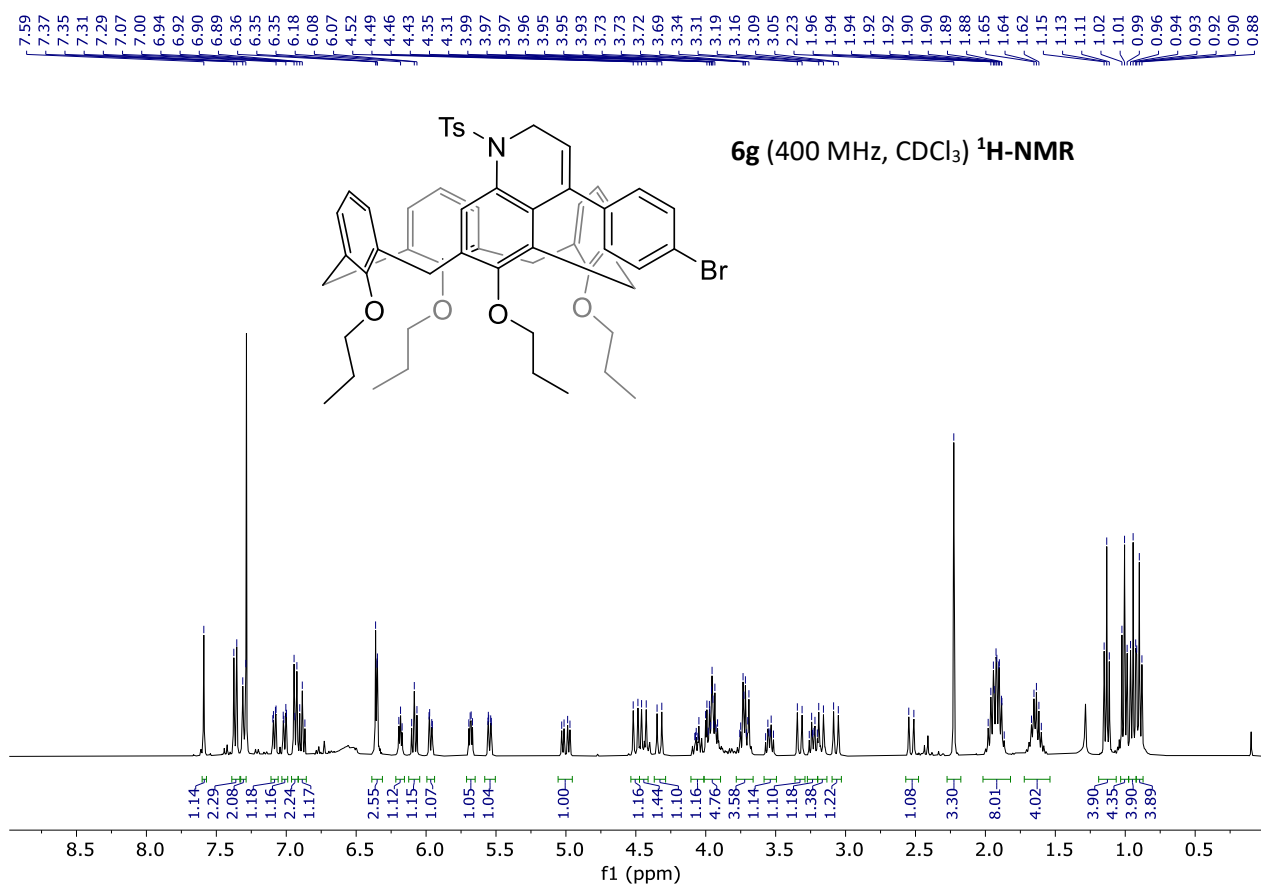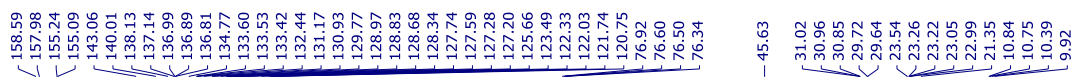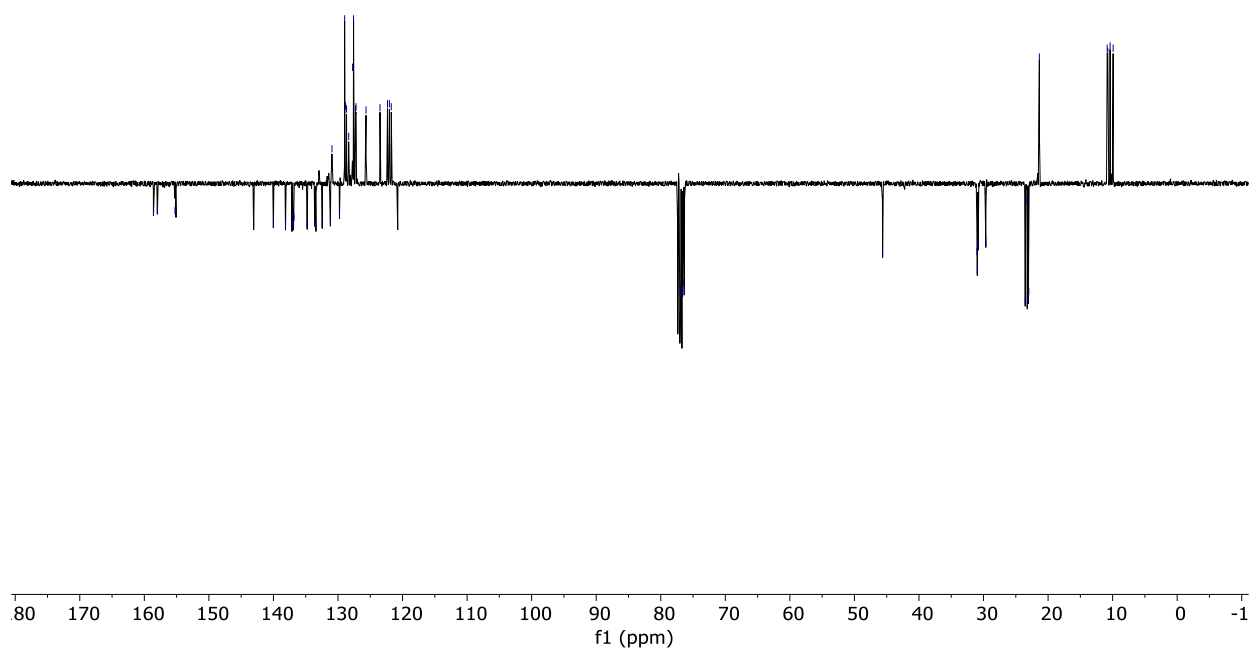

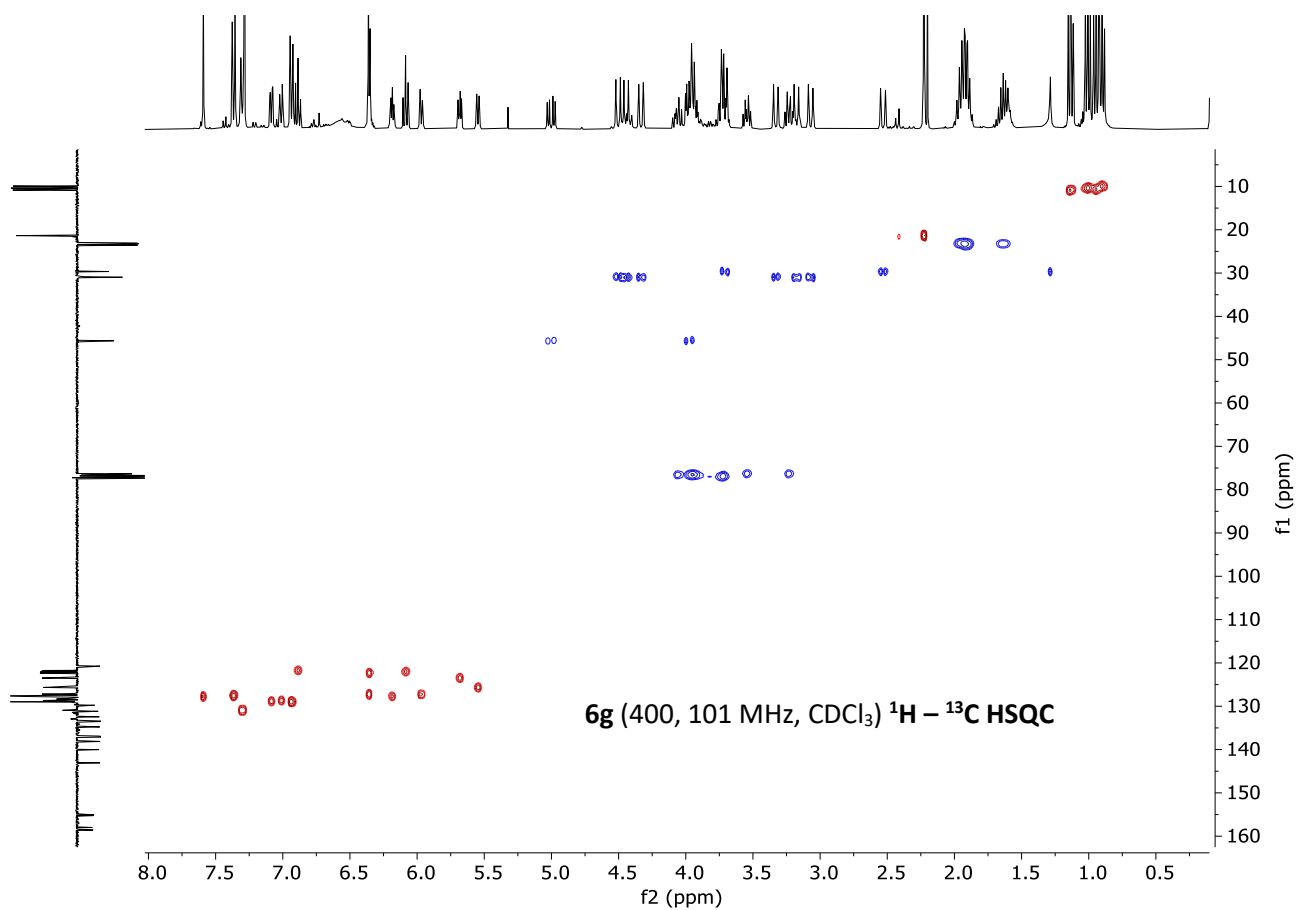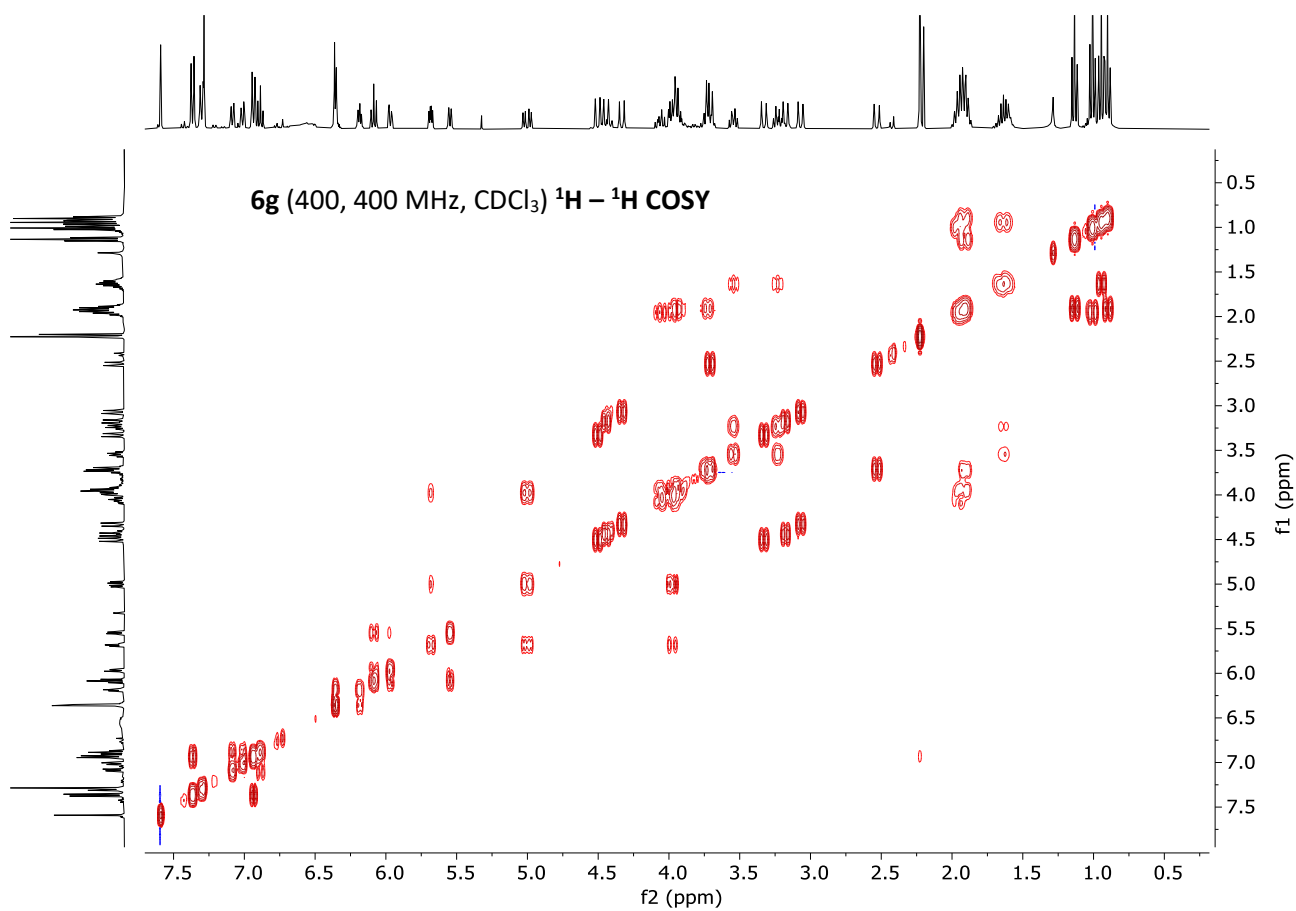

Product 6h:

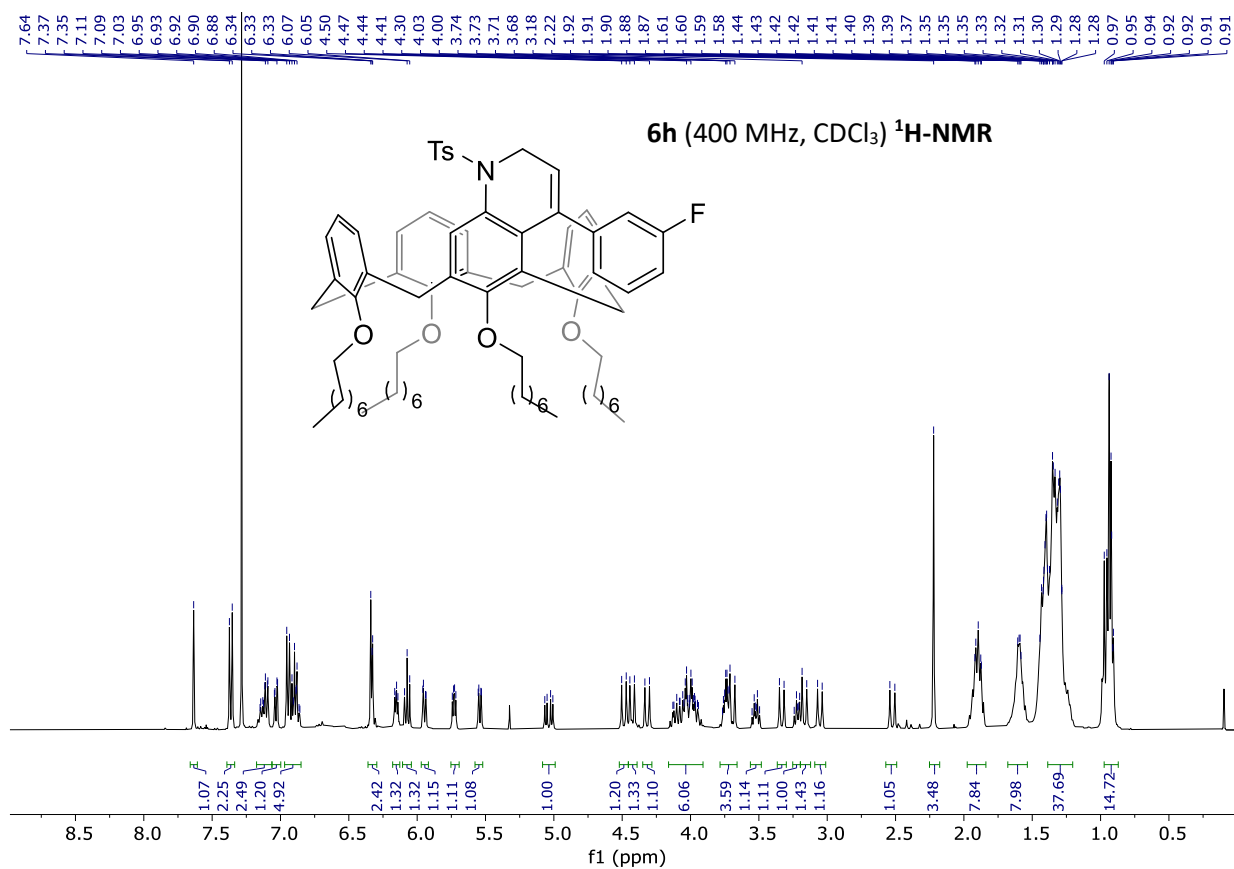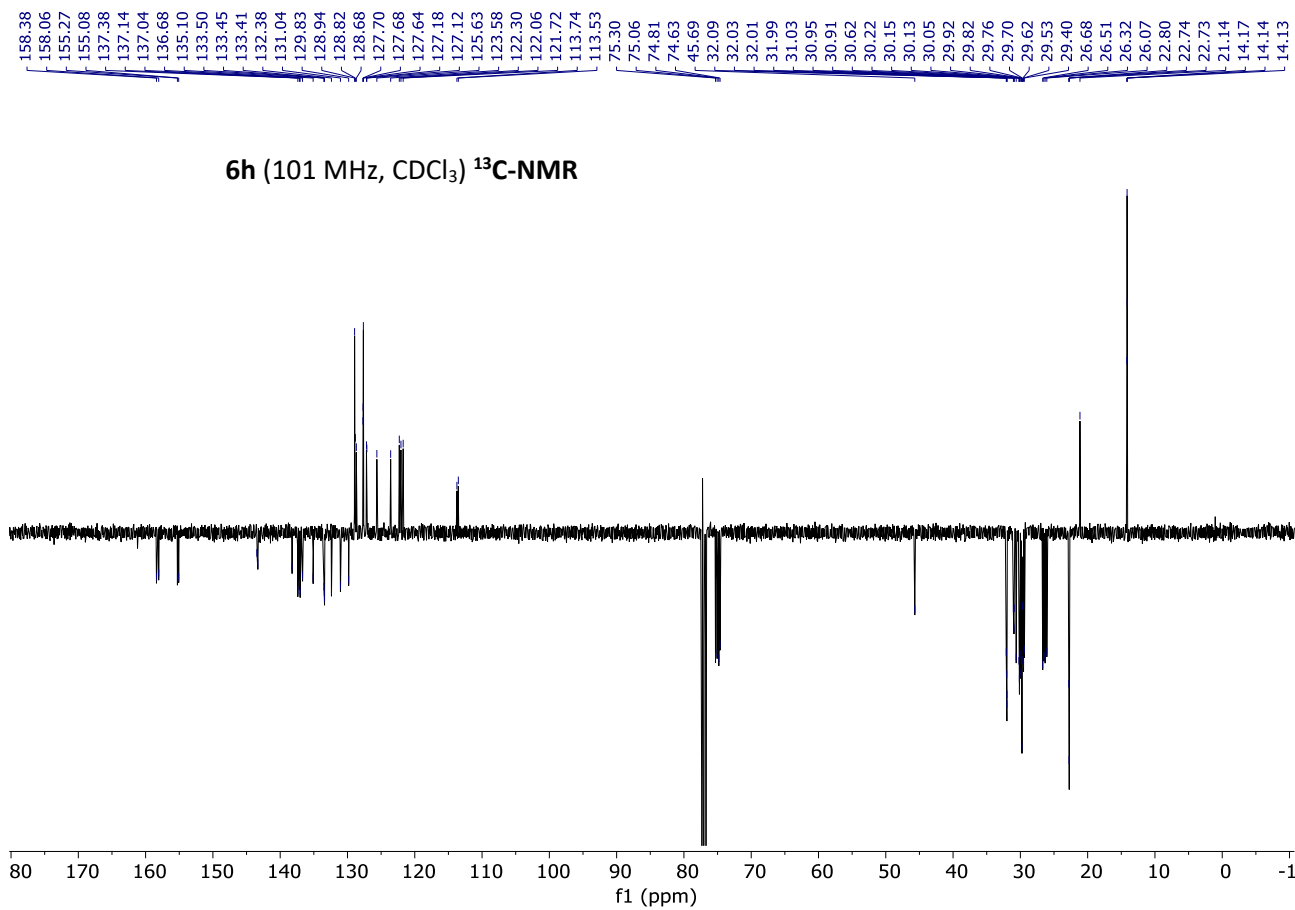

6h (565 MHz, CDCl<sub>3</sub>) <sup>19</sup>F-NMR

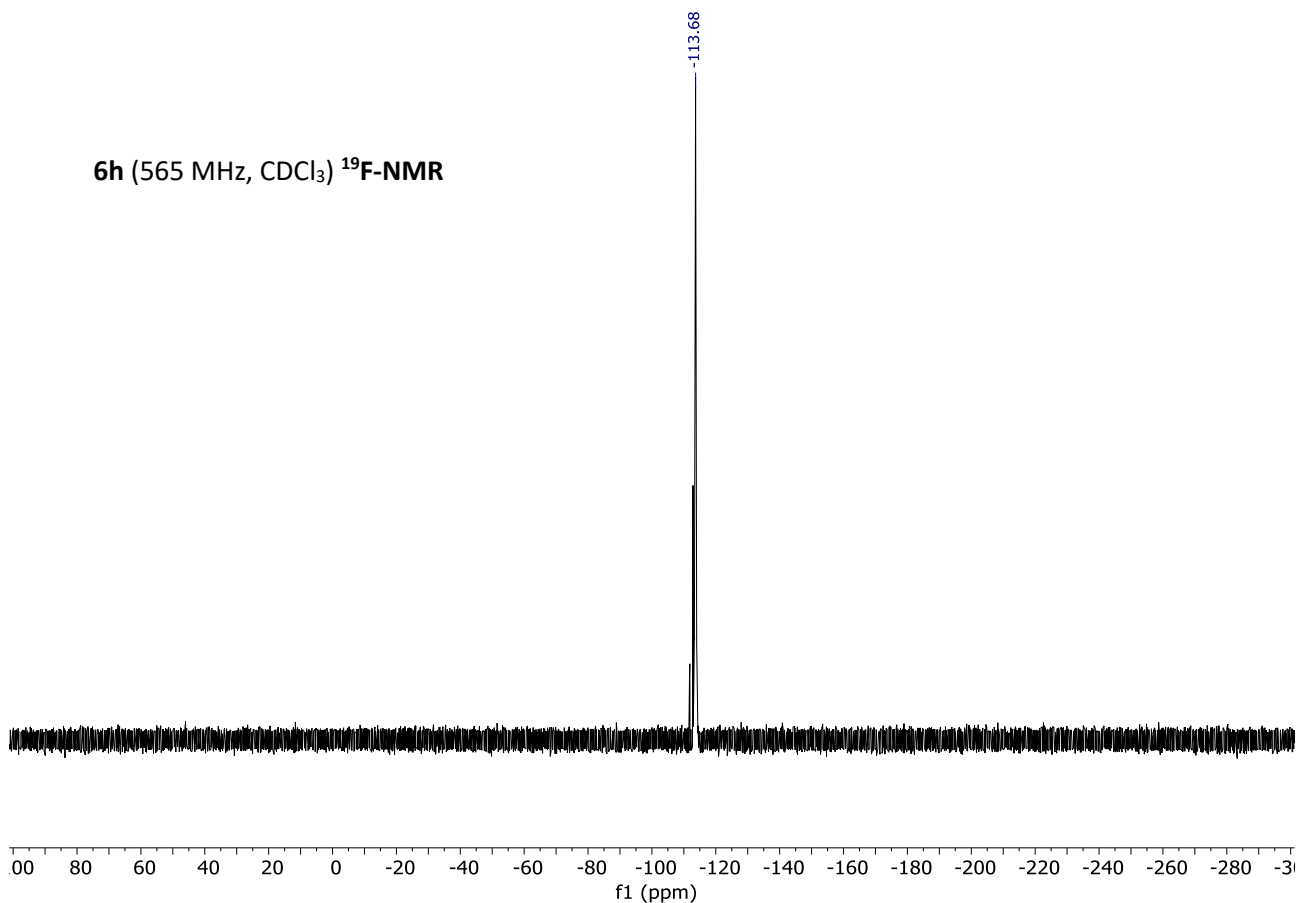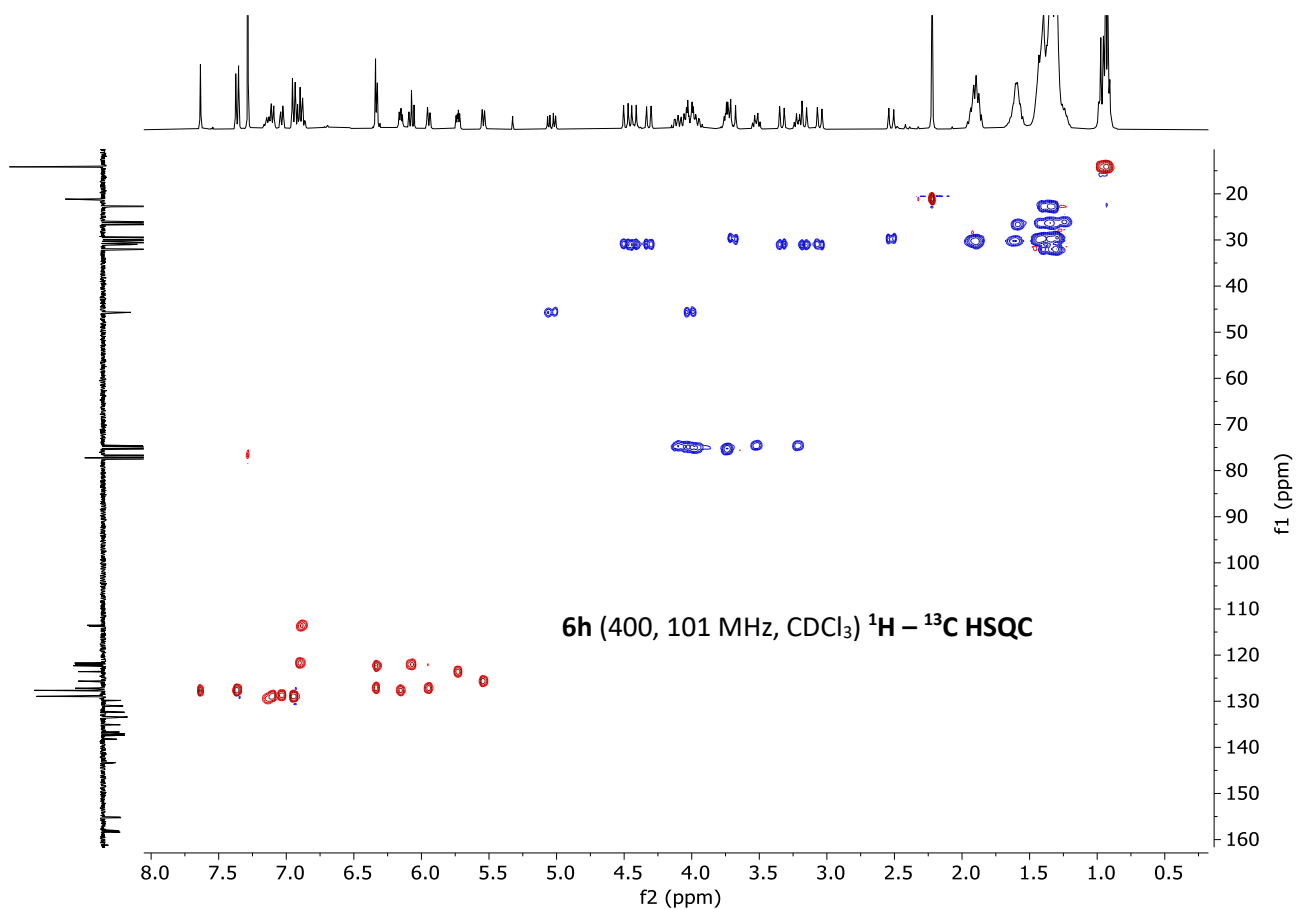

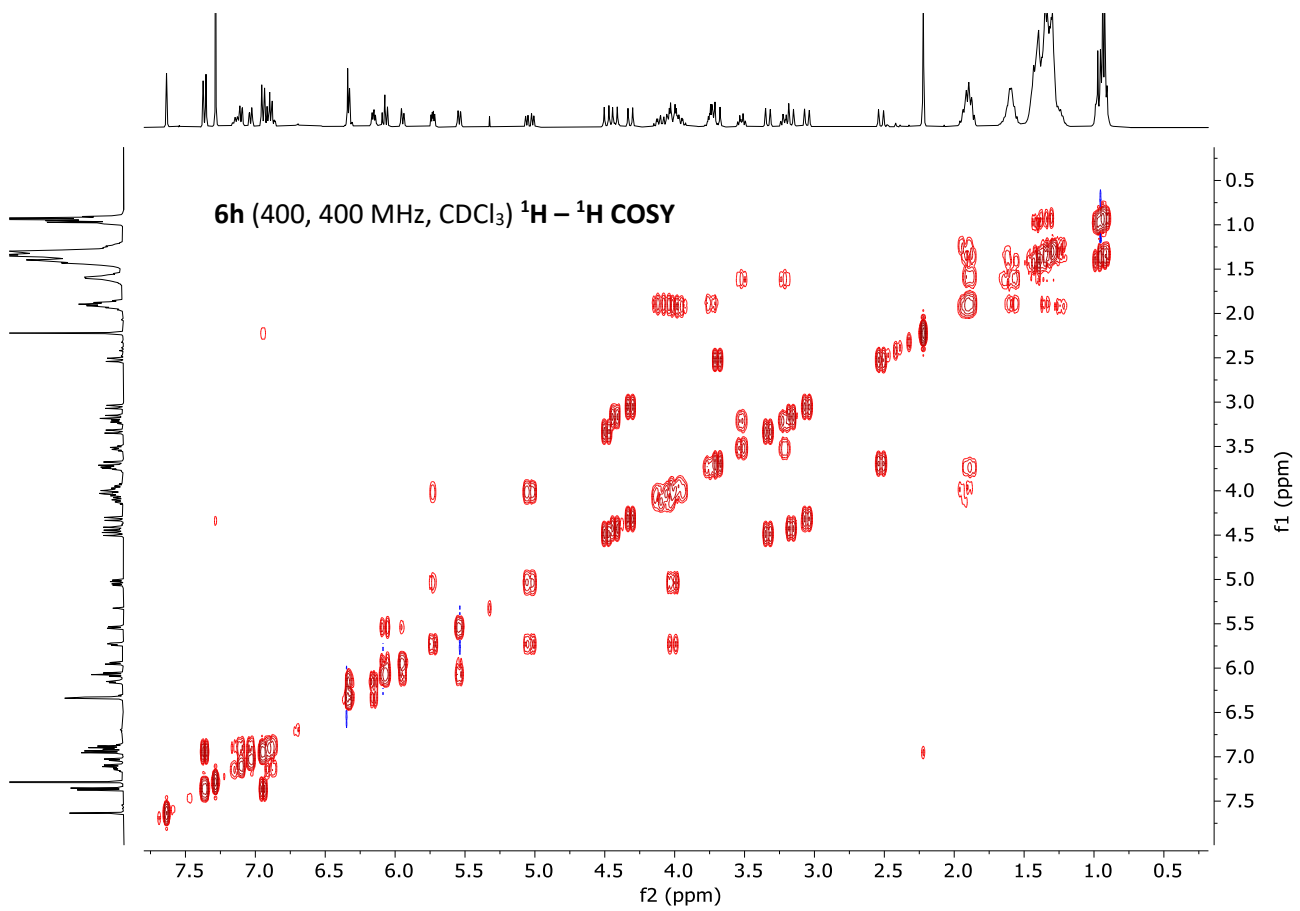

**Product 6i:**

7.57, 7.38, 7.36, 7.10, 7.10, 7.09, 7.08, 7.08, 7.01, 6.95, 6.93, 6.91, 6.89, 6.84, 6.83, 6.82, 6.46, 6.45, 6.45, 6.44, 6.36, 6.35, 6.35, 6.08, 6.06, 5.73, 4.51, 4.47, 4.45, 4.42, 4.36, 4.32, 4.03, 3.98, 3.91, 3.87, 3.75, 3.74, 3.33, 3.30, 3.19, 3.16, 3.08, 3.05, 2.85, 2.21, 1.95, 1.94, 1.94, 1.93, 1.91, 1.90, 1.89, 1.87, 1.58, 1.35, 1.34, 1.33, 1.32, 0.94, 0.94, 0.93, 0.92

**6i (400 MHz, CDCl<sub>3</sub>) <sup>1</sup>H-NMR**

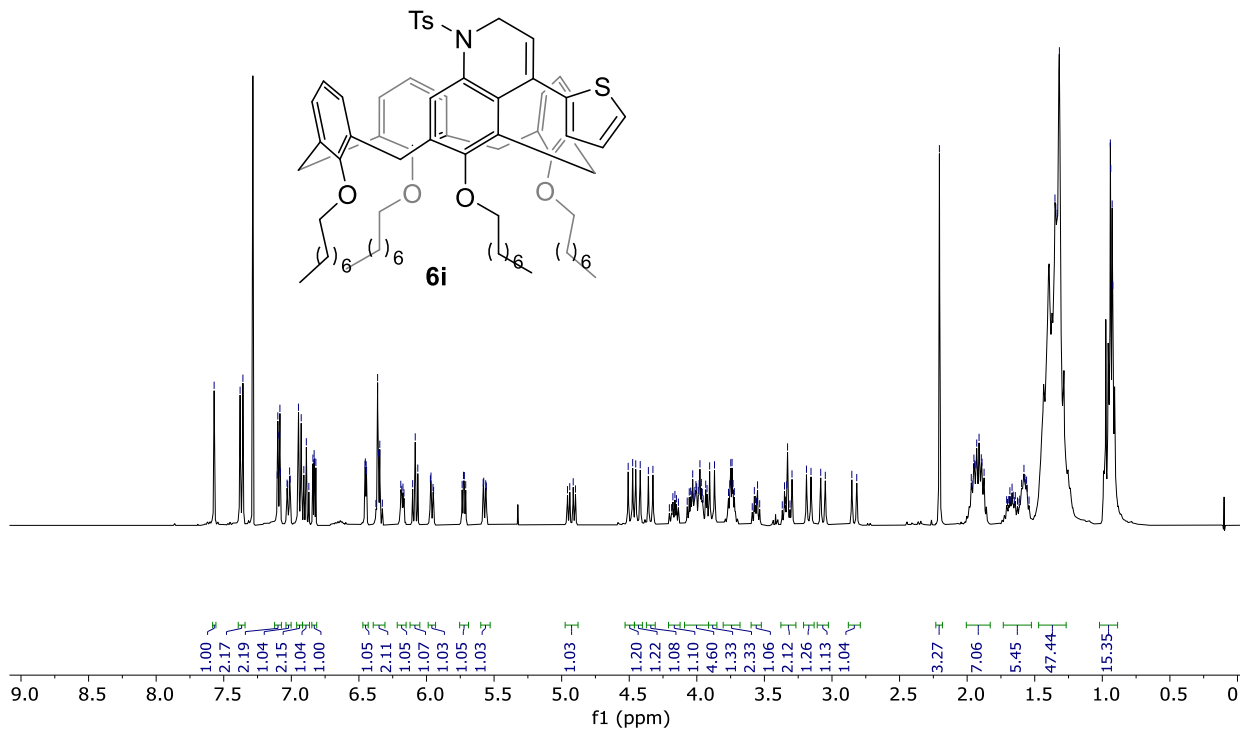

158.55, 158.00, 155.30, 155.17, 143.53, 143.06, 137.18, 136.76, 133.64, 133.57, 132.48, 129.05, 128.77, 128.66, 127.69, 127.50, 127.33, 127.19, 127.12, 126.34, 125.80, 124.64, 124.10, 122.72, 122.29, 122.05, 121.72, 75.30, 75.04, 74.57, 45.47, 32.12, 32.02, 31.07, 30.97, 30.80, 30.60, 30.29, 30.14, 30.05, 29.83, 29.75, 29.73, 29.66, 29.53, 29.51, 26.66, 26.55, 26.33, 26.09, 22.83, 22.76, 22.74, 21.36, 14.18, 14.16, 14.13

**6i (101 MHz, CDCl<sub>3</sub>) <sup>13</sup>C-NMR**

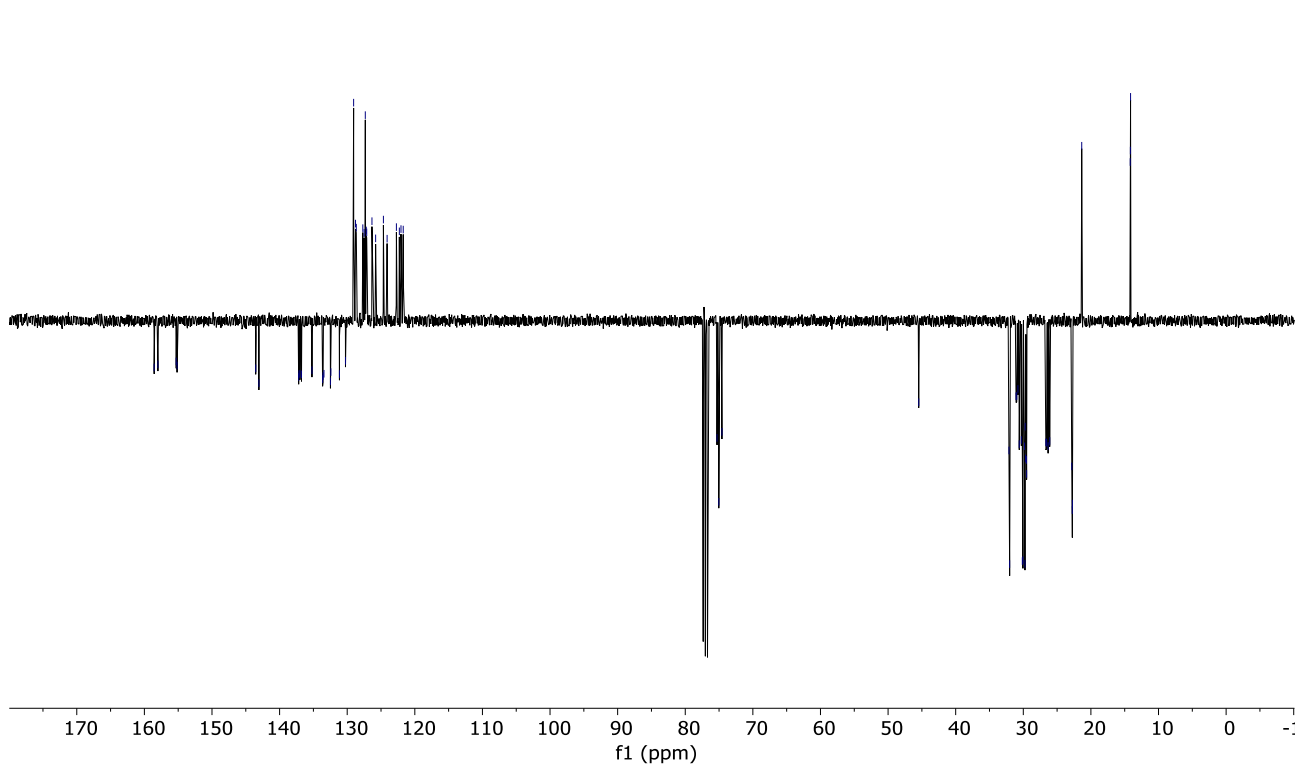

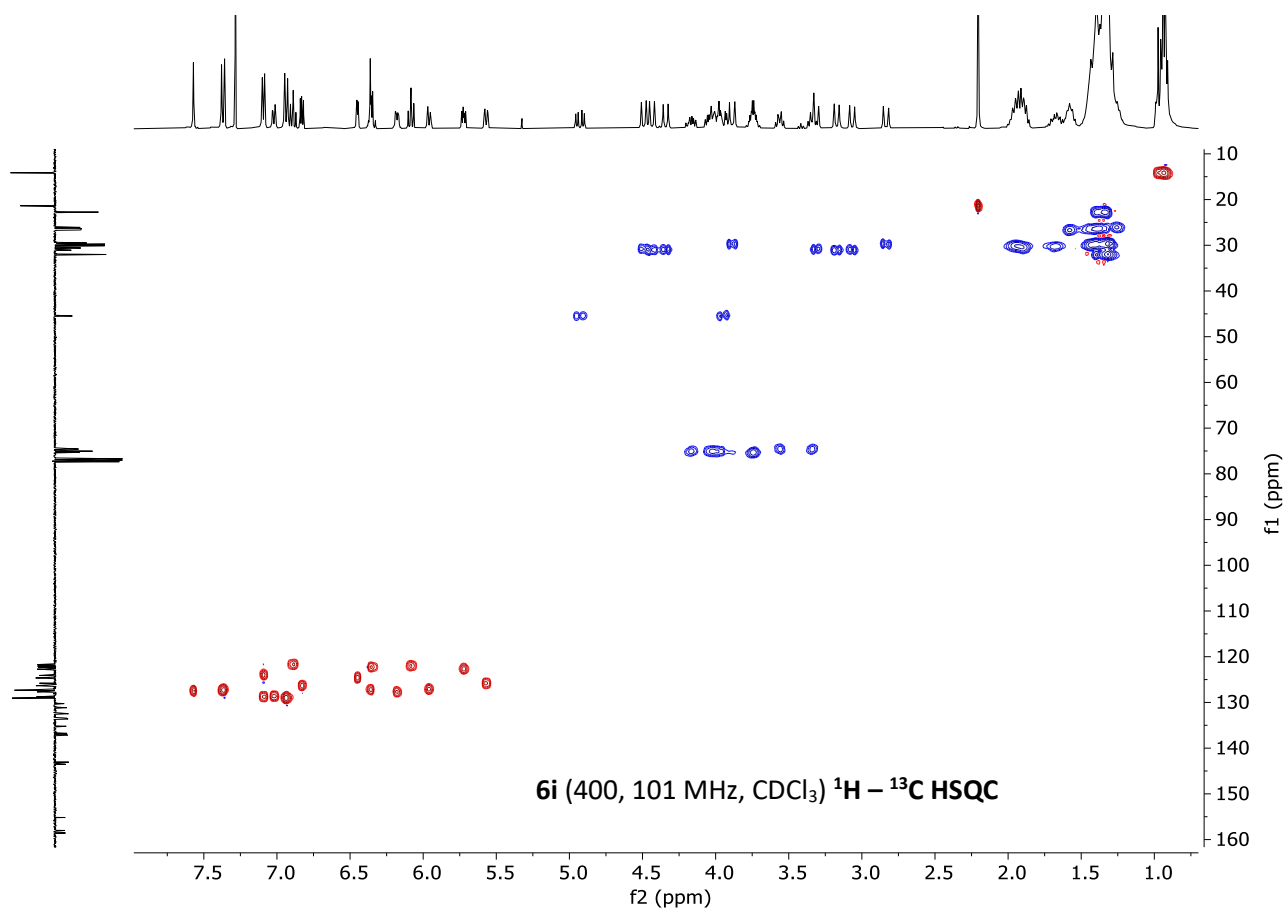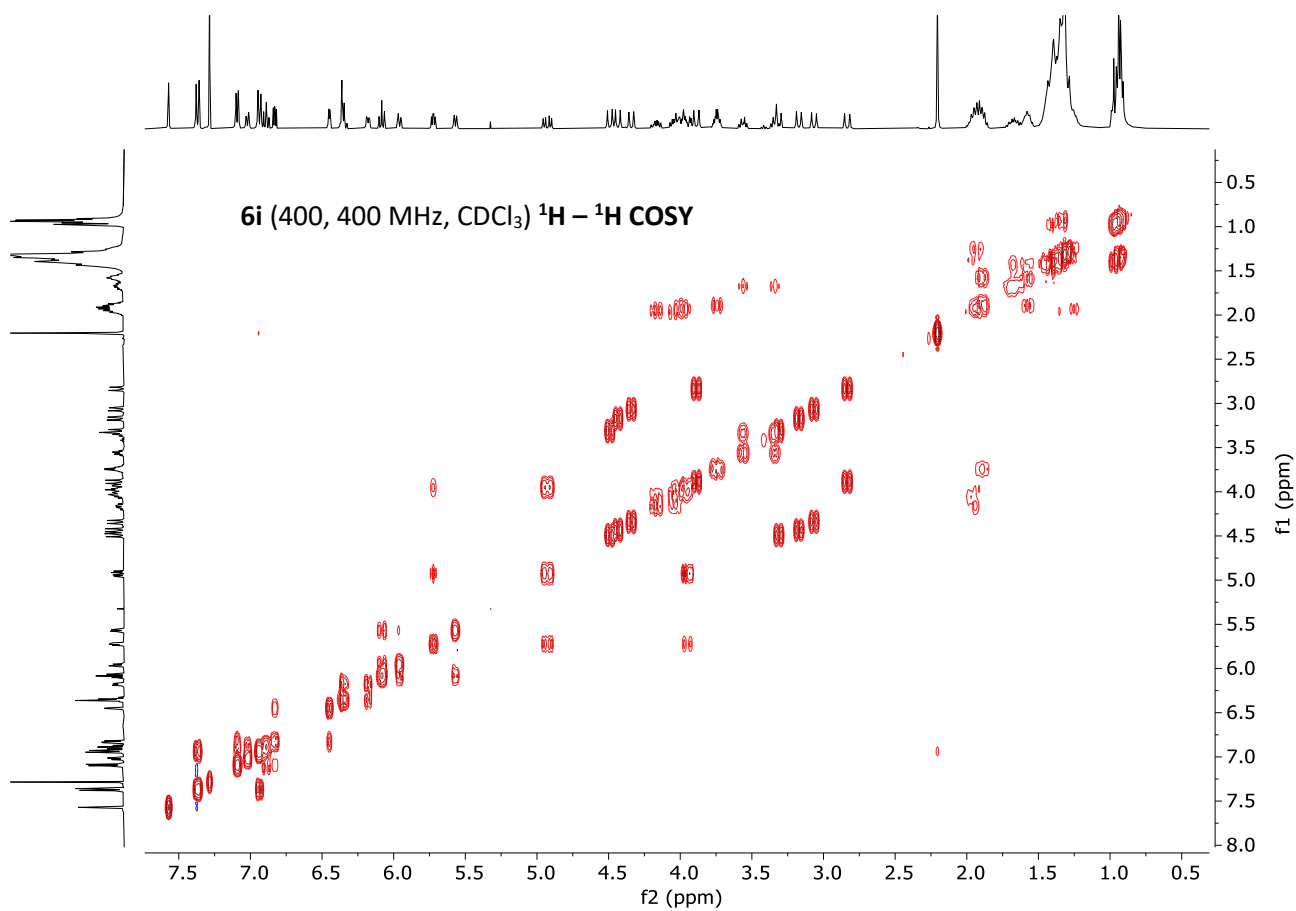



**Product 6j:**

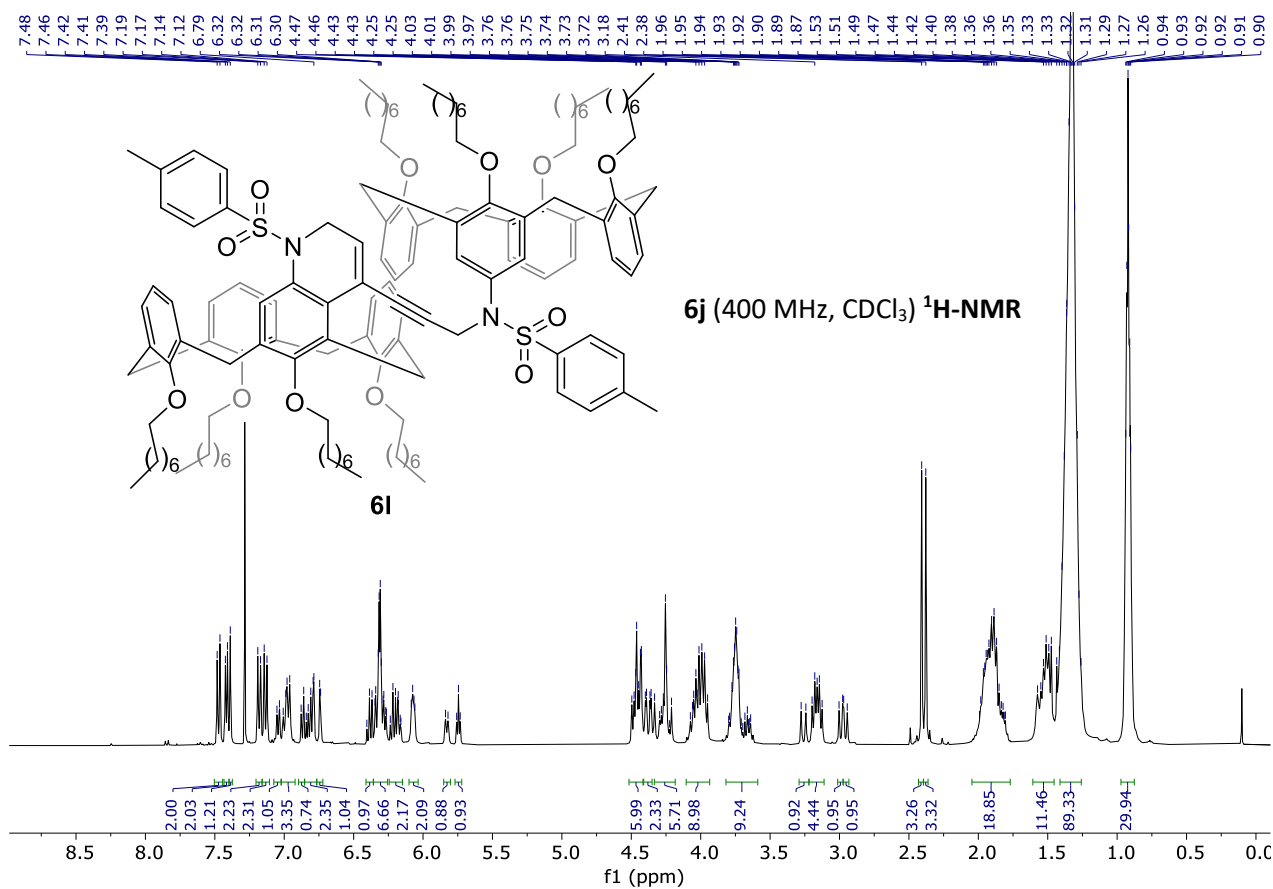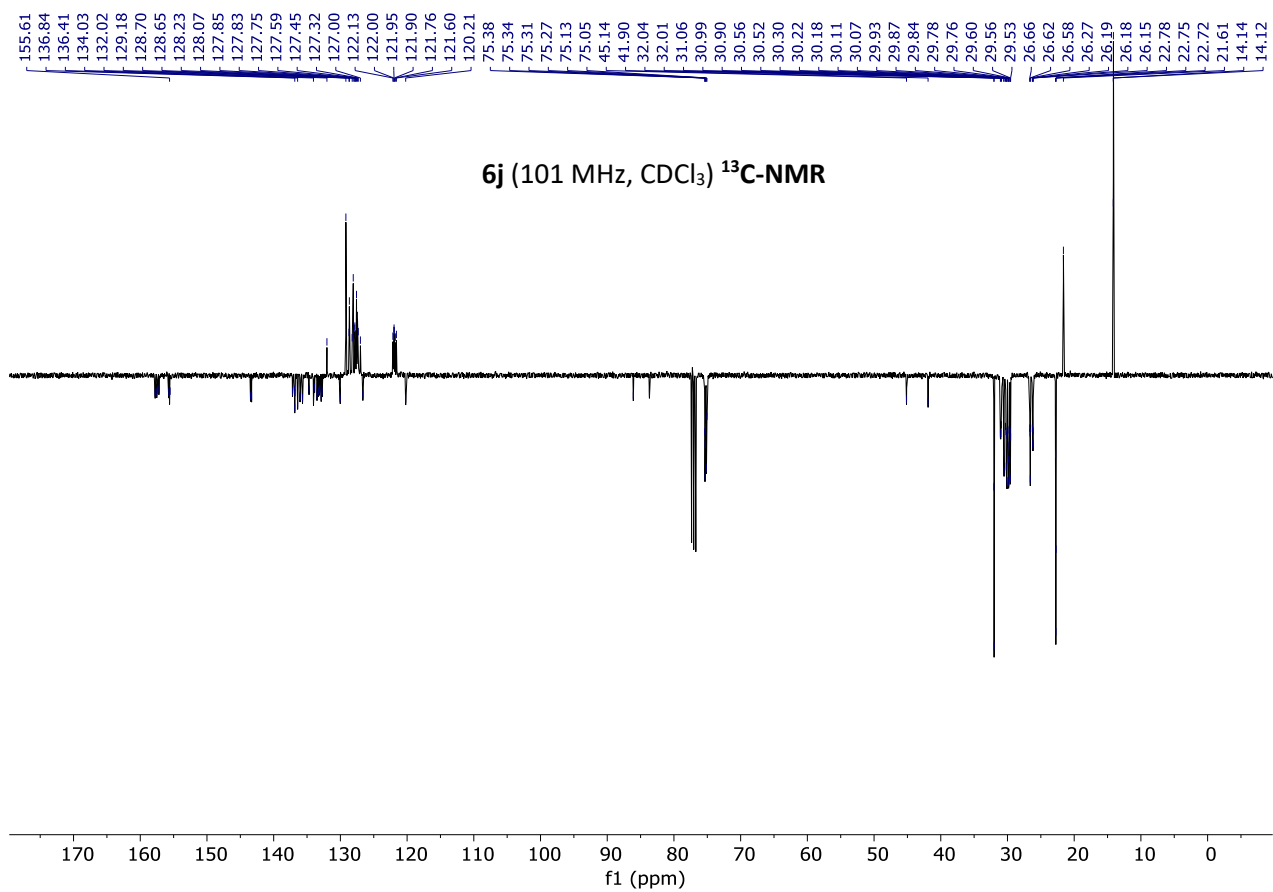

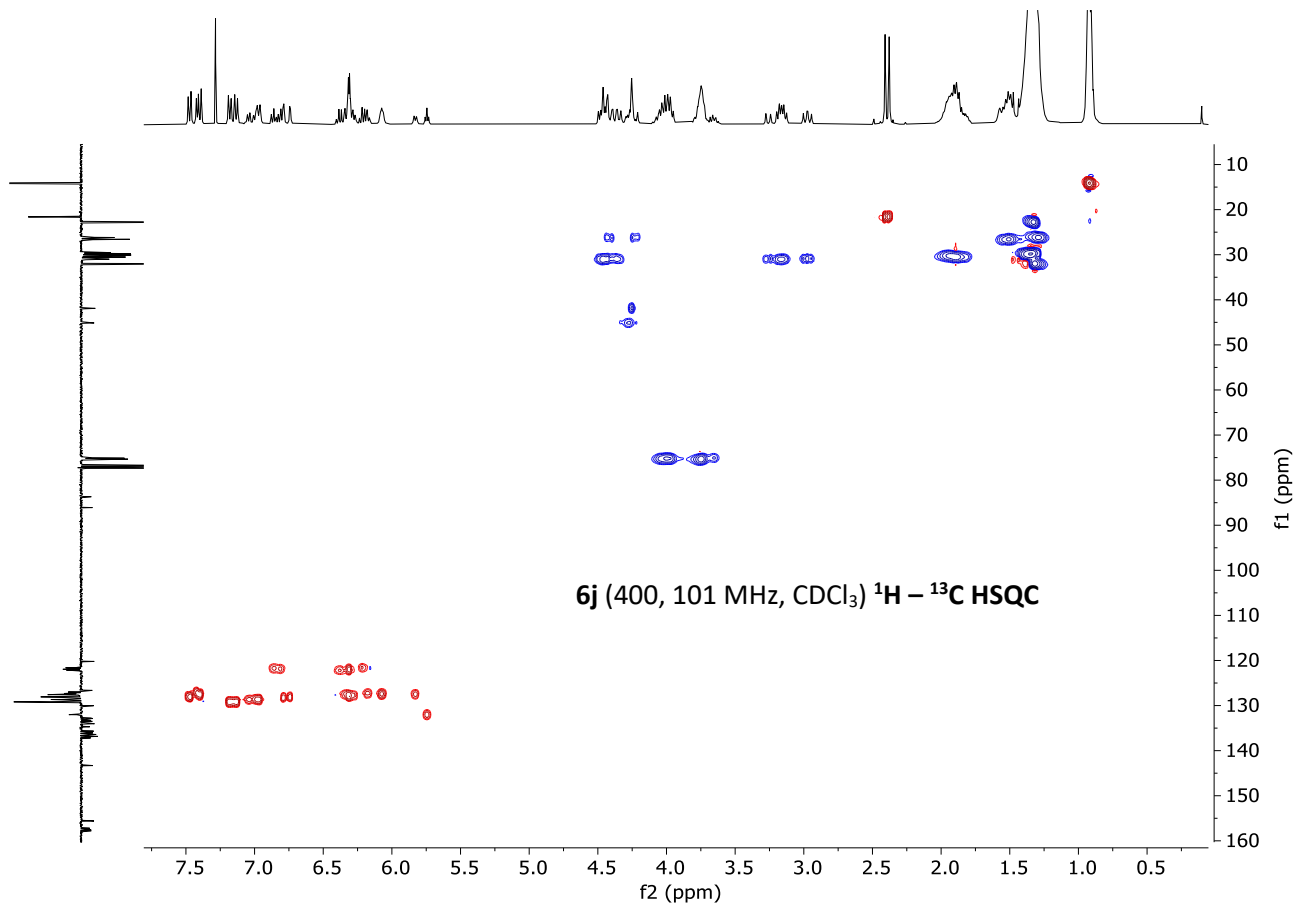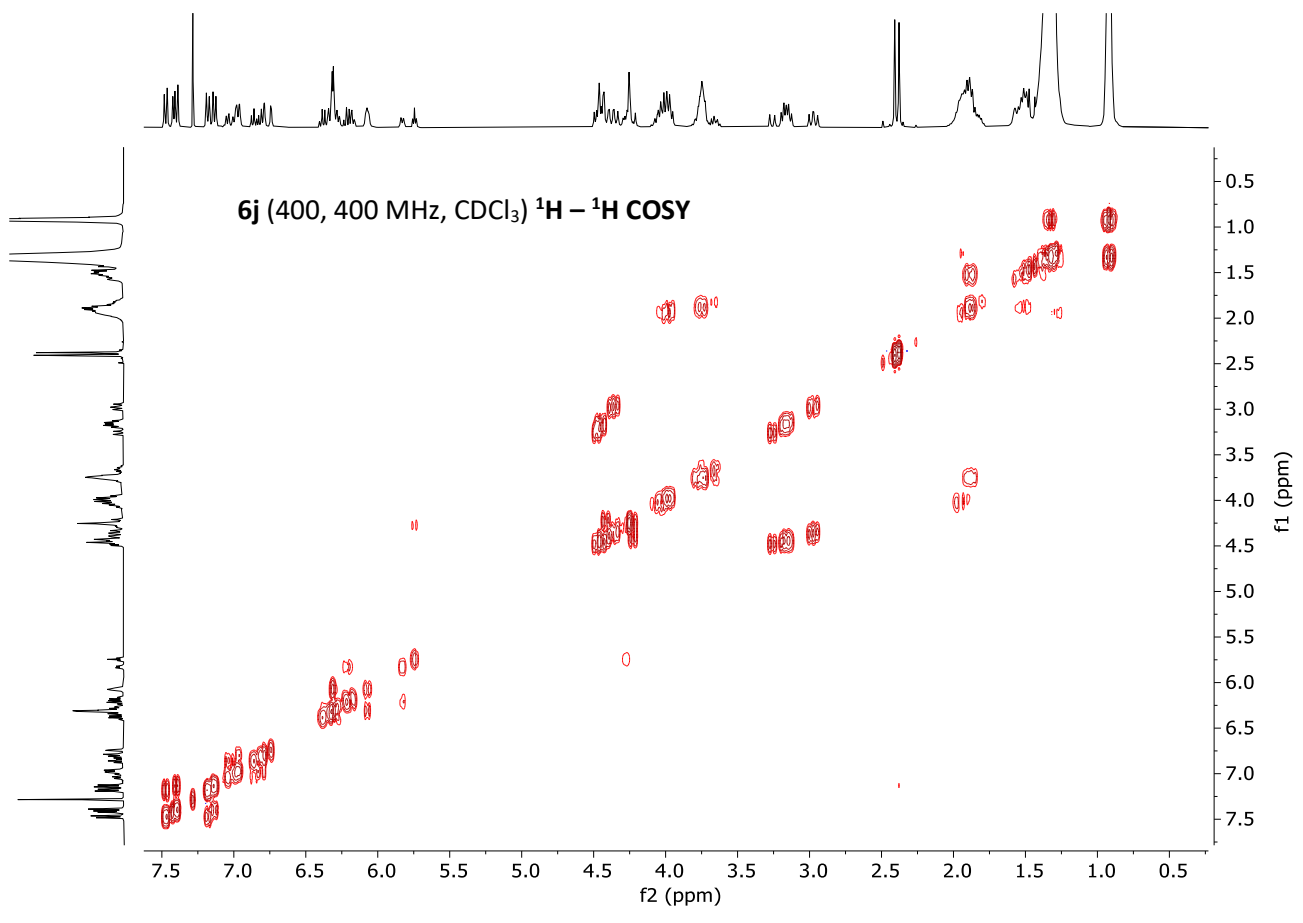

**Product 6k:**

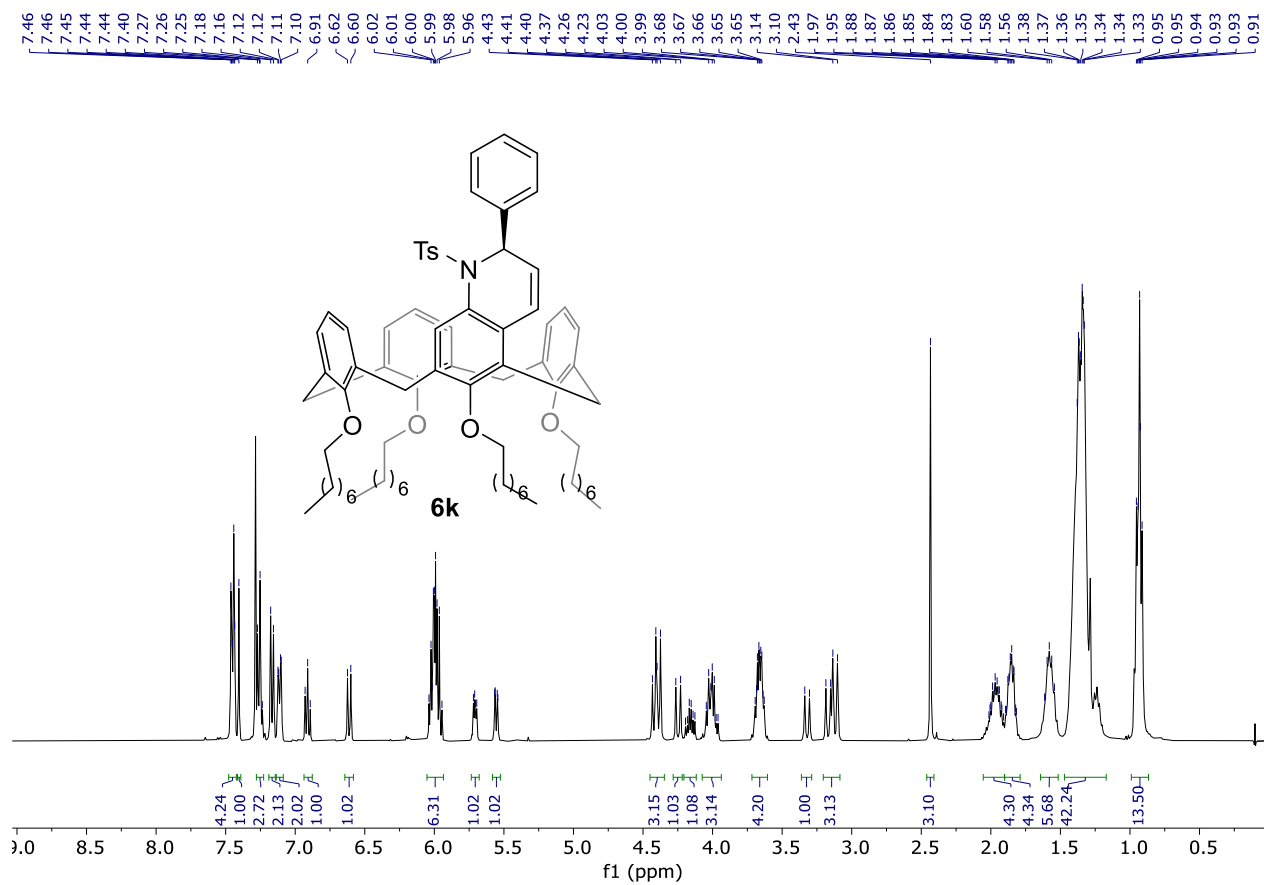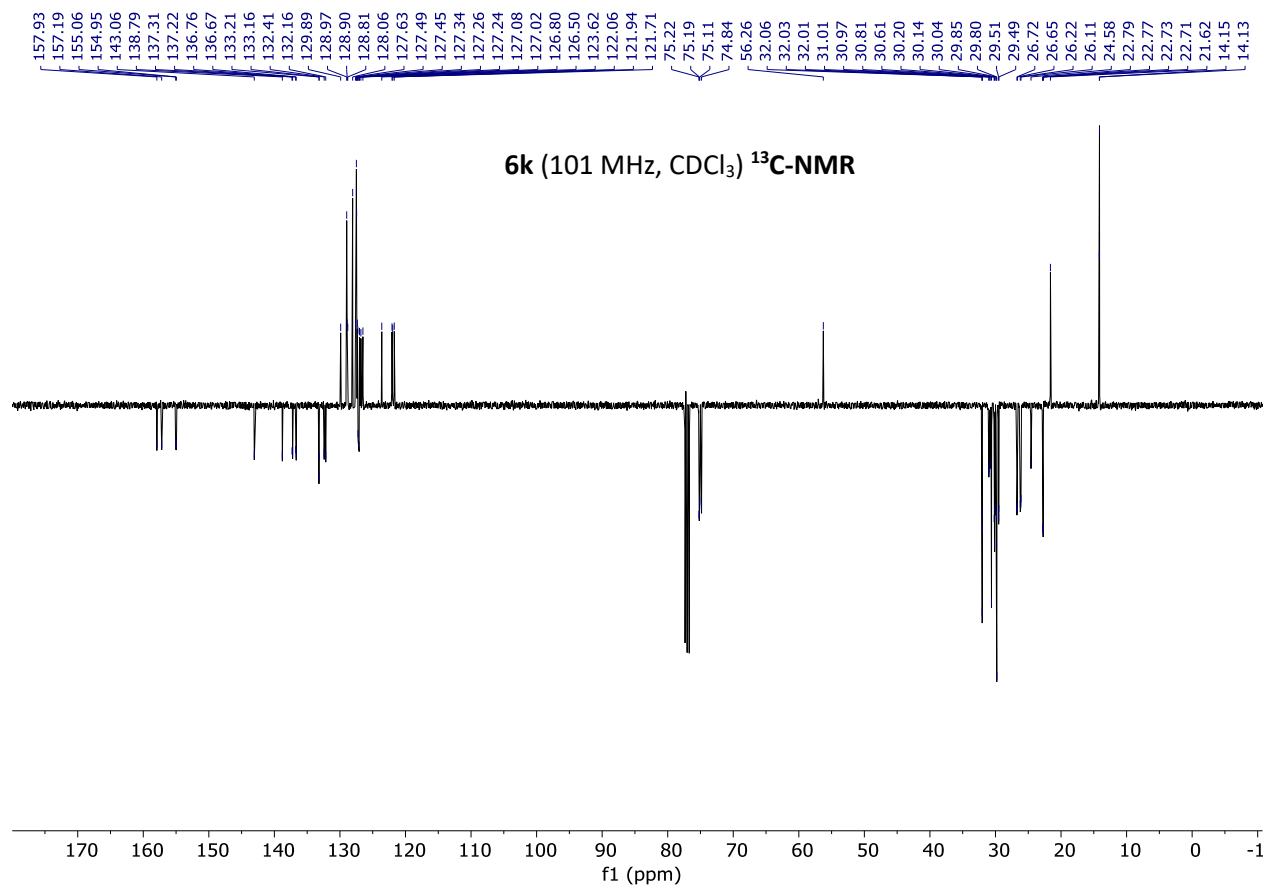

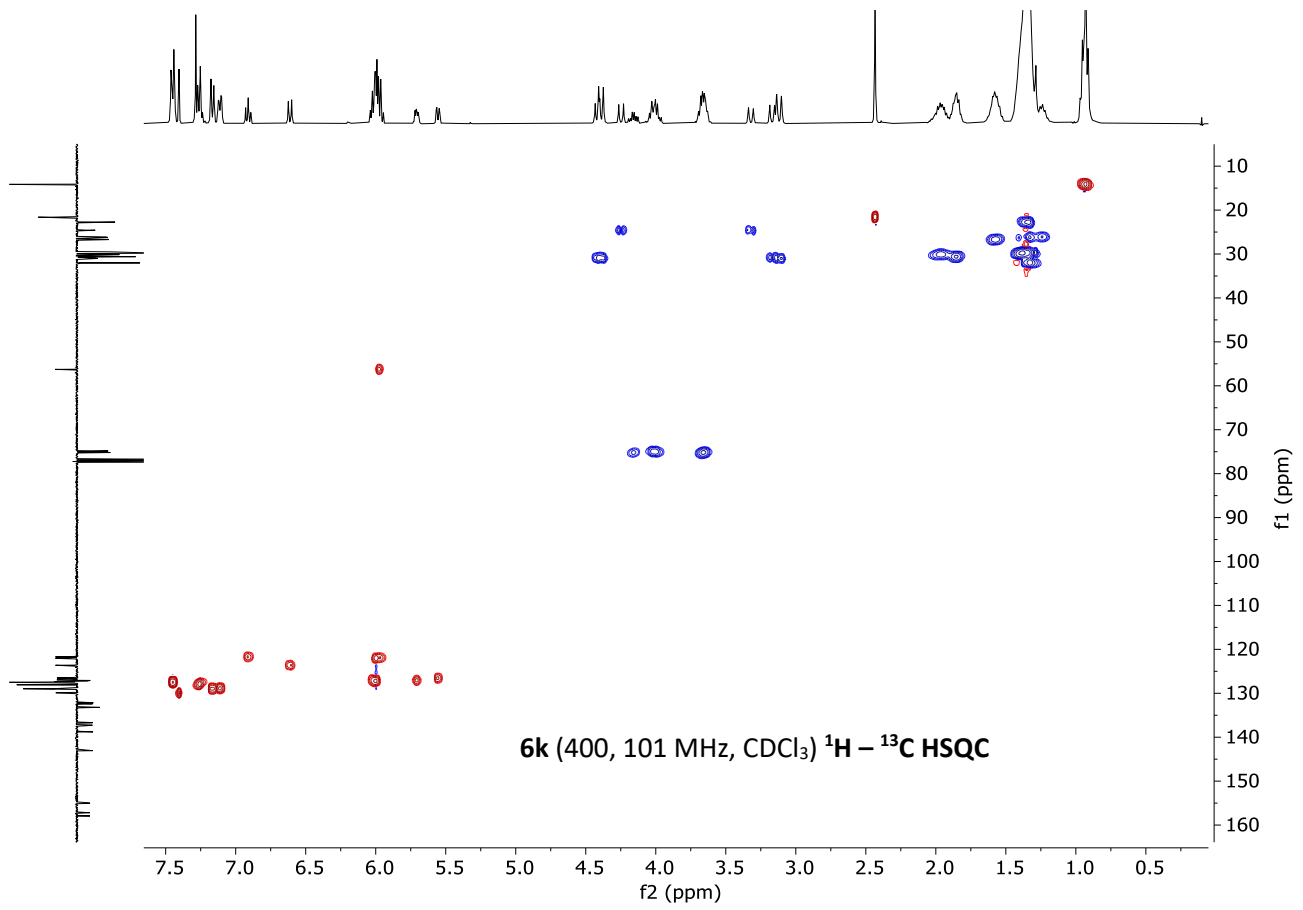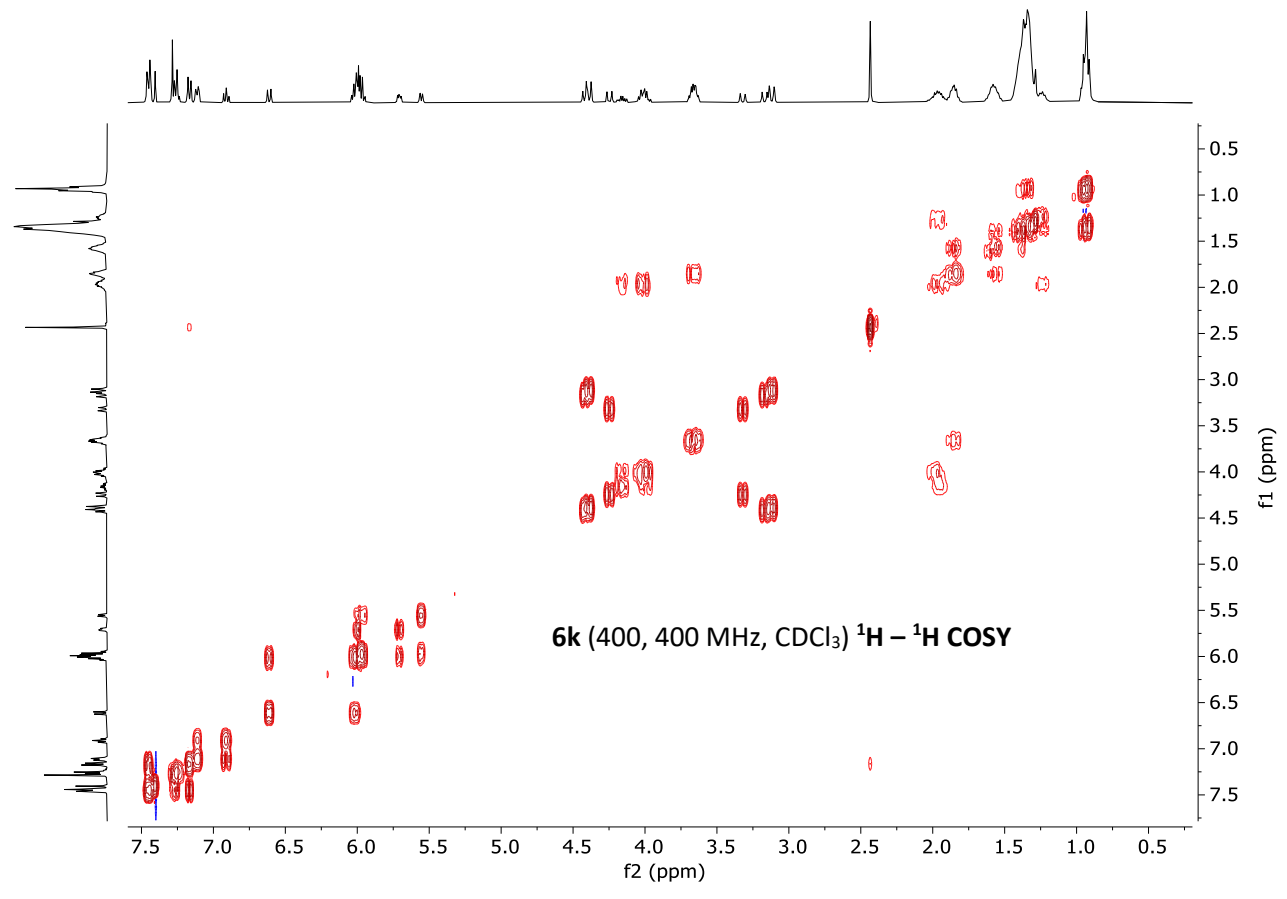

**Product 6k':**

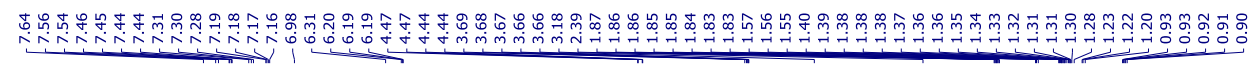

**6k' (400 MHz, CDCl<sub>3</sub>) <sup>1</sup>H-NMR**

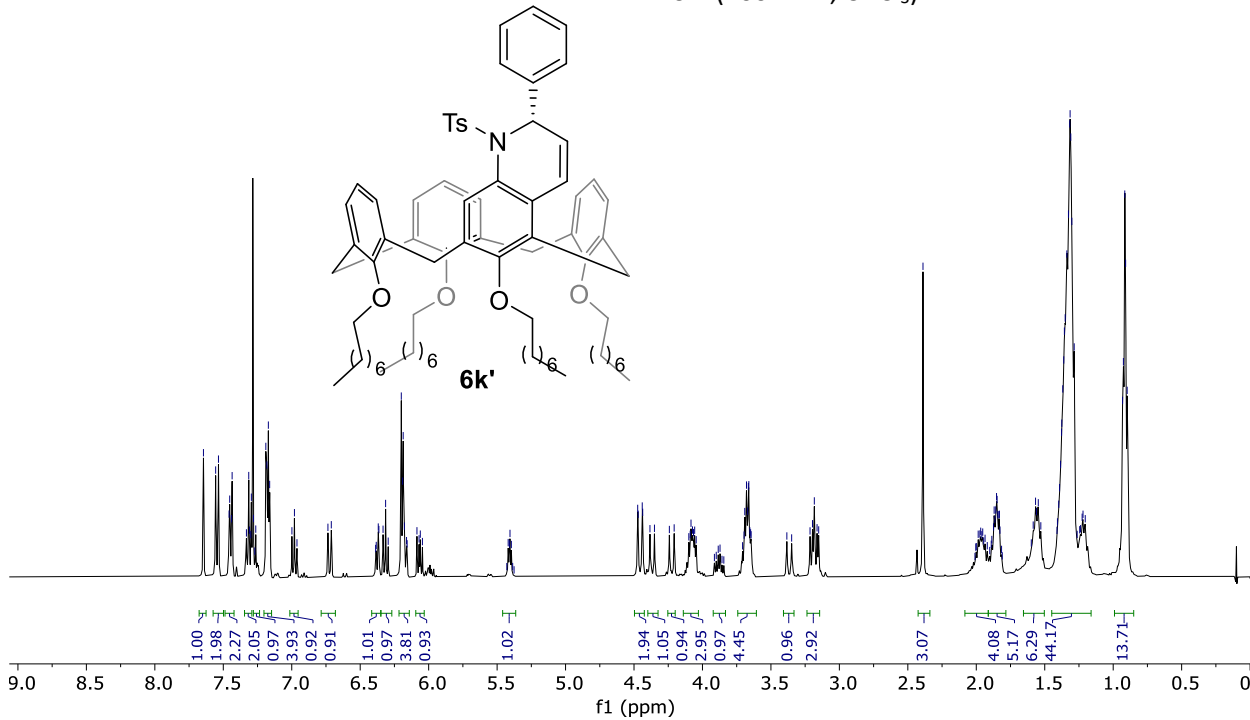

**6k' (101 MHz, CDCl<sub>3</sub>) <sup>13</sup>C-NMR**

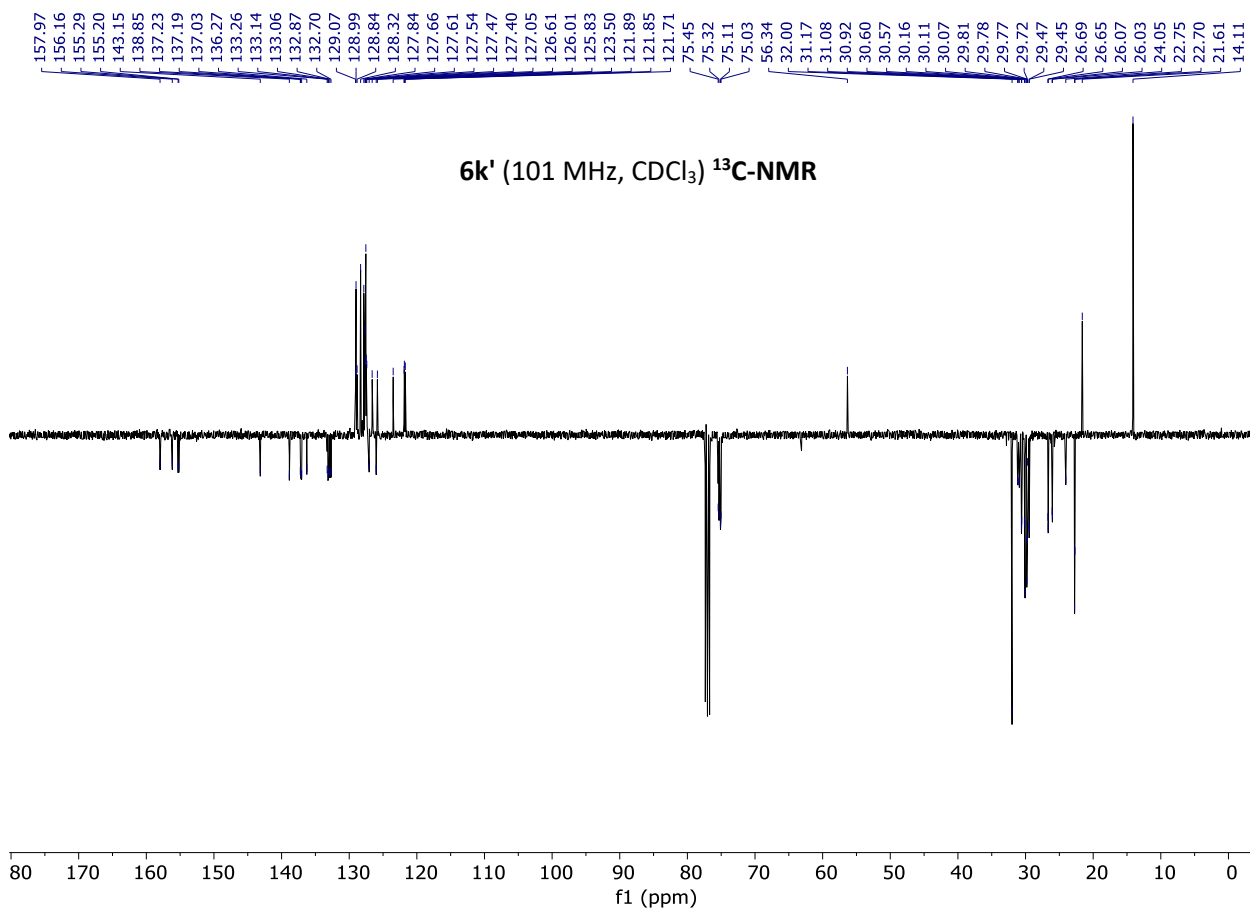

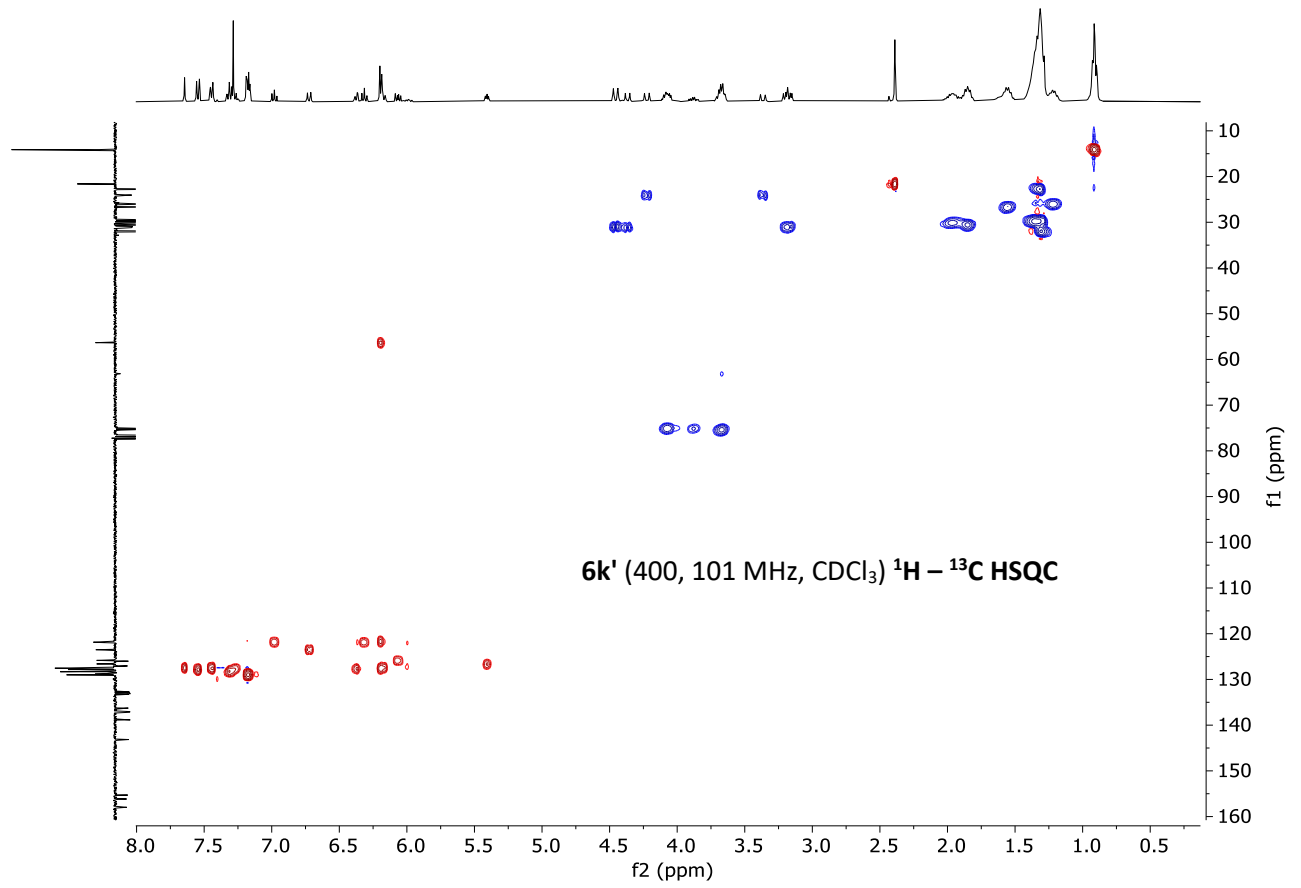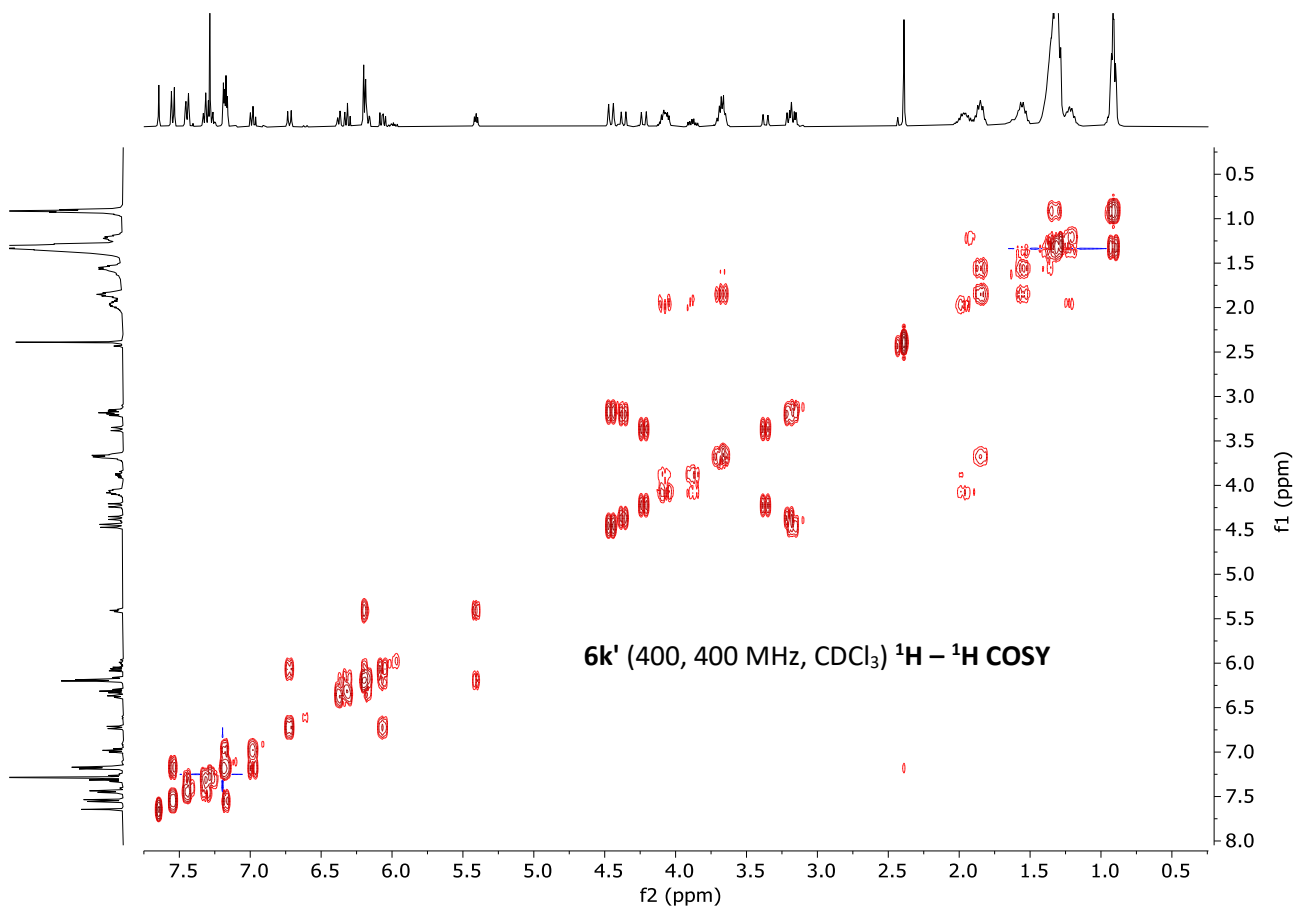

### Product 8b:

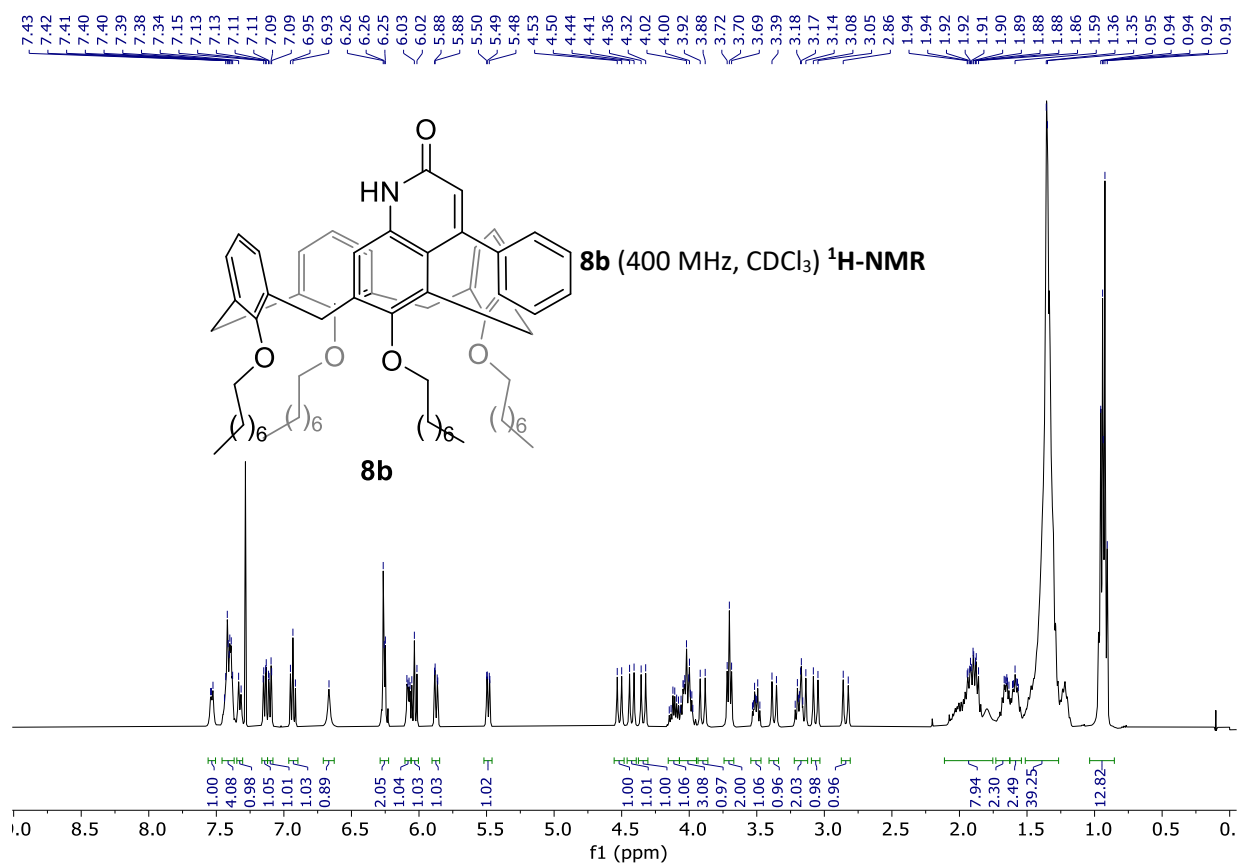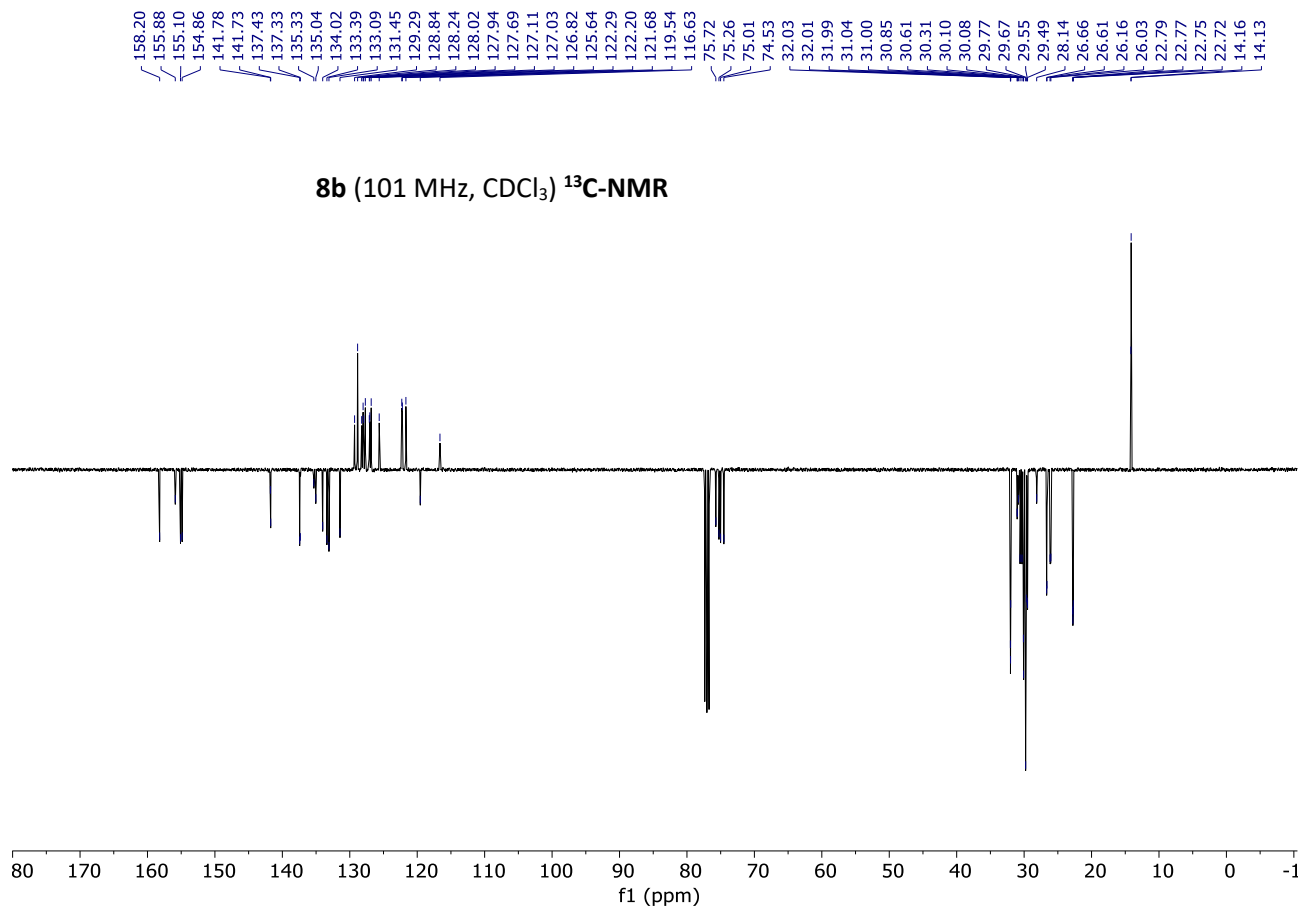

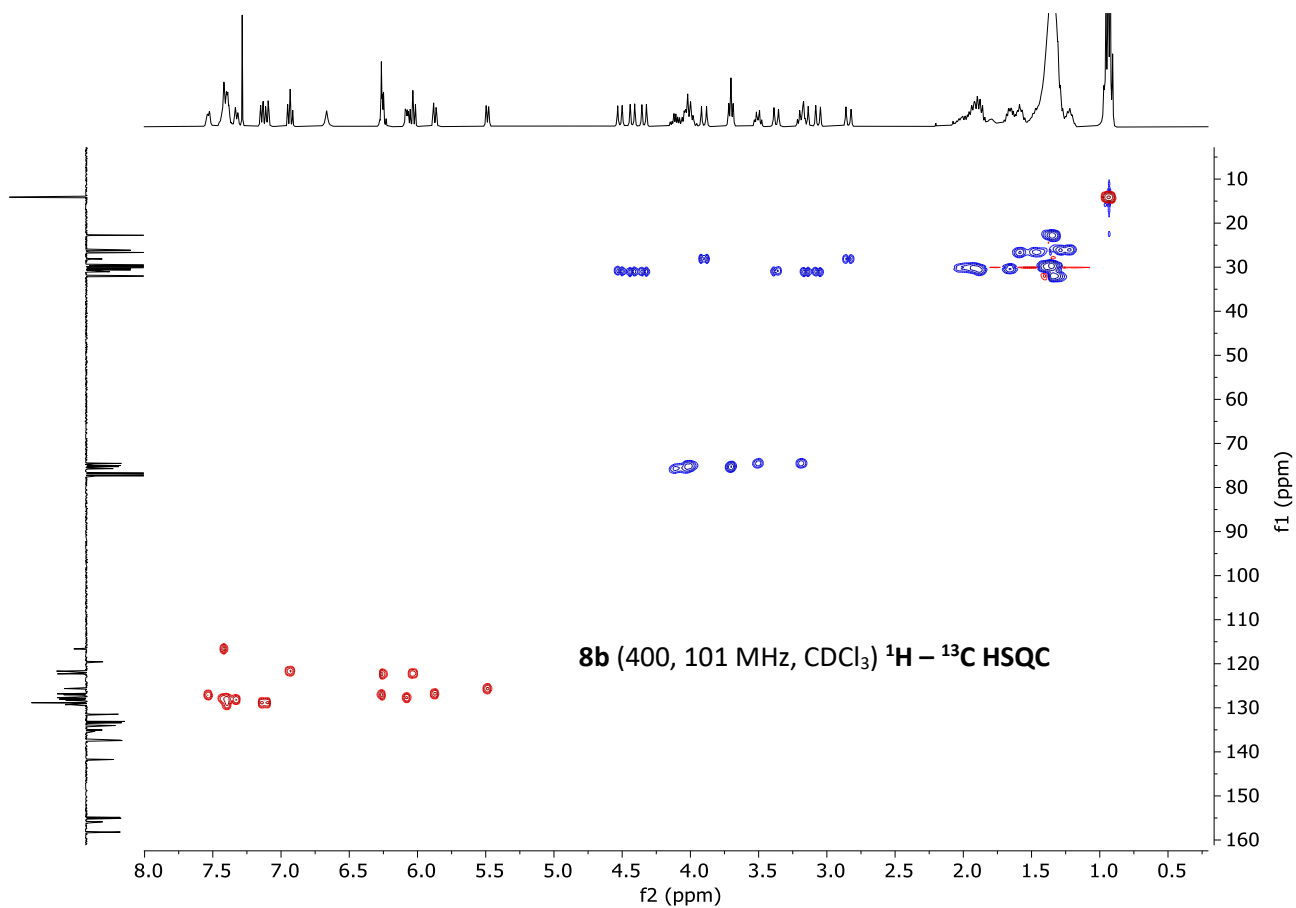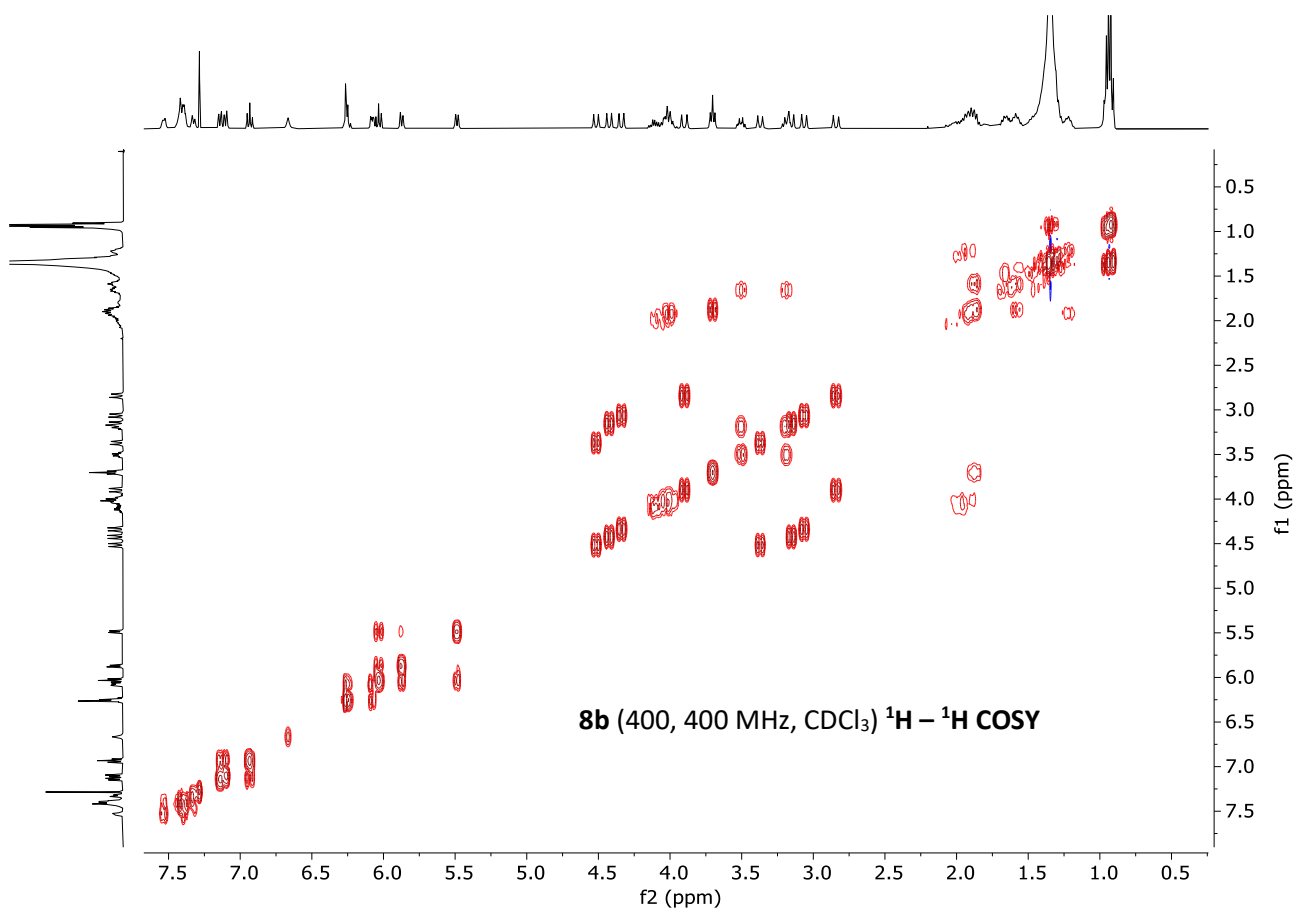



- **References**

[1] C. D. Jurisch, and G. E. Arnott, *Beilstein J. Org. Chem.* 2019, **15**, 1996–2002.

[2] Z. Chen, P. Liang, F. Xu, Z. Deng, L. Long, G. Luo and M. Ye, *J. Org. Chem.* 2019, **84**, 12639–12647.

[3] D. Lim and S. B. Park, *Chem. Eur. J.*, 2013, **19**, 7100 – 7108.
